# Supplementary material for: Succinate Dehydrogenase Mutation Underlies Global Epigenomic Divergence in Gastrointestinal Stromal Tumor
Source: Oxford University Press journal article supplement (doi:10.1158/2159-8290.cd-13-0092), 2013-04-02
Supplement: 21598290cd130092-sup-supplemental_table_2_xlsx__file_490k.xls [file 21598290cd130092-sup-supplemental_table_2_xlsx__file_490k.xls]

## Sheet: GISTPAPER_SUPPLEMENTAL TABLE 2
GoldenGate Methylation Cancer Panel I Target CpG Annotations				GIST SDH-MUTANT vs. muscularis			GIST KINASE-MUTANT vs. muscularis			PGL/PHEO SDH-MUTANT vs. adrenal			PGL/PHEO SDH-WILDTYPE vs. adrenal			GLIOMA IDH1 MUTANT vs. glia			GLIOMA IDH1 WILDTYPE vs. glia
TargetID	CPG_ISLAND	SYMBOL	ACCESSION	p-value	q-value	delta beta	p-value	q-value	delta beta	p-value	q-value	delta beta	p-value	q-value	delta beta	p-value	q-value	delta beta	p-value	q-value	delta beta
AATK_E63_R	N	AATK	XM_927215.1	0.343761	0.439997	-0.00672725	0.143288	0.382999	-0.0313533	0.554019	0.649597	-0.00429351	0.78414	0.83237	0.00243578	7.95938e-09	2.43207e-07	0.497527	8.40422e-13	4.9125e-10	0.472688
AATK_P519_R	Y	AATK	XM_927215.1	0.00377485	0.0114362	0.108004	0.370228	0.586863	0.0491919	0.258276	0.377103	0.027832	0.796679	0.844513	0.00666111	5.14522e-07	8.0215e-06	0.498676	5.77639e-08	1.79177e-06	0.42981
AATK_P709_R	Y	AATK	XM_927215.1	3.52199e-06	2.20807e-05	0.226197	0.638994	0.792807	0.0446214	0.53727	0.634193	0.026949	0.262263	0.339088	0.0842468	8.59632e-06	7.34543e-05	0.425036	1.42328e-06	2.12249e-05	0.394149
ABCA1_E120_R	Y	ABCA1	NM_005502.2	0.135709	0.220024	0.0167648	0.290889	0.509908	0.00358314	0.277524	0.398017	0.045731	0.00343837	0.00868103	-0.0111488	0.00738607	0.0135868	-0.0245157	0.565324	0.714093	0.0246775
ABCA1_P45_F	Y	ABCA1	NM_005502.2	0.397137	0.492334	0.0181021	0.350776	0.568456	-0.00574542	0.241245	0.356987	0.0660044	0.000140628	0.000851532	-0.0240977	0.00124149	0.00300304	-0.0442037	0.0302154	0.076712	-0.0310332
ABCB4_E429_F	N	ABCB4	NM_018850.1	0.0306427	0.0660129	-0.045582	0.152212	0.387543	-0.0300773	0.149308	0.249009	-0.0122775	0.95522	0.965911	-0.00034265	0.0519251	0.0777358	0.0317375	0.694849	0.82416	-0.0184754
ABCB4_P51_F	N	ABCB4	NM_018850.1	0.0273541	0.0601948	-0.0241802	0.356168	0.574658	-0.0216639	0.691089	0.764778	0.00241867	0.484675	0.562707	0.00645201	2.10658e-06	2.36183e-05	0.0918931	0.526288	0.684983	-0.040324
ABCB4_P892_F	N	ABCB4	NM_018850.1	0.00232742	0.00759006	-0.147077	0.0463444	0.213129	-0.113003	0.454099	0.565395	-0.0120412	0.606543	0.676363	-0.0100376	0.171406	0.225411	0.11047	0.283242	0.454607	0.0874138
ABCC2_E16_R	N	ABCC2	NM_000392.1	0.400622	0.495854	-0.035543	0.373025	0.589749	-0.0337729	0.00940829	0.0250453	0.0191213	0.286389	0.366272	0.0144342	0.0800561	0.113963	0.140067	0.0123963	0.0364766	0.142102
ABCC2_P88_F	N	ABCC2	NM_000392.1	0.0168479	0.0405382	-0.0223231	0.571918	0.740072	-0.00613459	0.326552	0.444667	-0.0200375	0.141986	0.20082	-0.0447716	0.0129522	0.0224038	0.0408319	0.664832	0.799217	-0.0220531
ABCC5_P444_F	Y	ABCC5	NM_005688.2	0.0725646	0.131147	0.0146098	0.74093	0.866109	0.0018367	0.00175746	0.00629245	-0.0140851	0.00252334	0.00670561	-0.0199498	0.000139264	0.000581275	-0.0440392	0.537312	0.695292	-0.012847
ABCG2_P178_R	Y	ABCG2	NM_004827.2	0.143812	0.229739	0.0637072	0.54706	0.721894	0.0125487	0.000948772	0.00378523	-0.0316745	0.0507405	0.0822993	-0.0255878	0.322802	0.391337	0.0724872	0.279526	0.450527	-0.0398134
ABCG2_P310_R	Y	ABCG2	NM_004827.2	0.000251636	0.00106771	0.394997	0.913398	0.95832	-0.00422047	0.00655239	0.0183658	-0.0294875	1.79999e-05	0.000251325	-0.0520527	4.7874e-08	1.16721e-06	0.641055	0.134291	0.251857	0.104301
ABL1_P53_F	Y	ABL1	NM_005157.3	0.235365	0.33076	0.010834	0.289967	0.509908	0.0110807	0.717936	0.788241	-0.00376978	0.150152	0.209858	-0.0179596	0.00146963	0.00342999	-0.077215	0.000198724	0.00101073	-0.0777124
ABL2_P459_R	Y	ABL2	NM_007314.1	0.933148	0.951736	0.0003436	0.182775	0.411444	-0.0047844	0.012181	0.03134	-0.0286062	0.0145622	0.0284573	-0.0407266	1.25343e-05	9.74819e-05	-0.0865278	3.43216e-08	1.42481e-06	-0.0806379
ABO_E110_F	Y	ABO	NM_020469.2	0.0585483	0.110269	0.00987787	0.700166	0.84111	0.00117208	0.000142535	0.000813883	-0.0178554	0.0435116	0.0732023	-0.0156909	0.000221359	0.000805226	-0.0466265	9.48519e-06	8.14601e-05	-0.0411475
ABO_P312_F	Y	ABO	NM_020469.2	0.979963	0.983806	0.000254798	0.797314	0.900496	0.00365335	1.23858e-06	2.04565e-05	-0.0304859	0.0230998	0.0418906	-0.0228601	8.62223e-08	1.83941e-06	-0.0755608	7.96742e-11	2.03966e-08	-0.0704305
ACTG2_E98_R	N	ACTG2	NM_001615.3	0.0657524	0.121243	0.167506	0.000123453	0.00286752	-0.277279	0.426771	0.540858	-0.0341202	0.0187015	0.0351167	-0.144137	0.344584	0.413179	-0.0576161	0.447731	0.621242	0.0459189
ACTG2_P346_F	N	ACTG2	NM_001615.3	0.715125	0.783475	0.0283322	0.00046284	0.0083638	-0.246631	0.000520261	0.00231629	-0.188668	0.00042725	0.00182417	-0.227553	0.197058	0.253501	-0.0768725	0.250681	0.412254	0.0610932
ACTG2_P455_R	N	ACTG2	NM_001615.3	2.71173e-06	1.75747e-05	0.265865	0.000407594	0.00763493	0.207593	0.0791884	0.147613	0.00991533	0.065195	0.102288	-0.0734218	0.669351	0.719738	-0.0236956	0.941497	0.960877	-0.0032713
ACVR1B_E497_R	Y	ACVR1B	NM_004302.3	0.855279	0.900417	0.000486758	0.288309	0.508772	0.00627688	0.000195022	0.00104739	-0.0134758	0.00219625	0.00605217	-0.0147858	0.00404018	0.00800738	-0.0528317	0.000321669	0.0015392	-0.047633
ACVR1B_P572_R	Y	ACVR1B	NM_004302.3	0.00102105	0.00371643	0.274264	0.0766385	0.279946	-0.0541421	0.989155	0.991737	0.000273732	0.00135843	0.00419829	-0.0614238	0.0319695	0.0501073	-0.07128	0.0322227	0.0802405	-0.0599928
ACVR1C_P115_R	Y	ACVR1C	NM_145259.1	0.0638416	0.118151	0.145616	0.193015	0.424742	-0.0102355	0.000479133	0.00215862	-0.0171781	0.000796283	0.0028117	-0.02306	0.000875903	0.00226115	-0.041215	3.98592e-05	0.000255099	-0.0380583
ACVR1C_P363_F	Y	ACVR1C	NM_145259.1	3.55865e-08	3.5039e-07	0.518872	0.382488	0.600637	-0.0269196	0.194075	0.302026	0.0449527	0.00998642	0.0205894	-0.0616563	5.26375e-05	0.000279762	0.424622	0.323625	0.500592	0.0499084
ACVR1_E328_R	N	ACVR1	NM_001105.2	4.03757e-11	6.32827e-10	0.464098	0.274148	0.495984	0.09358	0.875582	0.906263	0.010356	0.000453659	0.00189869	-0.205874	0.000100056	0.00043929	-0.186187	0.453352	0.625089	-0.0499207
ACVR1_P983_F	N	ACVR1	NM_001105.2	0.539664	0.621539	0.0481273	0.0444319	0.208516	-0.158365	0.002628	0.00867599	-0.181779	1.56728e-06	7.01862e-05	-0.288993	1.22814e-12	1.25762e-10	-0.585481	0.0140923	0.0404595	-0.198201
ACVR2B_E27_R	Y	ACVR2B	NM_001106.2	0.237247	0.332795	0.0787626	0.308868	0.531863	-0.00393865	3.12228e-06	4.13433e-05	-0.022942	7.49388e-05	0.000573695	-0.0278244	0.000113599	0.000492903	-0.0436483	8.57262e-08	2.3941e-06	-0.0470439
ACVR2B_P676_F	Y	ACVR2B	NM_001106.2	0.000213212	0.000926855	0.353824	0.405237	0.617675	-0.0216377	2.27243e-06	3.26211e-05	-0.0835913	0.00905287	0.0191532	-0.0545678	0.000475347	0.00142883	-0.078747	0.000821867	0.00355602	-0.0688154
ADAMTS12_E52_R	Y	ADAMTS12	NM_030955.2	0.00808144	0.0215132	0.23546	0.0357508	0.18678	-0.0154883	0.150495	0.250174	0.101551	0.252033	0.327238	-0.0820965	0.30393	0.371981	0.0424273	0.70601	0.828688	0.023586
ADAMTS12_P250_R	Y	ADAMTS12	NM_030955.2	0.0415866	0.0840488	0.103427	0.912225	0.957742	-0.000362585	0.145564	0.243559	0.0572034	0.468068	0.547769	0.0254418	0.00198154	0.00439832	-0.0206065	0.752589	0.862025	-0.00583051
ADCYAP1_E163_R	Y	ADCYAP1	NM_001117.2	0.106755	0.182601	0.00615473	0.208317	0.439666	0.00333671	0.099713	0.178716	-0.00913942	0.00215847	0.0059845	-0.0173281	0.0056501	0.0107011	-0.0257326	0.000604124	0.00270317	-0.0272906
ADCYAP1_P398_F	Y	ADCYAP1	NM_001117.2	0.974388	0.980182	0.000233475	0.374079	0.589924	0.0119245	0.91657	0.940147	-0.00492971	0.178032	0.243073	-0.0302394	0.842156	0.866411	0.00651343	0.792195	0.883669	0.0101771
ADCYAP1_P455_R	Y	ADCYAP1	NM_001117.2	0.711716	0.781412	0.00157755	0.538784	0.716513	0.00742693	0.757636	0.818375	0.0110121	0.000854908	0.0029709	-0.0233705	1.59731e-06	1.9472e-05	-0.0588849	2.86739e-09	2.20216e-07	-0.0557659
AFF3_P122_F	N	AFF3	NM_001025108.1	0.00292301	0.00923816	-0.0748569	0.224234	0.451408	-0.023628	0.269724	0.390109	0.00939984	0.000360949	0.00159775	0.0323747	0.00308116	0.00634404	0.0482812	0.823667	0.903036	0.00531904
AFF3_P808_F	N	AFF3	NM_001025108.1	0.0211072	0.0487529	-0.0637462	0.163008	0.39122	-0.0297414	0.0247824	0.0568994	-0.0179428	0.150079	0.209858	-0.022594	0.388503	0.454781	-0.0321787	0.734228	0.849867	-0.00860512
AFP_P824_F	N	AFP	NM_001134.1	0.00201856	0.00669657	-0.212201	0.0737936	0.274845	-0.110781	0.328631	0.447101	-0.0192092	0.00144587	0.00438903	-0.0798971	0.0742207	0.106744	-0.200567	0.888333	0.933935	-0.00658536
AGTR1_P154_F	Y	AGTR1	NM_000685.3	2.79203e-05	0.000145869	0.480764	0.172591	0.402479	-0.0357397	0.000141238	0.000811233	0.280932	0.00616445	0.0140068	-0.0405781	0.0131885	0.0227358	0.185367	0.567239	0.715924	0.0294086
AGTR1_P41_F	Y	AGTR1	NM_000685.3	2.24678e-05	0.000121516	0.415267	0.813796	0.909804	-0.00382261	0.17739	0.283426	0.0296366	0.000525984	0.00213169	-0.0232651	0.00535242	0.0102293	-0.0313398	0.703898	0.828526	-0.0078944
AGXT_E115_R	N	AGXT	NM_000030.1	0.00426711	0.012653	-0.165931	0.141175	0.381768	-0.0361555	0.752912	0.814418	0.0134442	0.288206	0.36829	-0.0579816	0.000178587	0.000690957	0.106556	5.09733e-07	1.0302e-05	0.117618
AGXT_P180_F	N	AGXT	NM_000030.1	0.00697181	0.0191227	-0.190024	0.133282	0.370034	-0.0731664	0.176792	0.283162	-0.0365198	0.324844	0.409656	-0.0213449	0.305776	0.373943	-0.0520543	0.36002	0.541617	-0.0505807
AHR_E103_F	Y	AHR	NM_001621.2	0.0648434	0.119855	0.102523	0.445805	0.645996	-0.00313516	0.00115513	0.0043918	-0.0112414	0.00123894	0.00397288	-0.0145823	0.000186317	0.000715457	-0.0445502	0.99798	0.99798	-7.32859e-05
AHR_P166_R	Y	AHR	NM_001621.2	0.0378288	0.0780982	0.246346	0.00408159	0.0426951	-0.0538256	7.85138e-05	0.000515373	-0.0258242	0.000129231	0.000817394	-0.0372951	0.549669	0.607841	-0.0195324	0.365574	0.547694	0.0683852
AIM2_E208_F	N	AIM2	NM_004833.1	0.0030888	0.00972214	-0.122713	0.0569698	0.235864	-0.107693	0.111255	0.194412	0.0316375	0.60392	0.675092	-0.0155767	0.00546684	0.0104182	0.0512118	0.788181	0.881964	0.00711322
AIM2_P624_F	N	AIM2	NM_004833.1	0.0127873	0.0325725	-0.0876233	0.187897	0.419491	-0.0845497	0.596798	0.685113	0.00917433	0.178593	0.243618	-0.0988993	0.827276	0.855158	0.00581466	0.397872	0.577083	-0.0269961
AKT1_P310_R	Y	AKT1	NM_001014432.1	0.00366846	0.0112023	0.275405	0.908466	0.956097	-0.000603734	0.192022	0.299742	0.0946232	0.55964	0.630869	0.0193965	0.292016	0.359117	0.0608474	0.0329987	0.0818837	-0.051574
ALK_E183_R	Y	ALK	NM_004304.3	0.570465	0.650508	-0.00387273	0.268548	0.494969	-0.00631145	0.00646634	0.0182244	-0.0206262	0.000905302	0.00311781	-0.0328725	4.77468e-06	4.5403e-05	-0.121428	3.08414e-08	1.3535e-06	-0.110414
ALK_P28_F	Y	ALK	NM_004304.3	0.53885	0.621377	0.00138419	0.268251	0.494969	0.00388795	0.00127208	0.00474252	-0.0220205	0.00615444	0.0140048	-0.0277762	0.000211085	0.000786959	-0.0451186	8.02986e-06	7.38554e-05	-0.0399331
ALOX12_E85_R	Y	ALOX12	NM_000697.1	8.25771e-21	5.76538e-19	0.68141	0.501302	0.690509	0.0367173	6.70243e-05	0.000469817	0.277445	0.395703	0.478206	-0.0651897	8.14184e-11	5.21077e-09	0.554905	0.0030099	0.0111402	0.286397
ALOX12_P223_R	Y	ALOX12	NM_000697.1	5.62715e-21	4.54911e-19	0.631714	0.752146	0.87372	0.0167489	0.000565023	0.00247258	0.265359	0.974577	0.981362	-0.00247657	3.68524e-09	1.28648e-07	0.331138	0.943502	0.961133	0.00538632
ALPL_P278_F	Y	ALPL	NM_000478.2	1.74302e-08	1.78485e-07	0.56631	0.495856	0.687396	-0.00890919	0.118328	0.204676	0.0936176	0.230814	0.302758	0.0422178	0.595931	0.651031	-0.00789502	0.0971536	0.194055	-0.0220082
ALPL_P433_F	Y	ALPL	NM_000478.2	0.00267257	0.00860602	0.216693	0.00269308	0.0325714	-0.195871	0.000629929	0.00268335	0.246937	0.819621	0.863643	0.0146764	0.323794	0.39223	0.0771845	0.430551	0.606324	-0.0508254
AOC3_P890_R	N	AOC3	NM_003734.2	3.16136e-05	0.000161862	0.234903	0.138786	0.379317	-0.128029	0.101975	0.181499	-0.0634917	0.000193392	0.00105229	-0.270725	0.836899	0.862736	-0.016125	0.324063	0.500766	-0.0685761
APBA1_E99_R	Y	APBA1	NM_001163.2	0.903996	0.931994	-0.00144707	0.941259	0.966427	0.00116142	3.08974e-06	4.13433e-05	-0.0718353	7.10036e-05	0.00055929	-0.0895909	0.0649274	0.0949796	-0.0687994	0.00221749	0.00850393	-0.0837156
APBA1_P644_F	Y	APBA1	NM_001163.2	0.647169	0.723999	0.00362572	0.828743	0.915133	-0.00127159	1.74862e-06	2.63321e-05	-0.028638	2.34334e-05	0.000295031	-0.0361227	0.000354319	0.00114294	-0.0561237	0.0646921	0.139757	-0.0441339
APBA2_P227_F	N	APBA2	NM_005503.2	0.00922272	0.0241742	-0.182435	0.0644562	0.251281	-0.0955835	0.660295	0.741383	0.0039455	0.105756	0.156043	0.0194707	0.025404	0.0407312	0.0829668	5.98093e-05	0.000360263	0.103078
APBA2_P305_R	N	APBA2	NM_005503.2	0.00044427	0.00180836	-0.265924	0.0221466	0.134273	-0.0770778	0.363441	0.477133	0.0114063	0.032387	0.0560838	0.0335262	0.000456502	0.00138849	0.07209	0.000566764	0.00255293	0.0617164
APC_E117_R	Y	APC	NM_000038.3	9.32271e-09	1.03019e-07	0.406769	0.039404	0.196477	-0.0697548	3.07679e-05	0.000248037	-0.0829693	1.06837e-06	5.332e-05	-0.13221	2.95526e-09	1.05565e-07	-0.398212	7.65098e-10	7.17429e-08	-0.38506
APC_P14_F	Y	APC	NM_000038.3	4.0702e-07	3.14162e-06	0.473851	9.38545e-05	0.00232517	-0.229203	3.32161e-08	1.37892e-06	-0.154185	0.000505068	0.00207429	-0.138492	0.000235546	0.000837979	-0.148696	0.0419991	0.0995535	-0.0949176
APC_P280_R	Y	APC	NM_000038.3	1.11023e-08	1.21808e-07	0.521151	0.000315749	0.00613912	-0.0655472	0.153626	0.252863	-0.00440743	0.0115562	0.0231728	-0.0106628	0.00067042	0.00181937	-0.0301608	5.70823e-05	0.000349316	-0.0264051
APOA1_P261_F	N	APOA1	NM_000039.1	0.328035	0.427727	-0.0322551	0.574314	0.741923	-0.0299704	0.00107988	0.00415713	-0.133096	0.0232418	0.0420488	-0.121945	3.20117e-05	0.000194348	0.431167	0.00722766	0.0231285	0.222749
APOA1_P75_F	N	APOA1	NM_000039.1	0.471826	0.562075	-0.0179158	0.280174	0.501571	-0.0598432	0.153407	0.252863	0.0706223	0.068864	0.106952	-0.134302	0.755455	0.797512	0.0294111	0.00035115	0.0016545	0.216986
APOC1_P406_R	Y	APOC1	NM_001645.3	2.99527e-05	0.000154387	-0.159982	0.327676	0.548865	-0.0405949	7.37567e-05	0.000499076	-0.1074	0.0129826	0.0256315	-0.0901142	0.072576	0.104771	0.0818187	0.264929	0.430159	0.0462465
APOC2_P377_F	N	APOC2	NM_000483.3	6.5802e-06	3.93276e-05	-0.214575	0.0198129	0.125237	-0.163562	0.317647	0.435027	-0.0330463	0.0441587	0.0738149	-0.117435	0.35431	0.423847	0.0415986	0.474558	0.645063	-0.049375
APP_E8_F	Y	APP	NM_201413.1	0.825559	0.876337	-0.00031575	0.106624	0.32999	0.00398341	0.0152128	0.0376884	-0.00594673	0.000105639	0.000717974	-0.0131225	0.000179729	0.000693626	-0.0238196	4.94221e-06	5.02598e-05	-0.021859
APP_P179_R	Y	APP	NM_201413.1	0.472055	0.562075	-0.00352963	0.383814	0.600957	-0.00406522	1.4181e-05	0.000137187	-0.023307	5.245e-05	0.000473901	-0.0293681	0.000409172	0.00128789	-0.0557255	2.1114e-07	4.76927e-06	-0.0591934
ARAF_E38_F	Y	ARAF	NM_001654.1	0.13972	0.22481	-0.172072	0.341164	0.564078	-0.116432	0.720888	0.789012	-0.0419602	0.924155	0.946146	0.0133069	0.900898	0.913989	-0.00721823	0.000167612	0.000878675	0.437867
ARAF_P63_R	Y	ARAF	NM_001654.1	0.0410895	0.0832631	-0.0956596	0.504587	0.693863	-0.0425631	0.0679265	0.130746	-0.0591661	0.340051	0.42534	-0.0447874	0.22831	0.287751	-0.0299356	0.00454654	0.0158356	0.160699
AREG_E25_F	Y	AREG	NM_001657.2	0.392008	0.487654	0.0360832	0.550267	0.723937	0.00269044	4.10749e-05	0.000313886	-0.0170095	0.430412	0.514885	0.0341287	0.365292	0.433943	0.0395785	0.778839	0.874486	-0.00834154
AREG_P217_R	Y	AREG	NM_001657.2	0.00130393	0.00463618	0.313007	0.00664961	0.0600812	-0.0599215	0.88829	0.917561	-0.00710214	0.39714	0.479565	-0.0477499	7.48218e-08	1.61868e-06	0.511921	0.00245593	0.00929139	0.263017
ARHGAP9_P260_F	N	ARHGAP9	NM_032496.1	0.0315858	0.0675707	-0.0835798	0.105376	0.32831	-0.101636	0.742474	0.805395	-0.00496717	0.929768	0.950182	-0.00177756	5.94947e-06	5.47209e-05	0.198676	9.23713e-05	0.000523551	0.162878
ARHGAP9_P518_R	N	ARHGAP9	NM_032496.1	0.0233119	0.0526574	-0.0817981	0.142891	0.382999	-0.0714066	0.641154	0.724127	-0.00900883	0.213067	0.282617	-0.0459391	6.08733e-07	9.1668e-06	0.227842	0.147754	0.27257	0.11337
ARHGDIB_P148_R	N	ARHGDIB	NM_001175.4	0.0699028	0.127367	-0.0701407	0.117139	0.349369	-0.0786228	0.945228	0.95833	0.00305133	0.000275435	0.00132209	0.163049	0.434109	0.497606	0.040458	0.61739	0.759245	0.0285115
ARHGDIB_P342_F	N	ARHGDIB	NM_001175.4	0.59917	0.678206	0.00667392	0.816044	0.911595	-0.00995386	0.0430416	0.0903995	-0.0261785	0.151365	0.210786	0.0156291	0.000998405	0.00253479	0.0694119	0.933102	0.959278	-0.00297167
ARNT_P146_R	Y	ARNT	NM_178426.1	0.508634	0.59502	-0.00254726	0.39971	0.615096	-0.00281509	0.668229	0.745214	0.0097873	0.000123269	0.000800035	-0.036818	0.000228206	0.0008209	-0.0339224	2.14306e-05	0.000157499	-0.030324
ARNT_P238_R	Y	ARNT	NM_178426.1	0.328673	0.428194	-0.00493031	0.610778	0.77151	0.00588323	0.000313413	0.00152343	-0.0389796	0.000329122	0.00150905	-0.0538389	0.0130456	0.02254	-0.0528125	0.0730366	0.153677	-0.0387558
AR_P189_R	Y	AR	NM_001011645.1	0.00630759	0.0175834	-0.134161	0.082722	0.292767	-0.109138	0.405617	0.521055	-0.027705	0.126235	0.181212	-0.0627333	0.529185	0.587215	0.0457418	0.0658016	0.141161	0.131402
AR_P54_R	Y	AR	NM_001011645.1	0.0226908	0.0514058	-0.053055	0.860829	0.933674	-0.00992887	0.495141	0.601682	-0.022279	0.00988121	0.0204992	-0.0676765	0.56557	0.622289	0.0395569	0.411705	0.591213	-0.0166166
ASB4_E89_F	N	ASB4	NM_016116.1	0.396172	0.491932	-0.0408377	0.0971701	0.31756	-0.127043	3.42876e-09	4.38881e-07	0.27438	4.82707e-06	0.000105835	0.303026	0.00339595	0.00691801	0.051953	0.588158	0.7349	-0.0297463
ASB4_P391_F	N	ASB4	NM_016116.1	0.168512	0.258835	0.0494219	0.00604521	0.057166	-0.265072	2.35694e-07	6.24183e-06	0.252201	0.00157336	0.00469259	0.229971	0.525741	0.584672	0.0155146	0.909787	0.948698	-0.0052675
ASB4_P52_R	N	ASB4	NM_016116.1	0.000133268	0.000604831	0.0960048	0.0421656	0.203668	-0.219931	5.2665e-09	5.57935e-07	0.363366	3.71924e-06	9.67136e-05	0.41359	0.0115107	0.0202062	0.0538666	0.192333	0.335709	0.0285773
ASCL1_E24_F	Y	ASCL1	NM_004316.2	0.908019	0.932921	0.000468974	0.515796	0.70236	0.0057168	0.00745428	0.0204096	-0.0127769	0.00271778	0.00709951	-0.0176834	0.00552452	0.0105021	-0.0455442	8.34073e-05	0.000479826	-0.047099
ASCL1_P747_F	Y	ASCL1	NM_004316.2	0.450204	0.544499	-0.0459036	0.860199	0.933674	-0.0127274	0.308456	0.428053	0.0553028	0.00892233	0.0189291	-0.117447	0.000182429	0.000702284	-0.0955494	0.686862	0.817325	0.0171779
ASCL2_E76_R	Y	ASCL2	NM_005170.2	0.459229	0.551937	0.0296645	0.702964	0.842241	-0.00687813	4.84058e-05	0.000355748	-0.082654	0.00076121	0.0027128	-0.0935052	0.588397	0.645095	0.0394249	0.440626	0.615835	0.04158
ASCL2_P360_F	Y	ASCL2	NM_005170.2	0.198749	0.291296	0.0542437	0.524228	0.710703	0.00789586	0.188913	0.296024	-0.0345513	0.0629316	0.0993453	-0.0521003	0.336205	0.405984	0.0699718	0.959825	0.970567	0.00315865
ASCL2_P609_R	Y	ASCL2	NM_005170.2	0.133758	0.217871	0.111114	0.990173	0.994056	-0.000739512	0.493976	0.600774	-0.0208099	0.912421	0.938652	-0.00361486	0.0814928	0.115794	0.22032	0.0369057	0.0902661	0.221459
ATP10A_P147_F	Y	ATP10A	NM_024490.2	0.0159412	0.0389899	0.255627	0.280062	0.501571	-0.0318463	0.278759	0.399416	0.0605241	0.0280182	0.0496378	-0.0639118	2.19212e-08	6.122e-07	0.517162	0.115733	0.223266	0.141131
ATP10A_P524_R	Y	ATP10A	NM_024490.2	0.0448485	0.0890366	0.0564271	0.11015	0.337032	-0.158039	0.976429	0.982184	-0.00129918	0.388696	0.473088	-0.0632873	0.0243404	0.0392719	-0.254685	0.490828	0.659476	-0.0503832
AXIN1_P995_R	Y	AXIN1	NM_003502.2	2.20309e-08	2.19737e-07	0.362269	0.155881	0.389546	-0.117283	1.77618e-07	4.78634e-06	0.294904	0.311698	0.394048	0.0923758	4.24011e-07	6.85559e-06	0.509008	0.000937306	0.00394904	0.323847
AXL_E61_F	N	AXL	NM_021913.2	0.0439167	0.0876052	-0.0283499	0.0194912	0.123712	-0.0274371	0.00809167	0.021959	-0.0302513	0.00194835	0.00549292	-0.0488108	0.0855076	0.120351	-0.0318605	0.104833	0.206705	-0.0297985
AXL_P223_R	Y	AXL	NM_021913.2	0.0555152	0.105927	-0.0514904	0.0899878	0.30922	-0.0463686	0.263641	0.382753	0.0513009	0.077035	0.117972	-0.0503718	0.12468	0.169028	-0.0323713	0.306128	0.48227	0.0541773
B3GALT5_E246_R	N	B3GALT5	NM_033170.1	0.000321054	0.00133642	-0.276077	0.930094	0.961389	-0.00368477	0.482412	0.591311	0.0222568	6.68002e-07	4.27521e-05	0.189407	0.526052	0.584672	0.0224449	0.95701	0.969636	0.00400881
B3GALT5_P330_F	N	B3GALT5	NM_033170.1	0.00422937	0.0125654	-0.104904	0.364456	0.581917	-0.0126334	0.975345	0.981736	-0.000182509	0.000658166	0.00245374	0.0207311	1.21464e-05	9.56761e-05	0.0884661	1.9792e-07	4.53739e-06	0.0813304
BAX_E281_R	Y	BAX	NM_138765.2	0.278027	0.379263	-0.0537253	0.00110073	0.0162569	-0.15831	0.0437643	0.0914584	-0.0813485	0.00866159	0.0185496	-0.132312	0.742313	0.785257	0.0203359	0.680169	0.811133	0.0208632
BCAM_E100_R	Y	BCAM	NM_001013257.1	0.00517776	0.0149493	0.00961059	0.418047	0.628914	0.00337012	0.00861672	0.0231386	-0.00658733	0.00136366	0.00420597	-0.0104355	0.00203439	0.00450262	-0.0322239	2.49099e-05	0.000175512	-0.0327797
BCAM_P205_F	Y	BCAM	NM_001013257.1	0.108238	0.184317	0.0986008	0.722024	0.854413	-0.00299092	0.804807	0.851366	0.00592008	0.675433	0.736836	-0.0121192	0.000208779	0.000780255	-0.0823877	0.0331397	0.0819688	-0.061462
BCAP31_P1072_F	Y	BCAP31	NM_005745.6	0.752796	0.813719	-0.00178266	0.334755	0.555274	-0.0483743	0.000207235	0.00108454	0.0818733	0.00282868	0.00736417	0.095368	3.34934e-06	3.31908e-05	0.0981798	0.0219486	0.0586314	0.0619262
BCAP31_P1131_F	Y	BCAP31	NM_005745.6	0.402822	0.497775	-0.0152207	0.349211	0.568456	-0.0218633	0.000153441	0.000860166	0.0501727	0.00194899	0.00549292	0.059124	8.51551e-06	7.34543e-05	0.104904	0.0130222	0.0378828	0.0698561
BCL2A1_E425_F	N	BCL2A1	NM_004049.2	0.177642	0.270345	0.0678337	0.00105686	0.0157606	-0.21873	0.498698	0.604102	-0.038218	0.774781	0.825286	0.0213738	0.277074	0.342937	0.0950529	0.362091	0.543668	0.0618964
BCL2A1_P1127_R	Y	BCL2A1	NM_004049.2	0.0255939	0.0569017	-0.100863	0.0857885	0.300034	-0.0256865	0.265338	0.384853	-0.0249768	0.202065	0.270359	-0.0745589	0.000416483	0.00129909	0.0372321	0.00148536	0.00592599	0.0297886
BCL2L2_E172_F	N	BCL2L2	NM_004050.2	0.223629	0.319233	0.00859501	0.427958	0.634537	0.00956032	0.342133	0.459098	-0.00562495	0.0178377	0.0337008	-0.0176102	0.0141996	0.0242609	-0.0256411	0.000764403	0.00331673	-0.0295928
BCL2L2_P280_F	N	BCL2L2	NM_004050.2	0.574012	0.653098	-0.013269	0.467475	0.66547	0.0210693	1.07409e-05	0.000113	-0.0592984	0.000126303	0.000808338	-0.0747424	0.840522	0.86589	0.00481457	0.339962	0.517524	-0.0166649
BCL3_E71_F	Y	BCL3	NM_005178.2	0.881301	0.918995	-0.00281093	0.0779276	0.283642	-0.0289726	6.20924e-07	1.25492e-05	-0.0921764	0.000214067	0.00111083	-0.0980812	6.96359e-05	0.000342823	-0.120302	1.24919e-06	1.95792e-05	-0.118969
BCL3_P1038_R	Y	BCL3	NM_005178.2	3.58577e-12	6.97183e-11	0.695209	0.0540275	0.229244	-0.0192606	0.101517	0.180893	0.0451132	0.001969	0.00553917	-0.00968022	0.000460955	0.00139375	-0.0358234	5.83354e-06	5.70721e-05	-0.0341459
BCL6_P248_R	Y	BCL6	NM_138931.1	0.407946	0.503297	-0.0136249	0.930787	0.961458	0.00212174	0.054722	0.110451	-0.0486384	0.0188502	0.0353097	-0.0599451	0.00285098	0.00593875	-0.0662293	0.00530607	0.0178346	-0.0560034
BCR_P346_F	Y	BCR	NM_021574.1	2.94757e-11	4.76576e-10	0.437606	0.0639864	0.250722	-0.141414	0.618503	0.704763	0.0283597	0.0881076	0.13241	-0.141148	0.0906615	0.126596	0.197614	0.00244527	0.00927392	0.294001
BCR_P422_F	Y	BCR	NM_021574.1	0.00143699	0.00505083	0.146528	6.08632e-05	0.00158451	-0.35937	0.526134	0.625013	0.0273688	2.54223e-05	0.00030991	-0.371937	0.310464	0.378171	0.086473	0.793434	0.884409	-0.0222747
BDNF_E19_R	Y	BDNF	NM_170733.2	0.0032705	0.0101896	0.298831	0.595279	0.759426	-0.0299072	0.604141	0.692508	0.0348112	8.42818e-05	0.000625396	-0.112588	0.00068715	0.00185494	0.322023	0.497214	0.660657	0.0503352
BDNF_P259_R	Y	BDNF	NM_170733.2	0.0168174	0.0405382	0.197187	0.578687	0.746317	-0.0326832	0.981541	0.98668	0.00151017	2.6555e-07	2.26603e-05	-0.228776	0.00365641	0.00732236	0.308895	0.0309464	0.0781804	0.184008
BGN_E282_R	Y	BGN	NM_001711.3	0.931667	0.950858	0.00876766	0.0385208	0.195494	-0.21183	0.974809	0.981736	0.00300969	0.74314	0.795445	0.0379304	0.00274089	0.0057279	0.4145	0.0125103	0.0367416	0.282217
BGN_P333_R	N	BGN	NM_001711.3	1.42104e-05	8.06362e-05	-0.283256	0.000213173	0.00442478	-0.29376	0.00246402	0.0082987	0.152725	0.481506	0.561012	-0.0522446	0.111675	0.153155	0.195624	0.213339	0.364098	0.0947327
BIRC4_P122_R	Y	BIRC4	NM_001167.2	0.318482	0.418132	-0.119947	0.128171	0.363901	-0.169316	0.313012	0.431198	-0.104535	0.768277	0.818927	-0.0366362	0.691005	0.73861	-0.0256805	0.00441979	0.0154642	0.298053
BIRC4_P500_F	Y	BIRC4	NM_001167.2	0.0367268	0.0765568	-0.223431	0.113831	0.34287	-0.181582	0.415958	0.53154	-0.0916187	0.835418	0.875309	-0.0294797	0.359169	0.427661	-0.056944	0.008054	0.0253503	0.282324
BIRC5_E89_F	Y	BIRC5	NM_001168.2	0.556505	0.638489	0.00156963	0.0977599	0.318809	0.0112074	0.0501659	0.103152	-0.0141229	0.033957	0.058473	-0.0208619	9.72422e-05	0.000431688	-0.0367972	0.00449695	0.0156984	-0.0242104
BLK_P14_F	N	BLK	NM_001715.2	9.98491e-08	9.12906e-07	-0.442872	0.0132138	0.0935503	-0.191139	0.291918	0.413779	-0.0565429	0.00148342	0.00448546	-0.281776	0.00295279	0.00613732	-0.205008	0.715061	0.835235	0.0305308
BLK_P668_R	N	BLK	NM_001715.2	8.54081e-05	0.000403652	-0.206158	0.154833	0.389546	-0.0687891	0.027037	0.0608036	0.0255482	0.239512	0.313632	-0.0818242	0.0178648	0.0299239	0.0500469	0.578032	0.725967	0.0128476
BMP2_E48_R	Y	BMP2	NM_001200.1	0.00320172	0.00999562	0.255603	0.0135572	0.094654	-0.0113092	0.00263537	0.00867599	-0.016563	0.000360552	0.00159775	-0.0269866	2.5363e-05	0.00016165	-0.0591096	9.52353e-06	8.14601e-05	-0.0475229
BMP2_P1201_F	Y	BMP2	NM_001200.1	6.49016e-08	6.15363e-07	0.365188	6.59381e-05	0.00168802	-0.0779704	0.0701713	0.133892	0.0666075	7.07346e-05	0.00055929	-0.051914	0.00113013	0.00278185	-0.0972478	0.00478317	0.0165472	-0.0733273
BMP3_E147_F	Y	BMP3	NM_001201.1	0.260358	0.358663	0.0648116	0.884871	0.941897	-0.00138705	3.81609e-07	8.49494e-06	-0.0521802	0.000891653	0.0030777	-0.0478549	4.76887e-05	0.000258076	-0.105877	0.842769	0.912622	0.0133374
BMP3_P56_R	Y	BMP3	NM_001201.1	0.431373	0.525864	0.038768	0.589524	0.753962	0.00159795	0.000232918	0.00120055	-0.0128452	7.2595e-05	0.000565534	-0.0179515	9.75397e-05	0.000431761	-0.04475	0.396825	0.576654	0.0695073
BMP4_P123_R	Y	BMP4	NM_130851.1	9.61043e-06	5.55531e-05	0.350556	9.85496e-15	3.78431e-12	-0.368924	0.00024219	0.00123281	0.305277	0.621396	0.687655	-0.0246399	3.1501e-12	2.84621e-10	0.706159	0.115102	0.222666	0.191591
BMP4_P199_R	Y	BMP4	NM_130851.1	0.000494005	0.00195827	0.161739	5.31071e-07	2.9133e-05	-0.486385	6.8656e-05	0.000470784	0.274125	0.0023084	0.00631093	0.260919	6.98381e-08	1.55466e-06	0.425017	0.039528	0.0947192	0.192861
BMP6_P163_F	Y	BMP6	NM_001718.2	0.489175	0.576744	0.00684501	0.662298	0.81059	0.00327489	0.936926	0.952428	0.00131528	0.00701057	0.0154716	-0.0255688	0.00306688	0.00632313	-0.0356983	0.450318	0.622717	0.0410683
BMP6_P398_F	Y	BMP6	NM_001718.2	0.552594	0.634842	-0.00227783	0.423462	0.631769	0.00289368	0.000260024	0.00130062	-0.0186678	0.000651102	0.00244521	-0.0241054	0.0175274	0.029423	-0.0199704	0.539081	0.696408	0.0182961
BMPR1A_E88_F	Y	BMPR1A	NM_004329.2	0.074767	0.133693	-0.061002	0.616193	0.775162	-0.0217119	0.00504866	0.0149103	-0.109519	0.176098	0.240646	-0.0581769	0.387285	0.454099	0.0516158	0.332098	0.509634	-0.0651056
BMPR1A_P956_F	Y	BMPR1A	NM_004329.2	0.510681	0.596053	0.00228645	0.257302	0.489735	0.00837578	0.466351	0.576743	0.0261867	0.0106375	0.0216701	-0.0169176	1.77645e-05	0.000126913	-0.0467645	8.85792e-06	7.91033e-05	-0.0394664
BMPR2_E435_F	Y	BMPR2	NM_001204.5	0.315621	0.415583	-0.00205187	0.313954	0.535779	0.00617954	0.000191506	0.00103632	-0.00856955	0.000116375	0.000764406	-0.0129482	6.26836e-06	5.71296e-05	-0.0373806	0.345863	0.52391	-0.0171973
BMPR2_P1271_F	Y	BMPR2	NM_001204.5	0.00114103	0.00407586	0.232025	0.225119	0.451424	-0.0213672	0.0811374	0.150698	0.120729	0.00159393	0.00474471	-0.0664034	0.00502332	0.00969542	0.183667	0.80517	0.89231	-0.0106568
BRCA1_P835_R	Y	BRCA1	NM_007298.2	0.00552047	0.0156826	-0.195939	0.961715	0.974772	0.00312932	0.0167072	0.0407986	-0.131086	0.672045	0.734182	0.028926	0.0260421	0.0415765	0.185875	0.00790627	0.0249364	0.187818
BSG_P211_R	Y	BSG	NM_001728.2	1.73487e-23	3.80679e-21	0.76434	0.460591	0.659951	-0.0422336	6.86222e-10	1.50577e-07	0.553549	0.000594568	0.00231204	0.402524	0.0121564	0.0212184	-0.0392032	0.337126	0.513716	-0.0191045
BTK_E64_R	N	BTK	NM_000061.1	0.00018055	0.000795912	-0.344835	0.0607149	0.243494	-0.158903	0.471587	0.581814	-0.026081	0.0099026	0.0204992	0.0398016	0.0107613	0.019065	0.066096	0.918632	0.953391	0.00278882
BTK_P105_F	N	BTK	NM_000061.1	3.11451e-10	4.38889e-09	-0.311345	0.023509	0.140505	-0.168073	5.47586e-08	2.0026e-06	-0.185999	0.0176256	0.033341	-0.132889	0.374992	0.442387	0.0747558	0.426348	0.602457	-0.0649795
C20orf47_P225_R	Y	ERGIC3	NM_015966.2	0.0548789	0.105236	0.100312	0.644148	0.796481	-0.00255536	0.898248	0.924738	-0.00265128	2.49369e-06	8.25923e-05	-0.0324516	8.0642e-05	0.000381127	-0.0372117	1.16635e-05	9.68389e-05	-0.0305905
C4B_E171_F	N	C4B	NM_000592.4	0.565222	0.646449	-0.0326332	6.54175e-06	0.000241286	-0.337642	0.569814	0.66215	-0.0244768	0.727786	0.782402	0.0209133	0.0137014	0.0235669	0.153913	0.254775	0.418093	-0.0664123
C4B_P191_F	N	C4B	NM_000592.4	0.0323157	0.0690287	-0.0723986	4.00902e-06	0.000157894	-0.393094	0.000116057	0.000703691	0.092452	0.00216259	0.00598511	0.0980595	0.609316	0.662825	0.031634	0.873904	0.92673	0.00902904
CALCA_E174_R	Y	CALCA	NM_001033952.1	0.0193702	0.0453547	0.266634	0.649907	0.800656	0.0439116	0.236402	0.352196	0.0621965	0.300701	0.381717	-0.048376	0.00136631	0.00322871	0.369576	0.0725053	0.152768	0.151166
CALCA_P171_F	Y	CALCA	NM_001033952.1	0.197225	0.290448	0.115995	0.650012	0.800656	-0.0398148	0.285202	0.4064	-0.05271	0.0498371	0.0814879	-0.121909	0.0205457	0.033716	0.241755	0.0207605	0.0562402	0.143068
CALCA_P75_F	Y	CALCA	NM_001033952.1	0.055038	0.105409	0.142359	0.386024	0.60345	0.0559506	0.00228069	0.0077675	-0.0419625	4.34264e-05	0.00041793	-0.0667458	0.0706489	0.102278	0.159444	0.578522	0.725989	0.0310353
CAPG_E228_F	N	CAPG	NM_001747.2	0.162622	0.252821	-0.083052	0.698884	0.840915	-0.024417	0.0674929	0.130074	0.060569	0.831552	0.871853	-0.0109653	0.572163	0.628643	0.0332817	0.0936697	0.187829	-0.115139
CARD15_P302_R	N	CARD15	NM_022162.1	0.000963459	0.00352351	0.239119	6.30604e-12	1.38373e-09	-0.384073	0.437177	0.550414	0.0418614	0.0259248	0.0464108	-0.114023	0.0103093	0.0183871	0.132629	0.0477619	0.109333	-0.163074
CARD15_P665_F	N	CARD15	NM_022162.1	0.300973	0.401998	-0.0149058	0.0876815	0.302269	-0.0947197	0.104282	0.184324	-0.060542	0.0495356	0.0811159	-0.115168	2.18073e-05	0.00014376	0.178714	0.754803	0.862754	0.019548
CASP10_E139_F	N	CASP10	NM_001230.3	0.274397	0.374977	0.0695297	0.249697	0.48062	-0.113363	0.553764	0.649597	0.0357936	0.0139038	0.0272749	0.202357	0.915874	0.926735	-0.00847156	0.00737328	0.0234966	-0.259129
CASP10_P186_F	N	CASP10	NM_001230.3	0.327126	0.426904	0.0723696	0.0323167	0.177916	-0.232332	1.18174e-06	1.97299e-05	0.40611	0.00602742	0.0137975	0.245244	0.0256006	0.0410037	0.171569	0.919592	0.953742	-0.00875197
CASP10_P334_F	N	CASP10	NM_001230.3	0.449637	0.544242	0.0509307	0.00277868	0.0330857	-0.251394	7.4243e-05	0.000500164	0.301613	0.91111	0.937979	0.0111012	0.80584	0.838598	0.0195899	0.880539	0.929054	-0.00993652
CASP2_P192_F	Y	CASP2	NM_032982.2	0.396839	0.492334	0.00853033	0.734581	0.863436	0.00432583	0.187275	0.294728	-0.0115098	0.00375232	0.00934128	-0.0217687	0.757749	0.799016	0.0145647	0.720406	0.838291	0.0197703
CASP3_P420_R	Y	FLJ33167	NM_152683.1	0.882674	0.919128	-0.000511158	0.514142	0.701878	0.0032119	1.72598e-05	0.000162884	-0.0158992	1.91548e-05	0.00026037	-0.0222438	0.000103334	0.000452199	-0.0500278	9.28189e-07	1.57663e-05	-0.0492805
CASP6_P201_F	Y	CASP6	NM_001226.3	0.337556	0.435703	0.00691989	0.349999	0.568456	-0.00566336	0.000648826	0.00274544	-0.0179935	0.000163452	0.000933314	-0.0278996	0.762198	0.801555	-0.00786402	0.688305	0.817991	0.0260808
CASP6_P230_R	Y	CASP6	NM_001226.3	0.626882	0.705932	-0.00360832	0.711199	0.846318	0.00260183	1.44975e-08	8.56466e-07	-0.0541905	2.50979e-05	0.000308403	-0.0559439	0.918514	0.92853	0.00191779	0.332125	0.509634	0.0590069
CASP8_E474_F	N	CASP8	NM_001228.3	0.984733	0.986017	0.000844751	0.262069	0.493307	-0.0996836	0.0010634	0.00410906	0.0916877	0.000620906	0.00237833	0.131277	0.000563415	0.00159375	0.170108	0.533253	0.690621	0.0373489
CAV1_P130_R	Y	CAV1	NM_001753.3	1.71882e-06	1.16606e-05	0.550166	0.00792513	0.0689329	-0.0554448	0.204687	0.315661	0.0622328	0.000346812	0.00156218	-0.0491212	0.000408267	0.00128768	-0.0670474	0.0108812	0.0330226	-0.0483288
CAV1_P169_F	Y	CAV1	NM_001753.3	5.52651e-06	3.35523e-05	0.508552	0.000953385	0.0147919	-0.0792453	0.235278	0.351201	0.0671639	0.111889	0.163212	-0.0675218	0.648386	0.699383	-0.0125797	3.47685e-05	0.000230191	-0.0722777
CAV2_E33_R	Y	CAV2	NM_198212.1	3.33645e-05	0.000169695	0.466088	0.0064763	0.0592077	-0.0421482	0.0976009	0.175545	0.0875578	0.00359847	0.00904624	-0.0190564	0.00135869	0.00321564	0.282349	0.0889952	0.180577	0.150803
CCKAR_E79_F	N	CCKAR	NM_000730.2	7.29875e-08	6.79448e-07	0.27948	0.00163386	0.0220141	0.217816	0.319057	0.435619	0.0761663	0.00217357	0.00600468	-0.276234	7.84062e-06	6.92138e-05	0.493762	0.00702567	0.0225762	0.246493
CCKAR_P270_F	N	CCKAR	NM_000730.2	2.61914e-07	2.08446e-06	0.185335	0.000478013	0.00853753	0.158979	0.331492	0.450072	-0.0418458	0.000416536	0.00179719	-0.285023	0.39962	0.465013	-0.104767	0.931756	0.959278	-0.00667988
CCKBR_P361_R	Y	CCKBR	NM_176875.2	5.06308e-11	7.77689e-10	0.577522	0.000134235	0.00303214	-0.0213755	0.0939378	0.170554	0.0059058	0.4858	0.562737	-0.00165842	5.29557e-06	4.9297e-05	-0.102085	0.0121246	0.0358142	-0.0796895
CCKBR_P480_F	Y	CCKBR	NM_176875.2	1.93749e-14	4.72379e-13	0.649581	0.436411	0.638407	-0.0105318	0.0042827	0.0130262	-0.0172217	0.0145988	0.0284928	-0.0215251	0.0332622	0.0519215	-0.0241623	0.344367	0.52216	-0.0170552
CCL3_E53_R	N	CCL3	NM_002983.1	1.34531e-08	1.45521e-07	-0.508087	0.00248084	0.0304845	-0.196003	0.00844321	0.0227655	-0.149683	0.00631832	0.0142301	-0.181014	0.0106521	0.0189152	-0.23732	0.0478373	0.109342	-0.143752
CCL3_P543_R	N	CCL3	NM_002983.1	0.00527545	0.015146	-0.119743	0.0242517	0.143825	-0.161567	0.308499	0.428053	-0.0435182	0.0474422	0.078188	-0.0960644	0.00129724	0.00310853	0.131422	0.00123994	0.00502519	0.120371
CCNA1_E7_F	Y	CCNA1	NM_003914.2	1.00546e-20	5.78959e-19	0.738362	0.277587	0.499296	-0.0516986	0.872367	0.904153	-0.00839045	0.00943235	0.0197925	-0.064498	0.00350566	0.00708513	0.35455	0.13074	0.246098	0.0954006
CCNA1_P216_F	Y	CCNA1	NM_003914.2	6.95575e-05	0.000334922	0.330408	0.0386167	0.195494	-0.0192327	0.0248991	0.0570793	-0.011413	0.000167232	0.000951364	-0.0194496	0.424864	0.488833	0.0499946	0.926556	0.95808	0.0030267
CCNC_P132_R	Y	CCNC	NM_001013399.1	0.00707154	0.0193146	0.0900541	0.255358	0.487242	-0.00311541	0.220837	0.334522	0.0150037	0.202332	0.270481	-0.00584018	8.12545e-05	0.000382843	-0.0295541	2.11773e-05	0.000156386	-0.0256837
CCND1_E280_R	Y	CCND1	NM_053056.1	0.0627839	0.116892	0.191272	0.211203	0.442614	-0.0123257	0.00138691	0.00510863	-0.0132526	0.0109236	0.0221156	-0.0140448	0.00262727	0.00553884	-0.0544299	0.000130178	0.00069914	-0.0498889
CCND1_P343_R	Y	CCND1	NM_053056.1	9.42836e-08	8.67184e-07	0.593018	0.162289	0.39122	-0.0507832	0.0972815	0.175177	0.12062	0.000444014	0.00187364	-0.0342874	0.000103701	0.000452515	-0.0462632	7.60476e-06	7.0367e-05	-0.0392293
CCND2_P887_F	Y	CCND2	NM_001759.2	4.86665e-22	5.75014e-20	0.72694	0.00949555	0.0763621	-0.036356	0.000539201	0.00237992	0.207062	0.000259867	0.00128346	-0.0246012	0.00163267	0.00373183	0.429073	0.525877	0.684983	0.0355739
CCND2_P898_R	Y	CCND2	NM_001759.2	2.67572e-19	1.2088e-17	0.71239	0.0200822	0.125903	-0.0191373	0.00279341	0.00912909	0.210699	0.000235168	0.00118979	-0.0226676	0.00562144	0.0106599	0.401091	0.0689733	0.146735	-0.0388985
CCND3_P435_F	Y	CCND3	NM_001760.2	0.335561	0.433644	-0.00620275	0.661459	0.810209	-0.00270865	0.136427	0.230277	-0.0102101	0.044164	0.0738149	-0.0195897	0.00166412	0.00379242	-0.0545903	0.0833077	0.171529	-0.0321429
CCNE1_P683_F	Y	CCNE1	NM_057182.1	0.0175831	0.0420025	0.119181	0.0516209	0.223746	-0.0234617	0.451998	0.563988	0.0168028	0.705449	0.76277	0.012768	0.0127353	0.0220549	-0.0298926	0.00139916	0.00561124	-0.0318738
CCR5_P630_R	N	CCR5	NM_000579.1	0.000691293	0.00260251	-0.154299	0.0132164	0.0935503	-0.146458	0.000640442	0.00271746	-0.124545	0.00212489	0.00591274	-0.140056	0.143595	0.191294	-0.14014	0.461222	0.631969	-0.0635406
CD1A_P414_R	N	CD1A	NM_001763.1	0.0013561	0.00479948	-0.134298	0.117542	0.349892	-0.083872	0.043081	0.0903995	-0.041759	0.066372	0.103605	-0.0545024	0.172539	0.226706	0.0283408	0.775786	0.872334	0.0109823
CD1A_P6_F	N	CD1A	NM_001763.1	6.69336e-05	0.000324322	-0.35084	0.0229879	0.138469	-0.192883	0.0057865	0.0165822	-0.153523	0.0152518	0.0295792	-0.178542	0.103353	0.143147	-0.0808706	0.493116	0.659476	-0.0494665
CD2_P68_F	N	CD2	NM_001767.2	0.154515	0.242922	-0.09226	0.0125308	0.0903627	-0.168197	0.63951	0.722801	-0.00633483	0.0278139	0.0493328	-0.090636	0.0034512	0.00702075	0.0835092	0.318522	0.496197	-0.0541558
CD34_E20_R	N	CD34	NM_001025109.1	0.0627219	0.116892	0.0551288	0.424953	0.632489	-0.0134165	0.354059	0.468419	-0.0263828	0.00798919	0.0172837	-0.0675735	9.29015e-05	0.00042218	-0.0712772	2.97798e-06	3.51859e-05	-0.0639394
CD34_P339_R	N	CD34	NM_001025109.1	0.0234602	0.0529146	-0.212477	6.59766e-06	0.000241286	-0.488539	0.00439996	0.0133301	0.0813097	0.150813	0.210306	0.0576987	0.00077325	0.00204815	0.140471	0.0118311	0.0351499	0.0843188
CD34_P780_R	N	CD34	NM_001025109.1	0.000509102	0.00200508	-0.310501	0.00629172	0.0585702	-0.258155	0.839143	0.879811	0.0110237	0.000940116	0.00319473	-0.244475	0.102134	0.141714	0.07809	0.290416	0.463217	-0.0747007
CD40_E58_R	Y	CD40	NM_152854.1	1.82796e-09	2.28272e-08	0.457069	0.12575	0.361804	-0.0404462	2.90264e-05	0.00023842	0.230751	0.579864	0.650645	-0.0256073	7.5083e-10	3.60398e-08	0.547408	0.492417	0.659476	0.054696
CD40_P372_R	Y	CD40	NM_152854.1	3.58973e-09	4.2414e-08	0.436611	3.78167e-06	0.000152859	-0.163439	6.18663e-06	7.30974e-05	0.270277	0.939227	0.956033	-0.0049271	4.01886e-09	1.34195e-07	0.480577	0.162465	0.293929	0.131289
CD44_E26_F	Y	CD44	NM_001001389.1	0.196511	0.289675	0.104665	0.873476	0.938386	-0.000615585	0.0269103	0.0606075	-0.0120044	0.000574211	0.00224997	-0.0199485	0.263949	0.328015	0.105277	1.4619e-05	0.000113408	-0.0697977
CD44_P87_F	Y	CD44	NM_001001389.1	0.121504	0.202199	0.114988	0.849431	0.92863	0.00502775	6.94337e-06	8.0188e-05	-0.0483328	4.46938e-06	0.000104015	-0.061254	0.832827	0.859692	-0.00790664	0.874323	0.92673	0.00691643
CD81_P211_F	Y	CD81	NM_004356.3	6.2444e-06	3.74664e-05	0.422923	0.883505	0.941897	-0.00844558	0.00108927	0.00418278	0.223872	0.00445181	0.0108367	0.175892	0.516242	0.576271	-0.0583582	0.934873	0.959278	-0.00707661
CD81_P272_R	Y	CD81	NM_004356.3	5.86351e-19	2.50176e-17	0.512052	0.141066	0.381768	0.129084	0.00747147	0.0204202	0.200643	0.374282	0.461025	0.0579109	2.55287e-05	0.000162034	0.509988	1.40882e-08	6.98049e-07	0.48996
CD82_P557_R	Y	CD82	NM_002231.3	2.68853e-26	2.06479e-23	0.720926	0.383786	0.600957	-0.0358231	3.90102e-06	5.07794e-05	0.417807	0.0736085	0.113483	0.111631	0.0421642	0.0642502	-0.0404776	0.0519662	0.117038	-0.0458426
CD86_E65_F	N	CD86	NM_006889.2	0.0409728	0.0831855	-0.161948	0.0664752	0.257843	-0.159459	7.51058e-06	8.49513e-05	0.256364	0.166056	0.228346	0.114329	0.407608	0.471805	0.0680814	0.00750553	0.0238192	-0.229276
CD86_P3_F	N	CD86	NM_006889.2	0.139858	0.22481	-0.099183	0.197745	0.431109	-0.10566	0.00764832	0.0208665	0.154045	0.122714	0.177146	0.14124	0.400355	0.465515	0.0753514	0.859443	0.921062	0.0155636
CD9_E14_R	Y	CD9	NM_001769.2	0.00157286	0.00540473	0.375025	0.317307	0.537357	-0.0131038	0.0258267	0.0585635	0.17825	0.000557408	0.00221472	-0.0325143	0.000298796	0.000997719	-0.0625936	1.45162e-06	2.14393e-05	-0.062139
CD9_P504_F	Y	CD9	NM_001769.2	0.000445026	0.00180836	0.386184	0.95628	0.973943	0.00340651	0.00364886	0.0114381	0.223671	0.0661175	0.103313	-0.15716	0.00409546	0.00809605	0.394512	0.0264139	0.0687657	0.255489
CD9_P585_R	Y	CD9	NM_001769.2	0.0056033	0.0158795	0.294856	0.656648	0.806244	-0.0366752	0.838693	0.879811	0.0112362	0.0486752	0.0798773	-0.147163	0.0841452	0.118684	0.133557	0.228945	0.38543	-0.110493
CDC25B_E83_F	Y	CDC25B	NM_004358.3	0.368719	0.466518	0.00539884	0.266265	0.494539	0.00334208	0.287138	0.408752	0.0527163	1.30319e-05	0.00020851	-0.0176569	5.16761e-05	0.000275606	-0.0569675	0.507773	0.670667	-0.0202783
CDC25B_P11_R	Y	CDC25B	NM_004358.3	0.259836	0.358266	0.0185939	0.83915	0.921985	0.000788738	0.317258	0.435027	0.0545021	0.000920542	0.00314212	-0.0186241	1.19428e-05	9.45574e-05	-0.0566535	0.939268	0.960086	-0.00280175
CDC25C_E168_R	Y	CDC25C	NM_022809.1	5.20946e-07	3.94174e-06	-0.0790549	0.694991	0.839235	-0.0160354	6.7405e-05	0.000469817	-0.116009	0.00016082	0.000924807	-0.11951	5.84825e-05	0.000303477	-0.13904	0.000227495	0.00113821	-0.114533
CDH11_E102_R	Y	CDH11	NM_001797.2	0.981266	0.983853	-8.99162e-05	0.746574	0.870719	-0.00116309	0.351999	0.4669	0.0578671	0.00077618	0.00274703	-0.0258905	0.0002038	0.000768286	-0.0263334	6.01589e-05	0.000360953	-0.0207826
CDH11_P203_R	Y	CDH11	NM_001797.2	0.154082	0.242738	-0.00776973	0.633201	0.787945	-0.00294635	0.427486	0.540872	0.0420513	0.113375	0.16491	-0.019952	9.59819e-05	0.000431077	-0.0407319	1.663e-06	2.35095e-05	-0.0381646
CDH11_P354_R	Y	CDH11	NM_001797.2	0.116474	0.19531	-0.0317091	0.537936	0.716005	-0.0162425	0.69882	0.772221	-0.024939	0.00555664	0.0129711	-0.11346	0.000146754	0.000601104	-0.116243	0.00606709	0.0200841	-0.0850624
CDH13_E102_F	Y	CDH13	NM_001257.3	0.167394	0.258186	0.112998	0.636426	0.790259	0.0154864	0.0811267	0.150698	0.110196	8.54858e-05	0.000628259	-0.0455604	0.00363467	0.00730577	-0.0303397	0.0143954	0.0412525	-0.0235678
CDH13_P88_F	Y	CDH13	NM_001257.3	0.00723205	0.0195227	0.295755	0.600272	0.762975	0.0344657	0.006544	0.0183658	0.237407	0.00520827	0.0123265	-0.116351	0.000443473	0.00135766	-0.145657	0.0030361	0.0111833	-0.106966
CDH17_E31_F	N	CDH17	NM_004063.2	0.738276	0.801979	0.002614	0.539411	0.716726	-0.0146925	0.351408	0.466519	-0.043182	0.0876652	0.132082	-0.0930889	0.000568063	0.00159807	0.0532582	0.000559399	0.00252717	0.0473247
CDH17_P376_F	N	CDH17	NM_004063.2	0.669001	0.744627	-0.00383617	0.260562	0.49228	-0.0204124	0.12043	0.207144	0.0215362	0.000123615	0.000800035	0.0497385	0.0872665	0.122524	0.0439875	0.95818	0.970181	0.00355336
CDH17_P532_F	N	CDH17	NM_004063.2	0.211151	0.304988	-0.00577725	0.208233	0.439666	-0.0195883	0.236156	0.352171	-0.00953516	0.050614	0.0822678	0.00824666	0.00131881	0.00314549	0.0607118	0.829429	0.905629	0.0106032
CDH1_P45_F	Y	CDH1	NM_004360.2	0.3033	0.403699	0.0577894	0.873433	0.938386	0.00258481	0.0316289	0.0695021	-0.0360851	1.9657e-05	0.000264852	-0.0618456	0.173709	0.227472	0.0835365	0.127305	0.241408	-0.0389992
CDH1_P52_R	Y	CDH1	NM_004360.2	0.0530016	0.102274	0.139143	0.859569	0.933674	0.00293701	0.00395585	0.0122012	-0.0370805	0.0108114	0.021966	-0.0450521	0.00677655	0.0125862	0.315449	0.069811	0.148107	0.142219
CDH3_E100_R	Y	CDH3	NM_001793.3	1.20138e-06	8.78724e-06	0.494904	0.0526502	0.226529	0.19488	2.32428e-05	0.000202114	-0.0852353	0.00188767	0.00539211	-0.0914414	3.82374e-14	5.33934e-12	0.697213	0.505607	0.669493	0.0518524
CDH3_P87_R	Y	CDH3	NM_001793.3	5.08167e-06	3.12218e-05	0.50106	0.00135757	0.0194881	0.383124	3.99768e-06	5.16003e-05	-0.206695	0.000175477	0.000981318	-0.234901	4.59745e-16	1.17695e-13	0.743979	0.0724689	0.152768	0.164818
CDK10_E74_F	Y	CDK10	NM_052987.2	0.589962	0.669263	-0.0016834	0.920458	0.961048	-0.000322015	0.0130069	0.0331319	-0.0095848	0.00242601	0.00652642	-0.0146321	0.000323346	0.00106579	-0.0567627	1.34849e-06	2.07128e-05	-0.0566666
CDK10_P199_R	Y	CDK10	NM_052987.2	0.000854271	0.00316867	-0.121446	0.155244	0.389546	-0.0742627	0.999695	0.999695	1.41443e-05	0.0205688	0.0378367	-0.0756976	0.46114	0.523125	0.064279	0.097074	0.194055	0.119895
CDK2_P330_R	N	CDK2	NM_052827.1	0.787314	0.843904	0.0034539	0.924501	0.961048	0.00194387	2.86388e-07	6.8733e-06	-0.0669958	0.000244884	0.00122124	-0.0658286	0.0286255	0.0451889	-0.0461434	0.000887108	0.00378654	-0.0494723
CDK6_E256_F	Y	CDK6	NM_001259.5	0.743707	0.805595	0.0046672	0.127965	0.363901	-0.0142753	1.79458e-09	2.50589e-07	-0.0576643	1.65889e-06	7.01862e-05	-0.0650122	1.52429e-06	1.87305e-05	-0.181044	5.09931e-10	5.59468e-08	-0.176704
CDK6_P291_R	Y	LOC442597	XM_499529.2	0.0540324	0.103872	0.142626	0.526549	0.710703	-0.00352869	0.0062881	0.0178201	-0.00967925	0.000102331	0.000708019	-0.0178286	0.000490594	0.00146606	-0.0277515	3.8003e-05	0.000248394	-0.0249374
CDKN1A_E101_F	Y	CDKN1A	NM_000389.2	0.00154447	0.00534304	0.261151	0.0455326	0.211293	-0.0116432	0.581713	0.671308	0.0163824	0.00186423	0.00534408	-0.0245407	0.000159805	0.000637559	-0.0645362	1.10116e-06	1.7437e-05	-0.0616258
CDKN1A_P242_F	Y	CDKN1A	NM_000389.2	1.13587e-07	1.02029e-06	0.548478	0.671612	0.818655	0.0199125	0.184628	0.291158	0.0354334	0.267903	0.344641	0.0604366	0.00757114	0.0138774	-0.228611	0.000289814	0.00140872	-0.226251
CDKN1B_P1161_F	N	CDKN1B	NM_004064.2	0.233377	0.328869	0.0683181	0.314275	0.535779	-0.0111778	0.149594	0.249215	0.0709485	0.000415313	0.00179696	-0.0766869	0.0018681	0.0041767	0.228155	0.0902051	0.18279	0.0586079
CDKN1C_P626_F	Y	CDKN1C	NM_000076.1	3.70306e-15	9.97878e-14	0.58003	0.0534902	0.228418	-0.0221503	0.0362417	0.0781843	0.0866718	0.736304	0.789778	0.016951	0.404295	0.469741	0.0297684	0.790558	0.883125	-0.00645113
CDKN1C_P6_R	Y	CDKN1C	NM_000076.1	0.0356697	0.0748794	0.158166	0.0919297	0.311117	-0.0230422	0.836991	0.879811	-0.00744616	0.0222278	0.0405375	-0.0440179	2.55254e-06	2.7227e-05	-0.194017	7.53958e-07	1.40847e-05	-0.18622
CDKN2A_E121_R	Y	CDKN2A	NM_058195.2	0.0698261	0.127367	0.10465	0.491584	0.683323	-0.00632674	0.00155964	0.00566339	-0.0189512	4.13306e-05	0.000415217	-0.0285828	0.000216209	0.000798309	-0.0573239	3.09489e-05	0.000211278	-0.0592986
CDKN2B_E220_F	Y	CDKN2B	NM_004936.3	0.0178147	0.0423753	0.219273	0.462592	0.661584	-0.0119514	1.72852e-05	0.000162884	-0.0403053	7.79175e-05	0.000589563	-0.0504852	2.90724e-06	2.99699e-05	-0.178742	1.3545e-05	0.00010561	-0.164171
CDKN2B_seq_50_S294_F	Y	CDKN2B	NM_004936.3	0.0167704	0.0405382	0.276239	0.982061	0.991094	0.000432648	0.0690529	0.132086	-0.0134895	0.543107	0.616565	-0.00728529	0.558072	0.61492	0.0372567	0.829571	0.905629	-0.00534139
CDM_seq_21_S260_R	N	.	.	0.000475328	0.00190628	-0.290876	0.00351363	0.0385648	-0.259304	0.379221	0.492568	0.0704366	0.924775	0.946146	-0.00886534	0.814815	0.845611	0.0266727	0.0506317	0.114705	-0.129571
CEACAM1_E57_R	N	CEACAM1	NM_001712.3	0.360146	0.458313	-0.07956	4.83424e-16	2.47513e-13	-0.390808	0.279454	0.399666	-0.0844524	2.40849e-07	2.2369e-05	-0.392665	7.08758e-06	6.40383e-05	0.283185	0.720048	0.838291	-0.0323173
CEACAM1_P44_R	N	CEACAM1	NM_001712.3	0.366219	0.463737	-0.0513318	0.000101842	0.00248301	-0.397507	0.533435	0.631297	0.0109827	0.132476	0.188935	-0.083926	0.000363511	0.00116566	0.126046	0.235093	0.393359	0.0455374
CEBPA_P1163_R	Y	CEBPA	NM_004364.2	0.419088	0.513333	0.0033295	0.427797	0.634537	0.00492256	0.00343429	0.0108764	0.162365	0.00605122	0.0138108	-0.0328333	0.0367053	0.0566626	0.216318	2.37328e-06	3.0378e-05	-0.0635472
CEBPA_P706_F	Y	FLJ12355	XR_000538.1	0.128145	0.210513	-0.0137463	0.27229	0.495051	-0.0148593	0.356772	0.471197	0.0558319	0.00161935	0.00480177	-0.0653387	0.405278	0.470172	0.0720085	0.000662638	0.00291637	-0.0642323
CFTR_P115_F	Y	CFTR	NM_000492.2	0.000160262	0.000713513	0.154049	0.793948	0.898014	-0.00111312	0.0330508	0.0724195	-0.00868918	0.00383746	0.00950701	-0.015506	0.00157344	0.00361257	0.368433	0.00398784	0.0141422	-0.0320714
CFTR_P372_R	Y	CFTR	NM_000492.2	6.16175e-07	4.61681e-06	0.521838	0.885214	0.941897	0.00733593	5.53248e-05	0.000402743	-0.101369	0.00163095	0.00482686	-0.112827	1.98244e-07	3.62504e-06	0.665631	0.29259	0.466202	0.0963431
CHD2_P451_F	N	CHD2	NM_001271.1	0.315745	0.415583	-0.0190419	0.204715	0.439164	-0.0460427	0.508139	0.610304	0.00540933	0.434674	0.518598	-0.0288296	0.000525309	0.00153117	0.0668737	0.639892	0.77944	0.0222858
CHD2_P667_F	N	CHD2	NM_001271.1	0.777375	0.834998	-0.00236875	0.217424	0.444692	-0.0400453	0.239021	0.355752	0.00840351	1.83888e-05	0.000252189	0.0359409	0.00865967	0.0156854	0.115147	0.00987324	0.0305752	0.141622
CHFR_P501_F	Y	CHFR	NM_018223.1	0.612633	0.691407	-0.00179512	0.813848	0.909804	0.000817903	0.000594714	0.00257146	-0.0324632	0.000304602	0.0014135	-0.0459568	0.0035381	0.00714129	-0.0666098	0.000245418	0.00120821	-0.0619427
CHFR_P635_R	Y	CHFR	NM_018223.1	0.974439	0.980182	0.000100501	0.0255635	0.148733	-0.00591438	0.918899	0.941155	-0.000560183	0.00245722	0.0065869	-0.00952709	2.36127e-05	0.000153034	-0.0889921	6.75044e-08	1.95635e-06	-0.0844027
CHGA_E52_F	Y	CHGA	NM_001275.2	0.262363	0.360779	0.00963234	0.0820493	0.292292	0.0322302	1.86022e-08	9.85276e-07	-0.0368992	0.0207332	0.0380936	-0.0305075	0.226464	0.286078	-0.0403566	0.0308695	0.0781712	-0.0577743
CHGA_P243_F	Y	CHGA	NM_001275.2	1.03111e-07	9.37154e-07	-0.213912	0.0334945	0.179886	-0.109561	0.0255994	0.0581667	-0.0778861	0.00256024	0.00678022	-0.106611	0.788225	0.824175	0.0243193	0.888099	0.933935	-0.0101019
CHI3L2_E10_F	N	CHI3L2	NM_001025199.1	7.45751e-06	4.40567e-05	-0.251636	0.0397902	0.196868	-0.0853716	0.793116	0.84307	-0.00752984	0.421274	0.50474	-0.0330798	0.000664957	0.00181095	0.141163	0.0216824	0.0581387	-0.187875
CHI3L2_P226_F	N	CHI3L2	NM_001025199.1	1.59698e-10	2.31412e-09	-0.514806	0.126489	0.361804	-0.0945818	0.000244413	0.00123493	-0.169227	0.000820944	0.00287237	-0.182112	0.000541707	0.00155599	0.0986783	0.39733	0.576842	-0.0602125
CLDN4_P1120_R	N	CLDN4	NM_001305.3	0.001564	0.00538632	-0.197626	0.0822251	0.292292	-0.0823738	4.83415e-08	1.81104e-06	0.0681172	3.94205e-08	6.48675e-06	0.0915715	0.14528	0.193204	0.0731496	0.201486	0.348517	0.0759396
CLDN4_P431_R	Y	CLDN4	NM_001305.3	0.018827	0.0444895	-0.130705	0.135294	0.372477	-0.0813216	0.341873	0.459098	0.0161065	0.00911059	0.019196	0.0499909	0.000808643	0.00212321	0.14313	0.705479	0.828688	-0.0278033
CLK1_P538_F	N	CLK1	NM_004071.2	0.00319394	0.00999164	0.229049	0.101421	0.32409	-0.0371873	0.349665	0.46509	0.0442396	0.709992	0.765834	0.0201508	0.00977541	0.0175205	0.200219	0.389031	0.570183	0.0427354
COL18A1_P365_R	Y	COL18A1	NM_130444.1	6.15093e-06	3.70503e-05	0.46189	0.00510284	0.0505675	-0.0229165	0.291677	0.413779	0.0481807	0.00042754	0.00182417	-0.0395819	0.624985	0.678429	0.023428	0.760936	0.864929	0.0176683
COL18A1_P494_R	Y	COL18A1	NM_130444.1	1.40609e-10	2.07669e-09	0.611623	0.000578639	0.00968061	-0.0744223	0.958574	0.969302	0.00398444	6.47642e-05	0.000531228	-0.170871	1.84288e-06	2.17743e-05	0.556594	0.416929	0.595158	0.0670316
COL1A1_P117_R	Y	COL1A1	NM_000088.2	1.64022e-07	1.36923e-06	0.5052	0.763036	0.878728	0.0207138	0.055756	0.111949	0.134137	0.445561	0.528073	-0.0478828	0.000173688	0.000676794	-0.174926	0.288815	0.461623	-0.05107
COL1A1_P5_F	Y	COL1A1	NM_000088.2	1.57404e-09	2.01477e-08	0.638987	0.315807	0.537017	-0.0407504	0.0205836	0.048566	0.188174	0.503428	0.580094	-0.0378969	0.948806	0.955024	0.00294602	0.211002	0.360511	-0.0302648
COL1A2_E299_F	Y	COL1A2	NM_000089.3	8.80543e-06	5.14264e-05	0.555061	0.887178	0.941897	0.00689014	0.317972	0.435027	0.0641685	0.0270044	0.0482312	-0.204409	3.35258e-05	0.00020027	0.432697	0.413994	0.593186	-0.0299498
COL1A2_P407_R	N	COL1A2	NM_000089.3	2.17136e-18	8.33801e-17	0.507014	0.1578	0.389546	0.131494	0.507718	0.610304	0.0221185	0.0730656	0.112906	0.0501178	1.38094e-05	0.000105006	0.411943	0.0299481	0.0762857	0.197916
COL1A2_P48_R	Y	COL1A2	NM_000089.3	6.82438e-10	9.44347e-09	0.657463	0.881205	0.941897	0.0087132	0.0371006	0.0798131	0.126489	0.136951	0.194415	-0.144224	0.307537	0.3752	0.0928516	0.772126	0.870767	0.0110514
COL4A3_E205_R	Y	COL4A3	NM_031366.1	0.14876	0.23532	0.0369515	0.519811	0.705951	0.00161533	0.000290207	0.00143331	-0.0123998	0.00173423	0.00507387	-0.0141907	0.604872	0.658925	-0.00814133	2.55846e-07	5.53492e-06	-0.0357506
COL4A3_P545_F	Y	COL4A3	NM_031366.1	0.0423937	0.08512	0.12316	0.160028	0.389546	-0.00479219	0.00246908	0.0082987	-0.0157827	0.00168387	0.00495485	-0.0211741	0.000267779	0.00092429	-0.0492641	5.18069e-06	5.16723e-05	-0.0470725
COL6A1_P283_F	Y	COL6A1	NM_001848.1	0.531636	0.615832	0.00218237	0.301967	0.521148	0.0050783	0.010991	0.0287602	-0.0066445	0.0116891	0.0233992	-0.00859107	0.000663845	0.00181095	-0.0342534	1.17691e-05	9.719e-05	-0.0322887
COL6A1_P425_F	Y	COL6A1	NM_001848.1	0.146795	0.232791	0.0180275	0.272342	0.495051	0.0171584	0.219962	0.333525	-0.0189548	0.00625118	0.0141411	-0.0331394	1.4422e-05	0.000108589	-0.0642432	5.37016e-08	1.76096e-06	-0.0596678
COMT_E401_F	N	TXNRD2	NM_145748.1	0.856337	0.900465	0.00716628	0.155239	0.389546	-0.0310934	0.115734	0.201088	-0.0196876	0.0167693	0.0319575	0.132338	0.0150591	0.0255307	-0.0839994	0.0998617	0.198347	-0.0606899
COPG2_P298_F	Y	COPG2	NM_012133.2	0.343087	0.439997	0.00238021	0.0381823	0.195493	0.00689118	0.000525314	0.00233203	-0.0116651	5.29779e-06	0.000108787	-0.0193264	0.0203636	0.0335466	-0.0680478	0.00530626	0.0178346	-0.0580108
CPA4_E20_F	N	CPA4	NM_016352.2	0.122648	0.203441	0.111413	0.489908	0.682042	0.0602053	0.270267	0.390527	0.0705325	0.0657734	0.10288	0.158589	0.922727	0.931214	-0.0104613	0.862459	0.922519	-0.0176188
CPA4_P1265_R	N	CPA4	NM_016352.2	0.0136487	0.0340711	-0.0335504	0.191837	0.422756	-0.0250614	0.00118226	0.00447277	-0.0434455	0.394253	0.477958	0.00806843	0.00417436	0.00824141	0.0378268	0.931611	0.959278	0.00254321
CPA4_P961_R	N	CPA4	NM_016352.2	0.0674949	0.12401	-0.0251879	0.207271	0.439666	-0.0186276	0.0386167	0.082727	0.014724	0.000649491	0.00244514	0.0373867	4.78852e-05	0.000258076	0.123533	1.34865e-05	0.00010561	0.100274
CPNE1_P138_F	Y	CPNE1	NM_152927.1	0.960178	0.96901	0.000365741	0.10152	0.32409	-0.00725606	1.83735e-06	2.71845e-05	-0.0323877	1.71228e-05	0.000248119	-0.0401308	1.63355e-05	0.000118736	-0.0445572	0.242904	0.402916	-0.0235025
CREB1_P819_F	Y	CREB1	NM_134442.2	0.000128663	0.000589929	0.354842	0.193291	0.424742	-0.0480273	0.00036281	0.00172531	0.209828	0.466952	0.547739	0.0451512	0.942031	0.950072	0.00521935	0.0039959	0.0141422	-0.181223
CREBBP_P712_R	Y	CREBBP	NM_004380.1	4.66887e-11	7.24382e-10	0.0855523	0.389837	0.606677	-0.0403921	0.18184	0.287353	0.0347262	0.107605	0.158032	0.0478849	1.98915e-05	0.00013458	0.189445	4.27401e-08	1.60993e-06	0.177963
CRIP1_P274_F	Y	CRIP1	NM_001311.3	1.50959e-17	5.15275e-16	0.52461	0.902263	0.951838	-0.00640879	5.38911e-05	0.000394175	0.243259	0.60415	0.675092	0.0388367	4.60667e-09	1.5055e-07	0.581156	0.394341	0.575221	0.0721279
CRIP1_P874_R	Y	CRIP1	NM_001311.3	6.7591e-07	5.01545e-06	0.254593	0.771137	0.883271	0.0272538	2.6949e-08	1.21746e-06	0.34057	0.0152818	0.0296001	0.184578	1.46566e-11	1.07203e-09	0.651965	0.00100494	0.00417184	0.24977
CRK_P721_F	Y	CRK	NM_005206.3	1.78559e-17	5.92638e-16	0.515703	0.0600767	0.241565	-0.10911	0.00011696	0.000703691	0.264311	0.0492503	0.0807348	0.185463	0.0127314	0.0220549	0.186818	0.604586	0.7453	0.0436252
CSF1R_E26_F	N	CSF1R	NM_005211.2	0.130384	0.21328	-0.0329669	0.288503	0.508772	-0.0353298	0.638384	0.722801	-0.00584268	0.000733499	0.00262624	0.0289591	0.000269812	0.000929219	0.0775592	0.115848	0.223266	0.0353256
CSF1R_P73_F	N	CSF1R	NM_005211.2	0.178001	0.270435	-0.0822023	0.0443734	0.208516	-0.158372	2.599e-07	6.68265e-06	0.302876	2.53545e-06	8.25923e-05	0.387666	2.47766e-05	0.000159902	0.192523	0.415896	0.594801	0.0474198
CSF1_P217_F	Y	CSF1	NM_172210.1	0.428178	0.5228	0.0382855	0.81037	0.909804	0.00550499	0.117791	0.203977	0.0736073	0.00069987	0.00254174	-0.0883477	0.46559	0.526617	-0.0256674	0.706219	0.828688	-0.0196994
CSF1_P339_F	Y	CSF1	NM_172210.1	0.155008	0.243448	0.063401	0.753414	0.874051	0.00484095	0.000746515	0.00307412	0.210614	0.481754	0.561012	0.0276566	0.412363	0.476233	-0.0226453	0.933809	0.959278	-0.00303326
CSF2_E248_R	N	CSF2	NM_000758.2	0.00408974	0.0122215	-0.209193	0.843067	0.923646	-0.00386475	0.0819207	0.151785	-0.029964	0.807604	0.853784	-0.00186801	0.877648	0.895131	0.00286654	5.20784e-05	0.000321255	0.044128
CSF2_P605_F	N	CSF2	NM_000758.2	8.2404e-05	0.000393083	-0.267784	0.877934	0.940317	-0.00579374	0.0758958	0.142339	-0.0524553	0.40942	0.493231	0.0117845	0.073255	0.105553	-0.171255	0.544349	0.700111	-0.0325914
CSF3R_P472_F	N	CSF3R	NM_172313.1	0.000294956	0.00124465	-0.214564	0.27089	0.494969	-0.0450186	0.311388	0.430505	0.018294	0.000820652	0.00287237	0.0693242	0.179487	0.234433	-0.118014	0.478493	0.649262	-0.0399172
CSF3R_P8_F	N	CSF3R	NM_172313.1	0.0452222	0.0896274	-0.154046	0.572647	0.740393	-0.0503967	0.869345	0.902849	-0.0103524	0.00618051	0.0140226	-0.191746	0.143086	0.191113	0.0934061	0.281838	0.453301	-0.0989494
CSF3_E242_R	N	CSF3	NM_172220.1	0.954037	0.965903	0.000520416	0.530526	0.712587	-0.0108214	0.525515	0.624761	0.006906	0.101856	0.150869	-0.0511282	0.0258594	0.041332	0.0436621	0.889807	0.934206	0.00356429
CSF3_P309_R	N	CSF3	NM_172220.1	0.0563847	0.10732	0.0682941	0.0623237	0.248003	0.0876357	0.825263	0.869867	0.0054655	0.0135156	0.0265812	-0.0811971	0.348743	0.417839	-0.0959354	0.669374	0.80137	0.0352817
CSK_P740_R	Y	CSK	NM_004383.1	0.13405	0.218115	-0.0177727	0.933796	0.963185	-0.00170812	1.14199e-05	0.000116421	-0.0734828	0.00340563	0.00861788	-0.069622	0.00103757	0.00260077	-0.0856667	1.45936e-07	3.61546e-06	-0.110776
CSPG2_E38_F	Y	CSPG2	NM_004385.2	0.0404712	0.0825548	0.232168	0.261197	0.492874	-0.00482378	0.98675	0.99062	0.000367168	0.0313474	0.0546533	-0.0354022	0.0030361	0.00627652	-0.0507005	0.000347751	0.0016537	-0.0447352
CSPG2_P82_R	Y	CSPG2	NM_004385.2	0.0638447	0.118151	0.213041	0.478774	0.674058	-0.0220435	0.481177	0.590326	-0.0389716	0.08789	0.132222	-0.0837622	0.0143263	0.0244502	-0.0713839	0.712522	0.833427	0.026579
CSTB_E410_F	Y	CSTB	NM_000100.2	0.725678	0.792774	-0.00203705	0.51241	0.700856	-0.00340729	4.75855e-08	1.81104e-06	-0.0307907	0.000145906	0.000873407	-0.0291614	0.173201	0.227275	-0.0234327	9.65217e-06	8.14601e-05	-0.0372729
CTAG1B_P4_R	Y	CTAG1B	NM_001327.1	0.0361384	0.075522	-0.0633983	0.0565227	0.235281	-0.0639884	0.0401761	0.0855902	-0.0337637	0.0190987	0.0356447	-0.0982509	0.182781	0.238174	0.0237113	0.0435805	0.102354	0.0291092
CTAG1B_P77_F	Y	CTAG1B	NM_001327.1	0.198729	0.291296	-0.0277518	0.277087	0.499296	-0.035341	0.00544282	0.0157739	0.0360907	0.652174	0.715528	-0.0198298	0.000241112	0.000847263	0.0629692	0.162809	0.294205	0.0368527
CTAG2_P1426_F	Y	CTAG2	NM_172377.2	0.00264709	0.00854187	-0.131651	0.156885	0.389546	-0.0725659	0.00202175	0.00701677	-0.0620987	0.0435915	0.0732566	-0.120973	0.000156551	0.000629483	0.139435	6.33851e-06	6.08497e-05	0.132261
CTGF_E156_F	Y	CTGF	NM_001901.1	5.71369e-05	0.000281289	0.358262	0.213982	0.443615	-0.00751369	1.52244e-07	4.33051e-06	-0.0294942	5.17244e-06	0.000108787	-0.0368679	0.00419514	0.0082612	-0.0624626	0.0114045	0.0340141	-0.0595275
CTGF_P693_R	N	CTGF	NM_001901.1	1.40579e-08	1.50999e-07	0.21248	0.257199	0.489735	-0.103653	0.368541	0.48218	0.0238202	0.0110477	0.0222987	0.0809504	1.63013e-06	1.97155e-05	0.171755	0.431059	0.606324	0.0441102
CTLA4_E176_R	N	CTLA4	NM_005214.2	0.212002	0.305473	-0.0786517	0.258605	0.490734	-0.0388401	0.205237	0.316192	-0.0426238	0.158644	0.219925	0.0249282	0.0109227	0.0193064	0.0362895	0.032232	0.0802405	0.0291938
CTLA4_P1128_F	N	CTLA4	NM_005214.2	0.0194526	0.0454781	-0.100685	0.0535354	0.228418	-0.0700962	0.378397	0.492558	-0.0356757	0.943108	0.959318	0.003396	0.0103188	0.0183871	0.11666	0.100078	0.198347	0.0835465
CTLA4_P992_F	N	CTLA4	NM_005214.2	0.0153832	0.0378057	-0.131864	0.124425	0.361804	-0.0360253	0.454954	0.565838	0.0662304	0.476082	0.555806	0.0773931	0.021222	0.0347146	0.12812	0.000628603	0.00279056	0.140415
CTNNA1_P185_R	Y	CTNNA1	NM_001903.2	0.11431	0.192722	0.00490863	0.199041	0.431628	0.0169672	0.000199856	0.00106221	-0.014657	0.00101715	0.00340381	-0.0179043	0.00885883	0.0160084	-0.0496113	0.0414865	0.0986428	-0.0391735
CTNNA1_P382_R	Y	CTNNA1	NM_001903.2	0.669501	0.744644	-0.0018531	0.951373	0.971488	-0.000350126	0.033301	0.0728638	0.0822942	0.000567369	0.0022403	-0.0203199	0.000117892	0.000508656	0.477809	0.340832	0.517822	0.074234
CTNNB1_P757_F	Y	CTNNB1	XM_945657.1	9.96621e-12	1.80095e-10	0.562577	0.924763	0.961048	-0.00345335	0.256576	0.374978	-0.0301622	0.0193199	0.0359701	-0.0622243	0.0324729	0.0508444	0.164729	0.372442	0.552856	0.0481991
CTSD_P726_F	Y	CTSD	NM_001909.3	0.653875	0.730437	-0.0331722	0.00946994	0.0763621	-0.241653	0.8202	0.865266	0.0152028	0.0373671	0.0639153	-0.147168	0.196525	0.253028	-0.14138	0.504569	0.668696	-0.0578518
CTSH_E157_R	Y	CTSH	NM_148979.1	0.00287115	0.00910393	0.198446	0.208949	0.439666	-0.00978385	0.169675	0.27405	-0.0234545	0.000184381	0.00101874	-0.0381139	0.00280914	0.00586256	-0.0454652	0.123314	0.234709	-0.0330541
CTSH_P238_F	Y	CTSH	NM_148979.1	0.299302	0.40046	0.0418954	0.176734	0.40588	0.00427816	0.00106472	0.00410906	-0.0137664	0.00295571	0.00761741	-0.0174216	0.627957	0.680429	-0.00480236	0.952374	0.966213	0.00169757
CTSL_P264_R	Y	CTSL	NM_001912.2	1.99396e-11	3.40303e-10	0.618085	0.232617	0.460764	-0.0374793	0.174402	0.280631	-0.0603373	0.15517	0.215694	-0.0771512	0.948574	0.955024	0.00448552	0.529806	0.687897	0.0409813
CTSL_P81_F	Y	CTSL	NM_001912.2	2.15003e-12	4.28888e-11	0.666805	0.0118997	0.0870379	-0.0381171	0.000819167	0.00331116	-0.0282561	0.000669908	0.00247351	-0.0401793	0.102475	0.14206	-0.0421337	0.00381202	0.0136486	-0.0571617
CTTN_E29_R	Y	CTTN	NM_005231.2	0.293259	0.393746	0.010854	0.644548	0.796481	0.00414497	0.226742	0.340445	-0.00858235	0.223026	0.294049	-0.0134631	0.157998	0.209031	-0.0162212	0.770475	0.869544	0.00616587
CXCL9_E268_R	N	CXCL9	NM_002416.1	1.3972e-07	1.21938e-06	-0.37226	0.144582	0.382999	-0.0931581	0.0283128	0.0629728	-0.120354	0.016719	0.031901	-0.142005	0.00832053	0.0151068	-0.308125	0.263863	0.428882	0.055393
CYP1A1_P382_F	Y	CYP1A1	NM_000499.2	0.0213874	0.0493259	0.24671	0.47696	0.673975	-0.00940927	0.021721	0.0509335	-0.0243945	0.000140813	0.000851532	-0.0371959	0.0227768	0.0370213	-0.0413315	0.0457394	0.105966	-0.0369453
CYP1B1_E83_R	Y	CYP1B1	NM_000104.2	2.52179e-10	3.62007e-09	0.641705	0.00739866	0.0653123	-0.0619453	0.0753108	0.141588	0.110319	0.43726	0.521049	0.0161114	0.561948	0.618747	0.0430557	0.560233	0.711356	0.0325621
CYP1B1_P212_F	Y	CYP1B1	NM_000104.2	0.0445076	0.0885539	0.165475	0.133229	0.370034	-0.0221355	0.0492549	0.101551	-0.0498247	0.0193492	0.0359811	-0.0602404	4.38593e-07	7.01749e-06	-0.0957817	5.68491e-10	5.82135e-08	-0.0900664
CYP2E1_E53_R	N	CYP2E1	NM_000773.3	0.2362	0.33163	-0.065338	0.166411	0.395064	-0.0981922	0.0529402	0.107704	-0.077415	0.00238125	0.0064353	-0.23442	0.0834461	0.117806	0.102125	0.233538	0.391182	0.0753333
CYP2E1_P416_F	N	CYP2E1	NM_000773.3	0.417636	0.511963	-0.0312258	0.116378	0.348454	-0.111638	0.134615	0.227719	-0.0640968	0.0464295	0.076942	-0.0924773	0.00932833	0.0167779	0.106525	0.645324	0.782953	0.0225782
DAB2IP_E18_R	Y	DAB2IP	NM_032552.1	0.675737	0.748597	0.0335198	0.00939134	0.0763233	-0.0531225	0.357612	0.4719	-0.0350579	0.0324577	0.056143	-0.0815751	0.000588027	0.00163371	-0.0623355	0.00979315	0.0303884	-0.045216
DAB2IP_P671_F	Y	DAB2IP	NM_032552.1	0.0292945	0.0639152	0.132064	1.58726e-06	7.17069e-05	-0.159958	0.000153415	0.000860166	0.131375	0.798814	0.846192	-0.0115511	0.503442	0.564031	0.033349	0.807269	0.893991	-0.00912452
DAB2IP_P9_F	Y	DAB2IP	NM_032552.1	0.494967	0.583029	0.0201392	0.150555	0.387358	-0.0123175	1.77455e-08	9.73469e-07	-0.0567936	2.16154e-06	8.09786e-05	-0.0680987	0.00296342	0.00615111	-0.0467623	0.163933	0.295542	-0.0259686
DAB2_P35_F	Y	DAB2	NM_001343.1	0.029562	0.0642251	0.215247	0.83281	0.918303	-0.00166869	0.153759	0.252863	0.0558764	0.00148347	0.00448546	-0.0163807	1.49661e-05	0.000112136	-0.0400268	0.976695	0.98374	0.00127505
DAB2_P468_F	Y	DAB2	NM_001343.1	0.00601385	0.0169189	0.326566	0.357306	0.575286	-0.00386081	0.391971	0.507218	0.0328615	0.00376435	0.00935605	-0.0242922	0.000250532	0.000874584	-0.0313408	0.305304	0.481465	-0.0158163
DAPK1_E46_R	Y	DAPK1	NM_004938.1	0.209322	0.303511	-0.0181943	0.566815	0.736596	0.0215943	0.00019729	0.00105241	-0.0716958	0.00131288	0.00411714	-0.0735509	0.515653	0.576031	0.0223592	0.767644	0.868774	-0.00851357
DAPK1_P10_F	Y	DAPK1	NM_004938.1	0.0167875	0.0405382	-0.0150448	0.206523	0.439666	-0.00878337	0.000131569	0.000771336	-0.0299135	0.00109474	0.00362398	-0.0367019	4.9677e-05	0.000266797	-0.048092	4.67085e-05	0.000291643	-0.0393855
DAPK1_P345_R	Y	DAPK1	NM_004938.1	0.250804	0.347999	0.0241683	0.404757	0.617675	0.00487438	0.00296561	0.00961007	-0.0197594	0.00197728	0.00555109	-0.0298106	0.00500567	0.00969542	-0.0304448	0.00470808	0.0163611	-0.0266624
DBC1_E204_F	Y	DBC1	NM_014618.1	0.318499	0.418132	-0.0308684	0.745883	0.870719	0.0113776	0.0204461	0.0483157	-0.063987	0.000647141	0.00244514	-0.121619	0.000235682	0.000837979	-0.10623	0.168864	0.302302	-0.0433964
DBC1_P351_R	Y	DBC1	NM_014618.1	0.0135641	0.0339877	-0.0214063	0.818856	0.913201	-0.00415163	0.0108193	0.0283591	-0.0357758	0.0467409	0.077206	-0.0417225	0.017963	0.0299904	-0.0193354	0.0932766	0.187522	0.0865496
DCC_E53_R	Y	DCC	NM_005215.1	0.0122109	0.0311561	0.190445	0.738796	0.866109	0.018715	5.1808e-06	6.26591e-05	-0.11525	4.18472e-05	0.000415217	-0.144595	0.0115001	0.0202062	-0.0756015	0.262512	0.4285	-0.0350532
DCC_P177_F	Y	DCC	NM_005215.1	0.0499999	0.0974618	0.160896	0.990978	0.994215	0.000311792	0.0192406	0.0458905	-0.0187498	0.00117753	0.00383197	-0.0304286	3.15686e-06	3.16924e-05	-0.0551254	0.864035	0.922919	0.0090377
DCC_P471_R	Y	DCC	NM_005215.1	0.0462468	0.0910706	0.162155	0.941934	0.966473	0.00165718	0.00028431	0.00140871	-0.0434482	0.00174279	0.0050892	-0.0542815	0.00108864	0.00269267	-0.0482191	0.7477	0.858818	0.0158132
DCN_P1320_R	N	DCN	NM_133505.2	0.407594	0.503267	-0.0428181	0.299369	0.517828	-0.026287	0.307607	0.428053	-0.0145953	0.493585	0.570464	-0.00604644	0.985229	0.986513	-0.000607507	0.791463	0.883494	0.0122661
DCN_P1326_F	N	DCN	NM_133505.2	0.344034	0.439997	-0.0149967	0.144443	0.382999	-0.0273108	0.413951	0.529416	-0.005747	0.0579906	0.0924959	0.0136111	0.00017841	0.000690957	0.115855	1.76284e-06	2.4013e-05	0.121152
DDB2_P407_F	Y	DDB2	NM_000107.1	4.85717e-18	1.81966e-16	0.62313	0.75576	0.875592	0.0223067	0.395256	0.509827	0.0536319	0.129844	0.185354	-0.0376597	0.213259	0.271388	0.131339	0.820509	0.902895	0.0134267
DDB2_P613_R	Y	DDB2	NM_000107.1	2.52404e-23	4.84616e-21	0.680685	0.39066	0.60719	0.0680161	0.154901	0.254197	0.11255	0.905573	0.93353	-0.00920881	0.720506	0.768006	0.0359564	0.859898	0.921062	-0.0134294
DDIT3_P1313_R	Y	MBD6	NM_052897.3	1.1098e-11	1.98216e-10	0.498155	0.438203	0.639684	-0.0399389	0.00364333	0.0114381	-0.097443	0.505462	0.581541	-0.0392941	0.00474357	0.00922295	0.367522	0.000841792	0.00362183	0.261388
DDR1_E23_R	Y	DDR1	NM_001954.3	0.0119019	0.0304688	0.192381	0.715958	0.849354	0.00549773	0.362171	0.47628	0.0380105	0.000524807	0.00213169	-0.0408332	0.000418294	0.00129909	-0.04794	1.23081e-05	0.000101097	-0.045677
DDR1_P332_R	N	DDR1	NM_001954.3	3.08795e-09	3.70554e-08	0.248184	0.771808	0.883381	0.0245586	0.00844815	0.0227655	0.180754	0.465667	0.546838	-0.0730568	0.000728461	0.0019392	-0.147277	0.471658	0.642258	-0.0413196
DDR1_P667_R	N	DDR1	NM_001954.3	0.387351	0.483716	-0.0673654	0.999035	0.999141	-7.81782e-05	0.0989131	0.177697	0.0977637	0.0100155	0.0206217	0.159896	0.0125163	0.0217724	-0.255665	0.425	0.60166	-0.0773193
DDR2_E331_F	N	DDR2	NM_001014796.1	0.00753378	0.020266	-0.21884	0.0022264	0.0280308	-0.244784	9.95577e-06	0.000106195	0.22378	0.135335	0.192298	0.130583	0.593843	0.649212	0.0457411	0.589679	0.735781	0.0480464
DDR2_P743_R	N	DDR2	NM_001014796.1	0.00939138	0.0245744	-0.174469	0.0045333	0.0458102	-0.187317	6.5383e-09	5.57935e-07	0.338981	0.0374886	0.0639805	0.131713	4.57625e-06	4.42083e-05	0.362015	0.0717872	0.151671	0.161193
DES_E228_R	Y	DES	NM_001927.3	4.52367e-06	2.80176e-05	0.331218	0.717174	0.849985	0.00468473	0.0610434	0.120518	0.0682315	0.949455	0.962616	-0.00288102	1.83183e-05	0.000128839	0.441667	0.688582	0.817991	-0.0170121
DES_P1006_R	N	DES	NM_001927.3	0.00397817	0.0119345	-0.181746	0.0388188	0.195494	0.0979041	0.179373	0.284841	-0.0509432	0.205718	0.274052	-0.0533013	0.395035	0.460724	-0.0618998	0.541002	0.697716	0.0317531
DHCR24_P406_R	Y	DHCR24	NM_014762.2	7.54177e-06	4.43837e-05	0.504146	0.0352629	0.184859	-0.0343722	0.360186	0.474482	0.024175	0.00226777	0.0062313	-0.010307	0.02227	0.0363129	-0.0209556	1.01669e-05	8.53354e-05	-0.0276386
DHCR24_P652_R	N	DHCR24	NM_014762.2	2.16457e-07	1.75914e-06	0.3099	0.79334	0.897988	0.0221121	0.258606	0.377225	-0.0423663	0.598365	0.670379	0.0409419	0.43788	0.50118	-0.044173	0.59358	0.736461	0.0400305
DIO3_E230_R	Y	DIO3	NM_001362.2	0.228307	0.323804	0.119577	0.679614	0.825207	-0.0307549	0.119077	0.205278	-0.0857039	0.385406	0.470949	-0.0698127	0.0646478	0.0946606	0.211295	0.0514779	0.116109	0.163168
DIO3_P674_F	Y	DIO3	NM_001362.2	0.363203	0.461022	0.0052657	0.198655	0.43159	0.0154237	0.00326587	0.0104508	-0.027827	0.00646206	0.0144839	-0.0352882	0.000585252	0.00163241	0.389638	0.0956592	0.191568	0.122461
DIO3_P90_F	Y	DIO3	NM_001362.2	0.455869	0.548757	0.0207729	0.285313	0.507181	0.0256449	0.0760029	0.142366	-0.0252425	0.325573	0.409942	0.0239213	0.529487	0.587215	-0.0315072	0.0050565	0.0172595	-0.079173
DIRAS3_E55_R	Y	DIRAS3	NM_004675.2	0.0251647	0.0561816	0.0243605	0.1037	0.325734	-0.113141	0.0124422	0.0319053	0.0382417	0.0102595	0.0210115	0.0467978	0.00147159	0.00342999	0.0981887	0.437712	0.612876	-0.0670549
DIRAS3_P745_F	Y	DIRAS3	NM_004675.2	0.965403	0.973005	-0.0021945	0.0287913	0.163186	-0.185306	0.277271	0.398017	-0.0596422	0.998068	0.998718	0.000148219	2.39256e-06	2.58801e-05	0.305419	0.241827	0.401564	0.0786344
DKC1_E101_F	Y	DKC1	NM_001363.2	0.38144	0.479706	-0.0608389	0.534185	0.714728	-0.045917	0.504013	0.608141	-0.0364927	0.468242	0.547769	-0.0451137	0.0781591	0.111677	-0.0510734	0.0653535	0.140601	0.106345
DKC1_P276_F	Y	DKC1	NM_001363.2	0.219577	0.315206	-0.129195	0.126038	0.361804	-0.15317	0.291445	0.413779	-0.0922509	0.864785	0.900549	-0.0184152	0.739594	0.78292	-0.0206559	0.00900198	0.0280467	0.214006
DKFZP564O0823_E45_F	Y	DKFZP564O0823	NM_015393.2	0.508444	0.59502	0.0167765	0.925525	0.961048	0.000497646	0.00166877	0.00600288	-0.017944	0.000264112	0.00129196	-0.0286539	7.21665e-05	0.000353018	-0.0901724	6.38076e-09	3.97576e-07	-0.102967
DKFZP564O0823_P386_F	N	DKFZP564O0823	NM_015393.2	0.0022122	0.00726055	0.15968	1.96925e-05	0.000581687	-0.192338	0.648886	0.731246	0.0162545	0.00117217	0.00383197	0.162589	0.0251725	0.0404446	0.101261	0.035382	0.0868159	-0.128045
DLC1_E276_F	N	DLC1	NM_182643.1	0.00156132	0.00538632	-0.193323	2.91766e-07	1.8673e-05	-0.276431	0.00564517	0.0162378	0.198902	0.0579148	0.0924959	-0.14418	0.000249538	0.0008731	0.129502	0.95099	0.965447	0.00375928
DLC1_P695_F	N	DLC1	NM_182643.1	0.115953	0.194862	-0.113925	1.29939e-07	9.07209e-06	-0.291866	0.861744	0.896253	0.00754183	1.39593e-05	0.00021879	-0.30344	0.00129358	0.00310459	-0.397205	0.0384138	0.0926273	-0.181914
DLC1_P88_R	N	DLC1	NM_182643.1	0.000155745	0.000695422	-0.195956	1.05048e-07	7.68352e-06	-0.272993	0.0260351	0.0588953	0.111201	1.1638e-06	5.58622e-05	-0.346274	2.11015e-05	0.000139706	0.216223	0.510438	0.672915	0.0474349
DLG3_E340_F	Y	DLG3	NM_021120.1	0.767483	0.825528	0.0295594	0.411665	0.622972	-0.0736676	0.510435	0.611666	-0.0521564	0.483154	0.56179	-0.0671709	0.0608335	0.089588	-0.07998	0.025077	0.0659558	0.19364
DLG3_P62_R	Y	DLG3	NM_021120.1	0.643395	0.72133	-0.0460211	0.0849243	0.299183	-0.15331	0.541366	0.636707	-0.0508942	0.822599	0.864827	0.0223127	0.216689	0.275297	-0.0526688	0.01291	0.0376992	0.206981
DLK1_E227_R	Y	DLK1	NM_003836.4	0.0121316	0.0310053	0.18196	0.526467	0.710703	0.012417	0.420656	0.535317	-0.0270595	0.0195475	0.0362182	-0.0513038	0.0110645	0.0195345	-0.0405664	0.518771	0.680069	0.0226255
DLL1_P386_F	Y	DLL1	NM_005618.2	0.182843	0.27561	0.0151134	0.0690067	0.264325	0.00551906	1.09742e-05	0.000114669	-0.0213347	0.000304258	0.0014135	-0.02526	0.0002205	0.000805226	-0.0387732	8.08943e-07	1.46181e-05	-0.0390305
DLL1_P832_F	Y	DLL1	NM_005618.2	5.12834e-07	3.89957e-06	0.409232	0.0283424	0.161754	-0.140662	0.911732	0.936736	-0.0062251	6.34354e-05	0.000526034	-0.160397	0.0611332	0.0899431	-0.0889965	0.00510747	0.0173949	-0.0983569
DMP1_E194_F	N	DMP1	NM_004407.1	0.223312	0.319076	-0.0152937	0.101501	0.32409	-0.0223801	0.580088	0.669937	0.00419549	0.370263	0.457174	-0.0181962	0.000332851	0.00108822	0.0491712	4.76143e-06	4.94108e-05	0.0527105
DMP1_P134_F	N	DMP1	NM_004407.1	0.288216	0.388333	-0.0130428	0.246628	0.477706	-0.032517	0.179128	0.284841	-0.0668673	0.228091	0.299698	-0.0333022	5.01894e-06	4.7295e-05	0.262793	4.23361e-09	2.82732e-07	0.252712
DNAJC15_E26_R	Y	DNAJC15	NM_013238.2	1.26046e-07	1.11268e-06	0.307863	0.434315	0.635947	0.0354861	0.113488	0.197863	-0.04256	0.00600606	0.0137691	-0.0799866	0.25251	0.314818	-0.0167159	0.872609	0.92673	-0.00222336
DNAJC15_P65_F	Y	DNAJC15	NM_013238.2	0.00244201	0.00791335	0.0688438	0.544966	0.720724	0.0292208	0.495526	0.601682	-0.0288522	0.0309406	0.0540668	-0.107806	0.00262879	0.00553884	0.281864	0.00383948	0.013715	0.215902
DNASE1L1_E178_R	Y	DNASE1L1	NM_001009934.1	0.013623	0.0340711	-0.165984	0.116864	0.349227	-0.128708	0.473217	0.583356	-0.0479535	0.383942	0.469908	0.0871845	0.23108	0.290934	0.149684	0.135188	0.252921	0.137638
DNASE1L1_P108_F	Y	DNASE1L1	NM_001009934.1	7.27556e-05	0.000348139	-0.24288	0.129895	0.366736	-0.125468	0.151833	0.25131	-0.0703838	0.0987646	0.146714	-0.0996498	0.207194	0.264327	0.141017	0.494166	0.659476	0.0341692
DNASE1L1_P39_R	Y	DNASE1L1	NM_001009934.1	0.0585803	0.110269	-0.188496	0.14537	0.382999	-0.146362	0.521352	0.621254	-0.0613923	0.95884	0.96766	0.00585559	0.152012	0.201633	0.190718	0.017862	0.0493453	0.190478
DNMT1_P100_R	Y	DNMT1	NM_001379.1	0.123872	0.205029	0.131409	0.0492612	0.21932	-0.0625589	5.23123e-07	1.0839e-05	-0.0479718	0.000541287	0.00217648	-0.0418047	1.07505e-05	8.69096e-05	-0.0734503	0.0766448	0.159521	-0.034394
DNMT2_P199_F	Y	DNMT2	NM_004412.3	5.81937e-05	0.000284062	-0.321154	1.84447e-06	8.09461e-05	-0.293534	2.07479e-05	0.000187463	-0.261723	2.81107e-06	8.28283e-05	-0.304164	0.900044	0.913726	-0.00834309	0.387269	0.568305	0.0665768
DNMT3B_P352_R	N	DNMT3B	NM_175848.1	0.0153481	0.03778	0.159889	0.0496904	0.219323	-0.0475452	0.0159282	0.0392708	-0.0578452	0.000192439	0.00105191	-0.0894374	0.00045595	0.00138849	-0.0959879	0.444788	0.618746	-0.0284634
DSC2_E90_F	Y	DSC2	NM_024422.2	6.44885e-21	4.71687e-19	0.660431	0.208128	0.439666	0.094448	0.577987	0.668012	0.035203	1.60157e-05	0.000238068	-0.135996	9.51276e-05	0.000429753	0.518124	0.00169685	0.00663194	0.299994
DSC2_P407_R	N	DSC2	NM_024422.2	0.0215583	0.0495712	-0.0981449	0.532208	0.713949	-0.0221767	0.538812	0.634675	-0.01546	0.299187	0.380108	-0.0315784	0.00257892	0.0055017	0.100354	0.660222	0.796623	-0.0296848
DSG1_E292_F	N	DSG1	NM_001942.1	0.0200236	0.0465298	-0.11302	0.0299509	0.166683	-0.131153	0.664093	0.743365	0.0191417	0.809356	0.855001	-0.0109273	0.0210924	0.0345394	0.0982964	0.133998	0.251616	0.0959
DSG1_P159_R	N	DSG1	NM_001942.1	3.8862e-07	3.01475e-06	-0.438505	0.0102428	0.0793746	-0.25233	0.0132984	0.0336513	-0.142588	0.00730467	0.0160515	-0.217741	0.409817	0.473648	-0.0557108	0.527199	0.685091	-0.0488273
DSP_P36_F	Y	DSP	NM_004415.2	0.436645	0.531813	0.0227323	0.163416	0.391587	-0.0112051	3.86943e-05	0.000297172	-0.0493171	0.012959	0.0256178	-0.0432254	0.00636289	0.0119043	-0.0747694	0.0997736	0.198347	-0.05081
DSP_P440_R	Y	DSP	NM_004415.2	0.326581	0.426708	0.0272941	0.172678	0.402479	-0.0155505	0.20381	0.314626	-0.0286757	0.000161134	0.000924807	-0.0594219	0.070427	0.102053	0.0649398	0.117674	0.226125	0.0935487
DST_E31_F	Y	DST	NM_020388.2	0.246884	0.34349	-0.00401809	0.519286	0.705862	-0.0021612	0.000443963	0.00202352	-0.0207297	0.0012551	0.00400798	-0.0273726	0.00143536	0.00335573	-0.0524751	2.35819e-05	0.000167848	-0.0513387
DST_P262_R	Y	DST	NM_020388.2	0.107477	0.183244	0.0257547	0.976243	0.987169	-0.000131713	5.89482e-05	0.000423105	-0.0181241	0.00014857	0.000878521	-0.0235153	1.83696e-05	0.000128839	-0.0662447	2.71093e-08	1.2247e-06	-0.0649242
DUSP4_E61_F	Y	DUSP4	NM_001394.5	0.92971	0.949491	-0.00106904	0.0410873	0.201629	-0.0183216	3.85116e-08	1.55668e-06	-0.0592117	1.88279e-06	7.5131e-05	-0.0700542	0.000868823	0.00224665	-0.0937681	2.38161e-05	0.000168579	-0.086339
DUSP4_P925_R	Y	DUSP4	NM_001394.5	1.0177e-20	5.78959e-19	0.737436	0.0193191	0.123129	-0.0259454	0.0691917	0.132187	0.142693	0.000468034	0.00195353	-0.16023	5.03739e-05	0.000269597	-0.0277151	7.16665e-06	6.71218e-05	-0.0244457
E2F1_P772_R	Y	E2F1	NM_005225.1	0.00380796	0.0114837	0.0333781	0.0329143	0.179246	-0.157769	0.087352	0.15992	0.0334812	0.102821	0.152151	-0.0873784	3.1174e-05	0.000191919	0.128662	0.545313	0.700335	0.0363169
E2F3_P840_R	Y	E2F3	NM_001949.2	0.46457	0.556615	0.0275686	0.4855	0.678551	0.0106543	0.339922	0.458261	-0.0199881	0.000545357	0.00218143	-0.0460202	5.62921e-05	0.000295101	-0.0756494	0.0788165	0.163157	-0.0433637
E2F5_P516_R	Y	E2F5	NM_001951.2	0.000772181	0.00288581	0.320733	0.0104536	0.0802833	-0.12007	0.00768655	0.0209336	0.185323	0.693402	0.752696	0.023388	0.0673024	0.0978944	0.127234	0.652876	0.790242	0.0330184
EDN1_E50_R	Y	EDN1	NM_001955.2	4.06303e-06	2.52665e-05	0.526026	0.044364	0.208516	-0.0397487	0.0716385	0.136131	-0.0113807	2.5685e-05	0.000310647	-0.0225539	0.022129	0.0361214	-0.0952131	0.00366481	0.0131783	-0.0870597
EDN1_P39_R	Y	EDN1	NM_001955.2	3.26745e-06	2.06535e-05	0.354296	0.777102	0.888117	0.000882477	0.105674	0.186141	0.00469635	0.019807	0.0365228	-0.00452847	0.000439892	0.00135406	-0.0252748	7.54775e-05	0.000440811	-0.0208896
EDNRB_P148_R	N	EDNRB	NM_000115.1	0.00184392	0.00623848	-0.107364	0.208106	0.439666	-0.0693329	0.311322	0.430505	-0.0250618	0.108901	0.159306	-0.0926082	5.98459e-05	0.000305854	0.0967893	0.0316456	0.0791963	0.0630414
EDNRB_P709_R	N	EDNRB	NM_000115.1	0.00033566	0.00138969	-0.116039	0.258785	0.490734	-0.0681562	0.299039	0.420241	-0.0499358	0.408066	0.492372	0.00797689	0.00109901	0.00271395	0.0525079	0.000114844	0.00062776	0.0510086
EFNA1_P591_R	Y	EFNA1	NM_182685.1	5.74964e-20	2.84886e-18	0.77612	0.00146047	0.0200543	-0.106266	0.131453	0.223353	-0.0163337	0.00580643	0.0134317	-0.0301661	1.99766e-05	0.00013458	-0.0398721	5.83259e-08	1.79177e-06	-0.0389798
EFNA1_P7_F	Y	EFNA1	NM_182685.1	0.0307971	0.0662526	0.0879338	0.739938	0.866109	0.00138595	0.271958	0.392388	0.0438907	0.0682842	0.106266	-0.0205833	0.000884654	0.00227726	-0.0266866	0.443203	0.617749	-0.0134402
EFNB1_E69_F	Y	EFNB1	NM_004429.3	0.169476	0.260055	-0.127873	0.292967	0.510774	-0.104348	0.24608	0.362396	-0.0890966	0.765243	0.816827	-0.0294017	0.491846	0.55317	-0.0401499	0.00787975	0.0249039	0.256447
EFNB1_P136_R	Y	EFNB1	NM_004429.3	0.117035	0.195958	-0.0935902	0.101734	0.32409	-0.0922036	0.801689	0.849823	-0.0141041	0.578989	0.650568	0.0378257	0.011728	0.0205642	-0.0683739	0.0469658	0.107993	0.146713
EFNB1_P17_F	Y	EFNB1	NM_004429.3	0.114429	0.192722	-0.169487	0.178945	0.408409	-0.141372	0.347179	0.46371	-0.0891236	0.975612	0.981362	-0.00329519	0.0148541	0.0252109	-0.130707	0.0109	0.0330226	0.242424
EFNB3_E17_R	Y	EFNB3	NM_001406.3	0.904448	0.931994	-0.00492033	0.529284	0.712207	-0.0244447	1.17099e-08	8.52462e-07	-0.162232	1.56493e-05	0.00023566	-0.158663	1.90799e-11	1.33212e-09	-0.513829	3.79795e-08	1.49581e-06	-0.43535
EFNB3_P442_R	Y	EFNB3	NM_001406.3	0.00896818	0.0235472	0.212772	0.887473	0.941897	0.00146716	0.6228	0.708052	-0.0135577	0.00255127	0.00676813	-0.0484757	0.000267044	0.000923829	-0.110047	1.24876e-05	0.000101624	-0.120482
EGFR_E295_R	Y	EGFR	NM_005228.3	0.740326	0.803066	0.000913608	0.270844	0.494969	0.00321014	0.262159	0.381347	-0.0126875	0.00104697	0.00348084	-0.0221002	1.13939e-05	9.07693e-05	-0.0356258	7.63554e-07	1.40847e-05	-0.0323813
EGFR_P260_R	Y	EGFR	NM_005228.3	0.572638	0.652141	-0.00438193	0.00734667	0.0652283	-0.0141716	4.44563e-07	9.484e-06	-0.0375856	4.02869e-05	0.000415217	-0.0426842	0.00259627	0.0055081	-0.0570369	0.00031115	0.0014982	-0.0541681
EGF_E339_F	N	EGF	NM_001963.2	0.00150846	0.00525397	0.0357437	0.156273	0.389546	-0.124705	0.7857	0.838285	0.00694317	0.0955545	0.142221	-0.117475	6.01353e-05	0.000305854	0.0585892	0.640968	0.779514	-0.0197565
EGF_P242_R	N	EGF	NM_001963.2	0.0245584	0.0550683	0.018933	0.0751661	0.278205	-0.0922351	0.969412	0.977686	-0.000411006	0.673094	0.734806	-0.0131638	1.14053e-05	9.07693e-05	0.246122	0.0933947	0.187522	0.121801
EGF_P413_F	N	EGF	NM_001963.2	0.538046	0.621222	-0.00933892	0.0671337	0.259741	-0.103212	0.166858	0.270924	-0.0520328	0.000963688	0.00326041	-0.203164	0.0430587	0.0654834	-0.136135	0.560841	0.711356	0.0364217
EGR4_E70_F	Y	EGR4	NM_001965.1	0.0167246	0.0405382	-0.0506452	0.0553929	0.231835	-0.0455682	7.58168e-08	2.47776e-06	-0.180497	7.97422e-05	0.000597483	-0.190475	0.000770195	0.00204675	-0.146812	0.000657661	0.00290278	-0.121592
EGR4_P479_F	Y	EGR4	NM_001965.1	0.753467	0.813872	0.00746275	0.0133761	0.093816	-0.0230893	1.29229e-05	0.000128893	-0.0538184	1.42738e-05	0.00022146	-0.0687175	0.0641992	0.0940935	0.160668	0.126104	0.239426	-0.046605
EIF2AK2_E103_R	Y	EIF2AK2	NM_002759.1	0.124224	0.20517	0.00644062	0.536119	0.715719	-0.00228744	1.62305e-07	4.53274e-06	-0.0328166	7.24279e-05	0.000565534	-0.0349648	0.0483419	0.0728687	-0.0228045	4.6026e-06	4.80925e-05	-0.0337675
EIF2AK2_P313_F	Y	EIF2AK2	NM_002759.1	0.0462253	0.0910706	0.182534	0.0518577	0.223746	-0.016004	0.0687013	0.131578	0.123966	0.620655	0.687329	0.0290263	3.03692e-06	3.08921e-05	0.583581	0.226341	0.381725	0.0883771
ELK1_E156_F	Y	ELK1	NM_005229.2	0.0988973	0.17049	-0.121852	0.263938	0.493799	-0.0889713	0.439175	0.551572	-0.0502374	0.687276	0.747631	-0.0307611	0.030491	0.0479858	-0.0715628	0.0414575	0.0986428	0.134386
ELK1_E53_F	Y	ELK1	NM_005229.2	0.165566	0.256619	-0.132704	0.182956	0.411444	-0.13045	0.688602	0.763018	-0.0381506	0.885843	0.919361	-0.0156254	0.368938	0.43726	-0.0486517	0.00700097	0.022544	0.241895
ELK1_P195_R	Y	ELK1	NM_005229.2	0.126185	0.207962	-0.11355	0.273217	0.495984	-0.0862409	0.0177406	0.0429803	-0.131938	0.184446	0.249929	-0.1019	0.160899	0.212321	-0.0345577	0.0785477	0.16282	0.0947624
ELK1_P569_R	Y	ELK1	NM_005229.2	0.0481177	0.0942714	-0.175674	0.237313	0.465533	-0.115771	0.231553	0.346315	-0.0965118	0.267904	0.344641	-0.104314	0.333306	0.4028	-0.0409141	0.0204765	0.0555687	0.179519
ELK1_P6_R	Y	ELK1	NM_005229.2	0.245093	0.341618	-0.140609	0.31522	0.536783	-0.114108	0.486896	0.595439	-0.0750804	0.621971	0.687795	-0.0640979	0.873726	0.891723	-0.00880082	0.00184071	0.00713972	0.373301
ELK3_P514_F	Y	ELK3	NM_005230.2	2.40662e-20	1.27468e-18	0.662533	0.166348	0.395064	-0.0752298	4.22003e-05	0.000319308	0.335992	0.933867	0.952469	0.00631671	0.00535441	0.0102293	0.342194	0.945251	0.961933	0.00585308
ELL_P693_F	Y	ELL	NM_006532.2	0.0371428	0.0769923	0.164191	0.000272785	0.00537176	-0.221257	0.00511271	0.0150155	0.171693	0.0532587	0.0856601	0.158149	0.184092	0.239024	0.160954	0.0752414	0.157668	0.121105
EMR3_E61_F	N	EMR3	NM_152939.1	3.97075e-05	0.00019997	-0.341708	0.168123	0.397287	-0.116873	0.000385092	0.00181442	-0.194766	0.0860695	0.130249	-0.102043	0.156513	0.207424	-0.139711	0.316684	0.494336	-0.0868849
EMR3_P1297_R	Y	EMR3	NM_152939.1	2.08145e-05	0.000113776	-0.30429	0.0202574	0.126485	-0.16835	0.0622535	0.122278	-0.113954	0.00599118	0.0137555	-0.188491	0.00117012	0.0028643	-0.38253	0.256092	0.419795	-0.0642073
EMR3_P39_R	N	EMR3	NM_152939.1	6.52872e-05	0.000317346	-0.345448	0.103238	0.325613	-0.135243	0.00315937	0.0101736	-0.0966525	0.0627866	0.0992859	-0.12116	0.00533427	0.0102163	-0.245009	0.0653577	0.140601	-0.182855
ENC1_P484_R	Y	ENC1	NM_003633.1	9.58549e-06	5.55531e-05	0.535149	0.00117912	0.0170861	-0.0483112	0.000112193	0.000692081	-0.0196727	2.8835e-05	0.000340697	-0.0265305	0.419463	0.483342	0.0535324	0.874686	0.92673	-0.0107556
EPHA1_E46_R	Y	EPHA1	NM_005232.3	0.0511301	0.0990364	0.0797364	0.73527	0.863436	-0.0148856	0.620878	0.706944	0.00787525	0.0298316	0.0524272	-0.0230559	0.0265322	0.0421442	0.192761	0.319339	0.496965	-0.0240855
EPHA1_P119_R	Y	EPHA1	NM_005232.3	6.89925e-19	2.78875e-17	0.687834	0.402523	0.615812	-0.0468886	0.178329	0.284143	0.0697895	0.102958	0.152207	-0.00808413	0.0576828	0.0854395	0.147596	0.167397	0.300826	-0.0481964
EPHA2_P203_F	Y	EPHA2	NM_004431.2	1.86519e-11	3.21902e-10	0.362474	5.22628e-09	5.73398e-07	0.377892	0.00476597	0.0142375	0.201735	0.707096	0.763783	0.0256684	9.42892e-08	1.95714e-06	0.485195	0.230809	0.387456	0.0958705
EPHA2_P340_R	N	EPHA2	NM_004431.2	1.77855e-09	2.23922e-08	0.375217	7.88785e-07	4.17784e-05	0.38852	0.231095	0.345967	0.045172	0.821607	0.864827	0.00963791	2.83122e-06	2.93834e-05	0.42654	0.675262	0.805907	-0.0297731
EPHA3_E156_R	Y	EPHA3	NM_005233.3	0.0425215	0.085265	0.209584	0.496994	0.688349	-0.011842	3.18588e-07	7.41442e-06	-0.0876748	0.000203189	0.0010725	-0.0921129	0.0253176	0.0406352	-0.0508978	0.000178624	0.000930058	-0.0628408
EPHA3_P106_R	Y	EPHA3	NM_005233.3	0.00601579	0.0169189	0.328058	0.80223	0.904718	-0.00283559	1.84903e-05	0.000171091	-0.0438462	0.000298692	0.00139875	-0.0531547	3.31961e-07	5.72912e-06	-0.0957595	3.27186e-10	4.53245e-08	-0.0907096
EPHA5_E158_R	Y	EPHA5	NM_182472.1	0.302726	0.403285	0.00751591	0.346261	0.568456	0.00612779	0.00167847	0.00602365	-0.0141653	0.0511782	0.0827471	-0.0137167	0.0785134	0.111975	-0.032833	4.83329e-08	1.68726e-06	-0.0505797
EPHA5_P66_F	Y	EPHA5	NM_182472.1	0.138449	0.223615	0.121595	0.649407	0.800656	-0.0270984	0.0178364	0.0430776	-0.108977	0.00290103	0.00751431	-0.150009	0.141127	0.188989	-0.0742895	0.408845	0.588553	0.0632189
EPHA7_E6_F	Y	EPHA7	NM_004440.2	0.252826	0.350489	-0.00517453	0.600544	0.762975	-0.00300264	0.000498192	0.00223097	-0.0223204	0.00063854	0.00242772	-0.0314018	3.0034e-05	0.000186017	-0.094656	0.180908	0.318663	-0.0509781
EPHA7_P205_R	Y	EPHA7	NM_004440.2	0.250493	0.347882	0.0036838	0.660366	0.809515	-0.00161478	0.000536196	0.00237348	-0.019415	0.000886575	0.00306707	-0.0259532	1.13677e-06	1.49238e-05	-0.136661	0.0400431	0.0958041	-0.094755
EPHA8_P256_F	Y	EPHA8	NM_020526.3	0.0367831	0.0765568	0.0606858	0.864442	0.935058	0.00317415	0.000437023	0.00200978	-0.0544361	4.1014e-05	0.000415217	-0.0853745	0.389526	0.45499	-0.0166756	0.87605	0.92673	0.00778427
EPHA8_P456_R	Y	EPHA8	NM_020526.3	0.409239	0.504082	0.0347912	0.00354013	0.0385648	-0.242572	0.92059	0.941751	-0.00516288	0.000249703	0.00124124	0.0957767	0.0209383	0.0343237	0.229618	0.018216	0.050233	0.189456
EPHB1_E202_R	Y	EPHB1	NM_004441.3	0.0979287	0.169122	-0.0712233	0.783985	0.893324	-0.0149776	8.28197e-11	3.18028e-08	-0.367799	6.50201e-05	0.000531228	-0.287834	1.2693e-05	9.74819e-05	-0.364807	0.000272754	0.00133423	-0.247661
EPHB1_P503_F	Y	EPHB1	NM_004441.3	0.595403	0.674439	-0.0052508	0.219283	0.444919	-0.0118917	0.179193	0.284841	-0.0226185	0.00011097	0.000746965	-0.0592912	7.92593e-09	2.43207e-07	-0.185933	2.85711e-10	4.53245e-08	-0.167659
EPHB2_E297_F	Y	EPHB2	NM_004442.5	0.904903	0.931994	-0.000339158	0.28062	0.501784	0.00307713	0.154802	0.254197	-0.00577997	0.00802761	0.0173423	-0.0111477	0.000285055	0.000968396	-0.0412792	0.00115761	0.00471641	-0.0331982
EPHB2_P165_R	Y	EPHB2	NM_004442.5	0.498402	0.585576	-0.00372676	0.241416	0.470578	0.0116036	0.00522936	0.0152674	-0.0233886	0.000757303	0.00270516	-0.0392899	0.00153718	0.00355054	-0.0814589	0.746443	0.858186	0.0107921
EPHB3_E0_F	Y	EPHB3	NM_004443.3	0.157016	0.246099	0.00647723	0.287184	0.508772	0.00292581	0.00872538	0.0233807	-0.01905	0.000119758	0.000782761	-0.0334199	0.000286232	0.000968396	-0.043948	3.08482e-06	3.56262e-05	-0.0421481
EPHB3_P569_R	Y	EPHB3	NM_004443.3	0.283875	0.384947	0.0624058	0.176463	0.40588	-0.0231469	2.67338e-06	3.73301e-05	-0.0558812	0.0162349	0.031249	-0.0411304	0.00227075	0.00494733	-0.0579643	0.0077208	0.0244519	-0.0497125
EPHB4_E476_R	Y	EPHB4	NM_004444.4	0.193742	0.286693	-0.0110128	0.0491157	0.21932	-0.0158313	0.468458	0.578883	0.0442755	0.0123544	0.0245808	-0.0591387	0.0917223	0.127892	-0.0599512	0.000350686	0.0016545	-0.086963
EPHB4_P313_R	Y	EPHB4	NM_004444.4	0.018977	0.0447066	-0.0402271	0.5412	0.717861	-0.0212753	2.99348e-07	7.07382e-06	-0.107458	0.00117388	0.00383197	-0.0949154	0.00515443	0.00990889	-0.127563	0.0105076	0.032348	-0.0987044
EPHB6_E342_F	Y	EPHB6	NM_004445.2	0.141114	0.226253	0.0502834	0.179228	0.408449	-0.00844175	0.222221	0.335956	0.0293002	0.483896	0.562227	0.016262	0.000611019	0.00169409	0.229479	0.491807	0.659476	0.040509
EPHB6_P827_R	Y	EPHB6	NM_004445.2	0.00287461	0.00910393	-0.0376534	0.00718811	0.0641915	-0.0349212	0.5007	0.605094	-0.0039447	0.00543056	0.0127543	-0.0166517	0.0260936	0.0415765	-0.0179467	0.0857843	0.175452	-0.0113316
EPHX1_E152_F	N	EPHX1	NM_000120.2	0.232733	0.328624	-0.0702482	5.14347e-05	0.00143643	-0.295693	4.16592e-06	5.28831e-05	0.254602	0.921913	0.94549	-0.006098	0.00785191	0.0143407	0.18259	0.0294728	0.0751998	0.17774
EPHX1_P1358_R	N	EPHX1	NM_000120.2	0.00119202	0.00424814	-0.143621	0.233052	0.460764	-0.0513038	0.0156263	0.0386506	0.0843412	0.0499822	0.0814996	0.0932056	7.89252e-07	1.13298e-05	0.209155	0.0110551	0.0334266	0.149855
EPHX1_P22_F	N	EPHX1	NM_000120.2	0.44272	0.536715	-0.0202308	0.140109	0.380899	-0.0766573	2.34714e-08	1.12663e-06	0.245971	0.0755672	0.116304	0.118477	0.0525824	0.0785667	0.1147	0.559979	0.711356	0.0384225
EPM2A_P113_F	Y	EPM2A	NM_001018041.1	0.805958	0.861139	-0.0183598	1.62948e-05	0.000490761	-0.13987	0.905128	0.930574	0.00323428	0.0843723	0.128186	-0.0471653	0.162727	0.214548	-0.0503688	0.0381325	0.0920936	-0.0722571
EPM2A_P64_R	Y	EPM2A	NM_001018041.1	0.105717	0.181229	0.00617996	0.415146	0.627005	0.00224608	1.1327e-05	0.000116421	-0.0166209	2.24635e-05	0.000289949	-0.0234012	0.00551236	0.0104919	-0.0298458	0.000234022	0.00116707	-0.0316264
EPO_E244_R	Y	EPO	NM_000799.2	0.134929	0.219313	0.0114986	0.234538	0.462451	0.0069856	0.262777	0.381859	-0.0206756	0.00140501	0.00429046	-0.0367458	0.0972223	0.135266	0.133819	8.16243e-06	7.4628e-05	-0.0552803
EPO_P162_R	Y	EPO	NM_000799.2	0.975262	0.980368	0.000784873	0.610457	0.77151	0.0114908	8.75937e-06	9.74956e-05	-0.103354	0.00590946	0.013629	-0.0990695	4.77965e-05	0.000258076	-0.148942	3.32361e-05	0.000222929	-0.121872
EPS8_E231_F	Y	EPS8	NM_004447.4	0.101969	0.175194	-0.0126689	0.398125	0.613976	-0.0105444	8.54769e-05	0.000556324	-0.0462656	0.00370733	0.00927436	-0.0501489	1.85263e-05	0.000129057	-0.106953	7.65636e-07	1.40847e-05	-0.0951697
EPS8_P437_F	Y	EPS8	NM_004447.4	8.27301e-09	9.20822e-08	0.596139	0.072324	0.27362	-0.0510287	0.628068	0.712491	-0.0189719	0.00643884	0.0144592	-0.0707788	0.00172814	0.00390931	-0.0728272	0.000535436	0.002444	-0.0674647
ERBB2_P59_R	Y	ERBB2	NM_001005862.1	0.376015	0.474894	0.00180444	0.194728	0.42668	0.00278163	4.39747e-05	0.000327889	-0.0103147	8.7307e-05	0.000633934	-0.0143843	0.000286215	0.000968396	-0.0213593	0.000240189	0.0011901	-0.0166824
ERBB3_E331_F	Y	ERBB3	NM_001982.2	0.00785599	0.0209493	0.268619	0.0116851	0.0865646	-0.0267903	0.280774	0.40118	0.0413536	0.0387301	0.0658798	-0.0342236	4.68784e-05	0.000256247	0.553206	0.226401	0.381725	0.121977
ERBB3_P870_R	Y	ERBB3	NM_001982.2	0.0225293	0.0512666	0.208751	0.320306	0.540056	0.0128194	0.334585	0.452396	0.0338579	0.299178	0.380108	-0.0200894	0.121879	0.165816	0.101953	0.293129	0.466576	-0.03636
ERBB4_P255_F	Y	ERBB4	NM_005235.1	0.14063	0.225713	0.0725852	0.0861712	0.300034	-0.0102194	0.770009	0.828766	0.00654837	0.00744572	0.0163201	-0.0228046	0.00503643	0.00970635	-0.0324272	0.00693464	0.0224717	-0.0251927
ERBB4_P541_F	Y	ERBB4	NM_005235.1	0.231613	0.327586	0.0835625	0.0488009	0.21932	-0.0188117	0.21093	0.321737	0.0624985	0.00637826	0.0143441	-0.0200687	0.0026003	0.00550906	-0.0284582	0.00165839	0.00653151	-0.0215006
ERCC1_P354_F	Y	ERCC1	NM_001983.2	0.132679	0.216803	0.00394009	0.723349	0.854665	-0.000796495	0.00011726	0.000703691	-0.0136594	0.000146137	0.000873407	-0.0199771	0.00135156	0.00320865	-0.035677	3.31274e-06	3.79728e-05	-0.0400485
ERCC1_P440_R	Y	ERCC1	NM_001983.2	0.338757	0.436519	0.0389156	0.31235	0.534861	-0.0103341	0.660922	0.741389	-0.00948783	0.0912194	0.136072	-0.0307676	0.224434	0.283963	-0.0201558	0.181806	0.319878	-0.0229165
ERCC3_P1210_R	N	ERCC3	NM_000122.1	0.809882	0.863874	-0.00149258	0.328344	0.549386	-0.0151047	0.0106537	0.0279728	0.0179902	0.0285407	0.050447	0.0245264	0.00246594	0.00529007	0.0714673	0.554537	0.707857	0.0180194
ERCC6_P698_R	Y	ERCC6	NM_000124.1	0.0030703	0.00968375	0.349589	0.589142	0.753962	-0.0157229	0.605525	0.693002	0.0313821	6.2017e-05	0.000520536	-0.174512	0.827764	0.855158	0.0126271	0.603452	0.7453	0.03652
ERG_E28_F	Y	ERG	NM_004449.3	1.72328e-06	1.16606e-05	0.574364	0.0457847	0.211823	-0.0808001	0.000156694	0.000872038	0.322042	0.049919	0.0814879	0.187849	0.00092219	0.00236475	0.388567	0.33002	0.507418	0.0464087
ERG_P46_F	Y	ERG	NM_004449.3	0.000422485	0.0017305	0.423268	0.00926057	0.0756609	-0.0561509	0.0369914	0.0796898	0.112307	0.394167	0.477958	0.0656897	5.17011e-07	8.0215e-06	0.642812	0.0430707	0.101467	0.185691
ERN1_P809_R	Y	ERN1	NM_001433.2	0.0192383	0.0451544	0.100648	7.80901e-06	0.000272605	-0.453243	1.55601e-08	8.85194e-07	0.379172	3.37393e-09	2.39534e-06	0.530105	3.71401e-05	0.000214463	0.189306	0.847179	0.914438	0.01038
ER_seq_a1_S60_F	Y	ESR1	NM_000125.2	0.280678	0.3822	0.0491841	0.00280488	0.0331407	-0.0450496	0.0421996	0.0887925	0.119602	0.412303	0.495926	0.0337712	0.655317	0.705867	0.0311665	0.754988	0.862754	-0.01569
ESR1_E298_R	Y	ESR1	NM_000125.2	0.818698	0.870799	0.00480524	0.0102836	0.0793746	-0.0384748	0.133349	0.225826	0.098113	0.0765467	0.117576	-0.0419234	7.88913e-05	0.000376326	-0.109697	0.819515	0.902895	0.012516
ESR1_P151_R	Y	ESR1	NM_000125.2	0.0507898	0.0986259	0.183341	0.825982	0.914133	0.0118929	0.00366532	0.0114662	0.285921	0.865708	0.9009	-0.0131385	0.358243	0.427221	0.0220263	0.143566	0.266005	0.0903271
ESR2_E66_F	Y	ESR2	NM_001437.1	1.52304e-25	7.79795e-23	0.778378	0.00954745	0.0763796	-0.0471962	0.000252754	0.00127289	0.334469	0.819786	0.863643	0.0125076	0.0797324	0.113608	0.210522	0.88611	0.932875	-0.00554177
ESR2_P162_F	Y	ESR2	NM_001437.1	2.34473e-24	7.20301e-22	0.740262	0.111494	0.339793	-0.0296862	7.72196e-05	0.0005138	0.318439	0.748792	0.800936	0.0187004	9.66034e-05	0.000431688	0.55653	0.169239	0.30262	0.110109
ETS1_E253_R	Y	ETS1	NM_005238.2	0.000106193	0.000492787	-0.0494954	0.706595	0.843957	0.0141091	0.365172	0.478996	-0.0419788	0.0197465	0.036455	-0.0825492	2.69894e-06	2.85901e-05	-0.270639	5.38837e-08	1.76096e-06	-0.240617
ETS1_P559_R	Y	ETS1	NM_005238.2	0.00525335	0.0151108	0.0068305	0.270621	0.494969	0.00587576	0.202193	0.312443	0.0651038	0.00112769	0.00370114	-0.00940451	0.000231739	0.000827792	-0.025534	9.36241e-06	8.14601e-05	-0.0227045
ETS2_P684_F	Y	ETS2	NM_005239.4	1.29247e-24	4.96307e-22	0.775704	0.490218	0.682042	0.0451434	0.000611953	0.00263274	0.32199	0.491174	0.568528	0.0262976	3.36391e-05	0.00020027	-0.0393896	0.47913	0.649552	0.0234471
ETS2_P835_F	Y	ETS2	NM_005239.4	1.06206e-21	9.59606e-20	0.656859	0.801479	0.904535	0.0247724	3.01326e-11	1.54279e-08	0.593449	0.135222	0.192298	0.100232	0.991426	0.991426	-0.000290428	0.178942	0.315926	0.100826
ETV1_P235_F	N	ETV1	NM_004956.3	0.225359	0.321015	-0.0102183	0.483159	0.677682	0.0199048	0.000256036	0.0012852	-0.047672	0.00619758	0.0140405	-0.0558771	0.000550951	0.00157062	-0.059697	1.54761e-06	2.26394e-05	-0.063662
ETV1_P515_F	Y	ETV1	NM_004956.3	0.0741457	0.133202	-0.0205906	0.668764	0.816762	-0.00681427	2.26852e-06	3.26211e-05	-0.07046	0.000683578	0.00251793	-0.0739737	7.42284e-07	1.0963e-05	-0.247288	3.54097e-10	4.53245e-08	-0.234363
ETV6_E430_F	Y	ETV6	NM_001987.3	0.144806	0.23025	-0.0145001	0.879099	0.940317	0.00211167	0.0164485	0.0402852	-0.0243284	0.215806	0.285266	-0.0244825	0.604475	0.658925	-0.0187127	0.847946	0.914438	-0.0067469
EVI1_E47_R	Y	EVI1	NM_005241.1	1.6373e-07	1.36923e-06	0.635499	0.348827	0.568456	-0.0522369	0.224734	0.339393	0.0767471	0.049922	0.0814879	-0.0348547	0.249675	0.311789	0.0895082	0.0543306	0.121473	0.169882
EVI1_P30_R	Y	EVI1	NM_005241.1	1.62548e-07	1.36923e-06	0.497893	0.115723	0.347849	-0.0775207	0.090644	0.164882	0.108106	0.144794	0.203761	-0.0420097	0.083276	0.117674	0.200413	0.213939	0.364692	0.0829127
EVI2A_E420_F	N	EVI2A	NM_001003927.1	0.900364	0.931285	-0.00128059	0.267502	0.494969	-0.0227742	0.456851	0.56682	0.00851883	0.280023	0.358729	0.0138844	0.280308	0.346324	0.117092	3.34172e-09	2.33313e-07	0.373961
EVI2A_P94_R	N	EVI2A	NM_001003927.1	0.781727	0.8385	-0.00411775	0.237289	0.465533	-0.0497926	0.883919	0.914276	-0.0024595	0.386888	0.471634	0.0122342	0.0198616	0.0328744	0.238821	2.36036e-05	0.000167848	0.399339
EXT1_E197_F	Y	EXT1	NM_000127.2	0.376267	0.474894	-0.00623646	0.527294	0.711083	-0.00549976	3.08432e-05	0.000248037	-0.033531	5.90651e-05	0.000509113	-0.0472768	2.072e-05	0.000138374	-0.0799079	0.00500467	0.0171207	-0.069481
EYA4_E277_F	Y	EYA4	NM_004100.2	0.00472738	0.0138574	0.324574	0.0111207	0.0841448	-0.0793425	7.52173e-06	8.49513e-05	-0.0625527	0.000209476	0.0010907	-0.0729378	0.000536158	0.00154886	-0.0907314	0.64055	0.779514	-0.0261206
EYA4_P508_F	Y	EYA4	NM_004100.2	7.82511e-13	1.69287e-11	0.555164	0.68818	0.833631	0.0244035	0.00166071	0.00598793	-0.0430899	0.000267296	0.00129722	-0.0675916	0.006514	0.0121279	0.335899	0.469269	0.640157	0.039852
EYA4_P794_F	Y	EYA4	NM_004100.2	5.02765e-05	0.000249112	0.199368	0.287746	0.508772	0.0839708	0.118737	0.204921	0.0980373	0.189243	0.255653	-0.126953	8.09343e-07	1.14825e-05	0.418105	0.00697206	0.0224981	0.201423
F2R_P839_F	Y	F2R	NM_001992.2	3.98406e-08	3.89778e-07	0.193113	0.227986	0.455973	0.0653099	0.00825717	0.0223686	0.124484	0.0869067	0.131128	0.0912789	1.84334e-07	3.41129e-06	0.489527	0.000219507	0.00110545	0.289561
F2R_P88_F	Y	F2R	NM_001992.2	0.281427	0.38288	0.0718076	0.579611	0.746377	-0.0112877	0.00110685	0.00423755	-0.0547628	0.000224643	0.00115402	-0.0749916	0.131075	0.177072	-0.0374136	0.308213	0.484065	-0.0243002
FABP3_E113_F	Y	FABP3	NM_004102.3	1.65774e-08	1.73217e-07	0.449233	0.086273	0.300034	-0.0671155	0.00213676	0.00734242	0.203742	0.530756	0.606127	-0.0410909	0.0143947	0.0245125	0.27139	0.120855	0.230601	0.135352
FABP3_P598_F	Y	FABP3	NM_004102.3	1.90356e-14	4.7159e-13	0.540306	0.38694	0.604004	-0.0101108	7.85624e-07	1.49227e-05	0.224653	0.000367468	0.00162193	-0.0643281	0.00227994	0.00496032	-0.0707443	0.929156	0.959278	-0.00608019
FANCA_P1006_R	Y	FANCA	NM_001018112.1	0.194913	0.288061	-0.018227	0.675213	0.820512	-0.00731713	8.05463e-08	2.57395e-06	0.0983997	8.61394e-07	4.90038e-05	0.133128	0.00211768	0.0046668	0.166244	1.06235e-06	1.69975e-05	0.201445
FANCE_P356_R	Y	FANCE	NM_021922.2	3.16188e-16	9.3397e-15	0.657499	0.0548762	0.230931	-0.0527429	0.262176	0.381347	0.0589348	0.01227	0.0244445	-0.053382	2.2373e-05	0.000146234	-0.0855415	0.0214183	0.0577166	-0.0575274
FANCF_P13_F	Y	FANCF	NM_022725.2	0.469204	0.560404	0.00140378	0.0816502	0.292292	0.00514564	0.0474163	0.098554	-0.00573465	0.00832824	0.0179162	-0.009678	0.000885108	0.00227726	-0.0410161	1.89843e-05	0.000141553	-0.0396789
FANCG_E207_R	Y	FANCG	NM_004629.1	0.189945	0.282983	0.00847187	0.151692	0.387543	0.0116223	1.69876e-06	2.59243e-05	-0.032344	7.09111e-05	0.00055929	-0.0381187	0.00219906	0.00481161	-0.0313232	8.06376e-05	0.000467394	-0.0334775
FASLG_P687_F	N	FASLG	NM_000639.1	0.10866	0.184428	-0.166592	0.139831	0.380817	-0.135781	0.490008	0.597818	-0.0860436	0.179101	0.243618	0.151905	0.000507296	0.00150136	-0.484097	0.829239	0.905629	-0.0242415
FASTK_P257_F	Y	FASTK	NM_033015.2	0.390051	0.486616	-0.00406947	0.927887	0.961048	0.00119125	2.68308e-07	6.75608e-06	-0.0283721	6.00515e-05	0.000509608	-0.0328458	0.00015502	0.000624961	-0.0335446	3.28346e-05	0.000221202	-0.028538
FASTK_P598_R	Y	FASTK	NM_033015.2	0.0422242	0.0848904	-0.123058	0.223989	0.451408	-0.079277	3.01955e-08	1.32515e-06	-0.267426	2.63478e-06	8.25923e-05	-0.252936	0.0420967	0.064211	-0.196931	0.617875	0.759245	0.0469581
FAS_P322_R	N	FAS	NM_000043.3	0.0103097	0.0266594	0.236358	0.0117223	0.0865646	-0.034865	5.52645e-09	5.57935e-07	0.390678	0.0439482	0.0736144	0.0937161	0.0312418	0.0490168	0.13617	0.773617	0.871809	-0.0235681
FAS_P65_F	Y	FAS	NM_000043.3	0.000623321	0.00237573	0.444203	0.420958	0.63043	-0.0129063	0.10368	0.183682	0.0913477	0.555352	0.627221	-0.0214259	1.05793e-10	6.49991e-09	0.590621	0.838792	0.91052	-0.0182584
FAT_P279_R	Y	FAT	NM_005245.3	0.811323	0.864811	-0.00249402	0.731698	0.861878	0.00555989	0.000628274	0.00268335	-0.0539638	0.00990253	0.0204992	-0.0600962	0.000167601	0.000661787	-0.0751381	0.202328	0.349185	-0.0437235
FAT_P973_R	Y	FAT	NM_005245.3	0.847991	0.894856	0.0103499	0.361186	0.578501	-0.0190688	0.00179652	0.00637289	-0.0496205	0.0161751	0.0311732	-0.0562743	0.150033	0.199352	-0.0313004	0.506068	0.669527	0.0306533
FER_E119_F	N	FER	NM_005246.1	0.512278	0.597464	-0.00321395	0.249035	0.479946	-0.0041452	0.181304	0.2868	0.0843827	0.0137748	0.0270564	-0.0430927	0.000353843	0.00114294	-0.0695227	0.0135447	0.0391665	-0.05353
FER_P581_F	N	FER	NM_005246.1	3.08734e-06	1.95957e-05	0.0864455	0.262972	0.493796	0.0534623	0.0789209	0.147293	0.0158565	0.516715	0.592294	0.0118689	3.63968e-07	6.07668e-06	0.102306	0.562469	0.712726	0.0232213
FES_E34_R	Y	FES	NM_002005.2	0.00357129	0.011015	0.27961	0.69658	0.839267	0.0033029	0.000155439	0.000868199	0.328815	0.695228	0.754146	-0.0258541	1.24358e-16	3.82027e-14	0.829837	0.150789	0.276401	0.136674
FES_P223_R	Y	FES	NM_002005.2	0.000192419	0.000844445	0.419993	0.467256	0.66547	-0.0093293	0.000396217	0.00185545	0.216801	0.349986	0.435286	-0.0661303	7.59136e-13	8.32881e-11	0.751106	0.202005	0.34902	0.118201
FGF12_E61_R	Y	FGF12	NM_021032.2	0.0192553	0.0451544	-0.0300285	0.591094	0.755341	-0.0119005	4.49051e-06	5.54204e-05	-0.0869703	0.0115102	0.023141	-0.0666815	0.00117108	0.0028643	-0.0774311	0.000626075	0.0027874	-0.0632935
FGF12_P210_R	Y	FGF12	NM_021032.2	0.560161	0.641138	0.00372686	0.350241	0.568456	0.00967049	0.0013404	0.00495188	-0.028776	0.00172125	0.00504551	-0.037099	0.00102363	0.00258177	-0.0636911	0.4893	0.659268	-0.0242218
FGF1_E5_F	N	FGF1	NM_033136.1	2.1541e-06	1.41397e-05	0.15757	6.00422e-05	0.00158451	-0.287814	0.0951302	0.172292	-0.0675133	1.99751e-07	2.04545e-05	-0.45545	2.88048e-05	0.000179854	0.419364	0.00472631	0.0163874	0.261091
FGF1_P357_R	N	FGF1	NM_033136.1	2.92275e-05	0.000151667	0.25158	4.57362e-07	2.60188e-05	-0.312091	0.210044	0.32146	-0.0637443	7.78604e-09	2.39534e-06	-0.463691	0.0014821	0.00344925	0.366682	0.0119729	0.0355025	0.211186
FGF2_P153_F	Y	FGF2	NM_002006.3	0.0676485	0.124144	-0.0558349	0.511434	0.700479	-0.0299272	0.78971	0.841189	-0.0139118	5.22465e-05	0.000473901	-0.160472	0.824408	0.853296	-0.00536967	0.0107292	0.0328829	0.108897
FGF2_P229_F	Y	FGF2	NM_002006.3	0.0711829	0.129546	-0.0204079	0.399842	0.615096	-0.0110631	0.928177	0.946666	0.00460286	0.00132593	0.00414793	-0.106598	0.00912975	0.0164593	-0.0414915	0.576902	0.725141	-0.0139042
FGF3_E198_R	Y	FGF3	NM_005247.2	0.0101111	0.02619	0.172963	0.703922	0.842731	-0.00118405	5.97643e-05	0.000426967	-0.0116433	0.00189215	0.00539211	-0.0123715	0.682465	0.730499	-0.00653234	5.35438e-06	5.30602e-05	-0.0216531
FGF3_P171_R	Y	FGF3	NM_005247.2	7.78161e-13	1.69287e-11	0.627694	0.0269708	0.154579	-0.0450488	0.00357623	0.0112563	-0.0226363	0.00754872	0.0164934	-0.0279203	0.0418041	0.0638916	-0.019211	0.450416	0.622717	-0.00900193
FGF5_E16_F	Y	FGF5	NM_004464.3	0.0282686	0.0620294	0.186433	0.00500157	0.0498858	-0.0283065	0.00259448	0.00860717	-0.0264422	0.000820454	0.00287237	-0.0364529	0.000576034	0.00161753	-0.0636268	0.000103329	0.00057505	-0.0632081
FGF5_P238_R	Y	FGF5	NM_004464.3	0.184266	0.27694	0.0797969	0.215738	0.443615	-0.00506794	0.000238896	0.00122315	-0.0142421	0.000440413	0.00186356	-0.0194795	2.51597e-05	0.000161022	-0.0404151	0.868997	0.92673	-0.00610389
FGF6_E294_F	Y	FGF6	NM_020996.1	0.0028025	0.00891228	-0.0830832	0.269412	0.494969	-0.023549	0.268122	0.388525	0.0113507	0.143868	0.202921	-0.0526435	6.34964e-05	0.000315632	0.124372	0.152548	0.278386	0.0835045
FGF6_P139_R	Y	FGF6	NM_020996.1	0.0408038	0.0830128	-0.0594605	0.367038	0.583614	-0.0315813	0.15158	0.251162	0.0187718	0.921217	0.94549	-0.00211668	9.82718e-05	0.000433751	0.0988691	1.01323e-06	1.67346e-05	0.0944819
FGF7_P44_F	N	FGF7	NM_002009.2	0.00162231	0.00553749	0.132168	0.0164184	0.111095	0.120231	0.0813497	0.15091	-0.041534	0.145916	0.205057	-0.03911	0.306998	0.375105	0.100198	0.154627	0.281406	0.130769
FGF7_P610_F	N	FGF7	NM_002009.2	0.000653517	0.00247242	0.0459959	0.768191	0.881211	-0.00844647	0.298671	0.420133	-0.0091105	0.0596881	0.0949078	-0.0251604	1.25397e-07	2.40762e-06	0.235775	0.000194845	0.00100094	0.164122
FGF8_E183_F	Y	FGF8	NM_006119.2	0.0217522	0.0497934	0.0265023	0.536557	0.715719	0.00160256	0.114896	0.199864	-0.0069364	0.00995776	0.020558	-0.0117069	0.000719177	0.00192443	-0.0285199	1.8e-05	0.000136197	-0.0272375
FGF8_P473_F	Y	FGF8	NM_006119.2	0.0392961	0.0804783	0.122672	0.910193	0.956917	0.000366444	0.0686242	0.131578	0.0492248	0.00189069	0.00539211	-0.0181297	0.0650464	0.095063	-0.0160602	0.0073062	0.0233312	-0.0188717
FGF9_P1404_F	Y	FGF9	NM_002010.1	0.0216085	0.0495993	-0.0230086	0.23519	0.46255	0.0210043	5.87448e-08	2.09842e-06	-0.114979	0.000657516	0.00245374	-0.0991611	0.0823014	0.116835	-0.0490486	0.0424554	0.10048	-0.0482316
FGF9_P862_R	Y	FGF9	NM_002010.1	0.848845	0.894856	0.00593103	0.947077	0.969807	0.00192512	1.22097e-08	8.52462e-07	-0.158615	4.60703e-06	0.000105618	-0.174837	2.19142e-09	8.41505e-08	-0.364779	9.59473e-13	4.9125e-10	-0.368021
FGFR1_E317_F	Y	FGFR1	NM_000604.2	0.162863	0.25294	-0.00471943	0.157215	0.389546	-0.0053711	2.03543e-05	0.000184995	-0.0227302	0.000244457	0.00122124	-0.0283974	0.000503022	0.00149159	-0.0380795	0.000164509	0.000865362	-0.0310746
FGFR1_P204_F	Y	FGFR1	NM_000604.2	0.0255984	0.0569017	-0.0145802	0.079301	0.286603	-0.0139411	5.13363e-06	6.25814e-05	-0.065268	4.28808e-06	0.000101331	-0.0896344	0.520222	0.58011	-0.0191554	3.62473e-06	4.03449e-05	-0.0724718
FGFR2_P266_R	Y	FGFR2	NM_023030.1	0.342416	0.439758	-0.00593958	0.181791	0.411444	-0.00902856	0.0258503	0.0585635	-0.0192386	0.000156268	0.000912654	-0.0314874	0.173268	0.227275	-0.0641521	0.00494567	0.0169945	-0.080107
FGFR2_P460_R	Y	FGFR2	NM_023030.1	0.408336	0.503374	0.0310344	0.415847	0.627447	-0.0194245	0.0716992	0.136131	0.113264	0.93583	0.953206	-0.003775	0.111435	0.152961	0.163795	0.340394	0.517668	0.0863675
FGFR3_E297_R	Y	FGFR3	NM_022965.1	0.124405	0.205248	0.0249476	0.609158	0.77073	0.00237802	0.291524	0.413779	0.0571439	0.00258371	0.00683061	-0.0178507	0.974856	0.978039	-0.000639881	0.0932794	0.187522	-0.0225765
FGFR3_P1152_R	Y	FGFR3	NM_022965.1	1.20672e-15	3.37004e-14	0.352124	0.441704	0.643087	0.0702218	0.653876	0.73633	0.0298846	0.0410177	0.0693868	-0.13767	2.9522e-10	1.74407e-08	0.564521	0.014732	0.0421385	0.229666
FGFR4_P610_F	N	FGFR4	NM_213647.1	0.264023	0.362413	-0.0320351	0.00922061	0.0756609	-0.121593	0.372865	0.48618	0.0128895	0.0392958	0.0666943	0.0283067	0.448764	0.510594	0.0470448	0.24029	0.399875	0.0521583
FGR_P39_F	N	FGR	NM_005248.1	0.00552362	0.0156826	-0.119196	0.126274	0.361804	-0.0323015	0.153453	0.252863	-0.0367597	0.0628294	0.0992859	-0.0668122	6.06639e-05	0.000306991	0.068014	2.69736e-08	1.2247e-06	0.0738776
FHIT_E19_R	Y	FHIT	NM_002012.1	0.676467	0.748597	0.0196868	0.131874	0.368112	-0.00694824	6.09374e-05	0.000433095	-0.0141084	0.000292665	0.00137548	-0.0175047	0.000200897	0.000760042	-0.0438555	0.249932	0.411464	-0.0236725
FHIT_P93_R	Y	FHIT	NM_002012.1	0.84925	0.894856	-0.00188773	0.341816	0.564134	-0.00470558	0.000134711	0.000783774	-0.0287183	0.000723905	0.00260402	-0.0368056	0.00101657	0.00257122	-0.0380864	0.202692	0.349422	-0.0195591
FHL1_E229_R	Y	FHL1	NM_001449.3	0.206158	0.300151	-0.0718337	0.372005	0.589073	-0.0561316	0.272066	0.392388	-0.0511743	0.898258	0.927857	-0.00782998	0.24659	0.30869	-0.0420061	0.0570343	0.12678	0.106998
FHL1_P768_F	Y	FHL1	NM_001449.3	0.00521248	0.0150213	0.252015	0.472518	0.669968	-0.0607952	0.207522	0.318753	-0.0697974	0.17908	0.243618	-0.0957661	0.777597	0.815066	-0.0143152	0.65558	0.79289	0.0256066
FLI1_E29_F	Y	FLI1	NM_002017.2	1.55083e-09	2.00174e-08	0.611047	0.151891	0.387543	-0.0304428	0.000209604	0.00108897	-0.0370338	0.789424	0.8374	-0.00429178	1.2e-06	1.5489e-05	-0.0782485	3.4045e-05	0.000227361	-0.0582773
FLI1_P620_R	Y	FLI1	NM_002017.2	8.97985e-18	3.20769e-16	0.679613	0.0595346	0.241311	-0.0363517	0.000630656	0.00268335	-0.0254247	0.000220702	0.00113758	-0.0360416	0.0127362	0.0220549	-0.0511401	0.0120519	0.0356681	-0.0414311
FLJ20712_P984_R	N	FLJ20712	XM_940022.1	0.0436468	0.08718	-0.0496868	0.469176	0.666656	-0.0394736	0.661495	0.741389	0.0086045	0.134418	0.191478	0.0485311	9.58487e-05	0.000431077	0.265667	0.311677	0.488008	0.0952264
FLT1_E444_F	Y	FLT1	NM_002019.2	0.800939	0.857311	0.00110813	0.347976	0.568456	-0.00330511	0.00734701	0.0202968	-0.0163117	0.0013129	0.00411714	-0.0248545	0.210805	0.26871	-0.014741	0.757264	0.863517	-0.00840867
FLT1_P302_F	Y	FLT1	NM_002019.2	0.10448	0.179309	0.0424735	0.252721	0.484015	0.0124172	0.0139085	0.0348506	-0.0246841	0.00065977	0.00245377	-0.0396235	0.00176462	0.00397427	-0.0321657	0.342768	0.520248	0.0551162
FLT1_P615_R	Y	FLT1	NM_002019.2	0.115361	0.19408	0.11015	0.874909	0.938897	-0.00497296	0.000242389	0.00123281	-0.0491974	3.84084e-06	9.67136e-05	-0.0736902	0.545483	0.603646	0.0216375	0.317794	0.495566	0.0391912
FLT3_E326_R	Y	FLT3	NM_004119.1	0.0721207	0.130943	0.134687	0.792707	0.897988	0.00789002	0.583545	0.672917	0.0292467	0.00727463	0.0160313	-0.0474145	0.0050207	0.00969542	0.180683	0.0687109	0.14638	0.135569
FLT3_P302_F	Y	FLT3	NM_004119.1	0.834251	0.883121	-0.00381684	0.127995	0.363901	-0.018662	0.992289	0.99423	-0.000248733	3.53917e-05	0.000393925	-0.0309573	3.01896e-06	3.08921e-05	-0.075305	0.0999621	0.198347	-0.0374044
FLT4_E206_F	Y	FLT4	NM_002020.1	0.18538	0.278071	0.0210618	0.331341	0.552449	0.0219556	0.668619	0.745214	-0.0045788	0.365885	0.453225	0.0281046	0.109761	0.151204	0.128728	0.530987	0.688845	0.0254922
FLT4_P180_R	Y	FLT4	NM_002020.1	0.948296	0.962711	0.000910634	0.158696	0.389546	-0.0132063	0.00110905	0.00423755	-0.0282916	5.34269e-05	0.000477115	-0.042422	0.827878	0.855158	0.0130434	3.87386e-06	4.19032e-05	-0.0610309
FMR1_P484_R	Y	FMR1	NM_002024.3	0.889566	0.923943	0.0106287	0.863803	0.935026	0.0164749	0.0104651	0.0275823	0.213516	0.00167382	0.00493473	0.34483	0.00242241	0.00522551	-0.284786	0.0491672	0.112049	-0.127438
FMR1_P62_R	Y	FMR1	NM_002024.3	0.218636	0.314148	-0.13743	0.201922	0.435606	-0.137557	0.308894	0.428214	-0.100364	0.953739	0.965048	-0.00752679	0.628594	0.680429	-0.033773	0.0574786	0.127398	0.162551
FN1_E469_F	Y	FN1	NM_054034.2	0.0824146	0.144431	0.100386	0.716089	0.849354	0.00319112	0.0149915	0.0373209	-0.0494194	7.03311e-05	0.00055929	-0.0918006	0.0140465	0.0240528	-0.023113	0.0593156	0.130342	-0.0216295
FN1_P229_R	Y	FN1	NM_054034.2	0.383925	0.481395	0.0250791	0.285671	0.507181	0.0222099	4.51012e-06	5.54204e-05	-0.121656	0.000189728	0.00104453	-0.133473	0.0271234	0.0429058	-0.0538166	0.178219	0.315374	-0.0315183
FOLR1_E368_R	N	FOLR1	NM_000802.2	0.275083	0.37558	-0.0155547	0.0395256	0.196477	-0.0883916	9.07843e-05	0.000578609	0.034133	0.0378187	0.0644722	0.0272331	0.000418653	0.00129909	0.1046	0.929493	0.959278	0.00648857
FOSL2_E384_R	Y	FOSL2	NM_005253.3	0.72709	0.793752	-0.0255246	0.0595902	0.241311	-0.149322	1.44702e-09	2.22263e-07	-0.475347	1.00086e-05	0.000167099	-0.510159	5.85309e-08	1.36217e-06	-0.508	3.73909e-06	4.07322e-05	-0.403885
FRK_P258_F	N	FRK	NM_002031.2	0.0837078	0.146441	0.0323011	0.00408605	0.0426951	-0.263109	0.00223832	0.00765716	-0.097531	0.344291	0.428583	0.0341496	0.000207168	0.000776122	0.122085	0.423602	0.600233	-0.0660454
FRK_P36_F	N	FRK	NM_002031.2	0.0744853	0.133344	0.0576305	0.000775005	0.0125306	-0.327516	0.00665502	0.0185183	-0.0906348	0.442042	0.524711	-0.0373182	0.0359506	0.0556094	0.167183	0.480125	0.650328	0.0533551
FRZB_E186_R	Y	FRZB	NM_001463.2	1.57321e-07	1.34247e-06	0.627895	0.00142063	0.0198372	-0.0735321	0.00421443	0.0128695	0.238624	0.945778	0.96079	0.00362475	6.10561e-17	3.82027e-14	0.844659	0.159365	0.288661	0.136276
FRZB_P406_F	Y	FRZB	NM_001463.2	4.2732e-08	4.12807e-07	0.656909	0.00433702	0.044411	-0.0469862	0.0252937	0.0575998	0.150298	0.00630531	0.0142217	-0.011627	0.00101777	0.00257122	0.443442	0.350361	0.52968	0.053658
FVT1_P225_F	Y	FVT1	NM_002035.1	0.713582	0.782626	0.00130339	0.291139	0.509908	0.0362557	0.00657321	0.0183864	-0.0144876	0.671888	0.734182	0.0105603	0.000700696	0.00188488	-0.153651	6.78722e-06	6.39581e-05	-0.149796
FYN_P352_R	Y	FYN	NM_153048.1	0.25834	0.357165	0.00295569	0.17678	0.40588	0.0109744	0.000970274	0.00383121	-0.0145289	0.269987	0.34674	-0.010333	7.35237e-05	0.000358515	-0.0606258	1.72556e-07	4.07763e-06	-0.0601375
FZD7_E296_F	Y	FZD7	NM_003507.1	0.328953	0.428196	0.0338594	0.0298857	0.166683	0.00789843	0.340627	0.458547	0.065038	5.56118e-06	0.000110935	-0.0395668	0.443995	0.506293	-0.0142051	0.263188	0.428692	-0.0216272
FZD9_E458_F	Y	FZD9	NM_003508.2	1.27152e-12	2.67541e-11	0.540667	0.121409	0.357494	0.123893	0.314713	0.432673	0.0511612	0.395306	0.478102	0.0476384	1.79774e-08	5.31024e-07	0.639438	0.00167422	0.00656021	0.255894
FZD9_P15_R	Y	FZD9	NM_003508.2	0.173179	0.264417	0.0163029	0.350773	0.568456	0.00655591	0.000320356	0.00155226	-0.0249605	0.00161889	0.00480177	-0.0303824	0.00418059	0.00824311	-0.0440418	0.000250873	0.00123112	-0.0426216
FZD9_P175_F	Y	FZD9	NM_003508.2	0.856497	0.900465	0.00221683	0.348996	0.568456	-0.0132318	0.00658366	0.0183864	-0.0461796	0.00483958	0.0116514	-0.0621237	0.0204096	0.0335644	-0.0501575	0.706059	0.828688	-0.0137986
G6PD_E190_F	Y	IKBKG	NM_003639.2	0.144185	0.229739	-0.108009	0.144947	0.382999	-0.118172	0.491051	0.598562	-0.0455954	0.587618	0.658819	-0.0486816	0.13467	0.181449	-0.0441752	0.0498093	0.113176	0.150673
G6PD_P1065_R	Y	IKBKG	NM_003639.2	0.129929	0.212763	-0.175285	0.16972	0.399874	-0.148525	0.395467	0.509827	-0.0887694	0.891942	0.924442	0.0162315	0.525261	0.584638	-0.040196	0.031419	0.0789845	0.185386
G6PD_P196_F	Y	IKBKG	NM_003639.2	0.283948	0.384947	-0.0774443	0.454651	0.655722	-0.0587087	0.0952316	0.172292	-0.0997599	0.684435	0.745068	-0.0364687	0.00469085	0.00913201	-0.139744	0.433949	0.608717	0.0551761
G6PD_P597_F	Y	IKBKG	NM_003639.2	0.239519	0.335677	-0.125026	0.126053	0.361804	-0.14921	0.214424	0.326417	-0.120924	0.847861	0.886315	0.0229596	0.818334	0.848152	-0.0130058	0.00493123	0.0169829	0.24624
GABRA5_E44_R	N	GABRA5	NM_000810.2	0.00186367	0.00627762	-0.101895	0.458233	0.6578	-0.034233	0.0531297	0.107946	-0.0821563	0.542066	0.615838	-0.0391656	0.00615494	0.0115858	0.106773	0.761318	0.864929	0.0236949
GABRA5_P1016_F	N	GABRA5	NM_000810.2	0.00318302	0.0099778	-0.188626	0.059555	0.241311	-0.124847	0.0142904	0.0357492	-0.103136	0.117371	0.170238	-0.104014	0.793208	0.828822	-0.0108441	0.525529	0.684983	0.030116
GABRA5_P862_R	N	GABRA5	NM_000810.2	0.000176221	0.000780047	-0.235666	0.179985	0.409566	-0.0675274	0.0761126	0.142398	-0.080221	0.0545452	0.0876375	-0.123957	0.395766	0.461226	-0.0363042	0.759945	0.864648	-0.0192292
GABRB3_E42_F	Y	GABRB3	NM_021912.2	0.211466	0.304988	0.0414939	0.789575	0.896403	0.00148749	0.919097	0.941155	0.00320963	0.00504816	0.0120778	-0.035498	4.77565e-05	0.000258076	-0.0305765	0.937566	0.960068	0.00233908
GABRB3_P92_F	Y	GABRB3	NM_021912.2	0.889656	0.923943	-0.00486325	0.578016	0.746078	-0.01581	0.556279	0.650757	-0.0283006	0.000289769	0.00136949	-0.0894329	1.73507e-07	3.29021e-06	-0.307189	7.21289e-08	2.05167e-06	-0.24862
GABRG3_E123_R	N	GABRG3	NM_033223.1	0.0131631	0.033359	-0.141555	0.093572	0.31313	-0.0838074	0.395034	0.509827	-0.0379982	0.375062	0.461615	-0.0591564	0.0488949	0.0735579	0.057605	0.94565	0.961933	0.004185
GABRG3_P75_F	N	GABRG3	NM_033223.1	4.18344e-05	0.000209992	-0.314219	0.18937	0.421812	-0.0543324	0.0997011	0.178716	-0.0757155	0.449807	0.531873	-0.0474953	0.0831287	0.117674	-0.0539283	0.994052	0.9947	-0.000376195
GADD45A_P737_R	N	GADD45A	NM_001924.2	7.08334e-05	0.00034	0.328	0.0379052	0.195137	0.184591	0.0655023	0.127761	0.107057	0.615918	0.683563	0.0270158	0.908574	0.921168	-0.00546856	0.0579103	0.128137	-0.0929271
GAGE7B_P686_F	N	GAGE7	NM_021123.1	0.000136231	0.000613637	-0.222301	0.110049	0.337032	-0.118951	0.340116	0.458261	-0.046724	0.0505628	0.0822678	-0.158174	0.0205442	0.033716	-0.0559846	0.00848495	0.0265977	-0.0873339
GALR1_E52_F	Y	GALR1	NM_001480.2	0.0718656	0.130634	-0.00964355	0.932733	0.962822	0.000665238	0.741976	0.805395	0.0136951	0.00244579	0.00656773	-0.0288449	2.00208e-06	2.27792e-05	-0.0730705	0.722875	0.839891	-0.0171237
GALR1_P80_F	Y	GALR1	NM_001480.2	0.474015	0.562884	0.00286959	0.700654	0.84111	0.00154062	0.655086	0.737152	-0.00676743	4.59345e-05	0.000432855	-0.0253663	8.39976e-06	7.28928e-05	-0.0496812	0.0153726	0.0435653	-0.0302788
GAS1_E22_F	Y	GAS1	NM_002048.1	0.343921	0.439997	0.00214668	0.433848	0.635947	0.00221013	0.0900235	0.164029	-0.00597272	0.00051105	0.00209326	-0.0144769	3.39098e-05	0.000201102	-0.0553343	5.81852e-08	1.79177e-06	-0.0547303
GAS1_P754_R	Y	GAS1	NM_002048.1	0.206586	0.300254	0.0024753	0.292421	0.510507	0.00724197	0.00165142	0.00596841	-0.00705468	0.000242422	0.00122085	-0.011654	6.59369e-05	0.000326707	-0.0292996	1.37548e-06	2.08126e-05	-0.0269587
GAS7_E148_F	Y	GAS7	NM_003644.2	0.197559	0.290662	-0.00484737	0.906259	0.955398	0.000814658	3.69119e-05	0.000286347	-0.018417	0.000576667	0.00225384	-0.0201578	0.000332983	0.00108822	-0.0314383	1.29979e-05	0.000103983	-0.0292202
GAS7_P622_R	Y	GAS7	NM_003644.2	6.73693e-05	0.000325406	0.320212	0.00259132	0.0315894	-0.159366	0.825694	0.869867	-0.0158699	0.0267448	0.047823	-0.127483	0.590294	0.646713	0.0228435	0.546386	0.701127	0.0393575
GATA6_P21_R	Y	GATA6	NM_005257.3	0.569685	0.650101	0.00157077	0.484327	0.677953	0.00286241	0.0647842	0.126763	-0.00633697	0.848399	0.886315	0.00182222	0.000189642	0.000722805	-0.0380854	0.142779	0.265185	0.130936
GATA6_P726_F	Y	GATA6	NM_005257.3	1.2212e-06	8.88985e-06	0.530775	0.0268103	0.154322	-0.0593382	0.753922	0.814937	0.0156989	0.546473	0.619928	-0.0103184	0.689451	0.737463	0.0167952	0.247145	0.40775	0.102257
GDF10_E39_F	Y	GDF10	NM_004962.2	0.00470185	0.0138089	0.258592	0.559397	0.7294	-0.0117836	0.534804	0.632378	-0.0259627	0.00103808	0.00345875	-0.0778965	1.32326e-09	5.64589e-08	-0.366341	2.89516e-13	4.44697e-10	-0.340217
GDF10_P95_R	Y	GDF10	NM_004962.2	0.00161984	0.00553749	0.382072	0.00274258	0.0329109	-0.049462	0.158939	0.259713	0.0745182	4.35344e-05	0.00041793	-0.0572548	0.000525593	0.00153117	-0.101673	0.00388107	0.0138314	-0.0813308
GFAP_P1214_F	N	GFAP	NM_002055.2	0.0174066	0.0416457	-0.0746318	0.556995	0.728922	-0.0124446	0.0056375	0.0162378	0.0288003	0.00135435	0.00419411	0.0405564	1.00521e-05	8.25671e-05	-0.406832	0.0235018	0.0624547	-0.194746
GFAP_P56_R	N	GFAP	NM_002055.2	2.73667e-05	0.000143465	-0.320842	0.0259847	0.150613	-0.182094	0.000326536	0.00157723	-0.150168	5.41805e-05	0.000478283	-0.265359	0.023127	0.0375508	-0.144183	0.690158	0.819229	0.0372412
GFI1_E136_F	Y	GFI1	NM_005263.2	1.35437e-18	5.33412e-17	0.642743	0.882163	0.941897	-0.010993	0.127604	0.217535	0.0845544	0.631069	0.695853	-0.0367267	4.87333e-11	3.25454e-09	0.712148	0.00685029	0.0222925	0.303331
GFI1_P208_R	Y	GFI1	NM_005263.2	1.47887e-11	2.61098e-10	0.206881	0.609137	0.77073	-0.0420998	0.151367	0.251162	0.0477463	0.0149523	0.0291086	-0.228222	5.95518e-08	1.36525e-06	0.248628	0.113889	0.220876	0.100304
GFI1_P45_R	Y	GFI1	NM_005263.2	2.29058e-08	2.26989e-07	0.443409	0.401	0.61532	0.0394945	0.217143	0.33023	0.0527586	0.0274102	0.0487336	-0.0129748	1.67049e-06	2.00458e-05	0.608573	0.0216884	0.0581387	0.192734
GJB2_E43_F	Y	GJB2	NM_004004.3	0.326056	0.426595	0.0119169	0.448878	0.649837	0.027434	0.0137323	0.0344655	-0.0196187	0.00545205	0.0127853	-0.0322946	0.226478	0.286078	-0.0349464	0.0339219	0.0836116	-0.0432234
GJB2_P791_R	Y	GJB2	NM_004004.3	0.00367846	0.0112105	0.209117	0.948933	0.97106	-0.00112398	0.00248653	0.00832429	-0.067206	0.0631622	0.0995916	-0.0616871	0.307215	0.375105	0.0852006	0.872032	0.92673	0.00622836
GJB2_P931_R	Y	GJB2	NM_004004.3	5.14271e-08	4.90634e-07	0.242324	0.888215	0.941897	-0.0125539	0.00120315	0.00452949	-0.182825	0.0713117	0.11053	-0.158814	9.86274e-06	8.14471e-05	0.40332	0.214162	0.364692	0.119766
GLA_E47_F	Y	GLA	NM_000169.1	0.423159	0.517494	-0.052977	0.740527	0.866109	-0.0263278	0.645618	0.728097	-0.0326974	0.153146	0.213073	-0.109278	0.778565	0.815185	0.0136065	0.0108812	0.0330226	0.155491
GLA_E98_R	Y	GLA	NM_000169.1	0.109952	0.186217	-0.072033	0.960753	0.974772	0.00335847	0.200268	0.310093	-0.0581045	0.822397	0.864827	-0.013675	0.00443152	0.00870436	-0.0740876	0.362809	0.544214	0.0321027
GLA_P112_F	Y	GLA	NM_000169.1	0.198699	0.291296	-0.150343	0.262026	0.493307	-0.127224	0.305439	0.426504	-0.100705	0.49154	0.568528	-0.0846328	0.864554	0.884124	-0.0126653	0.00214949	0.00829551	0.340202
GLA_P343_R	Y	GLA	NM_000169.1	0.0383336	0.0790341	-0.193582	0.109979	0.337032	-0.151049	0.379367	0.492568	-0.0752006	0.719745	0.775265	-0.0393924	0.114296	0.156191	-0.0495061	0.00498527	0.0170923	0.194286
GLI2_E90_F	N	GLI2	NM_030379.1	0.0661004	0.121739	0.0122773	0.195884	0.428601	-0.0366428	0.0534715	0.108482	-0.051085	0.000232268	0.00118134	-0.292158	0.6125	0.665818	-0.0443931	0.746008	0.858186	0.0202519
GLI2_P295_F	Y	GLI2	NM_030379.1	0.829711	0.879528	0.00282017	0.298151	0.516303	-0.0170137	0.000189311	0.00103114	-0.207129	2.4756e-05	0.000306656	-0.383252	4.7886e-06	4.5403e-05	0.192642	0.000129131	0.000695946	0.13941
GLI3_E148_R	N	GLI3	NM_000168.2	0.349235	0.445535	0.0463124	0.215791	0.443615	-0.111456	0.568802	0.66215	0.00404166	0.0605008	0.0960013	0.0215789	1.03877e-06	1.39961e-05	0.260334	3.517e-10	4.53245e-08	0.254519
GLI3_P453_R	Y	GLI3	NM_000168.2	0.00602514	0.0169189	-0.0290807	0.157042	0.389546	-0.024022	0.0490049	0.101171	0.117947	0.0710577	0.110247	-0.0302217	9.57261e-10	4.45562e-08	0.647825	0.725755	0.8426	0.0199439
GML_E144_F	Y	GML	NM_002066.1	0.878283	0.917102	0.00802893	0.48869	0.681151	-0.0537514	0.449721	0.56206	0.0402568	0.861487	0.897723	-0.0141933	0.0154043	0.0260872	0.189575	6.71989e-05	0.000396991	0.226362
GML_P281_R	N	GML	NM_002066.1	0.000447696	0.00181441	-0.253818	0.0508082	0.22234	-0.1725	0.00563497	0.0162378	-0.170716	0.00122161	0.00392552	-0.288959	0.324903	0.393263	0.0183483	0.178934	0.315926	0.0219233
GNAS_E58_F	Y	GNAS	NM_016592.1	0.000651246	0.00247242	-0.138975	0.304307	0.524597	-0.0478206	0.318057	0.435027	-0.0460222	0.895932	0.926701	-0.00322712	0.0761351	0.109191	-0.150703	0.915572	0.951736	-0.00608952
GNAS_P86_F	Y	GNAS	NM_016592.1	0.0066751	0.0183416	-0.09386	0.627525	0.784202	-0.0219445	0.322712	0.439827	0.0250702	0.258688	0.335029	0.0299125	0.0584531	0.0864971	0.102765	0.00106562	0.00441185	0.152792
GNG7_E310_R	Y	GNG7	NM_052847.1	0.324538	0.424971	-0.00351357	0.166857	0.395514	-0.0210718	0.586648	0.675553	0.00219416	0.0351487	0.0602549	0.00847245	0.000334033	0.00108933	0.0537093	0.000313015	0.00150247	0.04419
GNG7_P903_F	N	GNG7	NM_052847.1	0.0939226	0.163196	-0.0217284	0.0189956	0.121572	-0.159644	1.38604e-06	2.23242e-05	0.11492	4.10312e-06	0.000100038	0.146131	0.00231656	0.00502576	0.14953	0.0808013	0.16704	0.119039
GNMT_E126_F	Y	GNMT	NM_018960.4	1.47642e-09	1.92185e-08	0.528005	0.000110979	0.00266349	-0.0292689	0.25127	0.368741	0.0729635	0.000124485	0.000800035	-0.0256758	1.1387e-11	8.74523e-10	0.700581	0.664973	0.799217	0.0391174
GNMT_P197_F	Y	GNMT	NM_018960.4	7.97159e-23	1.36049e-20	0.684944	0.356961	0.575286	-0.0197728	0.180274	0.28576	0.0957314	1.81621e-05	0.000251325	-0.0984891	1.1735e-16	3.82027e-14	0.715459	0.204723	0.352133	0.111277
GP1BB_E23_F	Y	GP1BB	NM_000407.3	0.00104676	0.00377949	0.187126	0.0330251	0.179246	0.171625	0.346238	0.463018	0.0332362	0.110474	0.161338	0.0856433	0.000121161	0.000519841	0.169169	0.441034	0.615844	-0.0374666
GP1BB_P278_R	Y	GP1BB	NM_000407.3	0.00841599	0.0222879	0.119063	0.0755538	0.278968	0.106581	0.511917	0.612864	-0.026533	0.607907	0.676627	0.033466	0.00439141	0.00863663	0.184507	0.3809	0.560942	0.0551896
GPATC3_P410_R	N	GPATC3	NM_022078.1	0.284531	0.385187	-0.0859347	0.0598565	0.241311	-0.177145	0.713004	0.783947	-0.010655	0.0131452	0.0259192	-0.225475	0.192715	0.248749	-0.136557	0.246027	0.406779	-0.110744
GPC3_E72_F	Y	GPC3	NM_004484.2	0.390306	0.486616	-0.0997484	0.118453	0.350015	-0.164791	0.608624	0.69557	-0.0426482	0.565786	0.637131	0.0694573	0.000864221	0.00223852	-0.180983	0.0812764	0.167722	0.174113
GPC3_P235_R	Y	GPC3	NM_004484.2	0.658173	0.734705	-0.0522025	0.0727083	0.2738	-0.155012	0.165369	0.268791	-0.0976312	0.477925	0.557398	-0.0633637	0.819204	0.848481	-0.0102091	0.00407734	0.0143972	0.25497
GPR116_E328_R	N	GPR116	NM_015234.3	0.22939	0.32474	-0.0117558	0.766077	0.879849	-0.00430565	0.318708	0.435529	-0.0269987	0.00744819	0.0163201	-0.101169	0.00261607	0.00553483	0.0447462	0.00710335	0.0227782	0.0329462
GPR116_P850_F	N	GPR116	NM_015234.3	0.170451	0.261291	-0.0282276	0.342342	0.564202	-0.0243939	0.0172449	0.0419116	-0.0685515	0.184959	0.250306	-0.032102	0.8414	0.866213	0.00650025	0.789562	0.882654	0.0125374
GPX1_E46_R	Y	GPX1	NM_000581.2	0.83175	0.881081	-0.00138921	0.628994	0.784837	0.005018	0.0953716	0.172342	-0.0279378	0.0271693	0.0484693	-0.0422632	1.89685e-05	0.000130653	-0.036164	0.777418	0.873529	-0.00528387
GPX1_P194_F	Y	GPX1	NM_000581.2	0.898797	0.931154	0.00194538	0.10071	0.32409	-0.0237668	0.319906	0.43639	0.0650104	0.000195934	0.00105229	-0.105067	0.000674489	0.00182719	-0.134467	1.65321e-07	3.96769e-06	-0.155823
GPX3_E178_F	Y	GPX3	NM_002084.2	0.0161636	0.0394085	0.177474	0.3732	0.589749	-0.0152971	0.00472542	0.0141486	-0.0543827	0.000174057	0.000981318	-0.0696072	0.000494064	0.00147356	-0.0840789	7.29898e-05	0.000427909	-0.076474
GRB10_E85_R	Y	GRB10	NM_001001555.1	0.385475	0.482158	0.00782181	0.69568	0.839267	0.00247065	0.0486182	0.100508	-0.0231577	0.00191652	0.00544136	-0.0364171	0.541341	0.599496	-0.0129788	0.94211	0.960877	0.00288921
GRB10_P260_F	Y	GRB10	NM_001001555.1	0.144017	0.229739	0.0830595	0.121788	0.35768	-0.0106764	0.29778	0.419742	0.0263188	0.000228295	0.00116887	-0.0321926	0.0661753	0.0964377	0.137251	0.71297	0.833427	0.017084
GRB10_P496_R	Y	GRB10	NM_001001555.1	4.03994e-12	7.66092e-11	0.381208	3.65275e-05	0.001039	-0.257621	0.000662477	0.00279551	0.242435	0.611372	0.679991	-0.048141	5.29261e-07	8.12945e-06	0.21672	0.218749	0.37086	0.0738724
GRB7_E71_R	N	GRB7	NM_001030002.1	0.00227572	0.00743725	0.262659	0.980633	0.990303	-0.00112505	0.102218	0.18172	0.101409	0.0657692	0.10288	-0.0644808	7.74499e-07	1.12229e-05	0.710765	0.0486136	0.110952	0.137563
GRB7_P160_R	N	GRB7	NM_001030002.1	1.0947e-09	1.44953e-08	0.336006	0.911773	0.957742	0.00985856	0.000362168	0.00172531	0.270132	0.990006	0.991943	-0.000842896	4.60423e-10	2.43865e-08	0.591658	3.535e-05	0.000233037	0.332872
GRPR_P200_R	N	GRPR	NM_005314.2	0.233102	0.328783	-0.0817249	2.74028e-06	0.000116918	-0.312552	6.3552e-05	0.000447779	-0.222249	2.3516e-06	8.25923e-05	-0.283573	0.000444181	0.00135766	-0.279435	0.553864	0.707857	0.0522708
GSTM1_P266_F	Y	GSTM1	NM_146421.1	0.143817	0.229739	0.132561	0.993998	0.995943	0.000689957	0.245039	0.361557	-0.0665582	0.379566	0.465294	0.0560949	2.1906e-05	0.000143793	0.426701	0.45471	0.625932	0.0617979
GSTM1_P363_F	Y	GSTM1	NM_146421.1	0.0246171	0.0551194	0.155213	0.0642638	0.251169	-0.200183	0.311271	0.430505	-0.028463	0.00374493	0.00933801	-0.329201	1.37529e-06	1.72739e-05	0.2593	0.860911	0.921505	0.0134454
GSTM2_E153_F	Y	GSTM2	NM_000848.2	0.767115	0.825528	0.00293483	0.181285	0.411306	0.0381982	0.071215	0.135547	-0.0481311	0.392367	0.477178	-0.0363327	0.00798666	0.0145522	-0.139861	1.83808e-05	0.000137722	-0.166287
GSTM2_P109_R	N	GSTM2	NM_000848.2	0.857383	0.90078	0.0017284	0.456027	0.656251	0.0124541	0.000726283	0.00303144	-0.105165	0.00798187	0.0172837	-0.118217	0.00119602	0.00291139	-0.144929	0.000492751	0.00226606	-0.126932
GSTM2_P453_R	N	GSTM2	NM_000848.2	0.30826	0.409237	0.0589771	0.105286	0.32831	-0.0981223	0.58715	0.675553	0.0250822	0.106224	0.156583	-0.0835211	0.452798	0.514802	-0.0911735	0.0068972	0.0223977	-0.218968
GSTP1_E322_R	Y	GSTP1	NM_000852.2	0.191563	0.28429	0.044026	0.86356	0.935026	-0.00153535	0.86241	0.896253	-0.0099023	0.0464357	0.076942	-0.0942187	0.140725	0.188615	0.133236	0.00217721	0.00838143	-0.0328126
GSTP1_P74_F	Y	GSTP1	NM_000852.2	0.875845	0.916415	0.000863484	0.897757	0.948591	0.000719298	0.406454	0.521163	-0.0316043	0.0201386	0.0370897	-0.0640303	0.0720298	0.104179	-0.0360921	0.00177301	0.00689452	-0.0478762
GSTP1_seq_38_S153_R	Y	GSTP1	NM_000852.2	0.912768	0.936295	-0.000448866	0.696657	0.839267	0.00154777	0.953997	0.965945	-0.00180686	0.105732	0.156043	-0.0321436	0.213976	0.272075	0.0848932	8.11499e-05	0.000468595	-0.0404759
GUCY2D_E419_R	Y	GUCY2D	NM_000180.1	0.106962	0.182752	0.0463979	0.598656	0.762467	0.00267863	0.0083206	0.0225008	-0.0130537	6.56589e-05	0.000533609	-0.0263835	0.858208	0.878805	0.00380018	0.940646	0.96066	-0.00137561
GUCY2D_P48_R	Y	GUCY2D	NM_000180.1	0.0785118	0.139415	0.132792	0.0950728	0.314329	-0.120238	0.701161	0.77413	0.0176155	0.000980978	0.00329712	-0.142892	0.0147461	0.025083	0.291263	0.467171	0.63898	-0.0462178
GUCY2F_P255_F	N	GUCY2F	NM_001522.1	0.0129355	0.0328955	-0.153406	0.0118258	0.0869111	-0.21852	0.0356568	0.0773571	-0.114408	0.000582276	0.00226999	-0.243265	0.670537	0.720241	-0.0429008	0.495164	0.659646	0.045926
GUCY2F_P995_F	N	GUCY2F	NM_001522.1	0.411377	0.506294	-0.0970304	0.693022	0.837516	-0.0466194	0.0408582	0.0863249	-0.159573	0.243369	0.317839	-0.121095	0.739206	0.78292	0.0360091	0.112444	0.219184	-0.174208
H19_E213_F	N	H19	NR_002196.1	0.167576	0.258186	-0.147432	0.011388	0.0849126	-0.238125	0.628535	0.712494	0.053348	0.638424	0.702953	0.0670672	0.44333	0.50591	0.103501	0.0254152	0.0667312	0.205205
H19_P1411_R	Y	H19	NR_002196.1	0.0309641	0.0663332	0.0330423	0.571124	0.739668	-0.015684	0.00664083	0.0185124	0.0580922	0.434866	0.518598	0.0252682	2.82946e-05	0.000178117	0.237586	0.0007284	0.00317847	0.144138
H19_P541_F	Y	H19	NR_002196.1	0.283654	0.384947	0.051558	0.00862206	0.0735749	0.211155	0.80142	0.849823	0.0205043	0.54119	0.615299	-0.0471553	0.613602	0.666543	-0.0336039	0.507803	0.670667	-0.043715
HBEGF_E214_F	Y	HBEGF	NM_001945.1	0.000270621	0.00114511	0.227078	0.770898	0.883271	0.00808946	0.793371	0.84307	0.0144429	0.385064	0.470907	-0.0303973	0.00999518	0.0178726	-0.118359	0.000429011	0.00200903	-0.117948
HBEGF_P32_R	Y	HBEGF	NM_001945.1	0.224096	0.319603	0.0147209	0.465193	0.663451	0.0163897	0.404471	0.520325	0.0421754	0.0162761	0.0312892	-0.018556	0.000221752	0.000805226	-0.0435548	6.01427e-06	5.84679e-05	-0.0409007
HBII-13_E48_F	N	HBII-13	NR_001294.1	0.0797041	0.140719	-0.100961	0.0173453	0.115146	-0.186884	0.555702	0.650757	-0.0198625	0.0119927	0.023923	-0.137133	0.000721663	0.00192443	0.145613	0.0113774	0.0340141	0.147547
HBII-13_P991_R	N	HBII-13	NR_001294.1	0.0937721	0.163119	-0.0644463	0.200876	0.43396	-0.0503262	0.0833979	0.154151	-0.021622	0.209463	0.278558	0.011256	0.0120117	0.0209898	0.0709571	0.207119	0.355459	0.0621321
HBII-52_E142_F	N	HBII-52	NR_001291.1	2.1959e-07	1.76592e-06	-0.411655	0.365698	0.582803	-0.0775131	0.739444	0.803336	-0.0221363	0.295107	0.37617	-0.0777178	0.811873	0.843163	-0.0212416	0.0213639	0.0576714	0.210425
HBII-52_P563_F	Y	HBII-52	NR_001291.1	0.000493925	0.00195827	-0.231281	0.25252	0.484015	-0.064466	0.0617954	0.121846	-0.0396198	0.0766749	0.117655	-0.0752438	0.6752	0.724743	0.0177323	0.336238	0.513716	0.0395244
HBII-52_P659_F	Y	HBII-52	NR_001291.1	0.0269801	0.0595423	-0.106417	0.310175	0.532323	-0.0351458	0.0565012	0.112856	0.0229563	0.0845965	0.128399	0.0279298	2.17035e-06	2.39937e-05	0.0638394	0.000536216	0.002444	0.0522401
HCK_P46_R	Y	HCK	NM_002110.2	0.475757	0.564296	0.0190764	0.21148	0.442614	-0.00601318	7.09201e-05	0.000482006	-0.0282289	0.000570789	0.00224803	-0.0362119	0.00183648	0.00411199	0.276858	0.108759	0.213079	0.100447
HCK_P858_F	Y	HCK	NM_002110.2	0.0848247	0.148058	0.151406	0.263344	0.493799	0.09317	0.686921	0.761813	0.0305074	0.0877107	0.132082	-0.159836	2.51473e-08	6.77654e-07	0.568823	0.235779	0.394076	0.105522
HDAC11_P556_F	Y	HDAC11	NM_024827.1	0.0698073	0.127367	0.0908361	0.898742	0.948775	0.00039448	0.0566597	0.113025	0.107415	0.000267294	0.00129722	-0.0193989	0.000253569	0.00088118	-0.0516911	8.98458e-07	1.5506e-05	-0.0519901
HDAC1_P414_R	Y	HDAC1	NM_004964.2	0.937181	0.954582	0.00766641	3.49088e-06	0.000144919	-0.410245	6.73669e-08	2.26397e-06	0.424574	1.37693e-07	1.62689e-05	0.469544	3.2475e-07	5.66836e-06	0.411532	0.455594	0.625932	0.0582075
HDAC5_E298_F	Y	HDAC5	NM_005474.4	0.0015361	0.00532606	0.128357	0.0432169	0.206153	-0.0573273	0.510518	0.611666	0.025827	0.000138679	0.000851532	-0.140081	0.205237	0.262266	0.0956681	0.000553516	0.00250797	-0.129435
HDAC6_E102_F	Y	HDAC6	NM_006044.2	0.108445	0.184428	-0.155667	0.337045	0.557868	-0.102013	0.447115	0.559714	-0.0691878	0.549862	0.622853	-0.0719229	0.600908	0.656001	-0.0282807	0.0371534	0.0905836	0.18787
HDAC6_P153_F	Y	HDAC6	NM_006044.2	0.429891	0.524474	-0.0625193	0.113843	0.34287	-0.109622	0.129564	0.220388	-0.0959944	0.912986	0.938652	-0.00950506	0.0589159	0.0870143	-0.0372642	0.000912147	0.00388104	0.213917
HDAC7A_P344_F	N	HDAC7A	NM_015401.1	0.369529	0.467157	-0.0444348	0.599883	0.762975	-0.0190403	0.0670782	0.129773	-0.0495285	0.0251313	0.0450954	-0.16222	0.00493271	0.00956646	0.226092	1.11839e-05	9.33616e-05	0.406524
HDAC9_E38_F	N	HDAC9	NM_014707.1	0.0195639	0.045669	0.224188	0.00651438	0.0592077	-0.0637273	0.056964	0.113338	-0.0368812	0.000424456	0.00182389	-0.0740218	0.0107364	0.0190428	-0.0449495	0.00653064	0.0214339	-0.0459578
HDAC9_P137_R	N	HDAC9	NM_014707.1	0.0762159	0.136125	0.143066	0.0489068	0.21932	-0.0455975	1.07317e-06	1.85212e-05	-0.0857594	0.000139834	0.000851532	-0.0942127	0.00334733	0.00683711	-0.0407082	0.000332437	0.00158579	-0.0434921
HFE_E273_R	Y	HFE	NM_139010.1	0.117115	0.195958	0.106527	0.0924109	0.311117	0.00806445	2.56122e-08	1.19213e-06	0.453613	0.127774	0.182909	0.104656	3.86032e-09	1.31765e-07	0.717986	0.406421	0.586714	0.0666491
HGF_E102_R	N	HGF	NM_001010933.1	1.26113e-06	9.13722e-06	0.50927	0.173545	0.403274	-0.0462405	0.680872	0.756197	0.0163943	0.0673703	0.10495	-0.0896075	0.219209	0.278268	0.112807	0.737687	0.852586	0.0118645
HGF_P1293_R	N	HGF	NM_001010933.1	0.0625945	0.116823	-0.0516452	0.406556	0.618901	-0.0163355	0.566463	0.660157	0.00499833	0.648677	0.7122	0.00506555	0.14209	0.190114	0.0349007	0.990476	0.993028	0.000472147
HHIP_E94_F	Y	LOC646576	XM_933718.1	0.476553	0.564368	0.0320888	0.16171	0.39122	-0.0145598	0.000191611	0.00103632	-0.0332316	0.000823147	0.00287353	-0.0390268	8.02248e-05	0.000380325	-0.0738964	1.70909e-06	2.38651e-05	-0.0692152
HHIP_P307_R	Y	HHIP	NM_022475.1	0.000249909	0.00106333	0.312108	0.0479606	0.218295	-0.0205197	0.862037	0.896253	0.00559623	0.000111364	0.000746965	-0.048996	0.462443	0.524215	0.0594202	0.0113529	0.0340141	-0.0403134
HHIP_P578_R	Y	HHIP	NM_022475.1	2.05134e-12	4.14587e-11	0.481558	0.91632	0.959821	0.00429141	0.766162	0.825842	-0.0123393	0.000127675	0.000813732	-0.0762072	0.000104434	0.000454421	0.411876	0.0161408	0.0455741	0.124302
HIC-1_seq_48_S103_R	Y	.	.	0.000313695	0.00131649	-0.226857	0.000148018	0.003295	-0.299255	0.0117901	0.030539	0.08666	0.000316023	0.00145492	-0.305113	7.6509e-05	0.000370797	0.371745	0.00192366	0.00744269	0.231967
HIC1_E151_F	Y	HIC1	NM_006497.2	0.382524	0.480165	-0.00417197	0.444745	0.645069	0.0120105	6.13532e-09	5.57935e-07	-0.042954	3.58482e-06	9.66014e-05	-0.0496707	1.57796e-05	0.000117089	-0.0518175	0.926892	0.95808	-0.00315489
HIC1_P565_R	Y	HIC1	NM_006497.2	0.040997	0.0831855	0.204671	0.000229399	0.00463627	-0.0249521	0.0523777	0.1067	-0.0129134	0.00285328	0.00741563	-0.0234686	0.371697	0.439265	-0.0210436	1.03634e-07	2.79266e-06	-0.044478
HIC2_P498_F	Y	HIC2	NM_015094.1	0.00639966	0.017754	0.122247	0.187405	0.419002	0.0160047	0.0130436	0.0331706	-0.0159137	0.006566	0.0146377	-0.0228108	0.00327928	0.00671596	0.4178	0.915336	0.951736	-0.00313832
HIC2_P528_R	Y	HIC2	NM_015094.1	0.00650293	0.0179327	0.0885422	0.562485	0.732184	0.00547042	0.000613619	0.00263274	-0.019583	0.0066752	0.0148381	-0.023015	0.000239087	0.000842287	0.326689	0.828344	0.905629	-0.00603616
HIF1A_P488_F	Y	HIF1A	NM_001530.2	0.699267	0.770498	0.0081427	0.739794	0.866109	0.0130161	0.00896859	0.0239163	-0.0593463	0.00171728	0.00504347	-0.0964602	0.574832	0.630673	-0.013649	0.000549722	0.00249814	-0.0577785
HLA-DOA_P191_R	N	HLA-DOA	NM_002119.3	0.133591	0.217871	0.0842832	0.127806	0.363901	-0.0533992	0.873923	0.905156	-0.0081989	0.0353839	0.0605905	-0.0981296	0.26314	0.327274	-0.0537271	0.0051267	0.0174217	-0.0890672
HLA-DOA_P594_F	N	HLA-DOA	NM_002119.3	0.0824646	0.144431	-0.109196	0.316407	0.537017	-0.0697867	0.174465	0.280631	-0.0487757	0.0348466	0.0598038	-0.127752	9.66906e-06	8.02793e-05	0.245924	4.24159e-06	4.52437e-05	0.246046
HLA-DOB_E432_R	N	HLA-DOB	NM_002120.2	0.000148534	0.000665156	-0.220524	0.00533408	0.0518553	-0.197142	0.727209	0.793176	-0.011272	0.00275406	0.00718207	-0.152256	0.0260769	0.0415765	0.111004	4.09342e-10	4.83653e-08	0.245046
HLA-DOB_P1114_R	N	HLA-DOB	NM_002120.2	0.00314389	0.00987528	-0.185064	0.161265	0.39122	-0.051107	0.664963	0.743365	-0.00682733	0.0797365	0.121503	-0.0493016	0.119747	0.163204	0.037228	0.991089	0.993028	0.000453689
HLA-DOB_P357_R	N	HLA-DOB	NM_002120.2	0.0572292	0.10839	-0.0135565	0.219853	0.444919	-0.0194466	0.0407816	0.0862817	0.0113015	0.034015	0.0585073	0.0184784	6.0028e-05	0.000305854	0.103925	4.28119e-05	0.000269505	0.092191
HLA-DPA1_E35_R	N	HLA-DPA1	NM_033554.2	0.00222562	0.00728901	-0.114776	0.000444151	0.00812163	-0.236644	0.0181221	0.0436293	0.0488622	0.0480244	0.0789781	-0.117632	1.79457e-05	0.000127614	0.108897	0.0176713	0.0489948	0.0630551
HLA-DPA1_P205_R	N	HLA-DPA1	NM_033554.2	0.0225995	0.0512744	-0.170066	1.0991e-12	3.37643e-10	-0.469655	0.30053	0.421951	-0.0598022	0.00471106	0.0113956	-0.208114	0.430858	0.494618	0.0442099	0.0249991	0.0658638	-0.173729
HLA-DPA1_P28_R	N	HLA-DPA1	NM_033554.2	0.000193027	0.0008447	-0.255018	3.81462e-10	6.51028e-08	-0.386087	0.721207	0.789012	0.0231402	0.00232809	0.00632912	-0.164988	0.725404	0.77162	0.0189906	0.0272049	0.0705857	-0.218285
HLA-DPB1_E2_R	N	HLA-DPB1	NM_002121.4	0.167886	0.258186	0.0746958	1.23006e-06	6.09473e-05	-0.33464	0.066014	0.128351	0.136559	0.0587203	0.0934657	0.175847	0.377246	0.444705	0.0561594	0.0409607	0.0976952	-0.174299
HLA-DPB1_P540_F	N	HLA-DPB1	NM_002121.4	0.0164931	0.0401479	-0.0341962	0.292478	0.510507	-0.0228392	0.599179	0.687333	-0.00697667	0.53031	0.606069	0.00490334	0.568428	0.624986	0.0136526	2.49155e-07	5.46716e-06	0.073329
HLA-DQA2_E93_F	N	HLA-DQA2	NM_020056.2	0.0510712	0.0990364	-0.170264	0.387733	0.604627	-0.0657802	0.033944	0.0740597	-0.115375	0.0124272	0.0246936	-0.19558	0.592836	0.649034	-0.0539287	0.0128739	0.0376652	0.155881
HLA-DQA2_P282_R	N	HLA-DQA2	NM_020056.2	0.00997127	0.025878	-0.182719	0.149286	0.38647	-0.114707	0.027275	0.0612491	0.0552385	0.269835	0.34674	-0.0576876	0.00337601	0.00688653	0.152746	0.915752	0.951736	0.00906214
HLA-DRA_P132_R	N	HLA-DRA	NM_019111.3	0.0691849	0.126612	0.169872	0.00091006	0.0142638	-0.157295	0.00344559	0.0108898	0.236671	0.986811	0.990034	0.00116612	0.918858	0.92853	-0.00504983	0.0540828	0.121165	-0.0557835
HLA-DRA_P77_R	N	HLA-DRA	NM_019111.3	0.486993	0.574959	0.0422345	0.0580193	0.238282	-0.11372	0.00601391	0.017138	0.210883	0.172374	0.236188	0.100841	0.0686448	0.0996582	-0.145754	0.0606262	0.132088	-0.111238
HLA-DRB1_P556_R	N	HLA-DRB1	NM_002124.1	0.0603894	0.11312	-0.110259	0.425533	0.632739	-0.0478197	0.119598	0.205944	-0.0906035	0.0672572	0.10488	-0.142531	8.37044e-05	0.000388429	-0.385666	0.818634	0.902895	-0.0153713
HLA-F_E402_F	Y	HLA-F	NM_018950.1	0.399756	0.495181	0.034091	0.106555	0.32999	0.00907874	0.000801743	0.00325788	-0.00773927	2.14869e-05	0.000279781	-0.0134179	0.0830751	0.117674	0.170817	0.631067	0.771232	0.0261969
HLF_E192_F	Y	HLF	NM_002126.3	0.0552326	0.10565	0.141634	0.152841	0.387543	-0.00517889	1.50612e-06	2.36062e-05	-0.031261	7.38993e-05	0.000570398	-0.0371636	0.00170836	0.00388173	-0.0567724	6.47097e-09	3.97576e-07	-0.0786964
HOXA11_E35_F	Y	HOXA11	NM_005523.4	3.22012e-05	0.000164322	0.435621	0.545855	0.720923	0.0287038	0.0251202	0.0574176	0.176004	0.73115	0.784798	-0.0115445	0.143729	0.191307	0.185944	0.0566971	0.126213	0.157932
HOXA11_P698_F	Y	HOXA11	NM_005523.4	0.000524944	0.00205692	0.373779	0.611933	0.771698	0.0406151	0.177549	0.283426	0.112485	0.925203	0.946146	-0.00740133	0.0641475	0.0940935	0.267755	0.00367206	0.0131783	0.296187
HOXA11_P92_R	Y	HOXA11	NM_005523.4	0.196183	0.289469	0.0641405	0.795781	0.899425	0.0100327	0.207122	0.318458	-0.0476932	0.630268	0.695468	-0.0227126	0.310415	0.378171	0.120744	0.481475	0.651213	0.0338419
HOXA5_E187_F	Y	HOXA5	NM_019102.2	0.294595	0.395194	-0.0758648	0.240917	0.470578	-0.0812393	0.0122563	0.0314811	0.208023	0.761678	0.814152	-0.0273018	0.360314	0.428361	0.095304	0.0218403	0.0584438	0.227518
HOXA5_P1324_F	Y	HOXA5	NM_019102.2	0.000579295	0.00223007	0.297859	0.586815	0.752377	0.0582832	0.728111	0.793176	-0.0252651	0.0164986	0.0315589	-0.131014	0.143539	0.191294	0.125735	0.0459994	0.106235	0.0800789
HOXA5_P479_F	Y	HOXA5	NM_019102.2	0.815746	0.868922	-0.0165087	0.00103995	0.0157606	-0.255356	0.226684	0.340445	-0.060342	0.000103622	0.000710549	-0.227836	0.759855	0.799957	0.0282172	0.822014	0.902895	0.017522
HOXA9_E252_R	Y	HOXA9	NM_002142.3	2.40443e-16	7.38641e-15	0.66386	0.145869	0.38334	0.138328	0.156841	0.256558	0.0642599	0.191596	0.258604	-0.0307026	0.0540943	0.0805905	0.213135	0.0657569	0.141161	0.152528
HOXA9_P1141_R	Y	HOXA9	NM_002142.3	2.34192e-05	0.000125608	0.380457	0.349881	0.568456	0.0898675	1.66493e-05	0.00015884	-0.360293	1.35673e-07	1.62689e-05	-0.458878	0.000415585	0.00129909	0.337873	0.176568	0.312812	0.0922722
HOXA9_P303_F	Y	HOXA9	NM_002142.3	1.51654e-07	1.30134e-06	0.343932	0.146498	0.383729	0.133803	0.381468	0.494878	0.0253482	0.678215	0.739346	0.0153769	0.00555412	0.0105453	0.31448	0.218272	0.370768	0.0958117
HOXB13_E21_F	Y	HOXB13	NM_006361.4	0.07266	0.131147	0.0968733	0.847782	0.927488	-0.00100773	0.0520051	0.106264	-0.0282054	0.00531015	0.0125483	-0.0389247	0.000296063	0.000991426	-0.0360176	0.0376049	0.0915391	-0.0217722
HOXB13_P17_R	Y	HOXB13	NM_006361.4	0.110081	0.186217	0.100278	0.752519	0.87372	-0.00234257	0.00324171	0.0103951	-0.0214343	0.00942086	0.0197925	-0.0265911	0.0143729	0.0245026	-0.0274539	0.218454	0.370768	-0.015093
HOXB2_P488_R	N	HOXB2	NM_002145.2	0.00142902	0.00503434	0.118036	0.0249216	0.14555	-0.20806	1.66386e-06	2.5815e-05	-0.289592	4.96393e-10	7.62459e-07	-0.402788	0.000277471	0.000949211	0.412989	1.51304e-05	0.000116785	0.407017
HOXB2_P99_F	Y	HOXB2	NM_002145.2	0.00138513	0.00489096	0.24533	0.0292793	0.164736	-0.135276	1.04931e-07	3.16029e-06	-0.245417	1.50881e-07	1.65538e-05	-0.311745	0.602247	0.656996	-0.0518368	0.0187848	0.0517087	0.204275
HOXC6_P456_R	Y	HOXC4	NM_014620.2	0.000992289	0.00362032	0.267472	0.558533	0.729015	0.0325969	0.0171732	0.0418035	-0.0696112	0.432315	0.51676	-0.0395605	0.475764	0.537333	-0.0277796	0.114529	0.221836	-0.0620422
HOXC6_P585_R	Y	HOXC4	NM_014620.2	0.0351571	0.0740758	0.119435	0.198289	0.431404	0.102523	0.00549569	0.0158971	-0.0992128	0.60433	0.675092	-0.0313887	0.0530882	0.0792454	0.0970904	0.111008	0.217207	0.0573952
HPN_P374_R	N	HPN	NM_182983.1	2.0552e-08	2.06326e-07	0.389996	0.982743	0.991132	-0.00187492	3.40646e-05	0.000269707	0.183325	0.156336	0.217117	-0.0860227	1.17926e-07	2.29283e-06	0.410684	0.30821	0.484065	0.0960514
HPN_P823_F	N	HPN	NM_182983.1	0.0465617	0.0914562	0.101854	0.819175	0.913201	0.0204479	0.00508679	0.014968	0.0584083	0.000503119	0.00207183	-0.22935	1.09879e-06	1.45495e-05	0.226594	0.445126	0.618746	0.0405169
HPSE_P29_F	Y	HPSE	NM_006665.2	0.022883	0.0517648	0.168262	0.289494	0.509908	-0.00843395	0.000307977	0.00150654	-0.0153714	0.00909912	0.019196	-0.0149136	0.00103963	0.00260077	-0.0379084	0.0523045	0.117456	-0.0224348
HPSE_P93_F	Y	HPSE	NM_006665.2	0.0515324	0.0996899	0.0905083	0.153574	0.388615	-0.00600833	0.050562	0.103828	-0.00570418	0.0334163	0.0576065	-0.00829133	6.33746e-05	0.000315632	-0.0434194	2.53279e-05	0.000177642	-0.0364235
HRASLS_E72_R	Y	HRASLS	NM_020386.2	0.159728	0.249829	0.0127254	0.131379	0.367893	-0.00452054	0.643858	0.726646	-0.00471485	0.0211734	0.0388095	-0.0204488	1.95987e-05	0.000133202	-0.0366211	0.230806	0.387456	-0.0200167
HRASLS_P353_R	Y	HRASLS	NM_020386.2	5.82261e-06	3.52107e-05	0.283557	0.000544443	0.00929182	-0.245556	3.84792e-10	9.85067e-08	0.393562	0.975322	0.981362	-0.00212995	0.238433	0.299209	0.14921	0.0168901	0.047515	0.179483
HS3ST2_E145_R	Y	HS3ST2	NM_006043.1	0.138042	0.223256	-0.0182007	0.614825	0.77471	0.0154652	0.775177	0.830764	0.0183881	0.0066565	0.014818	-0.0755824	0.0443121	0.0671899	0.153341	0.143448	0.266005	0.0710319
HS3ST2_P171_F	Y	HS3ST2	NM_006043.1	0.509956	0.595965	-0.00496663	0.560885	0.730721	-0.00618026	0.00212671	0.00732428	-0.0295475	0.000689643	0.00253031	-0.0454787	0.00106287	0.00265026	-0.034323	0.00108368	0.00445062	-0.0300258
HS3ST2_P546_F	Y	HS3ST2	NM_006043.1	0.843508	0.891079	-0.00402666	0.961911	0.974772	0.00138456	0.0747768	0.141102	-0.0395463	0.000610169	0.00235081	-0.0618912	0.000721026	0.00192443	-0.0610635	0.832467	0.906858	-0.00878037
HSD17B12_E145_R	Y	HSD17B12	NM_016142.1	0.33552	0.433644	0.0458445	0.285583	0.507181	0.00293844	0.710357	0.781596	0.00665879	0.000135578	0.000842051	-0.0140758	0.000654671	0.00179247	-0.0427131	0.000933634	0.00394904	-0.0332069
HSD17B12_P97_F	Y	HSD17B12	NM_016142.1	0.412782	0.506416	0.0347896	0.439798	0.64092	-0.00402964	0.314927	0.432673	-0.0146876	2.69737e-06	8.28283e-05	-0.0382937	0.000314977	0.00104493	-0.0673644	0.0914011	0.184242	-0.0380696
HSPA2_P162_R	N	HSPA2	NM_021979.2	0.538311	0.621222	-0.00696967	0.00963197	0.0766565	-0.116309	0.107634	0.189377	0.0123595	0.0623652	0.0987556	0.0225136	0.807372	0.839623	0.0120426	0.907039	0.948408	0.00766504
HTR1B_E232_R	Y	HTR1B	NM_000863.1	0.180114	0.273375	0.0932125	0.468886	0.666656	0.0385479	0.240963	0.356987	0.0605998	0.916432	0.941565	-0.00572396	9.47195e-05	0.000429171	0.53413	0.128841	0.244019	0.110017
HTR1B_P107_F	Y	HTR1B	NM_000863.1	0.286935	0.386946	0.0525212	0.977354	0.987642	-0.00100451	0.00254775	0.00848882	-0.0716356	2.85801e-06	8.28283e-05	-0.119696	0.636549	0.688064	0.0151122	0.163012	0.294227	0.100174
HTR1B_P222_F	Y	HTR1B	NM_000863.1	0.159696	0.249829	0.062076	0.760326	0.878091	-0.00473907	0.727788	0.793176	-0.00800315	0.00650407	0.0145207	-0.0452257	0.326961	0.395443	0.0850901	0.0753573	0.157696	0.16074
HTR2A_E10_R	N	HTR2A	NM_000621.2	0.107489	0.183244	0.115751	0.00915727	0.0756609	-0.20629	0.343694	0.460658	-0.0162873	0.540235	0.614668	-0.0396369	0.00239533	0.00517473	0.241095	0.743205	0.856386	0.0313283
HTR2A_P853_F	N	HTR2A	NM_000621.2	0.000758438	0.00284137	0.435719	0.109988	0.337032	-0.0499872	0.000139783	0.000807167	-0.149094	8.21312e-07	4.85206e-05	-0.202137	0.0139733	0.023981	-0.0533127	0.716003	0.835699	0.0136047
IAPP_E280_F	N	IAPP	NM_000415.1	0.00059956	0.00230231	-0.19886	0.0366126	0.18999	-0.156792	0.360561	0.474568	-0.0400412	0.265597	0.342246	-0.0579298	0.115834	0.158012	-0.0685671	0.662549	0.798089	-0.0246136
IAPP_P1154_F	N	IAPP	NM_000415.1	0.00994969	0.025878	-0.150926	0.10307	0.325613	-0.110267	0.983918	0.988423	0.000196007	0.0842804	0.128173	-0.120009	0.0105434	0.0187655	0.0738417	0.370529	0.551484	0.0453767
IAPP_P115_F	N	IAPP	NM_000415.1	0.186181	0.278998	-0.0502724	0.14436	0.382999	-0.0993165	0.00459065	0.0138531	-0.17438	9.37649e-06	0.000159384	-0.301921	0.000616167	0.00170222	0.0485424	0.970394	0.978035	-0.00168548
ICA1_P61_F	Y	ICA1	NM_004968.1	0.0139094	0.0345709	0.160089	0.0122723	0.0889163	-0.0242431	0.11256	0.196469	0.0979546	4.21309e-07	3.23565e-05	-0.0637252	0.0340276	0.0530228	0.144014	0.390417	0.571668	0.0250156
ICA1_P72_R	Y	ICA1	NM_004968.1	0.00017458	0.000775012	0.337867	1.43567e-08	1.29717e-06	-0.168677	0.0162022	0.0398185	0.205747	0.00248163	0.00662299	-0.056921	2.04242e-05	0.000136994	0.509645	0.0133871	0.0387972	0.229393
ICAM1_E242_F	Y	ICAM1	NM_000201.1	0.000326679	0.00135616	0.278519	0.890168	0.942315	0.00536599	0.522699	0.622377	-0.0207595	0.224112	0.294975	-0.0289482	0.00334058	0.0068324	0.281725	0.858154	0.921006	-0.00728856
ICAM1_P119_R	Y	ICAM1	NM_000201.1	0.0048715	0.0141985	0.209149	0.152898	0.387543	-0.00826102	0.00242336	0.00821696	-0.0189687	3.73327e-05	0.000401	-0.0252288	0.00151719	0.00350966	-0.0361521	1.60742e-05	0.000122835	-0.0366959
ICAM1_P386_R	Y	ICAM1	NM_000201.1	1.94675e-15	5.33964e-14	0.50138	0.205138	0.439354	-0.1116	0.308272	0.428053	-0.0687816	5.77417e-06	0.000113084	-0.20537	0.0784566	0.111975	-0.144878	0.0151632	0.0430639	-0.187994
ID1_P659_R	Y	ID1	NM_002165.2	0.0262085	0.0579226	0.164552	0.962079	0.974772	-0.000858953	0.411881	0.527207	0.0447008	0.000292827	0.00137548	-0.0439262	0.0026669	0.00559613	-0.0481789	2.20083e-07	4.89924e-06	-0.0603506
ID1_P880_F	Y	ID1	NM_002165.2	0.905297	0.931994	-0.00535589	0.727988	0.858825	-0.0080106	0.930042	0.947939	-0.0047154	0.000280394	0.00133339	-0.0754162	0.000221728	0.000805226	-0.10843	0.011394	0.0340141	-0.0704763
IFNGR1_P307_F	Y	IFNGR1	NM_000416.1	0.2912	0.391666	0.0283381	0.85797	0.933503	-0.00224604	2.38175e-05	0.000205526	-0.0379473	7.5871e-05	0.00057692	-0.0484979	0.128853	0.174377	-0.0376152	0.0115045	0.0342459	-0.0540389
IFNGR2_E164_F	Y	IFNGR2	NM_005534.2	0.0259559	0.0574472	0.100667	0.212302	0.443033	-0.0118008	0.611959	0.697825	0.0132312	0.00054495	0.00218143	-0.0397415	0.00628719	0.0117914	-0.0738061	1.94143e-05	0.00014406	-0.0832732
IFNGR2_P377_R	Y	IFNGR2	NM_005534.2	3.38863e-12	6.673e-11	0.325461	0.000707235	0.0115565	-0.227062	1.37428e-05	0.000135314	0.127149	0.14856	0.208011	0.0718204	0.000522134	0.00152829	0.137981	0.782886	0.878388	-0.0199554
IFNG_E293_F	N	IFNG	NM_000619.2	8.6813e-05	0.000409033	-0.32869	0.0583838	0.23914	-0.141623	0.00300528	0.00971811	-0.184614	0.0481545	0.0791073	-0.146394	0.00226131	0.00493377	-0.275104	0.425734	0.602142	-0.0590283
IFNG_P188_F	N	IFNG	NM_000619.2	0.000102178	0.000475592	-0.299148	0.0102495	0.0793746	-0.158323	0.00248753	0.00832429	-0.204294	0.000713069	0.00257106	-0.283608	0.0058741	0.0110707	-0.327361	0.0311479	0.0785602	-0.157981
IFNG_P459_R	N	IFNG	NM_000619.2	0.00991879	0.0258663	-0.147896	0.147896	0.38549	-0.0707389	0.210409	0.32146	-0.0486445	0.21648	0.28591	-0.0704713	0.625677	0.6787	-0.0302946	0.855568	0.918988	-0.0107404
IGF1R_E186_R	Y	IGF1R	NM_000875.2	0.497891	0.585575	-0.00250276	0.884759	0.941897	0.000613367	0.00335697	0.0106682	-0.00995708	0.00305286	0.00782836	-0.0140469	0.000638514	0.00175449	-0.0257845	3.84986e-05	0.000249043	-0.0228745
IGF1R_P325_R	Y	IGF1R	NM_000875.2	0.720601	0.788241	0.00220265	0.956304	0.973943	0.000284683	2.25336e-06	3.26211e-05	-0.023112	5.39681e-05	0.000478283	-0.0272108	5.5705e-05	0.000293024	-0.0534101	0.140601	0.262091	-0.0335389
IGF1_E394_F	N	IGF1	NM_000618.2	0.00053008	0.00207176	-0.251922	5.87161e-05	0.00158451	-0.240206	0.00426555	0.0129998	-0.153406	0.0243657	0.0437728	-0.174398	0.497001	0.557629	-0.0549703	0.90921	0.948698	-0.00899714
IGF1_P933_F	N	IGF1	NM_000618.2	0.0294957	0.0641721	0.142781	0.0919076	0.311117	-0.114782	4.81559e-07	1.01325e-05	-0.178814	1.33966e-06	6.23549e-05	-0.217385	0.00259342	0.0055081	-0.0573123	0.373369	0.553033	0.0613256
IGF2AS_E4_F	Y	IGF2AS	NM_016412.1	0.0258105	0.0572904	0.106257	0.470675	0.668167	-0.0144101	0.0841116	0.154941	-0.0409623	0.0101463	0.0208352	-0.0697884	0.00180777	0.00405956	-0.108748	2.01134e-06	2.64053e-05	-0.12311
IGF2AS_P203_F	Y	IGF2AS	NM_016412.1	0.0385676	0.07941	0.189978	1.03396e-06	5.29385e-05	-0.158014	0.298688	0.420133	-0.0589969	0.000196694	0.00105269	-0.177796	0.0805784	0.1146	-0.086043	0.395061	0.575709	0.0716599
IGF2R_P396_R	Y	IGF2R	NM_000876.1	0.585432	0.664615	-0.00170655	0.861122	0.933674	-0.000597582	0.017318	0.0420228	-0.0101535	0.257205	0.33339	-0.00879409	0.891495	0.906245	0.00904092	5.93224e-05	0.000358737	-0.0967784
IGF2_E134_R	Y	IGF2	NM_000612.2	0.244522	0.341132	0.0818058	0.205836	0.439354	-0.026745	0.487322	0.595487	0.0318898	0.00186486	0.00534408	-0.0408933	0.0234976	0.0381123	-0.0690975	0.823624	0.903036	0.0126247
IGF2_P1036_R	Y	IGF2AS	NM_016412.1	0.138803	0.223951	0.0464168	0.746201	0.870719	-0.00177951	0.0135605	0.0341457	-0.0118321	6.74746e-05	0.000545479	-0.023269	8.84638e-05	0.00040709	-0.0684365	6.65212e-06	6.3072e-05	-0.0556575
IGF2_P36_R	Y	IGF2	NM_000612.2	0.557454	0.638992	0.00651119	0.73487	0.863436	0.010575	0.00263782	0.00867599	-0.0402704	6.36995e-05	0.000526034	-0.0674844	0.087483	0.122716	-0.0459587	0.75559	0.862754	0.0158588
IGFBP1_E48_R	Y	IGFBP1	NM_001013029.1	0.00894959	0.0235386	0.237865	0.478342	0.674058	-0.0541997	0.393609	0.508909	-0.0412	1.76718e-05	0.000251325	-0.37533	0.00530627	0.0101753	0.341077	0.000657486	0.00290278	0.30772
IGFBP1_P12_R	Y	IGFBP1	NM_001013029.1	0.038867	0.0799192	0.215189	0.213338	0.443615	-0.0745763	0.480953	0.590326	0.0523083	0.369605	0.456729	-0.101672	0.00264766	0.00556335	0.269145	0.000938411	0.00394904	0.280403
IGFBP2_P306_F	Y	IGFBP2	NM_000597.2	2.81998e-11	4.60796e-10	0.58485	0.26568	0.494049	-0.00879133	0.00384429	0.0119049	0.168913	0.0457158	0.0760774	-0.019945	0.358972	0.427661	0.0758372	0.662725	0.798089	0.0146236
IGFBP2_P353_R	Y	IGFBP2	NM_000597.2	1.07959e-06	7.9342e-06	0.41704	0.668645	0.816762	-0.0119381	0.230368	0.345215	0.0656044	0.0287399	0.0506825	-0.0807122	0.202662	0.259624	0.0894561	0.70983	0.831654	-0.0147547
IGFBP3_E65_R	Y	IGFBP3	NM_000598.4	0.340133	0.437558	0.025729	0.396463	0.612416	-0.00424931	0.383487	0.497077	0.0333398	3.26491e-05	0.000368743	-0.0392304	0.000399763	0.00126867	-0.0857781	0.302597	0.478177	-0.0386065
IGFBP3_P1035_F	Y	IGFBP3	NM_000598.4	2.93755e-06	1.87223e-05	0.42631	0.752389	0.87372	-0.00457275	7.0618e-05	0.000482006	0.247265	0.778675	0.82886	-0.00935797	0.0038314	0.00763298	-0.0311241	0.157638	0.285869	0.0797083
IGFBP3_P423_R	Y	IGFBP3	NM_000598.4	1.28215e-06	9.24594e-06	0.498909	0.917168	0.959821	0.00468249	0.0164708	0.0402852	0.164976	0.882498	0.917129	-0.00583451	0.0237471	0.0384358	-0.0385815	0.595558	0.737724	0.0282579
IGFBP5_E144_F	Y	IGFBP5	NM_000599.2	0.000300435	0.0012643	0.103363	0.17156	0.402479	0.0321511	0.558172	0.652475	0.0206839	0.210321	0.279216	-0.0339916	0.00125567	0.00303256	-0.0703615	0.00312193	0.0114173	-0.0512845
IGFBP5_P9_R	Y	IGFBP5	NM_000599.2	0.00333609	0.010352	0.243803	0.869091	0.938386	0.00641317	0.000449802	0.00204407	0.334582	0.44903	0.531364	0.052962	0.00299568	0.00620967	-0.0642916	0.0049083	0.0169419	-0.0495842
IGFBP6_E47_F	N	SOAT2	NM_003578.2	1.27011e-07	1.11479e-06	0.48755	0.242886	0.472243	-0.0551068	0.0283295	0.0629728	0.141719	0.0012854	0.00407088	-0.161404	0.00348925	0.00707056	-0.113929	0.138828	0.2591	-0.0519262
IGFBP6_P328_R	Y	IGFBP6	NM_002178.2	0.000180842	0.000795912	0.299202	0.760281	0.878091	0.0049282	0.00415802	0.0127225	0.207546	0.420708	0.504456	-0.0195904	0.00405336	0.00802315	-0.0338847	0.00853994	0.0267156	-0.0263846
IGFBP7_P297_F	Y	IGFBP7	NM_001553.1	1.68475e-19	7.84176e-18	0.723624	0.00303659	0.0348075	-0.0639515	0.124729	0.213158	0.142824	0.00151857	0.00455571	-0.193925	0.573334	0.629479	0.0387703	0.623641	0.764496	0.0278222
IGFBP7_P371_F	Y	IGFBP7	NM_001553.1	5.53116e-15	1.41598e-13	0.729477	0.0133638	0.093816	-0.0521444	0.312151	0.43055	0.0756017	0.0510881	0.0826884	-0.0400867	1.64474e-05	0.000118736	-0.0523654	0.845168	0.91421	-0.00894364
IGSF4C_E65_F	Y	IGSF4C	NM_145296.1	0.0182018	0.0431449	-0.065216	0.124219	0.361804	-0.0583433	2.61041e-07	6.68265e-06	-0.231444	0.00119901	0.00387722	-0.208143	0.00200965	0.00445429	-0.137298	4.82527e-06	4.94108e-05	-0.154237
IGSF4C_P533_R	Y	IGSF4C	NM_145296.1	0.711423	0.781412	0.00220349	0.297213	0.515259	-0.00366083	0.00182065	0.00644166	-0.0221399	0.000148352	0.000878521	-0.0332221	0.0045315	0.00886673	-0.0325609	3.43907e-05	0.000228676	-0.0355908
IGSF4_P454_F	Y	IGSF4	NM_014333.2	0.899374	0.931154	0.000294475	0.545235	0.720724	0.0117206	0.0577681	0.114641	-0.00407855	0.000113634	0.000758876	-0.00991258	2.31381e-06	2.52057e-05	-0.0318229	2.46665e-08	1.18399e-06	-0.0291771
IGSF4_P86_R	Y	IGSF4	NM_014333.2	0.189012	0.281867	-0.0114311	0.459025	0.658322	0.0335684	0.000956596	0.00380504	-0.0454949	0.00486078	0.0116659	-0.0575818	0.000526599	0.00153117	-0.12321	1.31266e-05	0.000104315	-0.111807
IHH_E186_F	Y	IHH	NM_002181.1	1.35543e-06	9.6386e-06	0.504498	0.451957	0.653064	-0.0113981	0.104548	0.18443	0.113169	0.065677	0.10288	-0.0262459	0.203207	0.260105	0.118891	0.455114	0.625932	-0.0200104
IHH_P246_R	Y	IHH	NM_002181.1	0.341579	0.439051	0.0245728	0.889033	0.941897	0.00239379	0.442846	0.555728	-0.0207152	0.000261773	0.00128461	-0.0638378	0.000292136	0.000984037	-0.0757854	0.0014269	0.0057076	-0.056271
IHH_P529_F	Y	IHH	NM_002181.1	0.0369286	0.0766545	0.133652	0.074051	0.274845	-0.0267844	0.0450551	0.0939005	0.0722191	0.0306126	0.053677	-0.0307443	0.000853876	0.00221546	-0.0583887	0.902431	0.944233	0.00420641
IL10_P348_F	N	IL10	NM_000572.2	0.0613562	0.114791	-0.0549122	0.373877	0.589924	-0.0135385	0.860176	0.896253	-0.00344733	0.000669268	0.00247351	0.024738	0.110261	0.151757	0.0344146	0.102315	0.202521	-0.0703675
IL10_P85_F	N	IL10	NM_000572.2	1.65144e-05	9.2577e-05	-0.221102	0.0822277	0.292292	-0.0892895	0.210512	0.32146	-0.0750721	0.465342	0.546838	-0.0422427	0.913306	0.925355	0.00523952	0.0732532	0.153922	-0.144813
IL11_E232_F	Y	IL11	NM_000641.2	0.12718	0.209153	0.0665653	0.0537722	0.228793	-0.0238649	0.524274	0.623768	-0.0122727	0.0286876	0.0506485	-0.0234641	0.011228	0.0197777	-0.0521097	1.03619e-06	1.69317e-05	-0.0855678
IL11_P11_R	Y	IL11	NM_000641.2	6.95513e-08	6.51407e-07	0.514228	0.081652	0.292292	0.138	0.0671383	0.129773	0.0929233	0.173628	0.237641	-0.0361152	0.224306	0.283963	-0.0321987	0.850832	0.915822	-0.0079734
IL12A_E287_R	Y	IL12A	NM_000882.2	0.151702	0.23948	0.0854607	0.271591	0.494969	-0.00318084	0.0640691	0.125683	0.101101	0.0256171	0.0459134	-0.00924493	0.0010157	0.00257122	-0.0290948	1.76658e-06	2.4013e-05	-0.0309893
IL12B_E25_F	N	IL12B	NM_002187.2	0.314462	0.414604	0.0166545	0.0299003	0.166683	-0.0829536	4.03671e-06	5.167e-05	0.104673	0.855153	0.891728	-0.0108311	0.486088	0.547384	-0.0478543	0.755396	0.862754	0.00917142
IL12B_P1453_F	Y	IL12B	NM_002187.2	0.0190212	0.044742	0.0567907	4.40612e-07	2.60188e-05	-0.307801	0.0197696	0.0470063	0.0987797	0.278678	0.357304	0.0662573	1.85687e-05	0.000129057	0.244729	0.113312	0.220314	0.099348
IL12B_P392_R	N	IL12B	NM_002187.2	0.0454682	0.089999	0.0737901	0.0951433	0.314329	-0.16188	0.501559	0.605656	0.0475931	0.144097	0.203058	-0.128344	0.0357662	0.0554919	0.260719	0.0199119	0.0542281	0.212696
IL13_E75_R	N	IL13	NM_002188.2	0.0177263	0.0422788	-0.0608368	0.230135	0.459671	-0.0339971	0.24095	0.356987	-0.0135675	0.393047	0.477627	0.00432335	0.000150999	0.000612172	0.128151	0.038504	0.0926994	0.086247
IL16_P226_F	N	IL16	NM_004513.3	0.922657	0.942915	0.00537283	0.0010484	0.0157606	-0.150124	0.727826	0.793176	-0.0131217	0.0225088	0.0409639	-0.121945	0.000566952	0.00159787	-0.124199	0.000174703	0.000912734	-0.106483
IL16_P93_R	N	IL16	NM_004513.3	0.902315	0.931994	0.0090875	0.00915894	0.0756609	-0.227723	0.00176349	0.00629362	-0.171869	3.22139e-06	8.99647e-05	-0.252663	0.00108772	0.00269267	-0.23044	0.0474696	0.108988	-0.138699
IL17RB_E164_R	Y	CHDH	NM_018397.1	8.23881e-11	1.24067e-09	0.646167	0.409417	0.621408	-0.0350126	0.346359	0.463018	0.0581242	0.00291238	0.00753099	-0.0705771	0.000790946	0.00209104	0.484738	0.418258	0.595407	0.062321
IL17RB_P788_R	Y	CHDH	NM_018397.1	9.05511e-21	5.78959e-19	0.698878	0.812215	0.909804	-0.00879154	3.04742e-06	4.13433e-05	0.353039	0.00594513	0.0136702	0.257114	0.0262489	0.0417374	-0.0337375	0.848356	0.914438	0.0080885
IL18BP_E285_F	N	IL18BP	NM_005699.2	0.633634	0.711448	-0.0104394	0.0362931	0.18897	-0.128591	0.505032	0.608763	-0.0156242	0.1105	0.161338	0.0428776	4.00297e-05	0.000228571	0.159552	0.300201	0.475419	0.0521211
IL18BP_P51_R	N	IL18BP	NM_005699.2	0.3792	0.477419	0.0232154	0.896529	0.948395	-0.00652744	0.209176	0.320652	-0.0461162	0.0212046	0.0388204	0.0784902	2.17131e-06	2.39937e-05	0.215379	0.494178	0.659476	0.0357189
IL1A_E113_R	N	IL1A	NM_000575.3	0.227645	0.323163	-0.0128638	0.264419	0.494049	-0.0123183	0.292569	0.413917	-0.00597516	0.150665	0.210306	0.00475824	0.000116566	0.000504353	0.0643354	4.58806e-06	4.80925e-05	0.0599496
IL1B_P582_R	N	IL1B	NM_000576.2	0.0155228	0.0380879	0.0253724	0.596545	0.760409	-0.0201425	0.00485653	0.0144567	0.0358547	0.52859	0.604553	-0.0114969	0.0159854	0.0269343	0.0812049	0.173301	0.308805	0.0396885
IL1B_P829_F	N	IL1B	NM_000576.2	0.0351135	0.0740758	-0.0576701	0.524771	0.710703	-0.0253367	0.562789	0.656373	-0.010489	0.107618	0.158032	0.036488	0.629043	0.680429	-0.0209905	0.839933	0.911114	0.0100724
IL1RN_E42_F	N	IL1RN	NM_173843.1	4.84677e-05	0.000240927	-0.328697	0.433483	0.635947	-0.0380982	0.0407225	0.0862817	-0.0401148	0.209888	0.278882	-0.0405313	0.0585254	0.0865207	0.0367268	0.563331	0.712749	-0.0366068
IL1RN_P93_R	N	IL1RN	NM_173843.1	0.755934	0.81539	-0.0164181	0.0500647	0.220002	0.0943094	0.00523824	0.0152674	0.151305	0.0115253	0.0231411	0.208744	0.00630828	0.0118165	0.2073	0.084808	0.173687	0.143099
IL2_P607_R	N	IL2	NM_000586.2	0.0496219	0.096971	-0.0929788	0.0031018	0.0352916	-0.220872	0.0241591	0.0558022	-0.106787	0.0306085	0.053677	-0.136926	0.0498783	0.0748906	-0.103418	0.931854	0.959278	-0.00439918
IL3_E43_F	N	IL3	NM_000588.3	2.8112e-06	1.80015e-05	-0.412984	0.0866297	0.300368	-0.0800855	0.137423	0.231704	-0.0438858	0.179224	0.243618	-0.06399	6.2184e-05	0.000312139	0.133776	1.25045e-05	0.000101624	0.127116
IL3_P556_F	N	IL3	NM_000588.3	0.0155928	0.0381987	-0.147332	0.0542371	0.229499	-0.0353885	0.775596	0.830764	-0.00199134	0.712888	0.768418	0.00343822	0.000988455	0.00251369	0.0522699	0.643307	0.78174	0.0210034
IL4_P262_R	N	IL4	NM_000589.2	1.68591e-06	1.15092e-05	-0.354404	0.0199209	0.125404	-0.135281	0.00615534	0.0174762	-0.0898868	0.00473435	0.0114339	-0.194266	0.00962014	0.0172623	-0.0920844	0.521785	0.682676	-0.0335273
IL6_E168_F	N	IL6	NM_000600.1	0.00501631	0.0145929	0.175267	0.131132	0.367893	-0.0311017	0.00504014	0.0149103	0.238359	0.948011	0.961786	0.00351876	4.51792e-05	0.000251432	-0.109849	0.282505	0.4539	-0.0465485
IL6_P213_R	N	IL6	NM_000600.1	3.02574e-22	3.87295e-20	0.657196	0.171715	0.402479	-0.078271	0.0435806	0.0911987	0.174093	0.467148	0.547739	0.0699703	0.00253257	0.00541034	-0.19355	0.279879	0.450623	-0.0802236
IL6_P611_F	N	IL6	NM_000600.1	7.1192e-15	1.79264e-13	0.538125	0.159483	0.389546	-0.116896	0.0110764	0.0289342	0.20248	0.471883	0.551607	-0.0535812	1.82221e-09	7.36556e-08	0.460552	0.152605	0.278386	0.121347
IL8_E118_R	N	IL8	NM_000584.2	0.0979941	0.169122	0.129922	0.00230254	0.0287536	-0.0990057	0.233215	0.348462	-0.0729213	5.96948e-09	2.39534e-06	-0.382963	0.00016617	0.000657827	-0.298732	0.000475278	0.0022122	-0.287895
IL8_P83_F	N	IL8	NM_000584.2	0.419778	0.513768	0.0445337	6.97827e-06	0.00024927	-0.386458	0.461121	0.571195	-0.0491915	5.32452e-08	7.43497e-06	-0.35986	0.00789615	0.0144044	-0.241649	0.00096443	0.00403641	-0.370351
IMPACT_P186_F	Y	IMPACT	NM_018439.1	0.0413592	0.0836992	0.138624	0.669468	0.816762	-0.00335047	0.0101394	0.0268519	-0.0160133	5.37636e-06	0.000108787	-0.0326602	0.428035	0.492112	-0.0185368	0.637783	0.778106	0.0179602
IMPACT_P234_R	Y	IMPACT	NM_018439.1	2.34697e-05	0.000125608	0.439144	0.923414	0.961048	0.00214989	0.460504	0.570891	0.0257219	0.000924352	0.00314813	-0.0311746	0.143274	0.191198	0.136254	0.51935	0.680069	0.0279738
INHA_P1144_R	Y	INHA	NM_002191.2	0.331218	0.430773	0.00294246	0.158199	0.389546	0.00687018	4.27364e-05	0.00032178	-0.0208525	0.000652763	0.00244547	-0.0236963	0.000444598	0.00135766	-0.0328073	2.29274e-05	0.000165335	-0.0293813
INHA_P1189_F	Y	INHA	NM_002191.2	0.453935	0.547211	0.00237103	0.809172	0.909804	0.00108615	0.000342124	0.00164734	-0.0268542	0.000370432	0.00162567	-0.0382803	7.10495e-05	0.000348665	-0.0800845	1.31752e-05	0.000104315	-0.0693247
INSR_E97_F	Y	INSR	NM_000208.1	0.461126	0.553351	0.00902044	0.174587	0.403823	-0.013718	1.03607e-06	1.80842e-05	-0.0558248	0.000766977	0.00272703	-0.0546364	1.90861e-05	0.000130876	-0.120854	6.38362e-08	1.9226e-06	-0.114138
INSR_P1063_R	Y	INSR	NM_000208.1	2.21304e-26	2.06479e-23	0.784887	0.421108	0.63043	-0.0242838	0.114716	0.199777	0.0701455	0.202011	0.270359	-0.025237	0.043281	0.0657563	0.147834	0.239969	0.399775	-0.0317714
INS_P248_F	N	INS	NM_000207.1	0.56765	0.648261	0.0229542	0.700925	0.84111	-0.0230938	0.292922	0.413917	-0.0564772	0.00980907	0.0204156	-0.195473	0.0359334	0.0556094	0.0731499	0.549017	0.703905	-0.047429
INS_P804_R	N	INS	NM_000207.1	0.00812477	0.0215911	-0.132108	0.0952828	0.314329	-0.0480684	0.297047	0.419361	-0.0425722	0.00186015	0.00534408	-0.280251	0.337325	0.407016	-0.0488831	0.712968	0.833427	-0.0288567
IPF1_P234_F	Y	IPF1	NM_000209.1	0.00170655	0.0058121	0.276083	0.0906467	0.310097	0.115244	0.0112417	0.0293162	-0.121145	0.0101223	0.0208137	-0.149377	0.297728	0.364972	0.0725156	0.060136	0.131392	0.154323
IPF1_P750_F	Y	IPF1	NM_000209.1	0.73497	0.799515	0.0318588	0.621731	0.779575	-0.0479882	0.111154	0.194412	-0.0856702	0.000148708	0.000878521	-0.219579	0.366647	0.43488	0.112242	0.0370793	0.0905467	0.208749
IRAK1_P312_F	Y	IRAK1	NM_001569.3	0.201715	0.2948	-0.12684	0.11195	0.340175	-0.1527	0.279447	0.399666	-0.0877744	0.988435	0.991015	0.00163978	0.419802	0.48337	0.0603665	0.0254716	0.0667652	0.193744
IRAK1_P455_R	Y	IRAK1	NM_001569.3	0.0221432	0.050613	-0.113816	0.177864	0.407152	-0.079522	0.115861	0.201088	-0.0720626	0.0329052	0.0567892	-0.125535	0.371774	0.439265	-0.0218601	0.0107469	0.0328829	0.112634
IRAK3_E130_F	Y	IRAK3	NM_007199.1	0.0136861	0.0340711	0.111535	0.557606	0.728922	-0.00137926	0.493995	0.600774	0.0289987	0.000106601	0.000721316	-0.0290459	1.01199e-06	1.37558e-05	0.64743	0.0028233	0.0105771	0.254091
IRAK3_P13_F	Y	IRAK3	NM_007199.1	0.138081	0.223256	0.0610727	0.624238	0.780806	-0.00382898	0.79555	0.844482	0.00976088	3.80656e-05	0.000403233	-0.0311376	0.000303962	0.00101058	0.38274	0.336987	0.513716	0.0731526
IRAK3_P185_F	Y	IRAK3	NM_007199.1	0.000223656	0.000964987	0.348128	0.82689	0.914133	-0.00733504	0.586911	0.675553	0.0332391	0.00127514	0.0040544	-0.075922	0.000619523	0.00170841	0.410298	0.00338049	0.0122753	0.266544
IRF5_E101_F	Y	IRF5	NM_032643.3	5.28906e-06	3.23665e-05	0.206968	0.0206627	0.127975	0.0939042	0.804019	0.851164	-0.00382235	0.16519	0.227767	-0.0324738	0.0269139	0.0426623	0.166078	0.153269	0.279267	0.0499059
IRF5_P123_F	Y	IRF5	NM_032643.3	0.0374692	0.0775643	0.177168	0.172437	0.402479	-0.0144496	0.465002	0.575538	0.0221283	0.00118324	0.00384242	-0.0324025	0.759038	0.799645	0.0142565	0.00018829	0.000973784	-0.0446845
IRF7_E236_R	Y	IRF7	NM_004029.1	0.661445	0.737615	-0.00419854	0.917954	0.959821	-0.00181213	4.2505e-08	1.67404e-06	-0.399096	9.98955e-09	2.55732e-06	-0.453515	0.00454896	0.00888334	-0.0934295	0.332973	0.510426	-0.0385962
IRF7_P277_R	Y	IRF7	NM_004029.1	0.878292	0.917102	-0.00153924	0.000229235	0.00463627	-0.0119031	1.39526e-06	2.23242e-05	-0.317978	0.00105176	0.0034892	-0.298812	0.0147802	0.0251133	-0.0571581	0.335936	0.513716	-0.0304169
ISL1_E87_R	Y	LOC642366	XM_930750.1	0.377196	0.475286	-0.00511095	0.319322	0.53926	-0.00716757	7.73147e-05	0.0005138	-0.0308063	0.000260808	0.00128398	-0.0417598	0.00131538	0.00314217	-0.0524205	0.321101	0.498193	0.0606769
ISL1_P379_F	Y	ISL1	NM_002202.1	0.144494	0.229992	-0.00676897	0.820442	0.91385	-0.00127117	0.00115241	0.0043918	-0.0301699	0.00593945	0.0136702	-0.0383476	0.00357337	0.00719357	-0.0286921	0.0860855	0.175834	0.141566
ISL1_P554_F	Y	ISL1	NM_002202.1	0.126841	0.208818	-0.01334	0.276301	0.499292	-0.0102713	3.82039e-05	0.000294881	-0.0455561	2.31619e-05	0.000295031	-0.0652138	0.484199	0.546057	-0.0213155	0.367989	0.548768	0.0566255
ITGA2_E120_F	Y	ITGA2	NM_002203.2	0.530834	0.615367	-0.00182383	0.908552	0.956097	0.000364744	0.782945	0.836303	0.00362907	0.00765189	0.0166713	-0.0135074	0.495462	0.556309	-0.00948014	0.0882313	0.179739	-0.0213766
ITGA2_P26_R	Y	ITGA2	NM_002203.2	0.24121	0.337675	-0.00596293	0.823007	0.914133	-0.00154786	0.000734297	0.00304011	-0.0243253	0.0243631	0.0437728	-0.0268414	0.312296	0.3801	-0.0269189	8.41575e-06	7.6437e-05	-0.0628564
ITGA6_P298_R	Y	ITGA6	NM_000210.1	0.0737361	0.132777	0.0881034	0.0823974	0.292292	-0.0135285	0.771655	0.828855	0.0119216	0.000135956	0.000842051	-0.0374864	0.952859	0.958475	0.00185735	0.892932	0.936847	0.00593592
ITGA6_P718_R	Y	ITGA6	NM_000210.1	0.747472	0.809103	0.00181608	0.112479	0.340175	-0.0326669	0.0127385	0.0325563	0.0142398	0.0015497	0.004631	0.0250633	4.73925e-06	4.5403e-05	0.152872	1.16858e-08	6.18942e-07	0.14809
ITGB1_P451_F	Y	ITGB1	NM_033667.1	0.721015	0.788241	0.00216338	0.76455	0.879662	-0.00186133	8.97373e-06	9.9038e-05	-0.0310208	0.000395874	0.0017202	-0.0362907	1.79721e-07	3.36648e-06	-0.130741	4.59474e-11	1.4115e-08	-0.125409
ITGB4_E144_F	Y	ITGB4	NM_000213.3	0.0216351	0.0495993	0.0451164	0.649875	0.800656	0.00156682	0.0515362	0.105546	-0.00685577	0.00403482	0.00993955	-0.0122536	4.60303e-05	0.000254326	-0.0412454	0.0198656	0.0541982	-0.0276827
ITGB4_P517_F	Y	ITGB4	NM_000213.3	1.29173e-06	9.27149e-06	0.43052	0.184816	0.413815	-0.0604019	0.282744	0.403619	0.0811588	0.763169	0.815179	-0.0197366	0.441088	0.5041	-0.0377411	0.556224	0.709013	0.0348645
ITK_E166_R	N	ITK	NM_005546.3	0.00160396	0.0054993	-0.219039	0.0518005	0.223746	-0.0627389	0.00245081	0.00829174	-0.0721058	0.0239241	0.0431815	-0.127032	0.00215126	0.00472428	0.0650163	0.483741	0.653496	-0.0415751
ITK_P114_F	N	ITK	NM_005546.3	0.000216294	0.000935851	-0.261053	0.0573556	0.236823	-0.120583	0.00738153	0.020319	-0.155963	0.0213641	0.0390657	-0.176538	0.000513657	0.00151726	-0.227456	0.0279116	0.0721754	-0.0878569
ITPR2_P804_F	Y	ITPR2	NM_002223.1	1.65616e-09	2.10236e-08	0.481295	0.000674305	0.0111369	-0.0657291	0.0181557	0.0436418	0.160133	0.00198047	0.00555109	-0.0300142	1.06394e-06	1.42105e-05	0.513188	0.662996	0.798089	-0.0289411
ITPR3_E86_R	Y	ITPR3	NM_002224.1	0.108664	0.184428	0.110377	0.712428	0.846318	-0.00296117	0.00743533	0.020394	0.225386	0.326511	0.410747	0.0235295	0.243958	0.305644	0.0625801	0.369927	0.551123	-0.021258
ITPR3_P1112_F	Y	ITPR3	NM_002224.1	0.0132345	0.0334346	0.0628626	0.28787	0.508772	0.00393742	0.0396949	0.0848002	0.0305246	0.537613	0.612138	0.00960447	0.00111782	0.00275597	-0.0278146	0.147168	0.272021	-0.0174681
JAG1_P66_F	Y	JAG1	NM_000214.1	0.382632	0.480165	0.041141	0.567656	0.737042	0.0019206	9.81478e-06	0.000105423	-0.0234359	0.000183611	0.00101815	-0.0290279	1.60032e-05	0.000118178	-0.0398978	1.11307e-07	2.94772e-06	-0.0364134
JAG2_E54_F	Y	JAG2	NM_145159.1	0.47263	0.562096	0.0100449	0.432194	0.635947	0.0026383	0.000228563	0.00118206	-0.0110478	0.000950168	0.00322176	-0.0126044	0.000142241	0.000586754	-0.0311477	1.97981e-06	2.62154e-05	-0.0287986
JAG2_P264_F	Y	JAG2	NM_145159.1	0.00106938	0.00383887	0.271637	0.162949	0.39122	0.00725332	0.426298	0.540718	0.0388383	5.38267e-06	0.000108787	-0.0287499	0.0266059	0.0422176	0.160735	0.108635	0.213079	-0.0300635
JAK2_P772_R	Y	JAK2	NM_004972.2	0.99817	0.99817	1.40585e-05	0.759509	0.878091	-0.00344382	2.94838e-06	4.07992e-05	-0.0420793	5.93302e-05	0.000509113	-0.0496048	0.000344968	0.00112024	-0.0503883	6.68653e-08	1.95635e-06	-0.061321
JAK3_E64_F	Y	JAK3	NM_000215.2	0.00092301	0.00338364	0.300524	0.250021	0.480641	-0.0199427	0.311901	0.43055	0.0205787	0.947957	0.961786	-0.00191291	1.0193e-07	2.08753e-06	0.675708	0.0999677	0.198347	0.121502
JAK3_P1075_R	N	JAK3	NM_000215.2	0.00536557	0.0153473	-0.180093	0.174832	0.403823	-0.105293	0.3483	0.464399	-0.0438182	0.161667	0.223511	0.0712347	0.747731	0.7899	-0.0312174	0.915798	0.951736	0.00878184
JAK3_P156_R	N	JAK3	NM_000215.2	4.41965e-09	5.18212e-08	0.348408	0.00429302	0.0443538	-0.248097	0.00471069	0.0141321	0.178648	1.07612e-06	5.332e-05	0.321237	2.58542e-08	6.84689e-07	0.49106	0.117773	0.226125	0.150095
JUNB_P1149_R	Y	JUNB	NM_002229.2	0.542448	0.62412	0.0246625	0.215879	0.443615	-0.0186497	0.708146	0.779722	-0.0125065	1.92936e-06	7.5131e-05	-0.0969839	0.198833	0.255144	0.143439	0.40812	0.58806	-0.0567523
KCNK4_E3_F	Y	KCNK4	NM_016611.2	8.61646e-24	2.20581e-21	0.645186	0.260548	0.49228	-0.0541113	6.22428e-09	5.57935e-07	0.435571	0.24776	0.322235	-0.0704234	0.606607	0.660346	-0.0171326	0.353511	0.533392	0.0456763
KCNK4_P171_R	N	KCNK4	NM_016611.2	2.77446e-09	3.35556e-08	0.367616	0.0851323	0.299229	-0.117238	8.7023e-05	0.000561627	0.249343	0.703751	0.762314	-0.0300824	0.198827	0.255144	-0.0745936	0.262814	0.428537	0.0826254
KCNQ1_E349_R	Y	KCNQ1	NM_181797.1	0.913741	0.936295	0.000660876	0.926803	0.961048	0.000587603	0.000138317	0.000801715	-0.0209629	0.000574163	0.00224997	-0.0245861	7.85561e-05	0.000375895	-0.0699612	0.0581541	0.12834	-0.0416812
KCNQ1_P546_R	Y	KCNQ1	NM_181797.1	0.950957	0.964138	-0.00303617	0.486005	0.678639	-0.0278189	0.188321	0.295768	-0.0390301	0.0127618	0.0252605	-0.084783	0.408365	0.472326	-0.0657735	0.00589777	0.0195658	-0.113137
KDR_E79_F	Y	KDR	NM_002253.1	0.674964	0.748552	0.00684658	0.106991	0.329997	-0.00628669	0.000267066	0.00132755	-0.0207917	0.0011069	0.00364849	-0.0249716	7.61126e-07	1.11342e-05	-0.0868831	4.8138e-06	4.94108e-05	-0.0750628
KDR_P445_R	Y	KDR	NM_002253.1	0.00980141	0.0256037	0.21226	0.0333561	0.179876	-0.0112207	0.104582	0.18443	-0.0129214	0.00563836	0.013122	-0.0260617	0.000585584	0.00163241	-0.0241868	0.176348	0.312783	-0.0126469
KIAA0125_E29_F	N	KIAA0125	NM_014792.2	2.57227e-06	1.67415e-05	-0.337339	0.00625468	0.0585702	-0.201692	0.000424811	0.00196905	-0.181471	0.179208	0.243618	-0.0832847	0.921401	0.930488	0.0080519	0.0838271	0.171914	0.135761
KIAA1804_P689_R	Y	KIAA1804	NM_032435.1	9.00583e-10	1.21342e-08	0.504137	0.870455	0.938386	0.0150724	0.189062	0.296024	0.0206889	0.727899	0.782402	0.007049	1.98554e-09	7.81996e-08	0.65853	0.0573413	0.127278	0.164185
KIT_P367_R	Y	KIT	NM_000222.1	2.6159e-05	0.000138553	0.403281	0.268868	0.494969	-0.020769	0.0483453	0.100138	0.111839	0.00760957	0.0166027	-0.0646016	3.15589e-05	0.000192359	0.463266	0.173979	0.309655	0.0850502
KIT_P405_F	Y	KIT	NM_000222.1	0.0357048	0.0748794	0.145586	0.532695	0.713979	-0.0048257	0.200928	0.310802	0.0679477	0.00131341	0.00411714	-0.023234	0.289391	0.356459	0.0456351	0.514755	0.676938	0.0251903
KLF5_E190_R	Y	KLF5	NM_001730.3	0.385281	0.482158	-0.00219833	0.497656	0.688349	0.00258833	0.000209854	0.00108897	-0.014797	0.00466244	0.0112958	-0.0164991	6.18713e-05	0.000311588	-0.0370441	0.000194492	0.00100094	-0.0321777
KLF5_P13_F	Y	KLF5	NM_001730.3	0.768955	0.826533	-0.000708308	0.627975	0.784202	0.00193054	0.000130843	0.000770017	-0.0141578	7.04569e-06	0.00012732	-0.0227542	0.00126048	0.00303464	-0.0506972	0.182139	0.320068	-0.0280202
KLK10_E77_R	N	KLK10	NM_002776.3	0.241385	0.337675	0.0609161	0.525839	0.710703	-0.0137569	0.161496	0.263331	0.058365	0.240326	0.31443	0.0776123	0.3581	0.427221	0.0716531	0.979334	0.985752	-0.00123154
KLK10_P268_R	N	KLK10	NM_002776.3	0.755163	0.81513	-0.0250652	0.00012508	0.00286752	-0.20809	0.0593083	0.117394	0.135357	0.288888	0.368787	0.0803438	0.0296061	0.0466888	0.195431	0.436639	0.611931	0.0747424
KLK11_P103_R	N	KLK11	NM_144947.1	1.70157e-07	1.40517e-06	-0.385337	0.00018812	0.00401324	-0.315099	0.00445471	0.0134694	-0.161353	4.51487e-07	3.29629e-05	-0.365869	0.129909	0.175651	-0.123194	0.327733	0.50542	-0.0953972
KLK11_P1290_F	N	KLK11	NM_144947.1	0.000319614	0.00133404	-0.234658	0.0631804	0.250116	-0.0832625	0.0843277	0.154941	-0.0296457	0.203933	0.272384	-0.0425347	0.000259866	0.000901026	0.119172	0.37235	0.552856	0.0631775
KRAS_E82_F	Y	KRAS	NM_033360.2	0.284627	0.385187	-0.0679059	0.405322	0.617675	-0.0564391	0.0118813	0.0307234	-0.101936	0.902335	0.931443	0.00786988	0.00039544	0.00125755	-0.232859	2.68244e-05	0.000186436	-0.246773
KRAS_P651_F	Y	KRAS	NM_033360.2	9.93759e-13	2.12002e-11	0.604265	0.000873037	0.0138246	-0.0244535	0.00287338	0.00935067	-0.0181192	0.00443411	0.0108108	-0.0228806	1.08171e-07	2.15779e-06	-0.17205	3.82888e-11	1.4115e-08	-0.165082
KRT13_P341_R	N	KRT13	NM_002274.2	0.00727665	0.0196087	-0.15574	0.331738	0.552449	-0.0359841	0.00408748	0.0125819	0.0232737	0.205221	0.273629	0.0177953	0.000583316	0.00163201	0.0941171	0.967706	0.975966	0.00233571
KRT13_P676_F	N	KRT13	NM_002274.2	0.000652514	0.00247242	-0.247008	0.174419	0.403823	-0.0701502	0.573561	0.664898	-0.0151438	0.229695	0.301549	0.0293555	0.000487079	0.00145971	0.116237	0.393522	0.574661	-0.0561533
KRT1_P798_R	N	KRT1	NM_006121.2	1.05526e-05	6.04807e-05	-0.283919	0.00155764	0.0211729	-0.229874	0.498637	0.604102	0.032651	0.11374	0.165284	-0.0971243	0.193745	0.249868	-0.113151	0.544683	0.700111	-0.0493281
KRT5_E196_R	Y	KRT5	NM_000424.2	0.0136778	0.0340711	-0.153414	0.143802	0.382999	-0.03356	0.569171	0.66215	-0.0182732	0.661066	0.724249	-0.00714268	0.000173257	0.000676794	0.0848408	2.75374e-06	3.30449e-05	0.0802887
KRT5_P308_F	N	KRT5	NM_000424.2	0.0010463	0.00377949	-0.175223	0.131493	0.367893	-0.0768104	0.0279891	0.0623966	0.0323515	0.705554	0.76277	0.0118329	1.04217e-05	8.48127e-05	0.242105	0.00361361	0.0130294	0.169524
L1CAM_P148_R	Y	L1CAM	NM_024003.1	0.159884	0.249829	-0.0162564	0.928715	0.961258	0.00213937	3.11763e-06	4.13433e-05	-0.0299833	0.000115915	0.000764406	-0.0335782	0.00048752	0.00145971	-0.0621518	0.0138259	0.0397688	-0.0437424
L1CAM_P19_F	Y	L1CAM	NM_024003.1	0.0168055	0.0405382	-0.118164	0.0858602	0.300034	-0.10002	0.965488	0.97501	0.00250768	0.377552	0.463792	-0.0487047	0.481488	0.543398	-0.0191817	0.0415678	0.0986833	0.21374
LAMB1_E144_R	Y	LAMB1	NM_002291.1	0.481035	0.568361	-0.00599905	0.952513	0.971488	0.00112369	0.560851	0.654611	0.0234655	0.000132918	0.000833316	-0.0412586	5.32743e-05	0.00028217	-0.0979466	1.2374e-07	3.22144e-06	-0.0967339
LAMC1_E466_R	Y	LAMC1	NM_002293.2	0.200676	0.29384	0.00319834	0.428572	0.634537	0.0101666	3.23567e-06	4.24785e-05	-0.0177055	1.09087e-05	0.000178253	-0.0230966	2.26725e-05	0.000147563	-0.0327794	0.307247	0.483536	-0.0156448
LAMC1_P808_F	Y	LAMC1	NM_002293.2	0.412619	0.506416	0.00635588	0.318107	0.53812	0.0230771	0.0571412	0.113543	0.0943289	0.614539	0.683018	0.024946	0.885217	0.901653	0.0128432	0.014763	0.0421486	-0.124839
LAT_E46_F	N	LAT	NM_014387.3	0.192915	0.286021	-0.0526968	0.500499	0.690203	-0.0420275	0.168975	0.273206	0.0321647	5.32047e-05	0.000477115	0.0847136	8.18728e-05	0.000383909	0.267048	0.00649124	0.0213502	0.154357
LCK_E28_F	Y	LCK	NM_005356.2	0.123335	0.204361	-0.0483609	0.0513454	0.223746	-0.0798915	0.940827	0.955129	-0.000874995	0.441244	0.524711	-0.0259284	0.000359083	0.00115387	0.124815	0.000121726	0.000660676	0.098024
LCN2_P141_R	N	LCN2	NM_005564.2	0.442039	0.536313	-0.0149323	0.854362	0.932031	-0.00451126	1.34879e-08	8.56466e-07	0.160495	3.82744e-06	9.67136e-05	0.182466	0.413786	0.477517	-0.0325608	0.11378	0.220876	-0.061893
LCN2_P86_R	N	LCN2	NM_005564.2	0.0186532	0.0441469	0.0576244	0.225067	0.451424	0.0508671	1.35876e-08	8.56466e-07	0.272306	9.17415e-06	0.000158331	0.297628	0.495177	0.556309	0.0458795	0.402069	0.582072	-0.0694165
LEFTY2_P561_F	N	LEFTY2	NM_003240.2	0.453834	0.547211	-0.0528842	3.31898e-12	8.4966e-10	-0.328954	0.0659088	0.128309	-0.0923162	0.454853	0.537013	-0.0434316	0.000145918	0.000599279	-0.308485	0.000103283	0.00057505	-0.2727
LEFTY2_P719_F	N	LEFTY2	NM_003240.2	0.472805	0.562096	0.0227412	4.46542e-09	5.27606e-07	-0.549225	0.0178368	0.0430776	-0.0508592	0.547354	0.62047	-0.0110162	0.203916	0.260795	-0.0999746	0.147914	0.27257	-0.119265
LIF_E208_F	Y	LIF	NM_002309.2	0.972142	0.979154	-0.000115983	0.592251	0.756191	0.0124384	0.000207587	0.00108454	-0.0134438	0.000699972	0.00254174	-0.0159267	0.000186958	0.000716128	-0.0405066	0.245589	0.406491	-0.0211072
LIF_P383_R	N	LIF	NM_002309.2	0.0726563	0.131147	0.0949474	0.0005264	0.00918807	-0.249846	0.0563491	0.112698	-0.109422	0.387446	0.471941	-0.0593187	0.000174045	0.000676794	0.396038	0.775187	0.872299	0.0264542
LIG3_P622_R	N	LIG3	NM_013975.2	0.311274	0.412182	-0.0841382	0.00111265	0.0162765	-0.196466	0.000260801	0.00130062	-0.217502	2.59388e-06	8.25923e-05	-0.31385	0.292364	0.359257	-0.0696678	0.395425	0.575709	0.0629233
LIG4_P194_F	Y	LIG4	NM_002312.3	0.312829	0.41316	0.0575069	0.719033	0.85153	0.001393	3.03699e-05	0.000246816	-0.0172934	6.28897e-05	0.000524993	-0.0232824	2.86564e-05	0.000179658	-0.0481721	1.62428e-07	3.96014e-06	-0.0443755
LIMK1_P709_R	N	LIMK1	NM_002314.2	0.014391	0.0356823	-0.165552	3.03358e-05	0.000879165	-0.337436	0.448393	0.560856	-0.0343817	0.00813365	0.0175467	-0.17702	0.255319	0.317804	0.112505	0.0476464	0.109231	0.164879
LMO1_E265_R	Y	LMO1	NM_002315.1	0.00642295	0.017776	0.242737	0.34791	0.568456	-0.0219479	0.17633	0.282718	-0.0407887	4.15955e-05	0.000415217	-0.111565	0.110554	0.151889	-0.0492089	0.613688	0.755309	-0.0270789
LMO1_P169_F	Y	LMO1	NM_002315.1	0.357786	0.455688	0.0206511	0.101911	0.32409	0.0049423	0.00370862	0.0115546	-0.0080574	3.60434e-05	0.000397513	-0.0157532	0.00262718	0.00553884	-0.0250917	0.623513	0.764496	0.01229
LMO2_E148_F	N	LMO2	NM_005574.2	0.630067	0.708789	-0.00765192	0.730301	0.860892	-0.0054699	0.341305	0.459058	-0.0474586	0.432789	0.516924	0.00744045	0.00242905	0.00522551	0.0837749	0.348691	0.527674	-0.0516165
LMO2_P794_R	N	LMO2	NM_005574.2	0.443519	0.53726	-0.0107321	0.325046	0.546249	0.00883615	0.595188	0.683776	-0.0277054	0.015824	0.0306117	0.0189942	0.00249483	0.00534457	0.0522544	0.166123	0.299138	-0.097596
LMTK2_P1034_F	N	LMTK2	NM_014916.2	0.00241356	0.0078377	-0.203743	0.497888	0.688349	-0.0268206	0.371814	0.485222	-0.0243043	0.000161359	0.000924807	0.0855171	4.66532e-05	0.000255926	0.217392	0.010228	0.0316099	0.185206
LOX_P313_R	Y	LOX	NM_002317.3	0.181257	0.274567	0.111592	0.219706	0.444919	-0.0241692	0.000237752	0.00122136	0.304681	0.0685309	0.106542	0.159318	0.110523	0.151889	0.199121	0.584386	0.730958	0.0419981
LOX_P71_F	Y	LOX	NM_002317.3	0.710787	0.781412	0.00908409	0.408343	0.620391	-0.00829143	0.251933	0.368894	0.0476872	0.00770132	0.0167553	-0.0216304	0.00273327	0.00571975	-0.0535504	9.62286e-06	8.14601e-05	-0.0583558
LRP2_E20_F	Y	LRP2	NM_004525.1	0.269233	0.368248	0.0295067	0.5711	0.739668	0.00242128	0.514492	0.615162	-0.00270648	0.088187	0.13241	-0.00799356	8.293e-05	0.000387175	-0.104525	9.11957e-08	2.50137e-06	-0.105691
LRRC32_E157_F	N	LRRC32	NM_005512.1	0.0223005	0.0508213	-0.061305	0.0619874	0.247306	-0.0407399	0.0480101	0.0996535	-0.0511058	0.629212	0.694802	-0.00886688	0.000217252	0.000799089	0.0635608	0.0123246	0.036335	0.040458
LRRC32_P865_R	Y	LRRC32	NM_005512.1	0.00193325	0.00645537	0.237643	0.557142	0.728922	0.0014358	0.0041098	0.0126231	-0.008849	0.000703165	0.0025443	-0.014503	0.757921	0.799016	-0.00523607	3.69047e-07	7.76515e-06	-0.0251405
LRRK1_P39_F	N	LRRK1	NM_024652.2	0.00710465	0.0193146	-0.0280195	0.19116	0.422756	-0.0221578	0.177108	0.283374	0.0109832	0.00121739	0.00392552	0.02727	0.236731	0.297317	0.0370466	0.000197974	0.00101026	0.0799258
LRRK1_P834_F	N	LRRK1	NM_024652.2	0.00826564	0.0219275	-0.168622	0.207376	0.439666	-0.0996861	0.0850547	0.156086	-0.106483	0.14327	0.202263	-0.096927	0.22714	0.286678	-0.08396	0.366199	0.547694	0.0846731
LTA_E28_R	N	LTA	NM_000595.2	0.437291	0.531813	-0.0553999	0.143492	0.382999	-0.120301	0.751024	0.812948	0.018423	0.119493	0.172663	0.091472	0.183407	0.238424	0.0658223	0.0432124	0.101645	-0.169361
LTA_P214_R	N	LTA	NM_000595.2	3.08092e-05	0.000158271	-0.20585	0.000579828	0.00968061	-0.241275	0.132078	0.22392	-0.03615	0.00538769	0.012673	-0.156931	0.0399347	0.0612173	0.0696001	0.38738	0.568305	0.0432151
LTB4R_E64_R	N	LTB4R	NM_181657.1	0.68071	0.752209	-0.00794142	0.0455255	0.211293	-0.156495	0.00011719	0.000703691	0.12901	0.000104113	0.000710744	0.165587	0.00140879	0.00330366	0.100237	0.572201	0.721594	-0.0358159
LTB4R_P163_F	N	LTB4R	NM_181657.1	0.0458248	0.0905881	-0.0612733	0.0901892	0.30922	-0.0539052	0.121556	0.208642	-0.0297628	0.129834	0.185354	-0.0217527	0.186032	0.241135	0.0373557	0.367084	0.548063	-0.0454207
LY6G6E_E300_R	N	LY6G6E	NM_024123.1	0.000736607	0.00276633	-0.169193	0.0722627	0.27362	-0.0910159	0.0842411	0.154941	-0.0749315	0.00603677	0.0137983	-0.15908	0.279235	0.345334	-0.0419538	0.822363	0.902895	-0.0142067
LY6G6E_P45_R	N	LY6G6D	NM_021246.2	0.00104822	0.00377949	-0.273508	0.00323371	0.0365219	-0.24479	0.00466422	0.01402	-0.175675	0.000439818	0.00186356	-0.28617	0.124171	0.168487	0.157764	0.0234627	0.0624547	0.153388
LYN_E353_F	Y	LYN	NM_002350.1	0.535725	0.619167	-0.0104895	0.271647	0.494969	-0.0204592	0.000202034	0.00106977	-0.0420268	2.14936e-05	0.000279781	-0.064048	0.00456597	0.00890017	-0.108561	0.0463916	0.106833	-0.0720513
LYN_P241_F	Y	LYN	NM_002350.1	1.70256e-08	1.75513e-07	0.553438	0.00989809	0.0775687	-0.0245666	1.49361e-05	0.000143387	-0.0351216	3.24372e-05	0.000368743	-0.0491474	7.37312e-10	3.60398e-08	0.609317	0.574881	0.723929	0.0433865
MAD2L1_E93_F	Y	LOC645555	XM_932966.1	0.0970344	0.167843	-0.0447714	0.0686821	0.264174	-0.0896734	0.479315	0.589926	-0.0127278	0.381982	0.467882	0.0211802	0.131905	0.178038	0.0753013	0.0170824	0.0477933	0.0894192
MAF_E77_R	Y	MAF	NM_005360.3	0.693087	0.764236	0.00486151	0.602816	0.764977	-0.00560259	0.00649066	0.0182594	-0.0282116	0.000475504	0.00197933	-0.0430526	1.26567e-05	9.74819e-05	-0.0920807	0.00428276	0.0150533	-0.0701498
MAF_P826_R	Y	MAF	NM_005360.3	0.00437604	0.0129511	0.367693	0.0105627	0.0807177	-0.0396228	0.348672	0.464492	-0.0149202	0.00518405	0.0123041	-0.0385547	0.000628302	0.00172952	-0.0497742	0.0610144	0.132745	-0.0333916
MAGEA1_E113_R	N	MAGEA1	NM_004988.3	0.000213588	0.000926855	-0.259921	0.0383849	0.195494	-0.187378	0.11862	0.204921	-0.0653208	0.0211174	0.0387531	-0.17435	0.023777	0.0384437	0.161798	0.0029095	0.0108208	0.148901
MAGEA1_P926_F	N	MAGEA1	NM_004988.3	0.014403	0.0356823	-0.0925732	0.292469	0.510507	-0.0454969	0.739529	0.803336	-0.00361883	0.342289	0.427096	-0.0281529	0.0203769	0.0335466	0.0843867	0.2291	0.38543	0.0623317
MAGEC3_E307_F	N	MAGEC3	NM_138702.1	0.0050709	0.0147238	-0.141061	0.0445269	0.208516	-0.156424	0.0321557	0.0705589	0.0485085	0.605626	0.676048	0.0254993	0.557858	0.61492	0.034432	0.446745	0.620435	0.0412877
MAGEC3_P903_F	N	MAGEC3	NM_138702.1	1.98353e-07	1.62059e-06	-0.315392	0.0165686	0.11162	-0.245913	0.0666898	0.129338	-0.0872878	0.340341	0.425357	-0.0515802	0.0891154	0.124664	-0.148833	0.987538	0.990764	-0.00121982
MAGEL2_E166_R	N	MAGEL2	NM_019066.2	0.161409	0.251189	-0.0195102	0.218716	0.444919	-0.0457731	0.520178	0.620819	0.0100615	0.330144	0.414298	-0.0411456	0.0430123	0.0654776	0.105679	0.0068285	0.0222688	0.108597
MAGEL2_P170_R	Y	MAGEL2	NM_019066.2	0.0538823	0.103713	-0.044699	0.218941	0.444919	-0.0740445	0.957653	0.969009	-0.00170632	0.019057	0.0356101	-0.124132	0.00177052	0.00398174	0.11304	0.0684764	0.146083	0.0879521
MALT1_P406_R	Y	MALT1	NM_006785.2	0.454228	0.547211	0.0274408	0.36748	0.583712	0.0112491	2.39083e-06	3.40029e-05	-0.0508987	0.00242616	0.00652642	-0.0500102	0.188826	0.244345	-0.018992	3.47017e-06	3.91925e-05	-0.0408021
MAP2K6_E297_F	N	MAP2K6	NM_002758.2	0.883225	0.919128	0.000707251	0.827243	0.914133	0.0018078	2.55518e-05	0.000216838	-0.0370239	0.000519456	0.00211641	-0.0448691	0.020149	0.0332784	-0.0271845	4.84255e-05	0.000299926	-0.034598
MAP2K6_P297_R	Y	MAP2K6	NM_002758.2	0.495923	0.583707	0.019329	0.0478433	0.218295	-0.0326971	0.24084	0.356987	0.0439754	0.00647813	0.0144839	-0.0441354	0.024621	0.039683	0.119687	0.333917	0.511363	0.0459288
MAP3K1_E81_F	Y	MAP3K1	XM_042066.10	8.33732e-22	8.53741e-20	0.686372	0.164198	0.392574	-0.0843955	3.5807e-05	0.000279185	0.371475	0.00383377	0.00950701	-0.0420038	9.49794e-18	1.45888e-14	0.796661	0.0194264	0.0531888	0.252827
MAP3K1_P7_F	Y	MAP3K1	XM_042066.10	1.35012e-22	1.88525e-20	0.594867	0.0679591	0.262274	-0.129999	6.78012e-08	2.26397e-06	0.445605	0.167299	0.229439	0.123261	4.20431e-12	3.58768e-10	0.702265	0.0233942	0.0623846	0.203433
MAP3K8_P1036_F	Y	MAP3K8	NM_005204.2	6.50357e-10	9.08135e-09	0.213098	0.0418144	0.20325	-0.158709	0.0622536	0.122278	0.118626	0.00069177	0.00253031	0.187798	1.64654e-05	0.000118736	0.210505	0.837209	0.910402	-0.0144047
MAP3K9_E17_R	Y	MAP3K9	NM_033141.2	0.0783579	0.139411	0.00879597	0.314282	0.535779	0.0295933	0.0191123	0.0456556	-0.0307215	0.26555	0.342246	-0.0212064	0.0656053	0.0957888	-0.112077	0.0132836	0.0385702	-0.114162
MAPK10_E26_F	N	MAPK10	NM_138982.1	0.938052	0.954836	-0.00816859	0.013181	0.0935503	-0.238492	8.39692e-05	0.000548837	-0.19319	0.999376	0.999376	3.22209e-05	9.0794e-05	0.000415058	0.245699	0.00558437	0.0186818	0.19845
MAPK12_E165_R	Y	MAPK12	NM_002969.3	0.332995	0.432359	-0.0030467	0.0739812	0.274845	0.0128929	9.62305e-07	1.71872e-05	-0.023912	0.000259402	0.00128346	-0.0240616	0.00363862	0.00730577	-0.0493063	0.00695372	0.0224861	-0.0428607
MAPK12_P416_F	Y	MAPK12	NM_002969.3	2.18589e-07	1.76592e-06	0.460917	0.789605	0.896403	-0.0116727	0.0674456	0.130074	0.067628	0.00926621	0.0194971	0.214557	0.628775	0.680429	-0.0269476	0.560485	0.711356	0.0431769
MAPK14_P327_R	Y	MAPK14	NM_139013.1	0.11369	0.19211	0.0492165	0.26824	0.494969	-0.0276886	0.187879	0.295376	0.0616184	0.33756	0.422913	-0.020309	0.00655119	0.0121824	-0.102404	0.58218	0.729121	-0.0347907
MAPK4_E273_R	N	MAPK4	NM_002747.2	2.1254e-06	1.40112e-05	-0.393813	0.017408	0.115146	-0.177041	2.12561e-05	0.000189822	-0.260834	0.000200626	0.0010663	-0.215252	0.185855	0.241109	-0.0696862	0.206605	0.354972	-0.0876334
MAPK9_P1175_F	N	MAPK9	NM_139070.1	0.806197	0.861139	0.00195608	0.159674	0.389546	-0.0351233	0.0355309	0.077193	-0.0171308	0.51	0.585471	-0.00990956	0.00641729	0.0119769	0.0847249	0.0163154	0.0459825	0.0924428
MAPK9_P1286_R	N	MAPK9	NM_139070.1	0.263628	0.362193	-0.0770081	0.197733	0.431109	-0.0813704	0.927041	0.946136	0.00794706	0.441602	0.524711	0.0615423	0.179271	0.234349	0.0525731	0.40387	0.583579	-0.0614914
MAS1_P469_R	N	MAS1	NM_002377.2	0.0189383	0.0446839	-0.0936175	0.7073	0.844144	-0.0086273	0.0231364	0.0538448	-0.0961462	0.0889513	0.133167	-0.0989953	0.00058818	0.00163371	0.0828256	0.200286	0.347615	0.0502749
MAS1_P657_R	N	MAS1	NM_002377.2	0.0443096	0.0882744	-0.020688	0.263876	0.493799	-0.0261497	0.426308	0.540718	-0.00845367	0.664407	0.72739	-0.00583822	0.00196048	0.00435788	0.048232	0.686957	0.817325	-0.0218458
MATK_P190_R	Y	MATK	NM_139355.1	5.73773e-09	6.52826e-08	0.398563	0.183489	0.411444	0.108154	0.0033616	0.0106682	0.182458	0.678924	0.739594	0.0305246	0.000403633	0.00127568	0.322166	0.322928	0.500018	-0.0979994
MATK_P64_F	Y	MATK	NM_139355.1	0.948983	0.962773	-0.000350475	0.472816	0.669968	0.00654694	0.00492735	0.0146391	-0.0213844	0.0172975	0.0328011	-0.0245898	0.056677	0.0841933	-0.0200966	0.000161288	0.000851336	-0.0311196
MBD2_P233_F	N	MBD2	NM_003927.3	0.0724662	0.131147	0.0878705	0.015784	0.107275	-0.244427	0.498557	0.604102	0.0373048	1.69068e-06	7.01862e-05	0.226157	0.0370876	0.0571379	-0.162409	0.414945	0.593994	0.0680023
MC2R_E455_F	N	MC2R	NM_000529.2	0.0472753	0.0927392	-0.0942134	0.290355	0.509908	-0.0333967	0.0132487	0.0335808	0.186329	0.247677	0.322235	0.109584	0.00264698	0.00556335	0.0517738	4.72246e-05	0.000293672	0.0538781
MC2R_P1025_F	N	MC2R	NM_000529.2	0.00381295	0.0114837	0.194176	0.35986	0.577581	0.0758973	6.83859e-05	0.000470784	-0.15095	0.0181547	0.0341736	-0.163099	0.847502	0.870745	-0.0188135	0.11281	0.219614	-0.115575
MC2R_P6_R	N	MC2R	NM_000529.2	0.316691	0.41647	-0.0305688	1.51194e-05	0.000464468	-0.34336	0.0752532	0.141588	0.109879	0.0290601	0.0511298	0.124839	0.151754	0.201464	-0.0925821	0.89641	0.939853	-0.0056857
MCAM_P169_R	Y	MCAM	NM_006500.2	0.391884	0.487654	0.017537	0.409938	0.621583	0.00742952	0.0483742	0.100138	0.100668	0.00232179	0.00632318	-0.0260752	0.000518678	0.00152622	-0.0538923	3.44059e-06	3.91463e-05	-0.0525403
MCAM_P265_R	Y	MCAM	NM_006500.2	0.959248	0.968708	-0.00121703	0.686779	0.832591	-0.00729361	0.388901	0.503669	0.0557982	0.0189082	0.0353752	-0.0635525	0.00322809	0.00661995	-0.078832	0.0135655	0.0391665	-0.0574531
MCC_E23_R	Y	MCC	NM_002387.1	0.67798	0.749732	-0.00165116	0.208956	0.439666	-0.00510034	0.00144407	0.00529378	-0.0277082	0.0036428	0.0091278	-0.0356999	0.00055627	0.00157644	-0.0506612	1.26597e-05	0.000102126	-0.0473223
MCC_P196_R	Y	MCC	NM_002387.1	0.477115	0.564598	0.00128113	0.0568544	0.235864	0.00511818	2.77072e-05	0.000232295	-0.0148335	0.00023548	0.00118979	-0.018404	0.000214045	0.000792225	-0.025968	4.37141e-06	4.63068e-05	-0.0248025
MCF2_E195_F	N	MCF2	NM_005369.2	0.00640347	0.017754	-0.208877	0.0340886	0.181332	-0.181887	0.00463367	0.0139555	-0.183719	0.0884036	0.132605	-0.131998	0.00118923	0.00289946	-0.224898	0.0452391	0.105284	0.194187
MCF2_P1024_R	N	MCF2	NM_005369.2	0.171451	0.262038	-0.0199044	0.0722994	0.27362	-0.132978	0.141378	0.237102	0.067639	0.439574	0.5234	-0.0584333	0.000160289	0.000637833	0.309934	0.0445235	0.103904	0.179763
MCF2_P445_F	N	MCF2	NM_005369.2	0.0588903	0.110717	-0.0788318	0.0110233	0.0838211	-0.226966	0.0970388	0.175149	-0.0484255	0.0184985	0.0347781	-0.0907076	0.000205719	0.000772576	0.322246	0.0289678	0.0740342	0.182415
MCM2_P241_R	Y	MCM2	NM_004526.2	0.401108	0.496056	0.00195357	0.326089	0.547402	0.00273485	0.425991	0.540718	0.0144721	0.0151844	0.029523	-0.00860589	0.972908	0.976724	-0.000686117	3.83401e-05	0.000249043	-0.0307782
MCM2_P260_F	Y	MCM2	NM_004526.2	0.0625436	0.116823	-0.0168394	0.219205	0.444919	-0.0169486	0.889309	0.917996	0.00539443	0.00436223	0.0106524	-0.0520744	0.777402	0.815066	-0.0129589	5.18514e-08	1.76096e-06	-0.0987485
MCM6_E136_F	Y	MCM6	NM_005915.4	0.734038	0.799067	-0.00150275	0.585041	0.751357	-0.00212392	9.56281e-07	1.71872e-05	-0.0324302	0.000157717	0.000914165	-0.0356156	0.000418642	0.00129909	-0.0624493	2.59815e-06	3.19644e-05	-0.0617797
MDR1_seq_42_S300_R	Y	.	.	0.0020768	0.00683075	0.359152	0.0387175	0.195494	-0.0301725	0.0015211	0.00553653	-0.0186288	0.000433136	0.00184293	-0.0279829	0.0327404	0.051211	-0.043295	0.248039	0.408785	0.0718159
MDS1_E45_F	Y	MDS1	NM_004991.1	0.000495942	0.00195827	-0.0642135	0.000808299	0.0129328	-0.0572151	0.00992948	0.0263414	-0.029087	0.0193926	0.0360181	-0.034812	3.26837e-05	0.000197646	-0.0706067	0.82617	0.904488	-0.0121066
MECP2_E90_R	Y	MECP2	NM_004992.2	0.519476	0.604024	-0.0407199	0.343392	0.565328	-0.0629287	0.0837988	0.154706	-0.0820809	0.158357	0.219726	-0.0907449	0.000715836	0.00192192	-0.132471	0.142003	0.264064	0.136265
MECP2_P398_R	Y	MECP2	NM_004992.2	0.161198	0.251115	-0.132668	0.0325658	0.178647	-0.181107	0.575775	0.666961	-0.0434501	0.500955	0.577678	-0.0654859	0.0332347	0.0519215	-0.0732244	0.373204	0.553033	0.0535016
MEG3_E91_F	Y	MEG3	XR_001355.1	0.145815	0.231616	-0.094325	0.0648728	0.252265	0.152869	0.0237288	0.0549961	-0.103958	0.0144462	0.0282668	-0.127872	0.312673	0.380258	-0.0987884	0.286958	0.459132	-0.061805
MEG3_P235_F	Y	MEG3	XR_001355.1	0.304879	0.40545	-0.0650369	0.921387	0.961048	-0.00771088	0.226001	0.340192	-0.047139	0.000557376	0.00221472	-0.140783	0.066015	0.0962954	-0.198746	0.0378322	0.0918014	-0.118374
MEST_E150_F	Y	MEST	NM_002402.2	7.55907e-10	1.0275e-08	0.356192	0.00606645	0.057166	0.267011	9.35164e-10	1.79551e-07	0.401806	0.0165911	0.0316965	0.201791	1.98207e-08	5.63789e-07	0.493927	0.0111489	0.0336437	0.182579
MEST_P4_F	Y	MEST	NM_002402.2	3.06626e-10	4.3609e-09	0.297713	0.0425998	0.204553	0.179797	3.34842e-13	5.14317e-10	0.442493	0.0565949	0.090741	0.172685	6.61173e-09	2.11575e-07	0.584385	8.79649e-06	7.90141e-05	0.42645
MEST_P62_R	Y	MEST	NM_002402.2	1.93013e-09	2.39088e-08	0.281525	0.0284333	0.161754	0.194539	1.65176e-10	5.0742e-08	0.404858	0.0308218	0.0539821	0.206724	4.80534e-10	2.46033e-08	0.49894	4.67765e-07	9.57983e-06	0.34709
MET_E333_F	Y	MET	NM_000245.2	1.3642e-09	1.79095e-08	0.428374	0.174419	0.403823	-0.113163	0.857454	0.895342	0.013571	6.14641e-05	0.00051873	-0.200952	0.000372471	0.00118943	0.365392	0.0813496	0.167722	0.175117
MFAP4_P10_R	N	MFAP4	NM_002404.1	0.423634	0.517662	-0.0126099	0.164339	0.392574	-0.0323432	0.0664735	0.129081	0.119049	7.88416e-05	0.000593631	-0.213062	0.000818837	0.0021463	-0.141003	0.156021	0.283273	-0.077033
MFAP4_P197_F	N	MFAP4	NM_002404.1	0.030957	0.0663332	-0.0804737	0.008579	0.0735749	-0.101899	0.549844	0.646183	-0.0340427	1.22467e-05	0.00019801	-0.340179	1.95727e-06	2.24356e-05	-0.133408	0.147997	0.27257	-0.0502508
MGMT_P272_R	Y	MGMT	NM_002412.2	0.209836	0.303778	0.0203942	0.473646	0.670526	0.00282819	0.0560471	0.112387	-0.0159418	4.26209e-06	0.000101331	-0.0354984	0.00258905	0.0055081	0.188568	0.237899	0.396756	-0.0312075
MGMT_P281_F	Y	MGMT	NM_002412.2	0.225505	0.321015	0.0490234	0.152888	0.387543	0.00743225	0.702564	0.77413	0.00623107	0.00137112	0.00421209	-0.0205949	0.000654472	0.00179247	0.421321	0.286266	0.458503	0.0877792
MKRN3_E144_F	Y	MKRN3	NM_005664.2	0.0333095	0.0706676	-0.0133878	0.150172	0.387021	-0.109074	0.0740673	0.139935	-0.0441293	7.29008e-05	0.000565534	-0.315003	3.90294e-08	9.66921e-07	-0.544645	0.221922	0.374997	-0.116989
MKRN3_P108_F	N	MKRN3	NM_005664.2	0.00624278	0.0174661	-0.0530731	0.243642	0.473116	-0.0386369	0.0607771	0.120146	-0.0487663	0.000152279	0.00089617	-0.173197	1.35281e-06	1.71728e-05	-0.437075	0.312519	0.488828	-0.104434
MKRN4_E249_R	Y	.	.	0.0258894	0.0573827	-0.0561442	0.0989128	0.320527	-0.0345176	0.219797	0.333525	0.00835183	0.0851276	0.129078	0.0179556	0.0419803	0.0640972	0.0497061	0.00337558	0.0122753	0.0561004
MKRN4_P1320_R	Y	.	.	0.00649287	0.0179327	-0.0974541	0.125996	0.361804	-0.0656533	0.0237385	0.0549961	-0.0504435	0.0778032	0.118911	-0.0492027	0.000578919	0.00162266	0.0777871	0.948995	0.964356	-0.0041907
MLF1_E243_F	Y	MLF1	NM_022443.2	0.0999577	0.172124	-0.0152815	0.170259	0.400487	-0.01263	7.89296e-06	8.84933e-05	-0.0516562	0.00478873	0.0115471	-0.0484004	0.00134355	0.00319457	-0.0564681	9.5849e-06	8.14601e-05	-0.0590806
MLF1_P97_F	Y	MLF1	NM_022443.2	0.828926	0.879302	0.000898592	0.142369	0.382999	-0.00480535	0.00231468	0.00786581	-0.0130711	0.00518225	0.0123041	-0.01556	1.26192e-05	9.74819e-05	-0.0495801	4.79178e-08	1.68726e-06	-0.0463949
MLH1_P381_F	Y	EPM2AIP1	NM_014805.2	0.437103	0.531813	0.00268048	0.749526	0.872837	-0.000896079	0.000168315	0.00092997	-0.0123389	0.000208154	0.0010875	-0.0157973	9.65221e-06	8.02793e-05	-0.0498715	8.29855e-09	4.90253e-07	-0.0517453
MLH3_E72_F	Y	MLH3	NM_014381.1	0.000537657	0.00209604	0.431965	0.0626072	0.248487	-0.0216772	0.191682	0.299516	-0.014283	0.000908824	0.00312294	-0.0284934	0.389051	0.454781	0.0726173	0.934528	0.959278	0.00458974
MLH3_P25_F	Y	MLH3	NM_014381.1	0.00049328	0.00195827	0.344377	0.566833	0.736596	-0.00490623	0.694484	0.767982	0.00467477	0.00182271	0.00527246	-0.0127594	0.509292	0.56934	0.0266252	5.43885e-06	5.35517e-05	-0.0252757
MLLT3_E93_R	Y	MLLT3	NM_004529.1	0.673644	0.747628	0.000873417	0.0957523	0.314329	0.00498009	0.219665	0.333525	-0.00274702	0.00264465	0.00695115	-0.00746216	3.28802e-05	0.000198055	-0.0352124	1.2666e-07	3.24249e-06	-0.0340072
MLLT4_P1400_F	Y	MLLT4	NM_005936.1	6.70707e-18	2.45287e-16	0.702968	0.0495302	0.219323	-0.0398204	0.240831	0.356987	0.0645587	0.828961	0.869729	-0.00336256	0.000460652	0.00139375	-0.0654726	0.943612	0.961133	-0.00340479
MLLT6_P957_F	Y	MLLT6	NM_005937.2	0.0569475	0.107989	0.154471	0.986879	0.992696	0.000475587	0.000159198	0.000882771	-0.0487244	0.00026892	0.00129893	-0.0616111	0.342926	0.41213	-0.0241763	0.00278364	0.010454	-0.0546361
MME_E29_F	Y	MME	NM_000902.2	0.135111	0.219377	0.127326	0.875326	0.938897	-0.00293564	0.000243376	0.00123375	-0.0538827	0.000598838	0.00232276	-0.0711142	0.183226	0.238424	-0.049789	0.96414	0.973648	-0.00214988
MME_P388_F	Y	MME	NM_000902.2	0.00188356	0.00631691	0.33286	0.782465	0.892254	0.0104495	0.657406	0.73868	-0.0107243	0.0429438	0.0723265	-0.051298	0.0018362	0.00411199	-0.0539088	0.216469	0.368213	0.060461
MMP10_E136_R	N	MMP10	NM_002425.1	2.31703e-05	0.000124876	0.153047	0.986146	0.992696	0.00120935	0.0128892	0.0328868	-0.134192	0.106692	0.156972	-0.112733	0.0376136	0.0578902	0.225616	0.200832	0.347784	0.0969392
MMP14_P13_F	Y	MMP14	NM_004995.2	0.177766	0.270345	-0.0657834	0.422369	0.631703	0.0499783	0.000361261	0.00172531	0.302013	0.0318771	0.0553883	-0.109388	1.04359e-05	8.48127e-05	0.347059	0.0496963	0.113087	-0.172851
MMP14_P208_R	N	MMP14	NM_004995.2	0.344782	0.44022	-0.0251545	0.80837	0.909638	-0.00859149	0.155977	0.2556	0.0919856	0.730683	0.784798	-0.0179178	1.81864e-05	0.000128729	0.396893	0.582442	0.729121	0.0518468
MMP19_E274_R	N	MMP19	XM_938761.1	1.42843e-06	9.97305e-06	-0.323875	0.0019881	0.0254477	-0.226288	0.000878464	0.00351386	-0.152637	0.000872891	0.00302655	-0.178682	0.253291	0.315535	-0.0613781	0.639449	0.77944	0.0139705
MMP19_P306_F	N	MMP19	XM_938761.1	1.31673e-05	7.51859e-05	-0.346872	0.0129248	0.0927687	-0.200758	0.00741348	0.0203705	-0.172402	0.00177128	0.00514308	-0.149983	0.0921808	0.128368	-0.151214	0.259316	0.423733	-0.103807
MMP1_P397_R	N	MMP1	NM_002421.2	0.532353	0.616198	-0.00238666	0.148631	0.386103	-0.0200942	0.141397	0.237102	-0.0410037	0.0646862	0.101593	-0.0832627	0.00267557	0.00560664	0.0379411	0.000932305	0.00394904	0.0326089
MMP1_P460_F	N	MMP1	NM_002421.2	0.235116	0.330713	-0.00591834	0.159996	0.389546	-0.027329	0.0358073	0.0775443	-0.0609262	0.0109282	0.0221156	-0.106791	8.82277e-07	1.23198e-05	0.124873	0.197961	0.344748	0.0708942
MMP2_E21_R	Y	MMP2	NM_004530.2	0.000811028	0.00302364	0.224496	0.400481	0.615138	-0.0102215	0.303413	0.425441	0.0218323	0.000558004	0.00221472	-0.045453	0.106441	0.147027	-0.0220417	0.286127	0.458503	-0.0164107
MMP2_P197_F	Y	MMP2	NM_004530.2	0.00148177	0.00517346	0.280384	4.48228e-08	3.62357e-06	-0.164	0.00183124	0.00645135	0.237633	0.108524	0.159059	0.103155	0.47514	0.537024	-0.0342298	0.595063	0.737705	-0.0231595
MMP2_P303_R	Y	MMP2	NM_004530.2	0.00365316	0.0112013	0.216107	3.84058e-09	4.91594e-07	-0.404757	0.00148968	0.00544797	0.226714	0.165705	0.228067	0.0853801	0.508343	0.568692	-0.0596255	0.875836	0.92673	0.013401
MMP3_P16_R	N	MMP3	NM_002422.3	0.00375239	0.0113906	0.0450819	0.1381	0.378114	-0.137894	0.0546262	0.110402	-0.110174	0.00536163	0.0126311	-0.269854	0.444946	0.506625	-0.0398102	0.0903589	0.182861	-0.0953202
MMP3_P55_F	N	MMP3	NM_002422.3	0.0406456	0.0828006	0.0268615	0.14323	0.382999	-0.110835	0.672638	0.748676	-0.0115468	0.142448	0.201288	-0.0747196	7.83244e-05	0.000375895	0.188998	0.045335	0.105347	0.121165
MMP7_E59_F	N	MMP7	NM_002423.3	0.469557	0.560404	0.0323905	0.130416	0.366886	0.0703929	0.269159	0.389659	-0.0446023	0.0758476	0.116619	0.085374	0.0603029	0.0888918	0.0952347	0.735563	0.850771	0.0154051
MMP7_P613_F	N	MMP7	NM_002423.3	0.0367511	0.0765568	-0.12327	0.0341347	0.181332	-0.115928	0.353167	0.467642	0.0192708	0.0574107	0.0918571	-0.124306	0.00246161	0.00528817	0.159567	0.0128065	0.0375396	0.145909
MMP8_E89_R	N	MMP8	NM_002424.1	0.938724	0.954887	0.000477592	0.241264	0.470578	-0.0184699	0.00643586	0.0181719	-0.174181	0.00194724	0.00549292	-0.202482	0.233161	0.293073	0.0564976	0.954912	0.968149	-0.00411452
MMP9_E88_R	N	MMP9	NM_004994.2	0.00031694	0.00132648	-0.198744	0.124316	0.361804	-0.0994188	0.135156	0.228382	-0.0505725	0.328283	0.412637	-0.0439005	0.83437	0.860707	-0.0158848	0.65221	0.790059	0.0351714
MMP9_P189_F	N	MMP9	NM_004994.2	0.908947	0.93325	0.00760241	0.0830536	0.293265	-0.150713	0.0207774	0.0489479	-0.121252	0.0396424	0.0672083	-0.170952	0.000432812	0.00133494	0.386323	0.459031	0.629528	0.0627332
MMP9_P237_R	N	MMP9	NM_004994.2	0.937142	0.954582	-0.00114401	0.1027	0.325613	-0.0154464	2.28273e-05	0.000200358	-0.043314	1.4735e-05	0.000224089	-0.0593772	0.00927053	0.0166935	0.15488	0.0714291	0.151123	-0.0411619
MOS_E60_R	Y	MOS	NM_005372.1	0.000213611	0.000926855	0.355849	0.780335	0.891149	-0.00555249	0.312261	0.43055	0.0307916	0.00125076	0.00400242	-0.0585894	0.000128136	0.000540708	0.487485	0.0760685	0.158752	0.168486
MOS_P27_R	Y	MOS	NM_005372.1	2.81522e-05	0.000146583	0.30957	0.822524	0.914133	0.00647164	0.971469	0.979119	0.000667815	0.606789	0.676363	-0.0150031	0.6696	0.719738	-0.028497	0.796455	0.886489	-0.0151699
MOS_P746_F	N	MOS	NM_005372.1	0.0298014	0.0645627	-0.144073	0.0988619	0.320527	-0.133136	0.0151152	0.0375073	0.092944	0.0619317	0.0981705	-0.10934	0.00749782	0.0137594	0.161188	0.727835	0.84374	-0.028559
MPL_P62_F	N	MPL	NM_005373.1	0.0134127	0.0337183	-0.113879	0.140706	0.381768	-0.0816933	0.139293	0.234599	-0.0658772	0.767394	0.818554	-0.0121924	0.44162	0.504333	-0.0598481	0.769227	0.868774	-0.017826
MPL_P657_F	N	MPL	NM_005373.1	0.00012727	0.000587046	-0.24628	0.00578014	0.0554894	-0.224339	0.00134114	0.00495188	-0.204692	0.00264438	0.00695115	-0.209695	0.00571951	0.0107926	-0.206201	0.320694	0.498065	-0.0926776
MPO_E302_R	N	MPO	NM_000250.1	1.80303e-07	1.48099e-06	-0.433669	0.711988	0.846318	-0.00833865	0.0253104	0.0575998	-0.130507	0.214384	0.28363	-0.02372	0.00163084	0.00373183	-0.306208	0.167648	0.300826	-0.0525462
MPO_P883_R	N	MPO	NM_000250.1	2.23758e-11	3.77684e-10	-0.274281	0.0394817	0.196477	-0.130959	3.41627e-07	7.83192e-06	-0.196073	0.123233	0.1774	-0.103024	0.00949897	0.0170648	-0.246974	0.00167175	0.00656021	-0.231817
MSH2_P1008_F	Y	MSH2	NM_000251.1	0.412677	0.506416	0.0424446	0.232507	0.460764	-0.0860791	3.08216e-06	4.13433e-05	0.119274	0.000448139	0.00188071	0.115813	1.90355e-06	2.23194e-05	0.269327	0.0158414	0.044811	0.180327
MSH3_E3_F	Y	MSH3	NM_002439.2	0.110007	0.186217	-0.0859064	0.158853	0.389546	-0.0893428	0.224981	0.339393	0.104817	0.826583	0.867827	0.0307807	0.465047	0.526391	-0.0320908	0.251513	0.413181	-0.0607051
MSH3_P13_R	Y	MSH3	NM_002439.2	0.0769655	0.137304	-0.0929962	0.123364	0.361616	-0.0974477	0.920905	0.941751	0.00759262	0.979257	0.984384	-0.00317158	0.000238146	0.000842287	-0.199712	0.00027362	0.00133423	-0.180115
MSSK1_seq_27_S45_F	N	.	.	0.0397338	0.0812665	-0.0399123	0.290903	0.509908	-0.0609811	0.4511	0.563325	-0.0145617	0.195561	0.263031	0.0175831	5.23244e-08	1.25579e-06	0.502254	4.24633e-05	0.000269126	0.417269
MST1R_E42_R	Y	MST1R	NM_002447.1	1.04462e-07	9.43845e-07	0.201953	0.0232629	0.139578	-0.236237	0.374705	0.488165	-0.0162153	0.0467458	0.077206	0.0380624	8.07523e-09	2.43207e-07	0.227804	0.0022201	0.00850393	0.160846
MST1R_P392_F	Y	MST1R	NM_002447.1	4.69278e-12	8.79037e-11	0.468597	0.00048587	0.00857813	-0.206381	0.00388493	0.0120065	0.150009	0.0320652	0.0555894	-0.130804	5.79666e-08	1.36217e-06	0.297862	0.831908	0.906858	-0.0162953
MST1R_P87_R	Y	MST1R	NM_002447.1	3.36684e-05	0.000170676	0.22071	6.02416e-05	0.00158451	-0.302894	1.4201e-05	0.000137187	-0.196081	0.640666	0.704916	-0.0258165	3.02053e-08	7.86361e-07	0.237393	1.92708e-06	2.57391e-05	0.17299
MT1A_E13_R	Y	MT1A	NM_005946.2	0.18702	0.27971	0.0427575	0.98428	0.99203	-0.000294035	0.0028178	0.00918925	-0.16612	2.47573e-07	2.2369e-05	-0.321619	9.16805e-06	7.69515e-05	0.508556	0.130587	0.246098	0.133298
MT1A_P49_R	Y	MT1A	NM_005946.2	0.221875	0.317615	0.0480828	0.438534	0.639684	0.00598515	1.48327e-06	2.34876e-05	-0.107538	0.000207564	0.0010875	-0.117429	0.00390599	0.00777151	0.307037	0.416412	0.594985	0.0569699
MT1A_P600_F	Y	MT1A	NM_005946.2	0.0341691	0.0721923	-0.161844	0.0208747	0.128254	-0.205258	0.000731232	0.00304011	-0.198978	0.000513266	0.00209675	-0.324726	0.0125811	0.0218604	0.137285	0.0583203	0.128522	0.0922345
MTA1_P478_F	Y	MTA1	NM_004689.2	0.437768	0.531972	-0.00749347	0.939328	0.965735	0.000925714	2.32905e-05	0.000202114	-0.0537778	0.00019392	0.00105229	-0.0630383	0.000962107	0.0024589	-0.0833487	0.0022829	0.00870108	-0.0705007
MUC1_E18_R	N	MUC1	NM_002456.4	0.67261	0.74702	-0.0214897	0.0501306	0.220002	0.0581802	1.24259e-07	3.67042e-06	0.120911	0.108023	0.158474	0.0778802	0.000223573	0.000809924	0.176025	0.00030312	0.00146874	0.153691
MUC1_P191_F	Y	MUC1	NM_002456.4	8.8605e-17	2.77749e-15	0.517384	0.313725	0.535779	-0.0709279	6.04981e-12	4.64626e-09	0.402622	0.875653	0.910631	0.0106911	0.085272	0.120163	0.177655	0.182539	0.320068	0.0846093
MUSK_P308_F	N	MUSK	NM_005592.1	0.267341	0.366313	-0.0319018	0.705594	0.843418	-0.0182234	4.44719e-05	0.000329994	0.050721	0.0414619	0.069984	0.0484607	0.593377	0.649165	-0.0478364	0.797431	0.886589	0.0176967
MXI1_P1269_F	Y	MXI1	NM_005962.4	0.459735	0.552114	0.0421134	0.331299	0.552449	-0.0894806	0.01206	0.0310808	-0.163755	0.509498	0.585332	0.0404464	0.00804979	0.0146499	0.275871	0.294663	0.468532	0.0943748
MXI1_P75_R	Y	MXI1	NM_005962.4	0.31182	0.412182	0.00621801	0.072935	0.273907	-0.0095194	0.000178385	0.000978571	-0.021355	6.81762e-05	0.000548265	-0.0325774	0.19748	0.253832	-0.0148985	0.0169973	0.0476422	-0.0208161
MYBL2_P211_F	Y	MYBL2	NM_002466.2	0.148483	0.235123	0.0289615	0.464799	0.663451	0.00482948	0.349726	0.46509	0.0413424	0.00265194	0.00695115	-0.0148799	0.455987	0.517662	-0.00743325	0.707565	0.829633	0.0141064
MYBL2_P354_F	Y	MYBL2	NM_002466.2	2.81273e-06	1.80015e-05	0.46244	0.791869	0.897988	-0.0121473	0.000848372	0.00342021	0.220466	0.116029	0.168451	0.0864491	0.383811	0.451404	0.0437364	0.417597	0.595158	0.043994
MYB_P673_R	Y	MYB	NM_005375.2	7.64136e-22	8.38366e-20	0.705803	0.211797	0.442614	-0.0469076	0.0137105	0.0344655	0.139907	0.617545	0.684379	-0.0188998	0.000330569	0.00108494	-0.0929765	9.3407e-07	1.57663e-05	-0.104025
MYCL1_P502_R	Y	MYCL1	NM_001033081.1	0.0369299	0.0766545	0.145072	0.533197	0.714029	0.0207	0.00176598	0.00629362	-0.0277992	0.00403794	0.00993955	-0.0387263	0.00285338	0.00593875	0.312988	0.49935	0.662351	0.0428399
MYCL2_E44_R	Y	.	.	0.0131829	0.033359	-0.156292	0.31017	0.532323	-0.0768455	0.100493	0.179277	-0.0566815	0.838353	0.877785	-0.0113951	0.182817	0.238174	0.108459	0.0619676	0.134628	0.140939
MYCL2_P19_F	Y	.	.	0.335679	0.433644	-0.080734	0.21594	0.443615	-0.0873773	0.923861	0.944145	-0.00581933	0.363514	0.450651	0.0845964	0.000252484	0.000879401	0.468501	0.00528064	0.0178265	0.267679
MYCN_E77_R	Y	MYCN	NM_005378.4	0.00061395	0.00235169	0.323905	0.00357107	0.0386279	-0.017598	0.000733162	0.00304011	-0.013238	0.000973053	0.00328486	-0.0164589	0.00015826	0.000634691	-0.0324449	0.0192763	0.0529668	-0.024388
MYCN_P464_R	Y	MYCN	NM_005378.4	0.0070671	0.0193146	0.239627	0.528727	0.712207	-0.00347113	0.173263	0.279551	-0.0030851	0.617335	0.684379	-0.00191009	4.18498e-05	0.000236328	-0.0350502	7.1406e-07	1.37099e-05	-0.0319252
MYH11_P22_F	Y	MYH11	NM_022844.1	0.00654781	0.0180241	0.263336	0.968839	0.980346	0.000336046	0.793671	0.84307	-0.00793117	0.00288235	0.00747853	-0.0431446	0.00209411	0.00462149	-0.041404	0.498342	0.661584	-0.0116139
MYH11_P236_R	Y	MYH11	NM_022844.1	0.0171317	0.0411161	0.217378	0.0480362	0.218295	-0.0160905	0.273457	0.394025	-0.0107389	0.00374031	0.00933801	-0.0244824	0.0532022	0.0793384	-0.0487171	0.0320782	0.0801172	-0.0393201
MYLK_E132_R	Y	MYLK	NM_053025.2	0.000415855	0.00170789	0.356944	0.0342358	0.181332	-0.0207693	0.00278113	0.00910836	-0.0474557	0.00835414	0.0179427	-0.0609337	0.000614414	0.00170043	-0.0782891	2.60127e-06	3.19644e-05	-0.0803153
MYLK_P469_R	Y	MYLK	NM_053025.2	5.01467e-09	5.83525e-08	0.454624	0.823971	0.914133	-0.0112993	0.857452	0.895342	-0.0071909	0.812954	0.858211	0.0153146	0.112934	0.154743	0.0788206	0.409495	0.588937	-0.0255139
MYOD1_E156_F	Y	MYOD1	NM_002478.3	0.474201	0.562884	0.00593942	0.232769	0.460764	0.0153778	0.241118	0.356987	-0.0176105	0.00457593	0.0111037	-0.049929	0.388607	0.454781	0.0268446	0.0247391	0.0652908	0.113682
MYOD1_P50_F	Y	MYOD1	NM_002478.3	0.899631	0.931154	-0.00431957	0.232799	0.460764	-0.0212641	0.77808	0.832844	0.0107239	0.0116996	0.0233992	-0.0616338	0.0548063	0.0815721	-0.0466181	0.00246615	0.00930714	-0.0666202
NAT2_P11_F	N	NAT2	NM_000015.1	0.188585	0.281503	-0.0864868	0.0212499	0.129523	-0.194974	8.68986e-05	0.000561627	-0.219189	0.00680262	0.0150777	-0.185405	0.344536	0.413179	0.046243	0.867917	0.926421	-0.00875915
NBL1_E205_R	N	NBL1	NM_005380.3	0.602408	0.681369	-0.0336476	8.67587e-06	0.000289699	-0.391723	0.0567428	0.113044	0.0780872	0.781936	0.831179	-0.0183195	2.65678e-05	0.000167934	0.147517	0.671518	0.802956	0.0192181
NBL1_P24_F	N	NBL1	NM_005380.3	0.302181	0.402908	0.0520012	0.041285	0.201955	-0.19563	0.0445887	0.0930547	-0.0638968	0.0229965	0.0417939	-0.137123	0.0685045	0.0995486	0.102491	0.965745	0.974628	0.00352213
NCL_P1102_F	Y	NCL	NM_005381.2	0.610783	0.689826	-0.00458499	0.072728	0.2738	-0.0981677	0.870725	0.903061	0.00223351	0.164639	0.227211	0.0148253	9.32183e-08	1.95714e-06	0.234014	1.31032e-10	2.51581e-08	0.214788
NCL_P840_R	Y	NCL	NM_005381.2	0.411693	0.506294	-0.00400544	0.835406	0.919186	0.00136046	0.100067	0.178884	-0.0108721	3.91743e-05	0.000407156	-0.0252688	0.0358731	0.0556015	0.0850132	0.129611	0.244874	-0.0176821
NDN_E131_R	Y	NDN	NM_002487.2	0.039819	0.0813323	-0.112758	0.558626	0.729015	-0.0294383	0.002015	0.00701677	-0.133042	1.02495e-06	5.332e-05	-0.31527	0.870467	0.888988	-0.00748787	0.540484	0.697633	-0.0422454
NDN_P1110_F	N	NDN	NM_002487.2	0.0289788	0.0633759	-0.0409395	0.076664	0.279946	-0.0802015	0.000814049	0.00329915	-0.0962058	0.352527	0.437737	-0.0164909	0.355263	0.424657	0.028034	0.7977	0.886589	-0.0171324
NEFL_E23_R	Y	NEFL	NM_006158.1	0.00718238	0.0194228	-0.170389	0.501698	0.690509	0.068141	0.948503	0.961017	-0.00448789	0.182706	0.248131	0.128883	0.00106846	0.00265559	-0.380783	0.0507358	0.114772	-0.208139
NEFL_P209_R	Y	NEFL	NM_006158.1	0.904886	0.931994	-0.00241066	0.419814	0.629721	0.0245909	0.0353324	0.0768705	-0.0362437	0.0069706	0.0154055	-0.0619044	0.844196	0.867928	-0.00947995	0.104823	0.206705	0.162516
NEO1_P1067_F	Y	NEO1	NM_002499.1	0.094373	0.163793	0.154853	0.226312	0.453214	-0.0228101	0.0535346	0.108482	-0.029634	0.000180026	0.00100189	-0.051701	0.0184412	0.030722	-0.0259596	0.656617	0.79352	-0.00681661
NES_P239_R	N	NES	NM_006617.1	0.821369	0.872491	0.0193323	7.46855e-09	7.64779e-07	-0.150674	0.206669	0.31808	0.0986124	0.000195048	0.00105229	-0.108951	0.434483	0.497663	-0.0288876	0.979986	0.985753	-0.00140257
NEU1_P745_F	Y	NEU1	NM_000434.2	0.00240644	0.00783114	-0.135346	0.00245734	0.0304393	-0.126723	1.01063e-06	1.78429e-05	-0.108616	0.000345219	0.00155958	-0.115733	0.407204	0.471693	-0.0299865	0.00859491	0.0268329	-0.051984
NFKB1_P336_R	Y	NFKB1	NM_003998.2	0.309689	0.410779	0.0265622	0.748797	0.872649	0.00706422	0.221902	0.335804	0.0508453	0.377737	0.463792	0.0466786	0.862333	0.882441	0.00952645	0.0765528	0.159521	-0.0681929
NFKB1_P496_F	Y	NFKB1	NM_003998.2	0.0636276	0.118034	-0.0608083	0.529518	0.712207	-0.0234664	0.00202818	0.00701677	-0.118128	0.0736608	0.113483	-0.0762799	0.191661	0.247596	-0.0533884	0.631145	0.771232	0.036936
NFKB2_P709_R	Y	NFKB2	NM_002502.2	0.289228	0.389355	0.0193107	0.419412	0.629721	-0.00814621	0.276076	0.397425	0.084006	0.0437028	0.0733633	-0.055948	7.51122e-06	6.74692e-05	-0.130312	6.39316e-06	6.09931e-05	-0.104832
NGFB_E353_F	Y	NGFB	NM_002506.2	0.311586	0.412182	0.0684544	0.258142	0.490725	-0.0111651	0.0646153	0.126593	-0.0246766	0.00213923	0.00594188	-0.0408439	0.00259515	0.0055081	-0.0363578	0.361998	0.543668	-0.0164747
NGFB_P13_F	Y	NGFB	NM_002506.2	0.245415	0.341756	0.0920761	0.824599	0.914133	-0.00343754	0.842085	0.881693	0.00580536	0.0105415	0.0215031	-0.0500312	3.67682e-05	0.000214463	-0.158194	3.18102e-08	1.35724e-06	-0.160732
NGFR_E328_F	Y	NGFR	NM_002507.1	0.838813	0.886729	-0.00549756	0.92987	0.961389	0.00313978	1.94395e-08	9.95302e-07	-0.0843471	3.19377e-06	8.99647e-05	-0.0922912	0.00238943	0.00516924	-0.0597149	0.554856	0.707857	-0.017732
NGFR_P355_F	Y	NGFR	NM_002507.1	4.43028e-07	3.40245e-06	0.356611	0.615484	0.774905	-0.0356525	0.0102611	0.0271275	0.200587	0.289075	0.368787	-0.0593077	0.00122468	0.00297172	0.250803	0.748111	0.858818	-0.0222688
NID1_E20_F	N	NID1	NM_002508.1	0.214069	0.308163	-0.0692149	0.432424	0.635947	-0.0234097	0.45423	0.565395	0.00632498	0.246285	0.32086	-0.0399973	0.00571206	0.0107926	0.236291	0.00035034	0.0016545	0.233037
NID1_P677_F	N	NID1	NM_002508.1	0.00271842	0.00869894	-0.201509	0.190953	0.422756	-0.0617715	0.0041173	0.0126231	-0.243204	0.000493138	0.00204167	-0.269625	0.132406	0.178557	0.0471199	7.73909e-05	0.000450274	0.0787292
NID1_P714_R	N	NID1	NM_002508.1	0.0051759	0.0149493	-0.0862713	0.238281	0.466835	-0.0226904	0.721163	0.789012	-0.0119507	0.0863023	0.130473	-0.0875124	0.953871	0.958865	-0.00253096	0.0579786	0.128137	0.066999
NKX3-1_P146_F	Y	NKX3-1	NM_006167.2	0.302145	0.402908	0.0145948	0.822777	0.914133	-0.00083207	0.000117282	0.000703691	-0.0345879	0.00176858	0.00514308	-0.0381505	0.0124781	0.0217552	-0.0634844	0.0028719	0.0107069	-0.06036
NKX3-1_P871_R	N	NKX3-1	NM_006167.2	0.888072	0.923547	0.00148142	0.182121	0.411444	-0.0338999	0.505321	0.608763	-0.0104295	0.807648	0.853784	0.00202177	0.000213129	0.000791791	0.0932699	0.0443171	0.103661	0.0635406
NNAT_P544_R	Y	NNAT	NM_181689.1	0.0463118	0.0910819	0.0723023	0.57011	0.739602	0.0262876	0.736923	0.801638	-0.00899534	0.0272816	0.0486131	-0.0796431	2.6657e-09	9.98663e-08	0.308752	1.33891e-05	0.000105465	0.214136
NOS2A_E117_R	N	NOS2A	NM_000625.3	0.000133441	0.000604831	-0.28128	0.139641	0.380817	-0.0735078	0.000974595	0.0038384	-0.0557302	0.0642818	0.101061	-0.0609224	0.000716965	0.00192192	0.100082	0.0105089	0.032348	0.0642146
NOS2A_P288_R	N	NOS2A	NM_000625.3	2.84526e-07	2.24119e-06	-0.332686	0.0181956	0.117552	-0.184133	8.83766e-08	2.71493e-06	-0.328262	2.72169e-05	0.000324797	-0.253847	0.0722736	0.104433	-0.201367	0.35075	0.529746	-0.078036
NOS3_P38_F	N	NOS3	NM_000603.3	3.24496e-07	2.54299e-06	-0.324547	0.160428	0.389901	-0.0766928	0.63876	0.722801	-0.0248475	0.129443	0.185125	0.0584804	0.506686	0.567252	-0.031477	0.393583	0.574661	0.0338815
NOTCH1_E452_R	Y	NOTCH1	NM_017617.2	0.205549	0.299548	0.0873336	0.669028	0.816762	-0.00692854	0.163382	0.266123	0.062483	0.000115504	0.000764406	-0.035464	0.0258463	0.041332	-0.0443808	0.129285	0.244558	-0.0327743
NOTCH1_P1198_F	Y	NOTCH1	NM_017617.2	5.8255e-05	0.000284062	0.3453	0.293296	0.510774	0.0142099	0.00102396	0.00400591	0.294464	0.45363	0.535981	0.0427508	0.000667272	0.00181404	-0.0922098	0.000115777	0.000630613	-0.0781596
NOTCH2_P312_R	Y	NOTCH2	NM_024408.2	0.0501704	0.0976701	0.00453661	0.0243969	0.143887	0.0103702	0.121572	0.208642	0.00638855	0.967512	0.975771	-0.000103222	0.00132271	0.00314989	-0.0246918	4.19692e-05	0.000267488	-0.0240991
NOTCH3_E403_F	Y	NOTCH3	NM_000435.1	0.392092	0.487654	-0.0133265	0.582561	0.749403	-0.0112718	2.21819e-05	0.000195813	-0.0864865	0.0314796	0.0548216	-0.0664436	0.00158142	0.00362547	-0.075301	0.875111	0.92673	0.00654802
NOTCH3_P198_R	Y	NOTCH3	NM_000435.1	0.0580837	0.109603	0.173465	0.774866	0.88622	-0.0146931	0.49934	0.604397	0.0438597	0.0604872	0.0960013	-0.1069	2.31403e-07	4.18159e-06	0.612813	0.118214	0.226687	0.134869
NOTCH4_E4_F	N	NOTCH4	NM_004557.3	1.42268e-05	8.06362e-05	-0.277093	0.0207629	0.12808	-0.196129	0.297864	0.419742	-0.080432	0.0195904	0.0362541	-0.212983	0.338644	0.407647	-0.12066	0.0676047	0.144827	-0.152042
NOTCH4_P938_F	N	NOTCH4	NM_004557.3	1.59818e-06	1.10081e-05	-0.352833	0.0172044	0.114896	-0.173368	9.51653e-05	0.000601539	-0.190658	0.00945605	0.0198151	-0.16114	0.290975	0.358123	0.0574686	0.70355	0.828526	0.0200486
NPR2_P1093_F	Y	NPR2	NM_003995.3	9.09174e-08	8.4126e-07	0.270292	0.103948	0.325845	-0.100816	0.555954	0.650757	-0.0216407	0.00184318	0.00531168	-0.240724	0.0727643	0.104945	-0.123837	0.685969	0.817325	0.0280592
NPR2_P618_F	Y	NPR2	NM_003995.3	0.0893767	0.155649	0.114428	0.999141	0.999141	1.5891e-05	0.714291	0.784801	-0.0119405	4.80344e-05	0.000444874	-0.0879694	0.000147992	0.000604563	-0.0438906	0.000712454	0.00311775	-0.0327868
NPY_E31_R	Y	NPY	NM_000905.2	0.193188	0.286149	0.0986007	0.00287514	0.0332046	-0.0751037	0.168544	0.272796	-0.0833502	0.000632991	0.00241859	-0.161609	0.0203058	0.0335014	-0.0947103	0.759293	0.864648	0.0230903
NPY_P295_F	Y	NPY	NM_000905.2	0.00331784	0.0103162	0.342796	0.476626	0.673975	-0.0189675	0.100008	0.178884	0.146175	0.0793872	0.121091	-0.0932439	0.140515	0.188498	0.136619	0.400053	0.579699	0.0527675
NPY_P91_F	Y	NPY	NM_000905.2	0.0559913	0.106703	0.116767	0.402279	0.615812	-0.00588756	0.814275	0.860197	0.0102231	0.0038512	0.00951035	-0.0510432	3.69064e-05	0.000214463	-0.065648	0.00427238	0.0150513	-0.0490372
NQO1_E74_R	Y	NQO1	NM_001025434.1	0.1163	0.195232	0.0802241	0.873627	0.938386	0.00165557	0.897406	0.924491	-0.00423208	5.04604e-06	0.000107649	-0.0419654	0.000224718	0.000812157	-0.037621	0.000107872	0.00059601	-0.0346247
NQO1_P345_R	N	NQO1	NM_001025434.1	2.01817e-06	1.34195e-05	0.39416	0.935257	0.963484	0.00125881	0.148707	0.248277	0.0945402	0.00190916	0.00543049	-0.0384284	0.0106308	0.0188991	-0.0299733	0.0138079	0.0397688	-0.0245731
NR2F6_E375_R	Y	NR2F6	NM_005234.3	0.171334	0.262038	-0.0128007	0.284349	0.506682	-0.00925275	0.00873732	0.0233807	-0.0204953	0.000103406	0.000710549	-0.0366378	0.0517917	0.0776117	0.124635	0.0284366	0.0731636	-0.046749
NRAS_P103_R	Y	NRAS	NM_002524.2	0.190261	0.283179	0.0796161	0.50773	0.696938	0.00473405	0.621627	0.707273	0.0186967	0.000332152	0.00151422	-0.0469324	0.884389	0.901407	-0.00212655	0.900438	0.942789	-0.0019074
NRAS_P12_R	Y	NRAS	NM_002524.2	0.306497	0.407249	0.0479943	0.334724	0.555274	0.0178063	6.79343e-07	1.35516e-05	-0.0624919	2.46766e-06	8.25923e-05	-0.0849714	0.302866	0.370975	-0.0298625	0.668115	0.80137	0.011337
NRG1_E74_F	Y	NRG1	NM_013958.1	0.862505	0.905542	0.000754684	0.295148	0.513417	-0.00356186	0.0290286	0.0642477	-0.0172482	0.00193001	0.00546953	-0.0276818	0.000285873	0.000968396	-0.0390311	0.000139945	0.000746371	-0.0317918
NRG1_P558_R	Y	NRG1	NM_013958.1	2.03876e-05	0.00011184	0.460111	0.0371157	0.191952	-0.0332332	0.0246475	0.0566745	0.141179	0.0160314	0.0309349	-0.0334212	0.0176659	0.0296232	0.265789	0.417695	0.595158	0.0258008
NTRK1_E74_F	N	NTRK1	NM_001007792.1	0.620432	0.699181	0.0673228	0.341933	0.564134	0.11806	0.577157	0.667556	0.0617603	0.848808	0.886315	0.024518	0.240228	0.301216	-0.161013	0.29609	0.47005	-0.124823
NTRK2_P10_F	Y	LOC653648	XM_933004.1	0.201637	0.2948	0.0617028	0.513994	0.701878	-0.00382651	2.86036e-05	0.00023621	-0.0233705	6.068e-06	0.000115564	-0.0362443	0.0281347	0.0444598	-0.0208421	0.031609	0.0791963	-0.019667
NTRK2_P395_R	Y	LOC653648	XM_933004.1	0.000488338	0.00195335	0.402666	0.189486	0.421812	-0.0137574	0.199077	0.308559	-0.0115287	0.000123974	0.000800035	-0.0295198	0.0354319	0.0550844	0.268495	0.751962	0.861951	0.0136282
NTRK3_E131_F	Y	NTRK3	NM_002530.2	0.86856	0.910033	0.000679283	0.411301	0.622972	0.00278452	0.00073952	0.0030535	-0.0112133	0.00819224	0.0176484	-0.0114139	3.62587e-05	0.000213384	-0.0455669	3.01171e-07	6.42498e-06	-0.0425158
NTRK3_P636_R	Y	NTRK3	NM_002530.2	0.73828	0.801979	0.00415841	0.46357	0.662366	0.00938898	0.378971	0.492568	-0.00981833	0.504074	0.580402	-0.0103625	7.8429e-05	0.000375895	-0.0516057	0.0193514	0.0530781	-0.0369075
NTRK3_P752_F	Y	NTRK3	NM_002530.2	0.183386	0.276157	-0.0163723	0.428808	0.634537	-0.0124896	1.16242e-06	1.96206e-05	-0.0555372	0.00344189	0.00868103	-0.0490575	0.0832469	0.117674	-0.0322911	0.00739512	0.0235174	-0.0403003
NTSR1_E109_F	Y	NTSR1	NM_002531.1	0.300975	0.401998	0.0340941	0.336512	0.557586	0.00575185	0.00104915	0.00407975	-0.00943478	0.00128978	0.00407634	-0.0113192	5.91225e-05	0.000304752	-0.0489311	8.5853e-05	0.000492053	-0.0419204
NTSR1_P318_F	Y	NTSR1	NM_002531.1	1.69536e-05	9.43502e-05	0.417539	0.0449991	0.210087	-0.0320565	0.1287	0.219161	-0.0363342	0.00252118	0.00670561	-0.0447421	0.42956	0.493496	0.072567	0.746139	0.858186	0.0169125
OAT_P465_F	Y	OAT	NM_000274.1	0.0293363	0.0639157	0.118806	0.429429	0.634845	-0.00639797	0.576923	0.667556	0.0161782	0.00118827	0.00385061	-0.0526782	5.91252e-05	0.000304752	-0.0993562	0.0169282	0.0475352	-0.0601786
ODC1_P424_F	Y	ODC1	NM_002539.1	0.262228	0.360779	-0.00481581	0.620485	0.778648	0.00357744	0.000293253	0.00144081	-0.037581	4.19835e-05	0.000415217	-0.0533168	0.00624741	0.0117311	-0.0483662	0.0282344	0.0727651	-0.0420907
OGG1_E400_F	Y	OGG1	NM_016828.1	0.94166	0.95724	-0.00322111	0.87261	0.938386	-0.00585666	0.000417543	0.00194938	-0.0854273	0.00494143	0.0118409	-0.0965673	0.00055031	0.00157062	-0.056395	0.657737	0.794249	0.0123806
ONECUT2_E96_F	Y	ONECUT2	NM_004852.1	0.504039	0.590996	0.0160294	0.789259	0.896403	0.00439819	0.000460241	0.00208534	-0.0497461	0.000692196	0.00253031	-0.0615529	3.75914e-05	0.000216256	-0.0991073	0.899313	0.942254	-0.00522084
ONECUT2_P315_R	Y	ONECUT2	NM_004852.1	0.142262	0.227856	-0.00790425	0.804117	0.905733	0.00235583	9.06556e-05	0.000578609	-0.0276202	0.00238391	0.0064353	-0.0305311	0.00140703	0.00330366	-0.0301451	0.984554	0.988976	-0.000421751
OPCML_E219_R	Y	OPCML	NM_002545.3	0.211388	0.304988	0.0722291	0.819265	0.913201	0.00343156	0.0340126	0.074104	-0.012863	0.0325483	0.0562364	-0.0155708	4.42989e-05	0.000248333	-0.0372865	2.21182e-05	0.000161012	-0.0312364
OPCML_P71_F	N	OPCML	NM_002545.3	0.202928	0.296009	0.0739318	0.704555	0.842832	-0.0127567	0.666944	0.744495	0.0117224	0.00986047	0.0204948	-0.0496779	0.371133	0.439183	0.0856945	0.0245856	0.0649973	-0.0547085
OSM_P188_F	Y	OSM	NM_020530.3	0.0225989	0.0512744	-0.0947357	0.111448	0.339793	-0.0458628	0.000293603	0.00144081	0.0722103	0.24567	0.32033	0.0447542	0.000140576	0.000585164	0.139644	0.863301	0.922777	0.00648975
OSM_P34_F	N	OSM	NM_020530.3	0.0377167	0.0779714	-0.153779	0.052964	0.227242	-0.112246	0.0783666	0.146437	0.0367885	0.123185	0.1774	0.0469256	0.557024	0.61492	0.0344882	0.0316579	0.0791963	-0.131467
P2RX7_E323_R	Y	P2RX7	NM_177427.2	0.079241	0.140089	0.0729072	0.369946	0.586863	0.01185	0.000670433	0.00282133	-0.117897	4.84469e-06	0.000105835	-0.148629	4.62468e-05	0.000254606	-0.0574665	0.000114312	0.000627084	-0.041988
P2RX7_P119_R	N	P2RX7	NM_177427.2	4.67572e-05	0.000233179	0.246616	0.934339	0.963185	-0.00206021	0.303968	0.42561	0.0511623	3.64542e-05	0.000397513	-0.105535	0.00167496	0.00381147	-0.0908098	0.00171783	0.00669692	-0.0758555
P2RX7_P597_F	N	P2RX7	NM_177427.2	0.337892	0.435769	0.0113422	0.9438	0.967741	-0.00156764	0.0680299	0.130781	-0.0528047	0.0732455	0.11307	-0.118149	0.107008	0.147677	-0.152937	0.00020162	0.00102208	0.344508
PADI4_E24_F	N	PADI4	NM_012387.1	0.000350164	0.00144196	-0.269709	0.106596	0.32999	-0.0918563	0.124758	0.213158	-0.0442538	0.559814	0.630869	-0.0152731	0.00348565	0.00707056	0.0779001	0.730663	0.846379	0.0125473
PADI4_P1011_R	N	PADI4	NM_012387.1	2.36227e-11	3.94396e-10	-0.491741	1.19223e-08	1.14454e-06	-0.446608	8.69254e-09	7.02723e-07	-0.294858	1.69591e-05	0.000248087	-0.259542	0.000804231	0.00211524	-0.388316	0.354995	0.534956	-0.0731067
PADI4_P1158_R	N	PADI4	NM_012387.1	0.000885818	0.00326287	-0.235667	0.241882	0.470888	-0.107695	0.027567	0.0618144	-0.0987117	0.463835	0.545521	0.0346118	0.74756	0.7899	0.0376093	0.433796	0.608717	0.0712516
PALM2-AKAP2_P183_R	Y	PALM2	NM_053016.3	0.181001	0.274449	-0.0158318	0.162678	0.39122	-0.0169197	1.13594e-06	1.93868e-05	-0.057643	0.000396452	0.0017202	-0.0593303	8.70937e-06	7.39093e-05	-0.110141	0.820922	0.902895	-0.0144675
PALM2-AKAP2_P420_R	Y	PALM2	NM_053016.3	0.153146	0.241511	0.0946398	0.683479	0.829245	0.00553744	0.00367882	0.0114851	-0.0367476	0.000480142	0.00199324	-0.0585153	0.000290197	0.000979654	-0.0690367	0.263801	0.428882	-0.0296235
PARP1_P610_R	Y	PARP1	NM_001618.2	0.577015	0.656029	-0.0257956	0.274044	0.495984	-0.0776047	0.362676	0.476536	0.0471582	0.330076	0.414298	0.06691	0.000217461	0.000799089	0.229782	0.930136	0.959278	0.00776964
PAX6_E129_F	Y	PAX6	NM_001604.3	6.36512e-07	4.74603e-06	0.544373	0.511678	0.700479	0.0363496	0.666319	0.744339	0.0270784	0.523217	0.5993	-0.0239751	8.36809e-05	0.000388429	-0.0552437	3.86046e-05	0.000249043	-0.0508
PAX6_P1121_F	Y	PAX6	NM_001604.3	1.56089e-08	1.64214e-07	0.372587	0.267304	0.494969	0.0729863	0.331693	0.450072	-0.0416468	3.98832e-06	9.88075e-05	-0.157381	3.32773e-05	0.000199664	0.4522	0.522785	0.683402	-0.0399616
PAX6_P50_R	Y	PAX6	NM_001604.3	0.0001311	0.000599316	0.371968	0.481112	0.676728	-0.00910445	0.251349	0.368741	0.0733756	0.643586	0.707116	0.0165983	1.10207e-05	8.86275e-05	-0.0487646	0.0755398	0.157863	-0.0317461
PCDH1_E22_F	Y	PCDH1	NM_032420.2	0.818595	0.870799	0.000647566	0.691586	0.836438	-0.00107632	6.17911e-06	7.30974e-05	-0.0169932	2.91371e-05	0.000341638	-0.021316	5.74326e-05	0.000299815	-0.0314566	3.68828e-06	4.07322e-05	-0.0277583
PCDH1_P264_F	Y	PCDH1	NM_032420.2	0.00024374	0.00104285	-0.0891486	0.00581935	0.0555187	-0.0687582	0.000125099	0.000746204	-0.072393	0.00519079	0.0123041	-0.0756785	0.0345788	0.0538126	-0.0618134	0.000731248	0.00318186	-0.0698389
PCGF4_P760_R	Y	PCGF4	NM_005180.5	0.188342	0.281413	0.101884	0.271653	0.494969	0.015613	0.177695	0.283426	-0.0119165	0.000357153	0.00159681	-0.0347257	0.0194775	0.0322733	-0.0469994	0.000244674	0.00120821	-0.0551107
PCGF4_P92_R	Y	PCGF4	NM_005180.5	0.749589	0.810823	-0.00381106	0.75256	0.87372	0.00628887	0.000425601	0.00196905	-0.0665588	0.0718654	0.111276	-0.0506954	0.0754691	0.108438	-0.0368965	0.00360647	0.0130294	-0.0379019
PCTK1_E77_R	Y	PCTK1	NM_006201.3	0.668351	0.744443	-0.0158564	0.271028	0.494969	0.060772	0.00102495	0.00400591	-0.115765	0.000276531	0.00132321	-0.174244	3.8915e-10	2.13477e-08	-0.536931	9.61743e-10	8.20688e-08	-0.498535
PDE1B_E141_F	Y	PDE1B	NM_000924.2	0.0198317	0.0461538	0.214719	0.145999	0.38334	-0.0151397	0.859798	0.896253	-0.00349513	0.00229064	0.0062829	-0.0351104	0.0010389	0.00260077	-0.0656469	7.27531e-05	0.000427909	-0.0582305
PDE1B_P263_R	Y	PDE1B	NM_000924.2	2.69155e-05	0.000141583	0.508355	0.0390208	0.195869	-0.0188509	0.147589	0.246678	0.0371072	0.00248362	0.00662299	-0.0163884	0.00645355	0.0120299	-0.028191	9.19399e-06	8.14601e-05	-0.0330781
PDGFA_P78_F	Y	PDGFA	XM_926001.1	0.566669	0.647622	-0.0105971	0.00284597	0.0331506	-0.0527784	1.74261e-07	4.77974e-06	-0.118903	0.000649392	0.00244514	-0.107888	6.07587e-05	0.000306991	-0.126205	1.57348e-06	2.28006e-05	-0.116951
PDGFA_P841_R	Y	PDGFA	XM_926001.1	0.181706	0.274975	0.0849516	0.442712	0.643782	0.00189226	0.30815	0.428053	0.0222793	0.00027125	0.00130608	-0.0101487	4.18491e-05	0.000236328	-0.0311088	5.71338e-07	1.11085e-05	-0.0288235
PDGFB_E25_R	Y	PDGFB	NM_002608.1	0.0428744	0.0857488	0.191842	0.28595	0.507181	0.0517839	0.766058	0.825842	0.01101	0.37292	0.459715	-0.0428604	0.000469016	0.00141534	-0.168061	6.31978e-06	6.08497e-05	-0.167635
PDGFB_P719_F	N	PDGFB	NM_002608.1	0.000100428	0.00046887	-0.298608	0.00973174	0.0767013	-0.222685	0.1251	0.213504	0.0362632	0.00994346	0.0205561	-0.255469	0.501644	0.562427	0.0537213	0.701085	0.827086	-0.021928
PDGFRA_E125_F	N	PDGFRA	NM_006206.3	0.114311	0.192722	0.132858	0.00054261	0.00929182	-0.280231	0.0134003	0.0338533	-0.161632	2.0478e-05	0.000273515	-0.263678	0.723707	0.77035	-0.0353337	0.448958	0.621821	0.0624677
PDGFRA_P1429_F	Y	PDGFRA	NM_006206.3	1.58503e-05	8.91795e-05	0.522652	0.000181516	0.00392688	-0.0553135	0.853323	0.892243	0.00598013	0.00201769	0.00563486	-0.0362171	0.00102717	0.00258644	-0.0424655	0.0107862	0.0329375	-0.0324435
PDGFRB_E195_R	N	PDGFRB	NM_002609.3	0.0358831	0.0750906	0.162383	0.90879	0.956097	-0.00196971	0.168169	0.272476	0.0656665	0.118076	0.171098	-0.0592407	3.54318e-05	0.00020932	-0.0647488	2.53278e-06	3.17584e-05	-0.0568569
PDGFRB_P273_F	Y	PDGFRB	NM_002609.3	6.84318e-06	4.07408e-05	0.494273	0.886857	0.941897	-0.00503281	0.00139346	0.00512047	0.244941	0.0313445	0.0546533	-0.0892904	9.70268e-05	0.000431688	-0.142482	0.0130147	0.0378828	-0.0941934
PDGFRB_P343_F	Y	PDGFRB	NM_002609.3	0.000423907	0.0017317	0.301192	0.763166	0.878728	-0.0012957	0.175159	0.281427	0.0977022	0.234399	0.307198	-0.0350679	0.000327165	0.00107607	-0.0362502	3.71633e-06	4.07322e-05	-0.0341374
PECAM1_E32_R	Y	PECAM1	NM_000442.2	0.195042	0.288061	-0.0354333	0.938525	0.965556	0.00214422	0.0752553	0.141588	-0.0678703	0.514239	0.589896	-0.0232689	0.00539799	0.0102998	0.103524	0.643826	0.781752	0.0172121
PECAM1_P135_F	Y	PECAM1	NM_000442.2	0.0106641	0.0275295	-0.126543	0.611548	0.771698	0.0129796	0.000366778	0.0017388	-0.165943	0.00516125	0.0123041	-0.188896	0.988106	0.98875	0.000503207	0.0597728	0.130789	-0.126411
PEG10_P978_R	Y	PEG10	XM_940371.1	9.45363e-05	0.000442707	0.214759	0.0034738	0.0385648	-0.047802	0.00050189	0.002241	-0.0463021	0.00149397	0.00450832	-0.0593126	0.00383011	0.00763298	-0.0709595	0.756033	0.862754	0.0133413
PEG3_E496_F	Y	PEG3	NM_006210.1	0.0518206	0.100121	-0.0973172	0.316385	0.537017	-0.0595329	0.000202671	0.00106977	0.114016	0.780063	0.829762	0.013358	0.523924	0.583573	-0.059963	0.0678647	0.145134	0.0998906
PENK_E26_F	Y	PENK	NM_006211.2	0.0135438	0.0339877	0.250986	0.0598238	0.241311	-0.0564085	0.00573273	0.0164588	-0.0595597	0.00303634	0.00779902	-0.0861441	0.359499	0.427723	0.0503832	0.44231	0.617065	0.0725526
PENK_P447_R	Y	PENK	NM_006211.2	2.43873e-06	1.594e-05	0.375688	0.0205436	0.127753	-0.0360938	0.00101561	0.00398972	-0.0472724	9.64098e-05	0.000681443	-0.078585	0.944291	0.951726	0.00179775	0.209458	0.35867	0.061478
PGF_E33_F	Y	PGF	NM_002632.4	0.117819	0.19692	0.0746954	0.449434	0.650029	0.0163033	0.151515	0.251162	0.0775147	3.78542e-05	0.000403233	-0.0205087	0.000474322	0.00142854	-0.0315774	2.54315e-06	3.17584e-05	-0.0331627
PGF_P320_F	Y	PGF	NM_002632.4	1.6733e-08	1.73661e-07	0.581183	0.812074	0.909804	-0.0101027	0.22613	0.340192	0.066587	0.167042	0.22929	-0.0529314	0.000337441	0.00109811	0.4175	0.0345222	0.0848416	0.184527
PGR_E183_R	N	PGR	NM_000926.2	0.000124822	0.00057749	-0.305553	0.0927678	0.311117	-0.141759	0.103352	0.183313	-0.0850232	0.447602	0.530082	-0.0369698	3.34305e-06	3.31908e-05	0.135993	0.559791	0.711356	-0.0423373
PGR_P456_R	N	PGR	NM_000926.2	0.0111985	0.0288606	-0.1695	0.331973	0.552449	-0.0460842	0.242704	0.3588	-0.0361008	0.556308	0.62784	-0.0228104	0.729319	0.774713	0.0135837	0.82043	0.902895	-0.0119542
PGR_P790_F	N	PGR	NM_000926.2	2.02296e-08	2.04425e-07	-0.500764	0.0985055	0.320527	-0.149845	0.00534137	0.0155385	-0.176308	0.000537686	0.00217185	-0.292445	0.00367704	0.00735407	0.117475	0.386499	0.568099	0.0515924
PHLDA2_E159_R	Y	PHLDA2	NM_003311.3	0.209454	0.303511	0.0453165	0.514985	0.701878	0.00856043	0.787636	0.839562	-0.0047648	0.00234737	0.00637024	-0.0329351	0.00012315	0.000526903	-0.0801492	4.37038e-08	1.60993e-06	-0.0863785
PHLDA2_P622_F	Y	PHLDA2	NM_003311.3	1.51424e-08	1.60405e-07	0.436117	0.190901	0.422756	-0.0941465	0.0707154	0.134763	-0.106713	0.000154169	0.00090383	-0.172859	7.78857e-05	0.000375895	-0.186447	0.775043	0.872299	0.0182751
PI3_E107_F	N	PI3	NM_002638.2	2.02779e-05	0.000111638	-0.412394	0.0872577	0.301865	-0.164521	0.732494	0.797386	-0.0267507	0.0414597	0.069984	-0.250747	0.983733	0.985658	-0.000981433	0.141878	0.264064	0.0437893
PI3_P1394_R	N	PI3	NM_002638.2	1.00328e-10	1.49616e-09	-0.474152	0.0040084	0.0426951	-0.263864	0.00124438	0.00465051	-0.214892	0.000284895	0.00135062	-0.286286	0.815332	0.845611	0.0203645	0.49217	0.659476	0.0662047
PI3_P274_R	N	PI3	NM_002638.2	0.00034202	0.00141221	-0.118351	0.121492	0.357494	-0.0502645	0.0843297	0.154941	-0.0146368	0.083231	0.126703	-0.0722802	3.13617e-05	0.000191919	0.0796719	0.0889892	0.180577	0.036399
PIK3R1_P307_F	N	PIK3R1	NM_181524.1	0.731538	0.797475	-0.00290173	0.0994545	0.321605	-0.0611012	1.96392e-05	0.000179558	0.0444318	5.81617e-06	0.000113084	0.0658862	0.89013	0.905457	0.0133969	3.52784e-08	1.42599e-06	0.336629
PITX2_E24_R	Y	PITX2	NM_000325.4	0.049864	0.0973203	0.205833	0.00838598	0.0723644	-0.0978829	0.055006	0.110733	-0.050421	0.00867097	0.0185496	-0.0868836	0.338229	0.407647	-0.0276076	0.719407	0.838291	0.0229223
PITX2_P183_R	Y	PITX2	NM_000325.4	2.11126e-05	0.000114938	0.260053	0.190771	0.422756	0.100377	0.438514	0.551287	-0.0206743	0.956787	0.966238	-0.00249093	0.295341	0.362336	0.100941	0.132802	0.249675	0.121756
PKD2_P287_R	Y	PKD2	NM_000297.2	0.181937	0.275055	0.0535247	0.858142	0.933503	0.0010969	0.00203728	0.00703204	-0.0181987	3.5371e-05	0.000393925	-0.0343496	0.31641	0.384194	-0.0128802	0.000605397	0.00270317	-0.0367165
PKD2_P336_R	Y	PKD2	NM_000297.2	0.0060975	0.0170908	0.167292	0.361158	0.578501	-0.00478801	0.0334711	0.0731318	-0.0158985	0.000202696	0.0010725	-0.0339763	0.00125773	0.00303277	-0.0432265	1.81977e-07	4.23511e-06	-0.0542017
PLA2G2A_E268_F	N	PLA2G2A	NM_000300.2	0.000133488	0.000604831	-0.277113	0.0113264	0.0848651	-0.207178	0.0870341	0.159528	-0.0691645	0.638316	0.702953	-0.0270987	0.000124627	0.000531742	-0.314371	0.329281	0.506789	0.0362038
PLA2G2A_P528_F	N	PLA2G2A	NM_000300.2	1.94297e-06	1.29756e-05	-0.399172	0.00437303	0.0444833	-0.251002	1.26252e-06	2.06301e-05	-0.26757	0.00560533	0.0130649	-0.196476	0.00148759	0.0034568	-0.385077	0.0912795	0.184238	-0.123844
PLAGL1_E68_R	Y	LOC645648	XM_933027.1	0.259098	0.35757	-0.0487609	0.222232	0.448553	-0.0794122	0.00505745	0.0149103	-0.0973823	0.997609	0.998718	0.000118442	7.93224e-05	0.000377211	-0.391856	0.0300991	0.0765433	-0.146767
PLAGL1_P236_R	Y	PLAGL1	NM_002656.2	0.959043	0.968708	0.00236126	0.101736	0.32409	-0.0973707	0.533479	0.631297	-0.0161563	0.088527	0.132661	-0.0642209	0.13963	0.187476	0.116961	0.320679	0.498065	-0.0761095
PLAGL1_P334_F	Y	PLAGL1	NM_002656.2	0.661741	0.737615	-0.0175081	0.00917259	0.0756609	-0.132085	0.486651	0.595439	0.0150198	0.125079	0.179889	-0.0863893	0.00107587	0.00266968	0.240502	0.000451127	0.00210617	0.186936
PLAT_E158_F	N	PLAT	NM_000931.2	0.765907	0.824989	0.0308477	0.0002516	0.00501893	-0.162396	0.00105535	0.00409347	-0.156284	1.68752e-06	7.01862e-05	-0.31277	0.0404354	0.061923	0.112492	0.300232	0.475419	0.0520962
PLAT_P80_F	N	PLAT	NM_000931.2	0.255924	0.354143	0.0574599	0.0136571	0.0949201	-0.0420221	0.018601	0.0446424	0.0912066	0.951986	0.963909	-0.0013372	0.142398	0.190359	0.0452641	0.601157	0.74346	-0.00792333
PLAUR_E123_F	Y	PLAUR	NM_001005377.1	0.000856118	0.00316867	0.314787	0.786988	0.896081	-0.00228309	0.251809	0.368894	0.0292146	0.0508771	0.0824339	-0.0209419	0.000150496	0.000612172	0.449393	0.95888	0.97025	-0.00216215
PLAUR_P82_F	Y	PLAUR	NM_001005377.1	0.0173584	0.0415952	0.218135	0.35887	0.576594	-0.00718689	0.395647	0.509827	0.0198624	0.9851	0.988963	-0.000464998	0.384849	0.451933	0.0374519	0.496782	0.660656	-0.0277723
PLAU_P11_F	Y	PLAU	NM_002658.2	0.223299	0.319076	0.0224645	0.952253	0.971488	-0.00020889	0.000594398	0.00257146	-0.0199573	0.000816362	0.00287237	-0.0275549	8.31182e-06	7.25396e-05	-0.0744658	0.14866	0.273463	-0.0460463
PLAU_P176_R	Y	PLAU	NM_002658.2	0.0015324	0.00532527	0.267067	0.0182145	0.117552	-0.021807	0.334078	0.452304	-0.0233153	0.0632821	0.0995916	-0.05981	0.00092615	0.00237094	-0.0697911	2.74815e-06	3.30449e-05	-0.0730781
PLG_E406_F	N	PLG	NM_000301.1	0.00366085	0.0112013	-0.0706941	0.130125	0.366736	-0.0512089	0.000110248	0.000683463	-0.0970782	0.000279464	0.0013331	-0.168637	0.0120019	0.0209898	0.157253	0.0339672	0.0836116	0.143015
PLG_P370_F	N	PLG	NM_000301.1	0.00374397	0.0113876	-0.0900124	0.301112	0.520256	-0.0373051	0.00521996	0.0152674	-0.0512367	0.227574	0.299275	-0.0257871	0.0190931	0.0316706	0.0785166	0.0636553	0.137996	0.0605851
PLS3_E70_F	Y	PLS3	NM_005032.3	0.0593363	0.111283	-0.0375605	0.961026	0.974772	-0.00173925	2.39963e-05	0.000205913	-0.0732336	0.0188498	0.0353097	-0.0651282	0.000551768	0.00157062	-0.0851277	0.554147	0.707857	-0.0192552
PLS3_P94_R	Y	PLS3	NM_005032.3	0.331493	0.430773	-0.0183754	0.986272	0.992696	-0.000600483	1.34215e-05	0.000133003	-0.0744704	0.0152366	0.0295792	-0.0509285	0.000498124	0.00147992	-0.0940636	0.59334	0.736461	0.0318523
PLSCR3_P751_R	Y	PLSCR3	NM_020360.2	2.32086e-09	2.85187e-08	0.422676	0.537256	0.715719	-0.0385299	1.80757e-05	0.000169295	0.295215	0.0506744	0.0822789	0.185943	4.1938e-07	6.85285e-06	0.405028	0.0176028	0.0488933	0.229595
PLXDC1_E71_F	Y	PLXDC1	NM_020405.3	0.065142	0.120262	0.118691	0.856233	0.93341	-0.0014011	0.000356811	0.00171269	-0.0464883	0.000538721	0.00217185	-0.0453604	4.01704e-07	6.6346e-06	-0.0774937	1.02809e-10	2.25592e-08	-0.0772368
PLXDC1_P236_F	Y	PLXDC1	NM_020405.3	0.0243109	0.054593	0.187062	0.00284888	0.0331506	-0.0140787	0.940255	0.955129	-0.00150302	0.00129252	0.00407661	-0.0356148	0.00571306	0.0107926	-0.0344429	3.12625e-05	0.000211538	-0.0378629
PLXDC2_E337_F	Y	PLXDC2	NM_032812.7	0.981291	0.983853	-6.70829e-05	0.378561	0.59638	0.00591036	0.000958692	0.00380504	-0.0285974	0.0102285	0.0209758	-0.0327302	0.000100099	0.00043929	-0.0447375	0.107415	0.211254	-0.0284753
PLXDC2_P914_R	Y	PLXDC2	NM_032812.7	0.799992	0.856896	0.00138075	0.386192	0.60345	0.0308729	0.592613	0.681327	-0.0109118	0.956802	0.966238	0.0018368	0.00345553	0.00702075	-0.158833	0.00263854	0.00993331	-0.133429
PMP22_P1254_F	N	PMP22	NM_000304.2	0.0536453	0.103387	-0.0208703	0.408334	0.620391	-0.03936	0.792763	0.84307	0.00342785	0.150884	0.210306	-0.0310291	0.183475	0.238424	0.0674998	0.0385679	0.0927079	0.113425
PMP22_P975_F	N	PMP22	NM_000304.2	0.00717117	0.0194228	-0.0861957	0.095772	0.314329	-0.0466927	0.00151214	0.00551698	0.033464	0.551045	0.623732	-0.0225424	0.0825627	0.117097	-0.161867	0.448349	0.621538	-0.0657172
PODXL_P1341_R	Y	PODXL	NM_001018111.1	3.7232e-13	8.6649e-12	0.595778	3.42519e-10	6.51028e-08	-0.0844695	0.0131417	0.0333648	0.121533	0.48573	0.562737	0.03519	0.982311	0.984875	-0.00106837	0.428727	0.604706	0.0551535
POMC_E254_F	Y	POMC	NM_000939.1	1.48107e-08	1.57981e-07	0.438114	0.917022	0.959821	0.00150346	0.514638	0.615162	0.0270029	8.62507e-05	0.000630863	-0.0834726	0.250895	0.313058	-0.0210768	0.134667	0.252254	-0.0294673
POMC_P400_R	Y	POMC	NM_000939.1	6.04148e-13	1.36466e-11	0.375571	0.00640742	0.0589329	0.231252	0.70229	0.77413	-0.0193093	0.160941	0.222707	-0.125511	3.47895e-08	8.90612e-07	0.585939	0.200836	0.347784	0.132203
POMC_P53_F	Y	POMC	NM_000939.1	0.0299265	0.0646513	0.151245	0.352059	0.569824	-0.00311868	0.00323473	0.0103944	-0.0116774	3.92312e-05	0.000407156	-0.0180898	0.855954	0.877667	0.00277578	1.04791e-06	1.69431e-05	-0.0295672
PPARD_P846_F	Y	PPARD	NM_006238.2	0.0802241	0.141312	0.0459235	0.923009	0.961048	0.00262055	0.506574	0.609794	-0.0155408	0.0241828	0.0435971	-0.0587768	0.374534	0.442187	-0.0350394	0.764896	0.86643	-0.0125372
PPARG_E178_R	Y	PPARG	NM_005037.4	0.386171	0.482635	0.00668464	0.987655	0.992826	7.8433e-05	0.000375789	0.00177604	-0.0110681	0.0107433	0.0218567	-0.0122937	0.00172575	0.00390931	-0.0315719	0.000126356	0.000683391	-0.0282715
PPARG_P693_F	Y	PPARG	NM_005037.4	0.377103	0.475286	0.028611	0.265413	0.494049	0.0687827	0.0907066	0.164882	0.0801279	0.0997458	0.148029	0.115012	0.000430721	0.00133385	0.247021	0.103613	0.204826	0.141909
PPAT_E170_R	Y	PAICS	NM_006452.2	0.121659	0.202239	-0.0790967	0.762984	0.878728	0.0196805	0.000873685	0.00350761	-0.108832	0.146243	0.205328	-0.0626591	0.114834	0.156787	0.133003	0.107756	0.211653	-0.10549
PPP2R1B_P268_R	Y	PPP2R1B	NM_181699.1	0.636449	0.714088	0.0152168	0.353006	0.57021	-0.00736075	0.677275	0.752746	-0.0168991	0.00014056	0.000851532	-0.0609507	0.0567718	0.0842527	-0.0312847	1.30778e-06	2.02904e-05	-0.0470837
PRDM2_P1340_R	N	PRDM2	NM_001007257.1	0.91331	0.936295	0.00112775	0.0945041	0.314329	-0.097662	0.368532	0.48218	0.0121893	0.344317	0.428583	-0.0304313	0.00098013	0.0025008	0.140569	0.592836	0.736461	-0.0429325
PRKAR1A_P337_R	Y	PRKAR1A	NM_212472.1	0.0840505	0.146873	-0.0086082	0.350844	0.568456	-0.00450088	0.00010954	0.000683463	-0.0276394	2.33857e-05	0.000295031	-0.0395451	0.00714806	0.0131964	-0.0483741	0.0541142	0.121165	-0.0415916
PRKCDBP_E206_F	Y	PRKCDBP	NM_145040.2	9.20734e-21	5.78959e-19	0.696311	0.443793	0.644296	0.0633672	0.00855738	0.0230195	0.148258	0.0519365	0.0837088	-0.017327	2.78242e-09	1.01757e-07	0.609188	0.0377897	0.0918014	0.177396
PRKCDBP_P352_R	Y	PRKCDBP	NM_145040.2	6.65095e-17	2.1283e-15	0.52901	0.00141294	0.0198372	0.343964	0.011935	0.0308103	0.155794	0.410646	0.49432	-0.0293358	0.000848199	0.00220446	0.250205	0.804786	0.89231	0.0196976
PROK2_E0_F	Y	PROK2	NM_021935.2	0.0357335	0.0748794	0.00828577	0.42332	0.631769	0.0169237	0.000785325	0.00321669	-0.0123503	0.0117568	0.023483	-0.0140884	8.93307e-05	0.000409588	-0.0512644	1.62986e-06	2.33969e-05	-0.0478459
PROK2_P390_F	Y	PROK2	NM_021935.2	0.000621357	0.00237414	0.316348	0.99264	0.995231	9.9913e-05	0.102812	0.182566	0.0804093	0.885364	0.919361	0.00399869	0.0481956	0.0727195	-0.0134979	0.877422	0.927543	0.00276586
PROM1_P44_R	N	PROM1	NM_006017.1	0.167814	0.258186	-0.0544786	1.27265e-05	0.000398936	-0.538255	0.488279	0.596182	-0.0200407	0.573244	0.645057	0.0140231	0.00739819	0.0135928	0.0670524	0.949288	0.964356	0.00321308
PRSS1_E45_R	N	PRSS1	NM_002769.2	5.45657e-09	6.30173e-08	-0.445694	0.0121637	0.0885471	-0.203203	0.0798542	0.148674	-0.0632665	0.95011	0.962645	-0.00365466	0.00694188	0.0128777	-0.303931	0.209964	0.359137	0.0795898
PRSS1_P1249_R	N	PRSS1	NM_002769.2	3.3515e-11	5.36241e-10	-0.542091	0.00105358	0.0157606	-0.311222	0.48275	0.591311	-0.0361881	0.0181207	0.0341513	-0.161088	0.000516697	0.00152331	-0.403545	0.741485	0.855046	-0.0233083
PRSS1_P1378_F	N	PRSS1	NM_002769.2	1.32478e-08	1.44317e-07	-0.366659	0.0238934	0.142249	-0.202028	0.165009	0.268489	0.108451	0.367555	0.454604	-0.0948204	0.853357	0.876174	0.0175756	0.874898	0.92673	-0.0123415
PRSS8_E134_R	Y	PRSS8	NM_002773.2	0.000138695	0.000622909	0.0739124	0.112506	0.340175	-0.0929061	5.04521e-09	5.57935e-07	0.120018	0.35928	0.445762	-0.0523276	3.6923e-05	0.000214463	0.141355	9.43072e-06	8.14601e-05	0.123544
PSCA_E359_F	N	PSCA	NM_005672.2	9.5498e-10	1.27552e-08	-0.435161	0.00201566	0.0255872	-0.258723	0.830454	0.873684	-0.0105605	0.204121	0.272398	-0.0708336	0.438284	0.501269	0.0521563	0.858646	0.921006	-0.0125087
PSCA_P135_F	N	PSCA	NM_005672.2	1.68762e-05	9.42614e-05	-0.319748	0.0398606	0.196868	-0.155093	0.183706	0.290003	0.0513578	0.602112	0.674085	0.0286098	0.0879433	0.123249	-0.14818	0.270411	0.438134	0.0728748
PSIP1_P163_R	Y	PSIP1	NM_033222.2	0.505052	0.591732	0.00152622	0.0350455	0.184349	0.00626818	0.00202828	0.00701677	-0.0102772	0.000370148	0.00162567	-0.0168636	0.000129375	0.00054444	-0.0375648	0.000220771	0.00110818	-0.0302801
PTCH2_E173_F	Y	PTCH2	NM_003738.3	1.23751e-07	1.09874e-06	0.384341	0.417001	0.628248	-0.025763	0.996275	0.997574	0.000260583	0.0447174	0.0746587	-0.0958617	0.802399	0.836149	-0.0178165	0.671744	0.802956	0.0229076
PTCH2_P37_F	Y	PTCH2	NM_003738.3	0.121836	0.202313	0.0687357	0.6309	0.785939	0.00415156	0.538683	0.634675	0.0232511	0.0517896	0.0835596	-0.0123	0.000495232	0.00147418	-0.0623553	3.05341e-06	3.55306e-05	-0.0615045
PTCH2_P568_R	Y	PTCH2	NM_003738.3	0.0323572	0.0690287	0.0493836	0.6342	0.788132	0.0053709	0.018703	0.0448173	0.146361	0.200776	0.269103	-0.0375638	0.00149494	0.00346862	-0.0420705	0.189672	0.331441	-0.0182468
PTCH_E42_F	Y	PTCH	NM_000264.2	0.0448661	0.0890366	0.0033623	0.262736	0.493796	0.0023427	0.0472177	0.0982743	-0.00395402	0.000171525	0.000972184	-0.0105248	0.000137389	0.000575014	-0.0275506	7.70259e-07	1.40847e-05	-0.0274229
PTEN_P438_F	Y	PTEN	NM_000314.3	0.83717	0.885601	0.000863641	0.835007	0.919186	0.00110029	0.924818	0.944495	0.00311207	0.000197741	0.00105462	-0.0289345	0.000213412	0.000791791	-0.0409932	9.65117e-06	8.14601e-05	-0.0384208
PTGS1_E80_F	Y	PTGS1	NM_000962.2	3.77167e-15	9.98842e-14	0.71986	0.793262	0.897988	-0.0100413	0.254436	0.372204	0.0265111	0.127234	0.182305	-0.0150751	0.914502	0.925956	-0.00609413	3.62785e-05	0.000238136	-0.0710823
PTGS1_P2_F	Y	PTGS1	NM_000962.2	2.84186e-07	2.24119e-06	0.399855	0.156967	0.389546	-0.00639783	0.0376485	0.0808784	-0.0119166	0.00261533	0.00690233	-0.021292	0.000458598	0.00139211	-0.0441839	5.17692e-06	5.16723e-05	-0.0434098
PTGS2_P308_F	Y	PTGS2	NM_000963.1	0.0743891	0.133344	-0.0130552	0.0481795	0.2183	-0.0147462	0.989069	0.991737	0.000627766	0.194133	0.261568	-0.0378684	0.0738015	0.106241	-0.0404511	2.32667e-05	0.000166998	-0.0605098
PTGS2_P524_R	Y	PTGS2	NM_000963.1	0.160267	0.250173	-0.0174391	0.12649	0.361804	-0.0168704	0.508189	0.610304	0.0351836	0.00329658	0.00838336	-0.0699105	0.679311	0.727656	0.0246056	0.985113	0.988976	-0.000878426
PTHLH_E251_F	N	PTHLH	NM_198964.1	0.00713076	0.0193513	0.111151	0.0175826	0.115146	-0.214543	4.30645e-05	0.000322668	0.170515	4.40502e-05	0.000420255	0.205633	0.000228089	0.0008209	0.188237	0.444148	0.618505	0.036113
PTHLH_P15_R	N	PTHLH	NM_198964.1	0.643844	0.72133	0.0087445	0.0340832	0.181332	-0.152848	0.00117911	0.00447189	0.0617262	0.0319553	0.0554614	0.049472	0.201219	0.25799	0.048693	0.918504	0.953391	0.00697297
PTHLH_P757_F	N	PTHLH	NM_198964.1	0.323932	0.424539	-0.0138836	0.14881	0.386103	-0.085793	0.344882	0.461847	0.0177707	0.932541	0.951749	-0.00158378	5.41782e-05	0.000285971	0.207494	0.202951	0.349476	0.0864286
PTHR1_E36_R	N	PTHR1	NM_000316.2	0.258697	0.357336	-0.0109317	0.0143906	0.0995674	-0.0762616	0.131983	0.22392	0.0122022	0.0974329	0.144876	0.0194262	0.00238755	0.00516924	0.121292	3.87509e-05	0.000249043	0.138605
PTHR1_P170_R	N	PTHR1	NM_000316.2	0.296493	0.397394	-0.0211405	0.364296	0.581917	-0.0265894	0.405717	0.521055	0.00976333	0.043946	0.0736144	0.0289696	0.349204	0.418065	0.0535346	0.490617	0.659476	0.0484418
PTHR1_P258_F	N	PTHR1	NM_000316.2	0.139914	0.22481	-0.0846283	0.00403299	0.0426951	-0.213385	0.00521498	0.0152674	-0.139052	0.185481	0.250791	-0.0679229	0.00505934	0.00973828	-0.328832	0.195394	0.340664	-0.102127
PTK2B_P673_R	Y	PTK2B	NM_173175.1	0.5398	0.621539	0.00169121	0.36577	0.582803	0.00244168	6.38046e-06	7.47081e-05	-0.01543	4.47948e-05	0.000424721	-0.0201765	9.67791e-05	0.000431688	-0.0334208	8.45983e-06	7.6437e-05	-0.0281738
PTK2_P735_R	Y	PTK2	NM_005607.3	0.286672	0.386931	0.0853014	0.164841	0.39316	-0.00655883	0.539788	0.635337	0.0106925	0.000244687	0.00122124	-0.0248789	0.316116	0.384141	0.0784062	0.471612	0.642258	-0.0299143
PTK6_E50_F	Y	PTK6	NM_005975.2	0.154253	0.242759	0.0703845	0.43212	0.635947	-0.0545061	0.000144207	0.000820377	0.111615	2.20111e-08	4.82987e-06	0.206422	0.391526	0.456978	0.0592454	0.794822	0.885313	-0.0179361
PTK7_E317_F	Y	PTK7	NM_002821.3	0.713841	0.782626	0.010328	0.81353	0.909804	-0.00977587	5.29246e-07	1.0839e-05	-0.216466	0.0110699	0.0223142	-0.155723	0.00774726	0.0141833	-0.11223	0.000240112	0.0011901	-0.127146
PTPN6_E171_R	Y	PTPN6	NM_080548.2	0.877687	0.917102	0.0129761	7.65782e-08	5.88121e-06	-0.168091	0.0406965	0.0862817	0.0768387	0.427037	0.511246	0.0487405	1.88871e-08	5.47368e-07	0.455461	0.0558747	0.124744	0.177941
PTPN6_P282_R	N	PTPN6	NM_080548.2	0.225891	0.321268	-0.0876478	0.00386857	0.0415534	-0.27631	0.0209455	0.0492685	0.114693	0.00359028	0.00904044	0.129483	0.000129743	0.000544495	0.0857114	0.667035	0.801068	-0.0233472
PTPNS1_E433_R	Y	PTPNS1	NM_080792.1	0.898953	0.931154	0.000201667	0.176402	0.40588	0.00339382	0.000192685	0.00103847	-0.00711482	3.65637e-05	0.000397513	-0.0111211	8.19806e-05	0.000383909	-0.027624	2.90111e-06	3.45434e-05	-0.024803
PTPNS1_P301_R	Y	PTPNS1	NM_080792.1	0.344458	0.440173	0.00240325	0.417196	0.628248	0.00223533	0.110654	0.194024	-0.00522013	0.00077202	0.00273862	-0.0106138	0.00206118	0.00455537	-0.0329743	0.000157184	0.000832536	-0.029674
PTPRF_E178_R	Y	PTPRF	NM_002840.2	0.242523	0.33865	-0.00761247	0.296066	0.514432	0.027505	1.70466e-06	2.59243e-05	-0.0484057	0.000358658	0.00159681	-0.0518129	0.0902315	0.126111	-0.022456	0.000305273	0.00147453	-0.0325389
PTPRG_E40_R	Y	PTPRG	NM_002841.2	0.198616	0.291296	-0.0113759	0.811406	0.909804	-0.00372426	8.50329e-07	1.57362e-05	-0.0494195	0.0168865	0.0321409	-0.0341744	0.0087838	0.0158915	-0.0519382	0.240783	0.400263	-0.0316326
PTPRG_P476_F	Y	PTPRG	NM_002841.2	0.954584	0.965903	-0.00023225	0.938366	0.965556	-0.000404077	2.80934e-05	0.000233251	-0.0318288	0.00949697	0.0198673	-0.029527	0.0019188	0.00427762	-0.0355458	6.64342e-05	0.000393988	-0.0357963
PTPRH_E173_F	N	PTPRH	NM_002842.2	0.120509	0.200761	-0.0923863	0.00794345	0.0689329	-0.225777	0.569897	0.66215	0.0150072	0.782756	0.831476	-0.0157584	0.248234	0.310494	0.0891887	0.510819	0.672915	-0.0494085
PTPRH_P255_F	N	PTPRH	NM_002842.2	0.701175	0.772047	0.00227808	0.204043	0.438634	-0.0264578	0.292016	0.413779	0.00623683	8.74961e-05	0.000633934	0.0236476	0.856946	0.878098	-0.0164596	0.0055948	0.0186818	0.0842296
PTPRO_E56_F	Y	PTPRO	NM_002848.2	0.285888	0.386213	0.00365167	0.500577	0.690203	0.00177753	0.0126285	0.0323289	-0.00671507	0.00877927	0.0187291	-0.00994616	0.0011619	0.00285093	-0.0206938	9.14299e-05	0.000520135	-0.0196076
PTPRO_P371_F	N	PTPRO	NM_002848.2	0.167921	0.258186	0.103325	0.015307	0.104496	-0.0849555	0.0217528	0.0509335	0.11801	0.741461	0.794201	0.0154354	0.491946	0.55317	-0.0296805	0.71763	0.836963	-0.0152102
PURA_P928_R	Y	PURA	NM_005859.3	2.93583e-05	0.000151833	0.454593	0.00167784	0.0224101	-0.0220494	0.520633	0.620879	-0.0061735	1.61192e-05	0.000238068	-0.0284641	0.000142487	0.000586754	-0.0500645	8.3005e-07	1.48251e-05	-0.052264
PWCR1_E81_R	N	PWCR1	NR_001290.1	0.0335278	0.0709349	-0.101645	0.132051	0.368112	-0.0639218	0.0253124	0.0575998	-0.033062	0.125809	0.18077	-0.014232	0.72278	0.769896	0.0135548	0.00108695	0.00445215	0.1007
PWCR1_P357_F	N	PWCR1	NR_001290.1	0.000524534	0.00205692	-0.197704	0.0687952	0.264174	-0.128112	0.0409795	0.0864623	-0.062705	0.299004	0.380108	-0.0334464	0.0480295	0.0725401	-0.0993276	0.804296	0.89231	0.0150002
PWCR1_P811_F	N	PWCR1	NR_001290.1	0.0076189	0.0203878	-0.163078	0.233505	0.461007	-0.0806064	0.0407659	0.0862817	-0.0333973	0.119139	0.172315	-0.0403111	0.000284477	0.000968396	-0.187251	0.38025	0.560942	0.0466556
PXN_P308_F	Y	PXN	NM_002859.1	0.00546812	0.0155826	0.208225	0.092588	0.311117	-0.0362765	0.77085	0.828766	-0.0130872	0.0163337	0.0313607	-0.0678902	0.0031366	0.00644094	-0.0637439	0.0597406	0.130789	-0.0517531
PYCARD_E87_F	Y	PYCARD	NM_145182.1	0.000134161	0.00060609	0.410741	0.148072	0.38549	-0.022793	0.195708	0.303951	0.0869754	4.83685e-05	0.000444874	-0.0833083	5.6671e-15	1.08808e-12	0.715885	0.0597746	0.130789	0.167789
PYCARD_P150_F	Y	PYCARD	NM_145182.1	0.0389468	0.0799764	0.0646708	0.000113597	0.00268438	-0.242589	0.605925	0.693002	-0.0245938	0.298067	0.379627	-0.0629855	0.000521941	0.00152829	0.183171	0.625634	0.766327	0.0290062
PYCARD_P393_F	N	PYCARD	NM_145182.1	0.042118	0.0848742	0.130336	6.14647e-06	0.000236025	-0.264799	0.359608	0.474128	0.0361927	0.0465993	0.07713	0.0877113	6.26854e-05	0.000313631	0.255527	0.560586	0.711356	0.036683
RAB32_E314_R	Y	RAB32	NM_006834.2	0.691158	0.763205	0.00266819	0.829855	0.915702	0.00126381	0.000147609	0.000836633	-0.025507	0.00181272	0.00525346	-0.0303324	1.00336e-06	1.37558e-05	0.698526	0.452009	0.624358	0.0407582
RAB32_P493_R	Y	RAB32	NM_006834.2	6.5629e-08	6.18442e-07	0.378535	0.0496635	0.219323	0.174099	0.0242429	0.0559116	0.139368	0.195882	0.263232	0.0999869	1.03346e-07	2.08868e-06	0.433305	0.00563087	0.0187614	0.208421
RAD50_P191_F	Y	RAD50	NM_133482.1	0.021105	0.0487529	0.194379	0.0300914	0.166861	-0.129542	0.914707	0.939164	0.00613729	0.0347489	0.0597028	-0.122398	0.0614855	0.0903749	0.236543	0.051003	0.115207	0.205703
RAD54B_P227_F	Y	RAD54B	NM_134434.1	0.669994	0.744653	-0.0164368	0.0553159	0.231835	-0.028972	9.42498e-06	0.000102434	-0.0983875	0.460684	0.542647	-0.0426728	0.000353918	0.00114294	-0.107773	3.91782e-06	4.20823e-05	-0.103636
RAF1_P330_F	Y	RAF1	NM_002880.2	0.191469	0.28429	-0.00450663	0.710565	0.846318	0.00228382	0.00059599	0.00257146	-0.0156142	0.0522043	0.0840522	-0.0139157	0.000187961	0.000718179	-0.0274639	0.696677	0.824753	0.0121331
RAN_P581_R	Y	RAN	NM_006325.2	7.3341e-10	1.00582e-08	0.261893	0.214664	0.443615	-0.101858	0.420326	0.535317	0.0303733	0.0891164	0.133284	-0.140654	1.93732e-06	2.23739e-05	0.454161	0.00914676	0.0284401	0.23041
RAP1A_P285_R	Y	RAP1A	NM_001010935.1	0.18641	0.279069	0.113157	0.968858	0.980346	0.00200854	0.00262048	0.00867468	-0.0677987	0.140821	0.199539	-0.0668594	0.0242965	0.0392422	-0.0812576	0.52667	0.684983	0.026611
RARA_E128_R	N	RARA	NM_000964.2	0.00540897	0.0154427	0.183717	0.4563	0.656251	0.0154691	6.39722e-08	2.23321e-06	-0.062055	9.62323e-07	5.27903e-05	-0.0763008	0.00725842	0.013368	0.29315	0.885887	0.932875	0.00463841
RARA_P1076_R	N	RARA	NM_000964.2	0.00402688	0.0120571	0.0696928	0.0431062	0.206153	-0.167536	0.000793185	0.00324024	-0.215194	0.0230193	0.0417939	-0.188968	0.0523837	0.078346	0.0792563	0.0272776	0.0706549	-0.160794
RARA_P176_R	N	RARA	NM_000964.2	1.57289e-06	1.08827e-05	0.426141	0.619643	0.778227	0.0268742	2.84487e-07	6.8733e-06	-0.190279	9.27255e-05	0.000665544	-0.203318	0.00518468	0.00995458	0.21493	0.699964	0.826399	0.0280389
RARB_E114_F	Y	RARB	NM_016152.2	5.62707e-05	0.000277916	0.416785	0.317169	0.537357	-0.00449749	0.0591717	0.117275	0.059943	0.00140309	0.00429046	-0.0107628	4.42204e-05	0.000248333	-0.0228775	1.38208e-06	2.08126e-05	-0.0211312
RARB_P60_F	Y	RARB	NM_016152.2	8.37519e-05	0.000398275	0.536962	0.0716526	0.273098	-0.0411814	0.0898077	0.16383	-0.0173082	0.000375762	0.00164436	-0.0384646	0.00393127	0.00781167	-0.0254118	0.871134	0.92673	-0.00303704
RARRES1_E235_F	Y	RARRES1	NM_206963.1	3.65365e-07	2.84873e-06	0.487574	0.0401903	0.19786	-0.0144836	0.0196577	0.0468128	0.144236	0.00198899	0.00556482	-0.0121258	0.138361	0.186097	0.117073	0.88379	0.93171	-0.00588982
RARRES1_P426_R	Y	RARRES1	NM_206963.1	4.1535e-15	1.08132e-13	0.503051	0.872531	0.938386	0.0129338	2.78939e-07	6.8733e-06	0.283383	0.19482	0.262264	-0.0794923	0.00217587	0.00476768	0.375707	0.0778287	0.161547	0.174909
RARRES1_P57_R	Y	RARRES1	NM_206963.1	8.55481e-06	5.01534e-05	0.318627	0.951796	0.971488	-0.00300105	0.888068	0.917561	0.00994302	0.00518445	0.0123041	-0.174549	0.868972	0.888051	0.0146844	0.060317	0.131601	-0.118843
RASA1_E107_F	Y	RASA1	NM_022650.1	0.807174	0.861584	0.000560684	0.423911	0.631769	0.00225269	0.0150498	0.0374053	-0.00641098	0.00142649	0.00433879	-0.0107151	4.49283e-05	0.000250945	-0.039789	0.0330971	0.0819688	-0.0273148
RASGRF1_E16_F	Y	RASGRF1	NM_002891.3	0.819209	0.870799	-0.000499825	0.579706	0.746377	0.00167236	0.00638908	0.018073	-0.00628207	0.00133949	0.00417333	-0.00978556	0.00055217	0.00157062	-0.0330139	6.29505e-05	0.000374775	-0.0286094
RASGRF1_P768_F	Y	RASGRF1	NM_002891.3	0.00341545	0.0105769	-0.0230434	0.885545	0.941897	-0.00385023	5.57236e-05	0.000403733	-0.0270547	5.65018e-05	0.000490321	-0.0381349	0.0188177	0.0312813	-0.0371123	0.15514	0.282007	-0.0319073
RASSF1_E116_F	Y	RASSF1	NM_170712.1	6.11477e-09	6.9061e-08	0.593081	0.841527	0.922617	0.00953111	0.0168431	0.041065	0.172556	0.418566	0.50228	-0.0374458	1.04695e-09	4.72977e-08	0.702731	0.0404721	0.0966798	0.214944
RASSF1_P244_F	Y	RASSF1	NM_170712.1	5.40466e-12	1.00019e-10	0.5672	0.672086	0.818655	-0.0204864	0.39658	0.510601	0.0447598	0.46368	0.545521	0.0585271	6.28575e-06	5.71296e-05	0.328754	0.588494	0.7349	-0.0505398
RBL2_P250_R	Y	RBL2	NM_005611.2	0.718754	0.786889	-0.00435033	0.0808339	0.290775	-0.0185067	0.260796	0.380059	-0.0107892	0.147066	0.206106	-0.0212347	0.854169	0.876421	-0.00498125	0.846842	0.914438	0.00832489
RBP1_E158_F	Y	RBP1	NM_002899.2	4.51622e-14	1.08389e-12	0.570968	0.0152499	0.104496	-0.0168908	0.0305507	0.0673254	0.0576703	0.00102184	0.00341207	-0.0184409	7.30853e-15	1.24732e-12	0.79995	0.175207	0.31112	0.106602
RBP1_P150_F	Y	RBP1	NM_002899.2	3.63251e-16	1.05274e-14	0.673734	0.172145	0.402479	-0.0110165	0.00375338	0.0116704	0.124698	0.264642	0.341588	-0.0102582	4.90037e-15	1.07528e-12	0.724356	0.179181	0.315983	0.0832615
RBP1_P426_R	Y	RBP1	NM_002899.2	1.05709e-20	5.79888e-19	0.590944	8.198e-10	1.25921e-07	-0.205057	0.00380807	0.0118165	0.235061	0.923696	0.946146	0.00773646	1.08685e-09	4.76973e-08	0.682224	0.0640396	0.138542	0.199895
RET_P717_F	N	RET	NM_020630.3	0.0671782	0.123576	0.0593463	0.861338	0.933674	0.00526266	0.179509	0.284841	0.0345071	4.22095e-05	0.000415217	-0.0511613	0.294875	0.362053	0.0604949	0.52386	0.684226	-0.0205729
RET_seq_53_S374_F	Y	RET	NM_020630.3	0.219976	0.315484	0.0216451	0.481795	0.67707	0.00922483	0.491398	0.598562	0.0326013	9.44266e-06	0.000159384	-0.025253	0.000443398	0.00135766	-0.04743	0.574996	0.723929	-0.0177516
RET_seq_54_S260_F	Y	RET	NM_020630.3	0.729977	0.796339	0.0229271	0.847244	0.927488	-0.00525787	0.00191848	0.0067125	-0.0725749	0.00319217	0.00814481	-0.0780596	0.0764023	0.10937	-0.050089	0.00844923	0.0265399	-0.0580819
RHOC_P536_F	Y	RHOC	NM_175744.3	0.320198	0.420004	-0.00641243	0.826233	0.914133	0.00188287	0.000127569	0.000755491	-0.0251573	0.000207643	0.0010875	-0.0361197	0.369768	0.437905	0.0226324	0.000829308	0.00357814	-0.0335698
RHOH_P121_F	Y	RHOH	NM_004310.2	0.951592	0.964146	0.00222742	0.161815	0.39122	-0.0857124	0.899618	0.925528	0.00441501	0.553185	0.625233	-0.034278	3.98322e-06	3.89696e-05	0.405465	0.669186	0.80137	0.0420022
RHOH_P953_R	N	RHOH	NM_004310.2	1.88566e-06	1.26479e-05	-0.155616	0.14351	0.382999	-0.0778652	0.431875	0.545526	-0.0395083	0.0056837	0.0131876	0.0369298	0.015479	0.0261847	0.0742725	0.487119	0.656904	-0.0602929
RIPK1_P744_R	N	RIPK1	NM_003804.3	5.49878e-06	3.35164e-05	0.152383	0.583032	0.749403	-0.0454754	9.46985e-06	0.000102434	0.226673	7.34955e-07	4.51556e-05	0.341784	8.93475e-06	7.54054e-05	0.159206	0.150098	0.275778	-0.124077
RIPK1_P868_F	N	RIPK1	NM_003804.3	0.000244699	0.00104405	0.0540257	0.240467	0.470518	-0.10476	7.1434e-07	1.4067e-05	0.206225	4.86259e-06	0.000105835	0.27083	0.0130621	0.0225431	0.0959786	0.403278	0.583272	-0.0452964
RIPK2_E123_F	Y	RIPK2	NM_003821.4	0.00277927	0.00885675	-0.0208238	0.134848	0.372477	-0.0162071	1.15114e-05	0.000116421	-0.0439484	0.00414612	0.0101895	-0.0407753	0.0246683	0.0397175	-0.0446831	0.0636974	0.137996	-0.0389783
RIPK3_P124_F	N	RIPK3	NM_006871.2	0.00191735	0.00641622	0.1174	0.711786	0.846318	0.0287458	0.0886049	0.16202	-0.0782685	0.0383921	0.0653772	-0.166044	0.00137115	0.00323075	0.207924	0.762983	0.86618	0.0282951
RIPK3_P24_F	N	RIPK3	NM_006871.2	1.70869e-05	9.4749e-05	0.298591	0.151601	0.387543	0.14849	0.00592391	0.0169129	-0.191507	3.35465e-06	9.20132e-05	-0.421155	0.000700584	0.00188488	0.30826	0.310867	0.487236	0.103454
RIPK4_E166_F	Y	RIPK4	NM_020639.2	0.517532	0.602219	-0.00723119	0.329477	0.550683	0.0419661	0.00104154	0.00406042	-0.024408	0.90327	0.931782	-0.00214998	0.777921	0.815066	0.00693207	0.0982782	0.196046	-0.0210882
RIPK4_P172_F	Y	RIPK4	NM_020639.2	0.078994	0.139948	0.14882	0.278392	0.499545	0.0889533	0.774837	0.830764	0.0119094	0.395002	0.478102	-0.0262613	0.388996	0.454781	0.0363112	0.29623	0.47005	0.0468748
ROR1_P6_F	Y	ROR1	NM_005012.1	0.467299	0.559011	0.00253298	0.219471	0.444919	0.00624994	0.000204048	0.00107335	-0.02729	0.0105257	0.0214993	-0.0283004	0.00175642	0.00396162	-0.108819	4.52336e-05	0.000283587	-0.102851
ROR2_E112_F	Y	ROR2	NM_004560.2	0.36486	0.462397	0.0228763	0.211717	0.442614	0.0204906	0.00591202	0.0169104	-0.0193271	0.000612191	0.00235081	-0.0292075	0.160171	0.211542	-0.023711	0.463269	0.634208	0.0489003
ROR2_P317_R	Y	ROR2	NM_004560.2	0.0687393	0.125995	0.116259	0.216031	0.443615	0.00621304	0.62455	0.709024	0.0147538	9.48606e-05	0.000674565	-0.0193676	0.769154	0.807532	0.0119518	0.912863	0.95126	0.00401982
RRAS_P100_R	Y	RRAS	NM_006270.2	0.921116	0.941967	0.000505358	0.391353	0.60719	0.00691032	0.00087462	0.00350761	-0.0163942	0.00231319	0.00631093	-0.0240712	0.00164737	0.00375982	-0.0387129	0.739667	0.85359	0.0091838
RUNX1T1_E145_R	N	RUNX1T1	NM_175635.1	0.0113547	0.0291166	0.256449	0.00169797	0.0224835	-0.170942	0.771033	0.828766	0.0097965	0.0115001	0.023141	-0.0973094	0.000686189	0.00185494	0.356653	0.31539	0.492817	-0.0618325
RUNX1T1_P103_F	Y	RUNX1T1	NM_175635.1	0.013377	0.0337183	0.236326	0.988851	0.993378	0.000852366	0.661748	0.741389	0.016491	0.705662	0.76277	0.0263441	0.380696	0.448427	0.0716123	0.010885	0.0330226	-0.220248
RUNX3_E27_R	N	RUNX3	NM_001031680.1	0.015216	0.037515	-0.0680351	0.10484	0.327971	-0.0571057	0.0399453	0.0852167	-0.103637	0.11884	0.172044	-0.0440335	0.0416652	0.0637428	0.0303116	0.78837	0.881964	-0.00572273
RUNX3_P247_F	Y	RUNX3	NM_001031680.1	0.020575	0.047667	-0.119703	0.0167253	0.112183	-0.0940071	0.153733	0.252863	-0.0410343	0.393893	0.477958	-0.0417104	0.0355477	0.0552086	0.0461726	0.412923	0.592204	-0.0240138
RUNX3_P393_R	Y	RUNX3	NM_001031680.1	0.133624	0.217871	-0.0162927	0.0634824	0.250361	-0.0440842	0.719921	0.789012	-0.003514	0.81419	0.858926	0.00299156	0.0172096	0.0289212	0.0447195	0.544022	0.700111	-0.0234048
RYK_P493_F	Y	RYK	XM_940269.1	0.000450376	0.00182047	-0.0629942	0.380898	0.598833	-0.0226199	0.0549714	0.110733	-0.0778425	1.36889e-05	0.000216764	-0.112231	0.122719	0.166663	0.123369	0.764129	0.866201	-0.0140422
S100A12_P1035_R	N	S100A12	NM_005621.1	0.0247051	0.0552358	-0.0950363	0.129813	0.366736	-0.0539376	0.190369	0.297767	0.0435722	7.03579e-06	0.00012732	0.0877633	0.00313312	0.00644094	0.0874421	0.477095	0.647938	0.0369821
S100A12_P1221_R	N	S100A12	NM_005621.1	0.00206515	0.00680703	-0.222704	0.154181	0.38887	-0.0842876	0.830059	0.873684	-0.00797582	0.264601	0.341588	0.0266342	0.000662527	0.00181075	0.0799123	0.00130568	0.00525007	0.0804358
S100A2_E36_R	N	S100A2	NM_005978.3	0.363475	0.461022	-0.0675566	0.0313504	0.173217	0.129404	0.0149482	0.0372733	0.118403	0.3951	0.478102	0.0657979	0.286283	0.352914	0.0549789	0.00302937	0.0111833	-0.310196
S100A2_P1186_F	N	S100A2	NM_005978.3	0.906544	0.932653	0.00408317	0.00196856	0.0254093	0.0869941	6.11859e-05	0.000433095	0.194429	0.223434	0.294335	-0.0978836	0.678893	0.727656	-0.0381144	0.000482436	0.002229	-0.27944
S100A4_E315_F	N	S100A4	NM_019554.1	3.79806e-12	7.29227e-11	0.383539	0.537173	0.715719	-0.0528403	0.0228727	0.0533928	-0.117076	0.0095068	0.0198673	-0.129569	0.000292911	0.000984488	0.213976	0.698071	0.825356	-0.0326896
S100A4_P194_R	N	S100A4	NM_019554.1	0.311342	0.412182	-0.0281433	0.857823	0.933503	0.00438128	0.820086	0.865266	-0.00218666	0.0460095	0.0764834	0.0203751	4.60126e-05	0.000254326	0.0620105	0.67367	0.804632	0.00683261
S100A4_P887_R	N	S100A4	NM_019554.1	0.014631	0.0361887	-0.0980482	0.549606	0.723937	-0.0116826	0.683229	0.758266	-0.00620284	0.0450232	0.0750875	0.0181375	0.00137139	0.00323075	0.0881462	0.120448	0.23011	0.0812655
SCGB3A1_E55_R	Y	SCGB3A1	NM_052863.2	0.000891314	0.00327526	0.36252	0.640401	0.793911	0.0143481	0.455856	0.566274	-0.0148332	0.024246	0.0436598	-0.038083	1.20107e-13	1.41911e-11	0.75458	0.0443394	0.103661	0.181447
SCGB3A1_P103_R	Y	SCGB3A1	NM_052863.2	1.3489e-06	9.63682e-06	0.502794	0.393351	0.60906	0.0426656	0.245289	0.361577	0.0656997	0.00136958	0.00421209	-0.063401	8.02315e-12	6.48609e-10	0.632985	0.266887	0.432881	0.0825574
SEMA3A_P343_F	N	SEMA3A	NM_006080.1	0.0733572	0.13225	0.188093	0.691476	0.836438	-0.0094672	0.000103787	0.000650679	-0.0915105	0.000353934	0.0015896	-0.124879	0.273263	0.338766	-0.0341862	0.000866432	0.00371743	-0.0726061
SEMA3A_P658_R	N	SEMA3A	NM_006080.1	0.0289227	0.0633742	0.236764	0.0767187	0.279946	-0.0799624	0.778662	0.832886	0.0137905	0.01255	0.0249054	-0.0918056	0.455468	0.517455	0.0430071	0.125472	0.23852	-0.0591762
SEMA3B_E96_F	N	SEMA3B	NM_004636.2	0.00776654	0.0207468	0.104517	0.961969	0.974772	-0.000715856	6.75974e-05	0.000469817	-0.192064	9.36209e-05	0.000668845	-0.263054	1.91882e-06	2.23281e-05	0.499946	0.305036	0.481465	0.0551866
SEMA3B_P110_R	N	SEMA3B	NM_004636.2	2.11281e-06	1.39883e-05	0.356673	0.870936	0.938386	-0.0042716	0.250607	0.368356	-0.0702026	4.72126e-07	3.29629e-05	-0.332629	0.00300196	0.00621431	0.340191	0.579303	0.726376	0.0235177
SEMA3C_E49_R	Y	SEMA3C	NM_006379.2	0.5566	0.638489	0.0320441	0.103598	0.325734	-0.0122695	0.0403384	0.0858169	-0.0384863	0.0400171	0.0677688	-0.0501414	6.56067e-07	9.78368e-06	-0.0884279	0.637551	0.778106	-0.0286189
SEMA3C_P642_F	N	SEMA3C	NM_006379.2	0.000813451	0.00302533	0.12482	0.112461	0.340175	0.103171	0.0198252	0.0470656	0.0885034	0.0231334	0.0419019	0.124449	0.00154201	0.00355636	0.220892	0.853697	0.917619	0.0129272
SEMA3F_E333_R	Y	SEMA3F	NM_004186.2	0.0273249	0.0601948	0.156032	0.191519	0.422756	0.0968034	0.212469	0.323763	-0.0526731	0.134508	0.191478	-0.097502	0.406587	0.471335	0.0281541	0.59289	0.736461	0.0285021
SEMA3F_P692_R	Y	SEMA3F	NM_004186.2	2.81778e-16	8.48649e-15	0.689716	0.00973747	0.0767013	-0.0243075	0.228151	0.342227	0.0512253	0.0172071	0.0327106	-0.0186765	0.781702	0.817912	0.0120838	0.494084	0.659476	-0.014395
SEPT5_P441_F	Y	2012-09-05	NM_001009939.1	3.46406e-09	4.12465e-08	0.481832	0.0056567	0.0546459	-0.084109	0.572109	0.663715	-0.0294427	8.3671e-06	0.000147723	-0.156043	0.0445414	0.0674709	0.127034	0.422613	0.599938	0.031097
SEPT5_P464_R	Y	2012-09-05	NM_001009939.1	9.62052e-06	5.55531e-05	0.317633	0.0014623	0.0200543	-0.1822	0.156089	0.2556	-0.0806636	0.000604537	0.00233896	-0.199738	0.00825599	0.0150073	0.213001	0.045692	0.105966	0.121154
SEPT9_P374_F	Y	2012-09-09	NM_006640.2	0.881258	0.918995	-0.0105893	1.55381e-07	1.03767e-05	-0.35098	0.0263389	0.0594949	0.181169	0.408961	0.493065	0.078232	0.0011332	0.00278496	0.176142	0.0588612	0.129528	-0.170332
SEPT9_P58_R	Y	2012-09-09	NM_006640.2	0.0148294	0.0366205	0.110367	1.57442e-06	7.17069e-05	-0.401878	0.806074	0.852119	-0.0180959	0.126929	0.182038	-0.123093	0.000412966	0.00129717	0.113481	0.457218	0.627603	-0.0640104
SERPINA5_E69_F	N	SERPINA5	NM_000624.3	1.67088e-06	1.14575e-05	-0.305365	0.182835	0.411444	-0.0636957	0.432365	0.545696	-0.043653	0.823259	0.864929	0.0162039	0.163631	0.215555	0.0429288	0.039018	0.0936432	0.0579367
SERPINA5_P156_F	N	SERPINA5	NM_000624.3	0.0168645	0.0405382	0.166981	0.554826	0.728003	0.0485959	0.32917	0.447438	0.0356269	0.0502598	0.0818655	0.0726658	0.00135511	0.00321212	0.255792	0.525783	0.684983	0.0523423
SERPINB2_P939_F	N	SERPINB2	NM_002575.1	0.00708369	0.0193146	-0.143834	0.0692113	0.264449	-0.108995	0.0830012	0.153602	0.0179567	0.552757	0.625209	-0.0108949	0.222059	0.281654	-0.118894	0.418797	0.595622	-0.0691608
SERPINB5_P19_R	Y	SERPINB5	NM_002639.2	0.101557	0.174682	-0.0818207	0.921895	0.961048	0.00163493	0.30357	0.425441	-0.012806	0.943704	0.959318	-0.00105755	2.96644e-05	0.000184472	0.0746364	0.0281845	0.0727588	0.0489214
SERPINE1_E189_R	Y	SERPINE1	NM_000602.1	2.63237e-05	0.000138946	0.347273	0.0244495	0.143887	-0.0734867	0.444383	0.557202	-0.0410898	3.6541e-06	9.67136e-05	-0.192087	0.762417	0.801555	-0.0151297	0.112446	0.219184	-0.0513647
SERPINE1_P519_F	N	SERPINE1	NM_000602.1	5.83841e-12	1.06759e-10	0.442531	0.0740792	0.274845	-0.113278	8.21116e-08	2.57395e-06	0.420601	0.00909453	0.019196	-0.12765	0.710832	0.75822	0.0281516	0.759688	0.864648	-0.0196554
SEZ6L_P249_F	Y	SEZ6L	NM_021115.3	0.997124	0.997774	1.73084e-05	0.197872	0.431109	0.00484352	0.000724227	0.0030311	-0.0140776	0.00435456	0.0106506	-0.0169256	0.00106594	0.00265363	-0.0448717	0.00286692	0.0107069	-0.037025
SEZ6L_P299_F	Y	SEZ6L	NM_021115.3	0.441654	0.536269	0.011557	0.603116	0.764977	0.00359184	2.09338e-05	0.000188037	-0.0330317	0.000611506	0.00235081	-0.0384821	0.00015105	0.000612172	-0.04779	4.97363e-06	5.02598e-05	-0.043323
SFN_E118_F	Y	SFN	NM_006142.3	0.0215047	0.0495221	0.0169401	0.674404	0.820512	-0.0118334	0.499729	0.604397	0.00368366	0.505819	0.581541	0.00625622	1.29814e-05	9.92009e-05	0.0823073	0.167845	0.300827	0.0431044
SFN_P248_F	N	SFN	NM_006142.3	0.513867	0.598861	0.0609441	0.273845	0.495984	-0.0849057	0.0497344	0.102402	0.127537	0.45941	0.54156	0.0565732	2.76442e-06	2.88853e-05	0.415897	0.377494	0.558066	-0.0475301
SFRP1_E398_R	Y	SFRP1	NM_003012.3	0.284981	0.385326	-0.00394116	0.544186	0.720577	-0.00199665	0.0277	0.0620221	-0.0148442	0.00836393	0.0179427	-0.0252164	1.28927e-06	1.65027e-05	-0.0445343	0.592118	0.736461	0.0280049
SFRP1_P157_F	Y	SFRP1	NM_003012.3	0.74285	0.805234	-0.0014066	0.268813	0.494969	-0.00380496	0.000150545	0.000850138	-0.0227223	0.00614658	0.0140048	-0.0241812	0.00023865	0.000842287	-0.0320236	0.209178	0.358591	0.0994169
SFTPA1_E340_R	N	SFTPA1	NM_005411.3	0.0204454	0.0474382	-0.141285	0.0790533	0.286382	-0.0882078	0.371179	0.485066	-0.0540644	0.00546416	0.0127941	-0.232496	0.701955	0.749272	-0.0271292	0.60045	0.743183	-0.0277249
SFTPA1_P421_F	N	SFTPA1	NM_005411.3	0.00997382	0.025878	-0.0978818	0.101906	0.32409	-0.110529	0.85047	0.889865	-0.00248	0.31899	0.402604	-0.051234	0.520437	0.58011	0.0390451	0.379611	0.560656	-0.0791352
SFTPB_P689_R	N	SFTPB	NM_000542.2	0.0011183	0.00400398	-0.168126	0.13399	0.370825	-0.0471643	0.960019	0.970125	0.00125816	0.690461	0.750118	-0.0184302	1.52558e-05	0.000113752	0.294512	0.0445786	0.103904	0.16483
SFTPC_E13_F	N	SFTPC	NM_003018.2	4.26744e-05	0.000213511	-0.24183	0.0185801	0.11941	-0.189698	0.0229948	0.0535963	-0.0361778	0.0632661	0.0995916	-0.104166	0.000168931	0.000663626	0.159245	0.0012537	0.0050676	0.1292
SFTPD_E169_F	N	SFTPD	NM_003019.4	0.00345936	0.0106913	-0.0696316	0.0920471	0.311117	-0.0873646	0.536463	0.633851	-0.0182345	0.660047	0.723649	-0.0165178	7.74357e-06	6.87522e-05	0.117548	0.00309393	0.0113419	0.0972089
SGCE_E149_F	Y	PEG10	XM_940371.1	0.0280694	0.0616804	0.13674	0.118495	0.350015	-0.0177334	0.000442754	0.00202352	-0.0346115	0.000703988	0.0025443	-0.0457528	0.809565	0.841334	0.0111957	0.552894	0.707704	-0.0230928
SGCE_P250_R	Y	PEG10	XM_940371.1	0.128646	0.210887	-0.032113	0.658864	0.808319	-0.0137365	0.438589	0.551287	-0.0201408	0.0462128	0.0767382	0.0323111	0.18109	0.236325	0.0564974	0.0113035	0.0340141	0.0808338
SH3BP2_E18_F	N	SH3BP2	NM_003023.2	6.28775e-13	1.39971e-11	0.487884	0.0578333	0.238155	-0.0993113	0.77225	0.828914	-0.0204806	2.073e-05	0.000274494	-0.218923	0.405022	0.470172	0.0960701	0.0113388	0.0340141	-0.234819
SH3BP2_P771_R	Y	SH3BP2	NM_003023.2	0.00045308	0.00182659	0.214086	0.766431	0.879849	-0.00667289	0.0157561	0.038909	-0.0904709	0.000446464	0.00187882	-0.147211	0.000386587	0.00123195	0.388823	0.380844	0.560942	0.06438
SHB_P473_R	Y	SHB	NM_003028.1	0.000128572	0.000589929	0.438875	0.157773	0.389546	-0.00579761	0.0104691	0.0275823	0.164933	0.00133065	0.00415422	-0.00723509	0.00194925	0.00433919	-0.0216017	0.727774	0.84374	-0.00689711
SHB_P691_R	Y	SHB	NM_003028.1	6.9599e-09	7.80321e-08	0.548294	1.46537e-06	7.03376e-05	-0.0860437	4.35194e-07	9.4149e-06	0.386459	0.386543	0.471634	-0.0132539	0.0398599	0.0611636	0.125081	0.481626	0.651213	0.0475185
SHH_E328_F	Y	SHH	NM_000193.2	0.210182	0.303992	-0.0509421	0.414251	0.626269	-0.040728	0.305017	0.426504	-0.0556425	0.0017573	0.00512185	-0.139878	0.531049	0.588522	-0.0201685	0.563952	0.712947	0.0297247
SHH_P104_R	Y	SHH	NM_000193.2	0.265767	0.36448	0.00536638	0.319484	0.53926	0.0118174	0.141036	0.237014	-0.0267387	0.0476266	0.0784078	-0.0387447	0.000983731	0.00250582	-0.0490249	5.63515e-05	0.000346223	-0.0437647
SIN3B_P514_R	Y	SIN3B	NM_015260.1	0.029006	0.0633759	-0.130062	0.00520945	0.0509664	-0.167663	0.838089	0.879811	-0.00796016	0.00590858	0.013629	-0.25292	0.557938	0.61492	-0.0503577	0.167499	0.300826	0.0651508
SIN3B_P607_F	Y	SIN3B	NM_015260.1	0.524582	0.609126	-0.00756573	0.478081	0.674058	-0.0158326	0.00122192	0.00457773	0.0454417	5.86903e-07	3.91949e-05	0.0775791	0.366258	0.434755	0.0523695	0.818265	0.902895	0.0113924
SKI_E465_R	Y	SKI	NM_003036.1	0.173864	0.264936	0.00431522	0.282027	0.503128	0.00440597	0.00129932	0.00482067	-0.0116021	0.000190948	0.00104749	-0.0174266	9.26428e-05	0.00042218	-0.0460246	5.38229e-07	1.07366e-05	-0.0441123
SLC14A1_E295_F	N	SLC14A1	NM_015865.1	0.579058	0.657865	-0.0177802	0.155836	0.389546	-0.0694877	0.41712	0.53214	-0.0363558	0.00571974	0.0132512	-0.151484	0.396639	0.461894	0.0429877	0.963125	0.973263	0.00306774
SLC14A1_P369_R	N	SLC14A1	NM_015865.1	0.16593	0.256855	0.0435118	0.017557	0.115146	-0.182516	0.804062	0.851164	0.00381184	0.0788296	0.12036	0.0254835	0.796995	0.831082	-0.0257065	0.11942	0.228714	0.137265
SLC22A18_P216_R	N	SLC22A18	NM_002555.3	0.0692412	0.126612	-0.069687	0.0916422	0.311117	-0.0958362	0.0097047	0.0257897	-0.0756257	0.000425099	0.00182389	-0.112089	0.00373547	0.00746122	-0.282034	0.921796	0.955008	0.00682039
SLC22A18_P472_R	N	SLC22A18	NM_002555.3	0.00197025	0.00656466	-0.185565	0.177489	0.4069	-0.0346503	0.00434163	0.0131793	-0.0633102	0.372266	0.459278	-0.0181851	0.00502445	0.00969542	0.0598254	0.00673864	0.0220224	0.0476311
SLC22A2_E271_R	Y	SLC22A2	NM_153191.1	0.0461065	0.0910278	-0.107879	0.205473	0.439354	-0.0253439	0.0512179	0.105034	-0.067096	0.00882824	0.0188074	-0.193463	0.00103617	0.00260077	0.0406203	0.0044107	0.0154642	0.0345388
SLC22A2_P109_F	Y	SLC22A2	NM_153191.1	0.173859	0.264936	0.0835453	0.997267	0.998567	-0.000278208	0.0264297	0.0596123	-0.0691037	0.0579718	0.0924959	-0.0961076	8.74923e-05	0.000404784	0.210915	8.84756e-07	1.5506e-05	0.202612
SLC22A3_E122_R	Y	SLC22A3	NM_021977.2	0.012961	0.0329059	0.139499	0.525324	0.710703	-0.00797274	0.00128798	0.00479016	-0.048034	0.0222481	0.0405375	-0.0503901	0.267034	0.33158	-0.0507824	0.837499	0.910402	-0.0137382
SLC22A3_P528_F	Y	SLC22A3	NM_021977.2	0.00478127	0.013962	0.139089	0.0461915	0.213064	0.116051	0.0011956	0.00451214	0.149365	0.975143	0.981362	-0.0011558	2.7403e-06	2.88294e-05	0.319291	0.0838305	0.171914	0.0993662
SLC22A3_P634_F	Y	SLC22A3	NM_021977.2	0.451296	0.54539	0.0139225	0.182242	0.411444	0.0300982	0.00302114	0.00974889	0.174367	0.378791	0.464715	0.0669611	0.000219002	0.000802833	0.198955	3.1212e-05	0.000211538	0.168812
SLC38A4_P45_R	Y	SLC38A4	NM_018018.2	3.72663e-19	1.63546e-17	0.666242	0.366657	0.583612	0.0543182	0.192865	0.300446	0.074908	0.0001748	0.000981318	-0.146231	0.00705706	0.0130756	0.35278	0.0441903	0.103628	0.132547
SLC5A5_E60_F	Y	SLC5A5	NM_000453.1	1.5095e-17	5.15275e-16	0.319858	0.69912	0.840915	-0.0310573	7.82146e-05	0.000515373	0.214158	0.0776652	0.118818	-0.118778	0.00221215	0.00483337	0.300644	0.0460628	0.106235	0.173811
SLC5A8_E60_R	Y	SLC5A8	NM_145913.2	0.0798889	0.140883	-0.0249818	0.623653	0.780806	-0.0114909	0.664763	0.743365	-0.00929327	0.934678	0.952664	-0.00353064	0.0159922	0.0269343	0.325797	0.934921	0.959278	-0.00680638
SLC5A8_P38_R	Y	SLC5A8	NM_145913.2	0.901812	0.931994	-0.00558297	0.701953	0.841685	-0.0137746	0.00257437	0.00855896	-0.0304926	0.001409	0.00429408	-0.0406905	0.0457611	0.0692503	0.162031	0.0865419	0.176532	0.0840219
SLC6A8_P193_R	Y	SLC6A8	NM_005629.1	0.489256	0.576744	-0.0391052	0.270596	0.494969	0.0588989	0.0164606	0.0402852	-0.118745	0.0288826	0.0508758	-0.120313	0.0201442	0.0332784	0.125439	0.871699	0.92673	-0.0133029
SLC6A8_P409_F	Y	SLC6A8	NM_005629.1	0.0088881	0.023417	-0.148754	0.116135	0.348404	-0.0790827	0.000593434	0.00257146	-0.110717	2.61565e-06	8.25923e-05	-0.259671	3.80445e-06	3.74592e-05	-0.293875	0.0173052	0.048241	-0.180441
SLC6A8_seq_28_S227_F	Y	.	.	0.524657	0.609126	0.0573836	0.550494	0.723937	-0.0585683	0.610806	0.697026	-0.0435996	0.894097	0.926051	-0.0133878	0.382523	0.450234	-0.0324794	0.00622755	0.0205269	0.297208
SLIT2_E111_R	Y	SLIT2	NM_004787.1	1.4043e-06	9.94011e-06	0.549925	0.0492027	0.21932	-0.0282076	0.0018243	0.00644166	-0.0392679	0.00384849	0.00951035	-0.0508646	0.00356703	0.00719024	-0.0463253	0.846382	0.914438	-0.00666563
SLIT2_P208_F	Y	SLIT2	NM_004787.1	6.97995e-06	4.13946e-05	0.566526	0.152422	0.387543	-0.0287037	0.00184578	0.00648768	-0.0390548	0.00677224	0.015032	-0.0495106	0.0114581	0.0201599	-0.0337897	0.327674	0.50542	0.0820952
SMAD2_P708_R	Y	SMAD2	NM_005901.3	0.232775	0.328624	0.0171679	0.180783	0.410774	0.00538507	0.225157	0.339393	-0.00717892	3.15027e-05	0.000361105	-0.0198668	0.00120787	0.00293559	-0.0299005	2.90107e-05	0.000199823	-0.0288838
SMAD2_P848_R	Y	SMAD2	NM_005901.3	0.00757324	0.0203365	0.244894	0.461297	0.660347	-0.0239456	0.285221	0.4064	-0.0496954	2.85716e-06	8.28283e-05	-0.13043	0.212014	0.270027	0.113944	0.889605	0.934206	-0.00596637
SMAD4_P474_R	Y	SMAD4	NM_005359.3	0.545537	0.627204	-0.00176251	0.202261	0.435726	0.0049281	0.334222	0.452304	0.00259168	0.00117743	0.00383197	-0.00788296	0.00453019	0.00886673	-0.022394	0.0212982	0.057595	-0.01524
SMARCA3_E20_F	Y	SMARCA3	NM_139048.1	0.503178	0.590437	0.00389224	0.396715	0.612416	0.00474592	3.2595e-05	0.000259409	-0.0149613	0.00485523	0.0116659	-0.0149279	4.97515e-07	7.87817e-06	-0.0378751	9.91627e-09	5.43978e-07	-0.0349618
SMARCA3_P109_R	Y	SMARCA3	NM_139048.1	0.80373	0.8597	0.00167346	0.0639048	0.250722	-0.00816929	7.38022e-06	8.45971e-05	-0.0251534	0.000302213	0.00141094	-0.0277607	0.000822659	0.00214899	-0.0595836	1.81317e-05	0.000136521	-0.0570358
SMARCA3_P17_R	Y	SMARCA3	NM_139048.1	0.190562	0.283352	0.0140139	0.514942	0.701878	0.00704575	2.19553e-08	1.08785e-06	-0.066052	5.46928e-05	0.000480047	-0.067844	0.000364968	0.0011679	-0.0772267	0.0268962	0.0699027	-0.0591619
SMARCA4_P362_R	Y	SMARCA4	NM_003072.2	0.867961	0.910026	0.000557509	0.428584	0.634537	0.00234518	0.00254361	0.00848882	-0.00942293	0.000358411	0.00159681	-0.0145427	0.000846474	0.0022037	-0.0404954	1.00237e-06	1.67346e-05	-0.042855
SMARCB1_P220_R	Y	SMARCB1	NM_003073.3	0.0792562	0.140089	-0.0557956	0.443019	0.643782	-0.0296529	0.841883	0.881693	0.00851012	0.708934	0.76523	0.0231887	0.386943	0.454044	0.0464814	0.321441	0.498218	0.0593097
SMO_E57_F	Y	SMO	NM_005631.3	0.958436	0.968708	-0.000153766	0.458032	0.6578	0.00353362	0.00048575	0.00218162	-0.0152263	2.39908e-05	0.000299592	-0.024978	0.000541961	0.00155599	-0.0529826	0.000707029	0.00310285	-0.0432056
SMO_P455_R	Y	SMO	NM_005631.3	0.0744115	0.133344	0.0134879	0.394227	0.609802	0.00574136	0.000387995	0.00182251	0.273436	0.690539	0.750118	0.0142876	0.0494467	0.0743152	0.177278	0.000137804	0.000737514	-0.0873957
SNCG_E119_F	N	SNCG	NM_003087.1	0.0112186	0.0288638	0.109167	0.0149042	0.102658	-0.170362	0.277163	0.398017	0.0664283	0.106416	0.156716	0.109531	0.416411	0.480186	0.0448519	0.384479	0.56567	0.068663
SNCG_P53_F	Y	SNCG	NM_003087.1	1.81005e-08	1.84122e-07	0.41331	0.0414564	0.202149	-0.114465	0.0671675	0.129773	0.128485	0.485104	0.562737	-0.040976	0.0188499	0.0313011	-0.128711	0.473024	0.643547	0.0488137
SNCG_P98_R	Y	SNCG	NM_003087.1	6.06051e-11	9.21678e-10	0.318079	0.0343553	0.181339	-0.119203	0.0179682	0.0433268	0.13623	0.441839	0.524711	0.0486787	0.0226418	0.0368799	-0.0860233	0.010643	0.0326954	0.220544
SNRPN_E14_F	N	SNRPN	NM_022806.2	0.00361538	0.0111287	-0.136493	0.0426152	0.204553	-0.167123	0.159777	0.260805	-0.0390723	0.019544	0.0362182	-0.141335	0.174263	0.227996	-0.12284	0.257736	0.421599	0.0606897
SNRPN_P230_R	N	SNRPN	NM_022806.2	0.03563	0.0748794	-0.0813675	0.183403	0.411444	-0.0609059	0.0434808	0.0911139	-0.051373	0.019192	0.0357754	-0.130369	0.00857748	0.0155549	0.0765008	0.824466	0.903267	0.0121265
SNRPN_seq_12_S127_F	Y	SNURF	NM_005678.3	0.220769	0.316326	-0.0615588	0.214706	0.443615	-0.0843338	0.0116329	0.0302338	-0.0822483	0.00151249	0.00454636	-0.180849	0.00710704	0.0131365	-0.185552	0.00391259	0.0139114	-0.177765
SNRPN_seq_18_S99_F	Y	SNURF	NM_005678.3	0.0047462	0.013886	-0.123638	0.159318	0.389546	-0.0941613	0.00737889	0.020319	-0.0697863	0.000977846	0.0032938	-0.233432	0.729919	0.774814	-0.0165418	0.518908	0.680069	0.0248589
SNURF_E256_R	Y	SNURF	NM_005678.3	0.00184848	0.00624016	-0.169882	0.169738	0.399874	-0.114195	0.00895828	0.0239163	-0.115282	0.00896785	0.0189995	-0.1473	0.00777673	0.0142203	-0.198861	0.469282	0.640157	-0.0505551
SNURF_P2_R	Y	SNURF	NM_005678.3	0.0565525	0.107506	-0.0835753	0.231788	0.460764	-0.0708605	0.000127883	0.000755491	-0.121239	0.00205932	0.00574067	-0.127758	0.384412	0.451766	-0.0378609	0.549467	0.703905	-0.0298178
SNURF_P78_F	Y	SNURF	NM_005678.3	0.00275747	0.00880557	-0.126592	0.361855	0.578969	-0.0606431	0.000421376	0.00196131	-0.161894	0.00111009	0.00365117	-0.232719	0.0154963	0.0261852	-0.135137	0.23308	0.390842	-0.0807415
SOD3_P225_F	N	SOD3	NM_003102.1	0.896605	0.930531	-0.000770162	0.277431	0.499296	-0.0144437	0.785893	0.838285	-0.00235499	0.144861	0.203761	0.0126316	0.00126367	0.00303756	0.0504388	0.367159	0.548063	-0.0420869
SOD3_P460_R	N	SOD3	NM_003102.1	0.630913	0.708912	0.00711174	0.137187	0.376284	-0.117481	0.474121	0.584002	-0.0181178	0.335772	0.421016	0.0280651	1.62774e-05	0.000118736	0.203902	0.0055455	0.018598	0.112732
SOX17_P287_R	Y	SOX17	NM_022454.2	0.630342	0.708789	0.0210871	0.482443	0.67736	0.03103	0.0188806	0.0451723	-0.0422485	0.00567457	0.0131863	-0.0670168	0.0565201	0.0840415	0.239422	0.121553	0.231645	0.119068
SOX17_P303_F	Y	SOX17	NM_022454.2	0.708261	0.77929	-0.00756321	0.853758	0.932031	0.00394128	1.43919e-08	8.56466e-07	-0.0763676	6.36332e-06	0.000119196	-0.0809622	0.139559	0.187476	0.146469	0.9089	0.948698	-0.00556679
SOX1_P1018_R	Y	SOX1	NM_005986.2	0.247855	0.344529	-0.00407004	0.49361	0.68552	0.00292333	0.117678	0.203977	-0.00944143	7.50733e-05	0.000573695	-0.0256221	0.00053355	0.00154629	-0.0377357	0.00304463	0.0111879	-0.028566
SOX1_P294_F	Y	SOX1	NM_005986.2	0.119163	0.19895	-0.0159412	0.431006	0.635947	-0.011814	0.00357457	0.0112563	-0.0412393	0.0181161	0.0341513	-0.0475453	8.60793e-06	7.34543e-05	-0.0915777	9.3552e-06	8.14601e-05	-0.076755
SOX2_P546_F	Y	SOX2	NM_003106.2	0.0299232	0.0646513	0.175256	0.0737469	0.274845	-0.0212294	6.83035e-05	0.000470784	0.277392	0.0176187	0.033341	0.231673	2.4973e-05	0.000160496	-0.0630816	2.64308e-05	0.000184535	-0.054883
SPARC_E50_R	Y	SPARC	NM_003118.2	0.333571	0.432741	0.0247476	0.214279	0.443615	-0.0122832	0.0736502	0.139401	0.0931036	0.242642	0.31719	-0.0345737	0.00118884	0.00289946	-0.108484	1.56733e-05	0.000120371	-0.107974
SPARC_P195_F	N	SPARC	NM_003118.2	0.182129	0.275074	0.0972153	0.00181128	0.0237788	-0.0716043	0.000722497	0.0030311	0.239323	0.122826	0.177146	0.0838501	0.654736	0.705737	0.0233804	0.0702883	0.148914	-0.068418
SPDEF_E116_R	N	SPDEF	NM_012391.1	0.881965	0.919063	0.009847	0.839124	0.921985	0.0156246	0.744542	0.807069	0.0135571	0.444719	0.527482	-0.0514065	1.61215e-05	0.000118481	0.254629	0.576695	0.725141	-0.0340914
SPDEF_P6_R	N	SPDEF	NM_012391.1	0.384881	0.482158	-0.0695123	0.00353736	0.0385648	-0.2481	0.0358441	0.0775443	-0.0873545	0.220481	0.290944	-0.0364073	0.000537461	0.00154886	0.251555	0.937075	0.960068	-0.00566643
SPI1_E205_F	Y	SPI1	NM_003120.1	6.02127e-07	4.53366e-06	-0.298186	0.219071	0.444919	-0.0770206	0.969344	0.977686	-0.00171283	0.579904	0.650645	-0.0272887	0.00215299	0.00472428	0.204792	0.51585	0.677798	0.0489761
SPI1_P48_F	N	SPI1	NM_003120.1	0.0421608	0.0848742	-0.0454172	0.247315	0.477889	-0.049792	0.916888	0.940147	-0.0023105	0.325605	0.409942	-0.0642929	0.0109209	0.0193064	0.243608	0.00519799	0.0175861	0.192502
SPI1_P929_F	N	SPI1	NM_003120.1	1.22631e-07	1.09512e-06	-0.414874	0.0329219	0.179246	-0.131949	0.0148414	0.0370672	-0.0893802	0.00425726	0.0104293	-0.158229	0.0572881	0.0849368	-0.162851	0.0772295	0.16052	0.0832242
SPP1_E140_R	N	SPP1	NM_000582.2	0.514937	0.599654	0.0392193	0.0784263	0.284782	-0.161326	2.52261e-05	0.000215263	-0.236127	3.67493e-05	0.000397513	-0.319257	0.0297363	0.0468461	0.195367	0.517257	0.679065	0.0557931
SPP1_P647_F	N	SPP1	NM_000582.2	1.61539e-07	1.36923e-06	-0.404832	0.00520385	0.0509664	-0.25111	0.479763	0.590005	0.0367028	0.308564	0.390407	-0.0694098	0.0312194	0.0490168	-0.211989	0.852361	0.916825	-0.0114306
SRC_E100_R	N	SRC	NM_198291.1	0.381641	0.479706	0.0193497	0.309418	0.532213	0.0273749	0.0520251	0.106264	0.025375	0.00967228	0.0201582	0.0455147	4.03096e-05	0.000229317	0.144918	0.00119684	0.00486333	0.120186
SRC_P164_F	N	SRC	NM_198291.1	0.978084	0.982562	-0.000228736	0.518657	0.70563	-0.013087	0.0215171	0.0505356	0.0233637	0.00550449	0.012869	0.0347651	0.795248	0.830388	-0.0205835	9.04221e-05	0.000516313	0.101919
SRC_P297_F	N	SRC	NM_198291.1	0.532769	0.616215	0.00349376	0.956823	0.973943	0.000578855	0.089728	0.16383	0.00521184	0.000498152	0.00205689	0.01223	1.50225e-06	1.86085e-05	0.102111	0.000945634	0.00396856	0.0818148
ST6GAL1_P164_R	Y	ST6GAL1	NM_173216.1	0.139921	0.22481	-0.0194487	0.89795	0.948591	-0.00414182	0.3478	0.464136	0.0161007	0.376689	0.463246	-0.0162319	0.0694517	0.100734	0.18093	0.838265	0.91052	0.0128879
ST6GAL1_P528_F	Y	ST6GAL1	NM_173216.1	0.0964194	0.166968	0.126832	0.0211124	0.129198	-0.0209862	0.468855	0.578908	0.0321921	0.0237467	0.0429116	-0.0437133	0.00142459	0.00333563	0.386652	0.302531	0.478177	0.0979295
STAT5A_E42_F	N	STAT5A	NM_003152.2	2.43757e-09	2.97152e-08	0.500446	0.0966595	0.316565	-0.108874	4.05643e-07	8.90097e-06	0.384982	0.165507	0.227999	0.12578	0.00710673	0.0131365	0.298913	0.817603	0.902895	-0.0226326
STAT5A_P704_R	N	STAT5A	NM_003152.2	0.0579834	0.109548	0.042066	0.0420647	0.203668	-0.183885	0.689001	0.763018	0.010832	0.0315629	0.0549044	0.0562916	0.444768	0.506625	0.0742321	0.45314	0.625089	-0.0647811
STK11_P295_R	Y	STK11	NM_000455.4	0.146859	0.232791	0.0189407	0.540784	0.717861	-0.00948218	4.22394e-06	5.31801e-05	-0.0949443	0.00031637	0.00145492	-0.108764	1.23586e-05	9.6851e-05	-0.106406	0.0335973	0.0829669	-0.0595717
STK23_E182_R	Y	STK23	NM_014370.2	0.00134293	0.00476383	0.123538	0.0948561	0.314329	-0.171541	0.669043	0.745214	-0.0443064	0.615852	0.683563	-0.0547373	0.0141088	0.0241327	0.316048	0.000602573	0.00270317	0.389311
STK23_P24_F	Y	STK23	NM_014370.2	0.64489	0.721975	-0.0413741	0.149455	0.38647	-0.143229	0.36586	0.479489	-0.0886994	0.213703	0.283217	-0.119621	0.22378	0.283602	0.123578	0.00233685	0.00888467	0.313372
SYBL1_E23_R	Y	SYBL1	NM_005638.3	0.183779	0.276478	-0.0992203	0.144905	0.382999	-0.139894	0.350793	0.466106	-0.0562423	0.482958	0.56179	-0.0572662	0.187394	0.242696	-0.156724	0.648855	0.786615	-0.0400563
SYBL1_P349_F	Y	SYBL1	NM_005638.3	0.334431	0.433124	-0.0756142	0.158297	0.389546	-0.112425	0.0542228	0.109732	-0.0830057	0.000267721	0.00129722	-0.169863	0.0139711	0.023981	-0.112078	0.152488	0.278386	0.128606
SYK_E372_F	Y	SYK	NM_003177.3	2.33805e-07	1.87044e-06	0.475018	0.760118	0.878091	-0.00629731	0.335978	0.45388	0.0217913	9.67152e-05	0.000681443	-0.0224677	3.11645e-07	5.56612e-06	0.573389	0.273046	0.441438	0.037857
SYK_P584_F	N	SYK	NM_003177.3	0.692821	0.764236	0.0192406	0.917859	0.959821	0.00407946	0.860192	0.896253	0.00922333	0.306551	0.388321	-0.0725375	7.32113e-08	1.60646e-06	0.29531	0.49087	0.659476	0.0503281
TAL1_E122_F	Y	TAL1	NM_003189.1	0.00106968	0.00383887	0.229449	0.191601	0.422756	0.0779705	0.210539	0.32146	-0.0215528	0.0064752	0.0144839	-0.0619843	0.00402387	0.00798535	0.350663	0.0651098	0.140462	0.146259
TAL1_P594_F	Y	TAL1	NM_003189.1	0.00202657	0.00670864	0.281245	0.35304	0.57021	0.0668658	0.70217	0.77413	-0.0229718	0.00362063	0.00908706	-0.0822154	0.000797036	0.00210352	0.468423	0.0200147	0.0544117	0.227641
TAL1_P817_F	Y	TAL1	NM_003189.1	0.278498	0.379568	0.0739946	0.726911	0.858213	-0.0329014	0.657009	0.73868	-0.0238203	0.0856953	0.129811	-0.101655	0.00213215	0.00469196	0.296513	0.604102	0.7453	0.049019
TBX1_P520_F	N	TBX1	NM_080646.1	0.144088	0.229739	0.0983992	0.00675879	0.0607105	-0.183409	0.00333565	0.0106519	-0.150611	4.89213e-06	0.000105835	-0.329944	0.356708	0.426052	0.0901947	0.433039	0.608553	0.0721655
TBX1_P885_R	Y	TBX1	NM_080646.1	1.00021e-05	5.754e-05	0.512771	0.0014155	0.0198372	-0.110098	0.00709421	0.0196337	-0.0859608	0.0374181	0.0639313	-0.0952232	0.0871866	0.122524	0.0910683	0.182464	0.320068	0.0961354
TCF4_P175_R	Y	TCF4	NM_003199.1	0.0579416	0.109548	0.160136	0.0268256	0.154322	0.0087398	0.000197327	0.00105241	-0.0212733	4.18187e-05	0.000415217	-0.035931	0.00891962	0.0160993	-0.02225	0.17505	0.31112	-0.0138552
TCF4_P317_F	Y	TCF4	NM_003199.1	0.000544256	0.0021164	0.355036	0.151787	0.387543	-0.0466838	0.000110351	0.000683463	-0.0802383	0.00110263	0.00364223	-0.0894861	0.0992553	0.137969	-0.0557673	0.531433	0.688845	-0.0272901
TCF7L2_E411_F	Y	TCF7L2	NM_030756.1	0.476436	0.564368	0.00342086	0.205947	0.439354	0.00690795	8.32769e-07	1.55992e-05	-0.0343143	0.000137421	0.000847704	-0.038276	0.000889531	0.00228482	-0.0364474	0.000406466	0.00190927	-0.0308598
TCF7L2_P193_R	Y	TCF7L2	NM_030756.1	0.529877	0.614722	0.00368369	0.781836	0.892199	0.000935233	0.604738	0.692675	0.0120546	0.003147	0.00805633	-0.0141072	0.000273115	0.00093818	-0.0370626	3.53456e-06	3.96283e-05	-0.0363219
TDGF1_E53_R	Y	TDGF1	NM_003212.1	0.106495	0.18236	-0.0987698	0.456067	0.656251	-0.0481288	1.15208e-05	0.000116421	0.208211	0.051379	0.0829844	-0.133203	7.65251e-05	0.000370797	0.240748	0.00516129	0.0175005	0.176056
TDGF1_P428_R	N	TDGF1	NM_003212.1	8.90656e-05	0.000418363	-0.182758	0.924338	0.961048	-0.006257	0.0203258	0.0481055	-0.112529	0.000344909	0.00155958	-0.200572	0.000431829	0.00133459	0.305505	0.189091	0.330801	0.0844154
TDG_E129_F	Y	TDG	NM_001008411.1	0.00103243	0.00374895	-0.129844	0.0877683	0.302269	-0.0786888	0.00160495	0.00581415	-0.120603	0.0110056	0.022243	-0.0914605	0.527098	0.585411	-0.0357551	0.273312	0.441438	-0.0758873
TEK_E75_F	N	TEK	NM_000459.1	0.779852	0.837074	0.0177858	0.000433913	0.00803	-0.338455	0.407769	0.52238	0.0457313	0.00886172	0.0188526	-0.235767	1.92652e-05	0.000131517	0.36132	0.618708	0.75966	0.0514198
TEK_P479_R	N	TEK	NM_000459.1	0.0428594	0.0857488	0.0760936	0.347267	0.568456	0.052864	0.0027417	0.0089984	-0.113753	0.00870965	0.0186064	-0.145552	0.0917559	0.127892	0.116485	0.407879	0.58806	-0.0591974
TEK_P526_F	N	TEK	NM_000459.1	0.00263805	0.00853063	0.10522	0.434221	0.635947	0.0425054	0.40648	0.521163	-0.0435522	0.162435	0.224371	-0.0943507	0.0187826	0.0312568	0.161807	0.130495	0.246098	0.11649
TERT_E20_F	Y	TERT	NM_198255.1	0.242248	0.338574	0.0227453	0.887625	0.941897	0.000699502	0.00218337	0.00748584	-0.0179892	1.78515e-05	0.000251325	-0.0293657	0.0382178	0.0587613	0.0973793	0.843106	0.912622	-0.00581275
TERT_P360_R	Y	TERT	NM_198255.1	0.983523	0.985447	0.00038891	0.588282	0.753629	0.0142016	0.192695	0.300446	-0.0124864	0.623041	0.688483	0.00899875	0.00455156	0.00888334	0.347894	0.492739	0.659476	-0.026397
TESK2_P252_R	Y	TESK2	NM_007170.1	0.849414	0.894856	0.000661333	0.221824	0.448317	0.00657477	0.0113724	0.0296068	-0.0154982	0.0126928	0.0251563	-0.0234292	0.157234	0.208199	0.099955	0.0034751	0.012589	-0.0354099
TES_E172_F	Y	TES	NM_015641.2	0.479562	0.567058	0.0342363	0.506427	0.69577	-0.00985052	0.00246833	0.0082987	-0.0188762	0.00333751	0.00845943	-0.0254978	0.173714	0.227472	0.103033	0.246697	0.407448	0.105197
TES_P182_F	Y	TES	NM_015641.2	0.0113435	0.0291166	0.208562	0.129494	0.366736	-0.0354904	0.315654	0.433284	0.0487651	0.665108	0.727639	0.0200724	5.80484e-06	5.37123e-05	0.351544	0.026335	0.0686768	0.170557
TFAP2C_E260_F	Y	TFAP2C	NM_003222.3	0.283564	0.384947	0.00642125	0.553601	0.7274	0.0042859	1.06647e-05	0.000112973	-0.0359598	0.00154799	0.004631	-0.0395398	0.0885356	0.123966	-0.0194487	0.200218	0.347615	0.0578918
TFAP2C_P765_F	Y	TFAP2C	NM_003222.3	0.457203	0.549933	0.0208211	0.000198579	0.00417832	-0.0213302	0.481047	0.590326	0.0111591	0.00786541	0.0170639	-0.0191245	0.00242687	0.00522551	0.421694	0.0285933	0.0733211	0.177515
TFDP1_P543_R	Y	TFDP1	NM_007111.3	0.464465	0.556615	-0.0121103	0.231935	0.460764	-0.0294048	0.0551494	0.110876	0.0355737	0.00230912	0.00631093	0.0569736	2.20698e-06	2.42137e-05	0.205867	0.00336557	0.0122753	0.159896
TFE3_P421_F	Y	TFE3	NM_006521.3	0.155599	0.244126	-0.0977401	0.840769	0.922443	-0.0174712	0.175537	0.281739	-0.0653606	0.108632	0.159064	-0.0973885	0.000302981	0.0010095	-0.0836442	0.0216158	0.0581387	0.238062
TFF1_P180_R	N	TFF1	NM_003225.2	0.00638399	0.017754	-0.168205	0.762833	0.878728	-0.0159086	0.0618971	0.12189	0.0900602	0.0553945	0.088909	0.127171	0.000158881	0.000635524	0.0965174	0.0426658	0.100822	0.0725081
TFF1_P399_R	N	TFF1	NM_003225.2	0.470599	0.561212	-0.0287498	0.326884	0.548137	0.0363915	0.000112978	0.000694135	0.239209	0.00091499	0.0031312	0.282721	0.555952	0.614347	0.0221589	0.562849	0.712726	0.0222168
TFF2_P178_F	N	TFF2	NM_005423.3	0.0821642	0.144398	-0.0942658	0.755882	0.875592	-0.0184064	0.00793206	0.021564	-0.101389	0.312884	0.395222	-0.0508216	0.206546	0.263719	-0.125055	0.768284	0.868774	0.0217125
TFF2_P557_R	N	TFF2	NM_005423.3	0.000656395	0.00247721	-0.217245	0.194576	0.42668	-0.0804667	0.000576639	0.00251624	-0.0888982	0.00332009	0.00842918	-0.184502	0.73912	0.78292	0.00732155	0.116235	0.223731	0.0253251
TFPI2_E141_F	Y	TFPI2	NM_006528.2	0.00709608	0.0193146	0.159675	0.453534	0.654726	0.0168092	0.188796	0.296024	0.0493015	3.90285e-05	0.000407156	-0.0473209	0.803116	0.83633	-0.00621098	0.0360121	0.088221	-0.0335463
TFPI2_P152_R	Y	TFPI2	NM_006528.2	1.83422e-06	1.23569e-05	0.488604	0.927007	0.961048	0.00270465	6.42023e-06	7.47081e-05	0.339972	0.338484	0.423726	0.0619122	0.0262434	0.0417374	0.161631	0.873723	0.92673	-0.00630074
TFPI2_P9_F	Y	TFPI2	NM_006528.2	0.00759567	0.0203612	0.215832	0.150048	0.387021	-0.0133483	0.1093	0.191892	0.0797701	0.0072932	0.0160492	-0.0301385	0.960328	0.964725	-0.00176267	0.0458846	0.106143	-0.0424912
TFRC_P414_R	Y	TFRC	NM_003234.1	0.291627	0.391897	0.0512823	0.823341	0.914133	-0.00250024	0.861167	0.896253	-0.0032512	0.00149941	0.00451586	-0.0635796	0.0488899	0.0735579	0.0563431	0.290397	0.463217	-0.018518
TGFA_P558_F	Y	TGFA	NM_003236.1	0.0134053	0.0337183	0.251869	0.509919	0.699318	-0.00511368	0.00226569	0.00773356	-0.00982809	0.00418937	0.0102794	-0.0122192	5.95154e-05	0.000305738	-0.0296824	1.75961e-06	2.4013e-05	-0.0274515
TGFA_P642_R	Y	TGFA	NM_003236.1	2.79099e-06	1.80015e-05	0.53879	0.940989	0.966427	-0.00251398	0.760092	0.82045	0.00987653	0.0108947	0.0221061	-0.0226187	0.00014243	0.000586754	-0.0589522	0.749099	0.85931	-0.0114371
TGFB1_P833_R	Y	TGFB1	NM_000660.3	0.00860694	0.0227543	0.0203757	0.0516769	0.223746	-0.0757882	0.209151	0.320652	0.00705484	0.196119	0.26332	-0.0351245	0.105141	0.145361	-0.126164	0.00298723	0.0110831	0.159183
TGFB2_E226_R	Y	TGFB2	NM_003238.1	2.11767e-05	0.000114938	0.586455	0.167331	0.396024	-0.0200086	9.01016e-05	0.000578609	0.368535	0.016424	0.0314554	-0.072498	5.39532e-07	8.20516e-06	0.654735	0.111936	0.218745	0.163068
TGFB2_P632_F	Y	TGFB2	NM_003238.1	0.0159669	0.0389908	0.25433	0.866578	0.936709	0.000601764	0.747428	0.809626	0.00853582	0.000230602	0.00117676	-0.0186982	0.000165042	0.000655049	-0.0329574	2.43606e-06	3.09239e-05	-0.0320272
TGFB3_E58_R	N	TGFB3	NM_003239.1	0.351758	0.448382	0.0873457	0.323479	0.544807	-0.076475	0.150068	0.249734	-0.0724349	0.306663	0.388321	-0.0416833	0.000124988	0.000531803	0.26275	0.375187	0.555189	0.0674152
TGFBI_P173_F	Y	TGFBI	NM_000358.1	8.88968e-23	1.36545e-20	0.639089	0.0767299	0.279946	-0.0950739	0.000183677	0.00100401	0.248729	0.414757	0.498487	0.0698041	0.0219281	0.0358314	0.243413	0.604046	0.7453	0.0479322
TGFBI_P31_R	Y	TGFBI	NM_000358.1	3.04078e-21	2.5948e-19	0.724061	0.382828	0.600637	-0.035747	0.87063	0.903061	0.00832805	0.019676	0.0363687	-0.0439736	0.00640463	0.0119678	0.310023	0.188922	0.330801	0.12341
TGFBR3_E188_R	Y	TGFBR3	NM_003243.2	0.185033	0.277821	0.00276031	0.0248281	0.14555	0.00551006	0.000800873	0.00325788	-0.0106172	5.23166e-05	0.000473901	-0.0167032	0.00250576	0.00536052	-0.0260258	0.000215055	0.00108659	-0.0231852
TGFBR3_P429_F	Y	TGFBR3	NM_003243.2	0.170708	0.261423	0.071243	0.145331	0.382999	-0.0096167	0.932524	0.949839	-0.0010716	0.000116453	0.000764406	-0.0225719	1.42567e-05	0.000107874	-0.0345474	4.40215e-08	1.60993e-06	-0.0329361
THBS1_E207_R	Y	THBS1	NM_003246.2	1.81341e-17	5.92638e-16	0.726726	0.00907603	0.0756609	-0.0281183	0.338551	0.456955	0.0381757	0.00317175	0.00810616	-0.0165628	1.20961e-14	1.85796e-12	0.797453	0.0679372	0.145134	0.173473
THBS1_P500_F	Y	THBS1	NM_003246.2	4.85386e-13	1.11277e-11	0.65459	0.0076734	0.0673505	-0.04495	9.17592e-05	0.000582406	-0.021865	0.00264793	0.00695115	-0.0234912	0.643088	0.694643	0.0131525	0.000196955	0.00100841	-0.0490753
THBS2_E129_F	Y	THBS2	NM_003247.2	0.00054684	0.00212108	0.294301	0.957797	0.974289	0.000986951	7.8694e-07	1.49227e-05	-0.183383	4.67619e-05	0.000437965	-0.214052	0.0269606	0.0426923	-0.0422754	0.106742	0.2102	-0.0327017
THBS2_P605_R	N	THBS2	NM_003247.2	0.498655	0.585576	0.0331616	1.01901e-05	0.000333022	-0.446587	0.371379	0.485066	0.0566122	0.0142998	0.0280159	-0.224305	7.65208e-06	6.83349e-05	0.130285	0.695514	0.824313	0.0223211
THPO_E483_F	N	THPO	NM_199228.1	0.466003	0.557896	-0.00885058	0.254649	0.486645	-0.0244864	0.779925	0.833657	-0.00195182	0.206717	0.275144	-0.0253	0.0360248	0.0556681	0.041317	0.355244	0.534956	0.022387
THPO_P585_R	N	THPO	NM_199228.1	0.0963974	0.166968	-0.0116982	0.126354	0.361804	-0.0300207	0.453616	0.565395	0.0070705	0.101438	0.150395	-0.109293	3.21695e-07	5.66836e-06	0.10475	7.94029e-10	7.17429e-08	0.105769
THY1_P149_R	Y	THY1	NM_006288.2	0.00420455	0.0125159	0.260702	3.84841e-07	2.36446e-05	-0.0617357	0.000141543	0.000811233	0.303878	0.416894	0.500663	-0.0319501	0.00041843	0.00129909	-0.107248	0.938892	0.960086	-0.00381289
THY1_P20_R	Y	THY1	NM_006288.2	0.0631324	0.117399	0.109609	0.022204	0.134273	-0.0185856	0.0736939	0.139401	0.0976968	0.000634679	0.00241903	-0.0796421	0.000151638	0.000612937	-0.100217	2.29851e-06	2.99196e-05	-0.0933209
TIAM1_P117_F	Y	TIAM1	NM_003253.1	0.166809	0.257766	0.0123161	0.87844	0.940317	-0.000742845	0.0277912	0.0621358	-0.0185094	0.0768342	0.117782	0.057568	0.726027	0.771749	-0.00419268	0.739479	0.85359	-0.00509475
TIAM1_P188_R	Y	TIAM1	NM_003253.1	0.296767	0.397414	0.00898014	0.642555	0.79594	0.00718919	1.27114e-07	3.6839e-06	-0.109455	0.000308356	0.00142661	-0.107051	0.00623518	0.0117224	-0.0588595	0.0743744	0.156064	-0.0387356
TIE1_E66_R	N	TIE1	NM_005424.2	0.000574589	0.00221751	-0.268424	0.0918631	0.311117	-0.109459	3.50342e-05	0.000274554	-0.236446	8.47732e-05	0.000626018	-0.317048	0.0306118	0.0481267	0.127056	0.00107499	0.00442678	0.170816
TIMP1_E254_R	N	TIMP1	NM_003254.2	0.0306382	0.0660129	-0.199566	0.0943482	0.314329	-0.163166	0.194342	0.302135	-0.11021	0.476199	0.555806	-0.0703354	3.96561e-05	0.000227283	0.512842	0.0308919	0.0781712	0.211195
TIMP1_P615_R	N	TIMP1	NM_003254.2	0.0781825	0.139314	-0.0356218	0.0591236	0.241311	-0.109521	0.0161867	0.0398185	0.0529115	0.895696	0.926701	-0.00611645	0.000127189	0.000538189	0.135569	0.455563	0.625932	0.0391868
TIMP2_E394_R	Y	TIMP2	XM_941104.1	0.0554773	0.105927	0.00478107	0.135314	0.372477	0.00474148	0.00477365	0.0142375	-0.011707	0.00069353	0.00253031	-0.0184682	0.00082191	0.00214899	-0.0264471	0.0257052	0.0672625	-0.0194396
TIMP2_P267_F	Y	TIMP2	XM_941104.1	0.648388	0.724836	-0.00527674	0.106774	0.32999	-0.0144932	0.352537	0.46721	0.0516618	0.00135249	0.00419411	-0.049796	0.00720192	0.0132799	-0.0414897	0.000482563	0.002229	-0.0404485
TIMP3_P1114_R	N	TIMP3	NM_000362.4	0.873949	0.915055	0.000867332	0.118318	0.350015	-0.0393188	0.422245	0.536894	-0.00383117	0.183507	0.248998	-0.0381153	0.000229376	0.000821263	0.0512238	0.169846	0.303353	0.0264545
TIMP3_P690_R	N	TIMP3	NM_000362.4	3.67168e-06	2.29256e-05	0.0305377	0.00888688	0.0754123	-0.167699	0.719888	0.789012	0.00172317	0.000175692	0.000981318	0.0145673	3.13197e-05	0.000191919	0.0527298	4.57256e-07	9.49115e-06	0.0474119
TIMP3_seq_7_S38_F	Y	.	.	0.12831	0.21056	0.0942937	0.71071	0.846318	-0.00239202	0.181027	0.286657	0.0860905	0.0216654	0.0395696	-0.0335174	0.0227147	0.0369595	0.308144	0.495046	0.659646	0.0450113
TJP1_P326_R	Y	TJP1	NM_175610.1	1.5315e-05	8.64845e-05	0.43818	0.054811	0.230931	-0.0119988	0.000125339	0.000746204	-0.0269093	0.00246818	0.00660475	-0.0309596	0.280487	0.346324	-0.0249706	0.439112	0.614276	-0.0350727
TJP1_P390_F	Y	TJP1	NM_175610.1	6.30809e-21	4.71687e-19	0.754696	0.23515	0.46255	-0.0308027	0.104096	0.184206	-0.0116854	9.07973e-06	0.000158331	-0.0277439	6.46249e-08	1.45976e-06	0.674432	0.508285	0.670726	0.0422927
TJP2_P330_R	Y	TJP2	NM_004817.2	0.0822901	0.144431	-0.0174989	0.0333754	0.179876	-0.017069	0.0061209	0.0174106	-0.0128444	0.00266157	0.00696451	-0.020321	0.0100234	0.0179023	-0.0256565	0.00588309	0.0195593	-0.0206399
TJP2_P518_F	Y	TJP2	NM_004817.2	0.235107	0.330713	-0.0671153	1.04328e-05	0.00033385	-0.161076	0.277363	0.398017	0.0487713	0.386688	0.471634	-0.0493658	0.249357	0.311646	0.0686739	0.93946	0.960086	0.00259597
TK1_E47_F	Y	TK1	NM_003258.1	0.334311	0.433124	-0.0128639	0.392879	0.608943	-0.0187082	0.000102679	0.000646372	-0.0482613	4.24408e-05	0.000415217	-0.0704493	0.000551878	0.00157062	-0.0663773	0.00050399	0.00231083	-0.0524824
TK1_P62_R	Y	TK1	NM_003258.1	0.255399	0.353736	0.00468999	0.555007	0.728003	0.00287789	1.84062e-06	2.71845e-05	-0.0233963	4.30142e-05	0.00041793	-0.0273858	0.000564617	0.00159421	-0.0420469	3.00482e-05	0.000206045	-0.0377975
TM7SF3_P1068_R	N	TM7SF3	NM_016551.1	0.072226	0.130979	0.0135005	0.48463	0.677953	-0.0162602	0.435606	0.549254	0.0308193	9.89919e-05	0.000691143	0.0886876	0.000121134	0.000519841	0.127833	0.696959	0.824753	0.0161363
TMEFF1_E180_R	Y	TMEFF1	NM_003692.2	0.343901	0.439997	0.0076608	0.889161	0.941897	-0.000578584	0.000309009	0.00150679	-0.0137143	0.00134788	0.00419097	-0.0147503	3.0974e-06	3.13001e-05	-0.0582709	8.86742e-09	5.04458e-07	-0.0549871
TMEFF1_P234_F	Y	TMEFF1	NM_003692.2	0.732105	0.797527	0.00837168	0.812987	0.909804	-0.00195379	1.09217e-09	1.86398e-07	-0.07339	2.28078e-06	8.25923e-05	-0.0806078	0.00130252	0.00311631	-0.0675635	2.16757e-05	0.000158542	-0.0659884
TMEFF1_P626_R	Y	TMEFF1	NM_003692.2	1.51707e-06	1.0544e-05	0.294389	0.0436539	0.206952	-0.138026	0.052276	0.106635	0.109868	0.0096623	0.0201582	-0.157973	0.0132049	0.0227385	0.258338	0.0329229	0.0818277	0.133128
TMEFF2_E94_R	Y	TMEFF2	NM_016192.2	0.0789209	0.139948	0.147593	0.927262	0.961048	-0.00180015	7.76052e-05	0.0005138	-0.0305455	0.0088925	0.018892	-0.0300753	0.000196161	0.000743958	-0.0570789	3.03434e-06	3.55306e-05	-0.053546
TMEFF2_P152_R	Y	TMEFF2	NM_016192.2	0.0309111	0.0663332	0.178043	0.949887	0.971389	-0.00234442	1.17719e-05	0.000118181	-0.0539837	0.00013214	0.00083183	-0.0649245	1.38326e-06	1.72739e-05	-0.180784	4.25766e-05	0.000269126	-0.159242
TMEFF2_P210_R	Y	TMEFF2	NM_016192.2	0.0391546	0.0802956	0.113571	0.655911	0.805983	0.0108996	2.59551e-05	0.000219049	-0.0741845	0.641881	0.705748	-0.019585	0.0159873	0.0269343	-0.0467454	0.787888	0.881964	0.00698964
TMEM63A_E63_F	Y	TMEM63A	NM_014698.1	0.676192	0.748597	-0.0041167	0.921441	0.961048	-0.00115203	0.509027	0.610832	0.0410874	0.000135266	0.000842051	-0.0843728	0.0119208	0.0208784	-0.0701638	9.38905e-05	0.000530205	-0.0833083
TMPRSS4_E83_F	N	TMPRSS4	NM_019894.2	0.00509435	0.014764	-0.139368	0.324345	0.545668	-0.0303336	0.334099	0.452304	-0.02534	0.254659	0.330368	-0.0284427	0.000141599	0.000586754	0.0911372	5.75693e-05	0.000350899	0.0973208
TMPRSS4_P552_F	N	TMPRSS4	NM_019894.2	1.42222e-06	9.97305e-06	-0.410658	0.00430255	0.0443538	-0.224838	0.00679723	0.0188798	-0.160208	0.0417988	0.0704752	-0.119577	0.0140158	0.0240271	-0.293517	0.150797	0.276401	-0.0988457
TNC_P198_F	Y	TNC	NM_002160.1	9.76883e-21	5.78959e-19	0.674609	0.401467	0.615423	-0.0333004	9.0269e-06	9.9038e-05	-0.104801	0.000156973	0.000913296	-0.133274	0.0433475	0.0657922	-0.130235	0.00670368	0.0219549	-0.12722
TNC_P57_F	Y	TNC	NM_002160.1	7.84991e-20	3.76796e-18	0.663109	0.0613244	0.245298	-0.0150106	2.18919e-05	0.00019437	-0.0309348	0.000393611	0.00171758	-0.0382793	8.14837e-07	1.14825e-05	-0.0654033	3.02815e-09	2.21487e-07	-0.0606067
TNFRSF10A_P171_F	Y	LOC389641	XM_944097.1	6.59614e-19	2.73829e-17	0.606514	0.536765	0.715719	-0.044627	5.61291e-05	0.000404762	0.387855	0.53349	0.608345	0.0248082	2.74028e-12	2.63067e-10	0.612348	0.000998774	0.0041688	0.331191
TNFRSF10A_P91_F	Y	LOC389641	XM_944097.1	3.12618e-20	1.6006e-18	0.621167	0.853379	0.932031	0.0117732	0.00190924	0.00669543	0.239636	0.497449	0.574066	0.01262	1.5437e-09	6.40843e-08	0.621985	0.017358	0.0483006	0.244772
TNFRSF10B_E198_R	Y	TNFRSF10B	NM_147187.1	0.45269	0.546645	0.00287597	0.118076	0.350015	0.00747062	4.16498e-05	0.000316704	-0.0197236	0.000143118	0.000862073	-0.0249821	0.000126432	0.000536461	-0.0590714	5.59754e-07	1.10228e-05	-0.0576448
TNFRSF10B_P108_R	Y	TNFRSF10B	NM_147187.1	0.124045	0.205094	0.107773	0.389647	0.606677	-0.0153228	0.00193033	0.00673862	0.241167	0.00682385	0.0151029	-0.0570213	0.0757885	0.108795	0.137785	0.00127031	0.00512126	-0.0611894
TNFRSF10C_E109_F	Y	TNFRSF10C	NM_003841.2	4.79266e-06	2.95644e-05	0.323898	0.643852	0.796481	0.0194932	0.0972824	0.175177	-0.116967	4.22314e-08	6.48675e-06	-0.365268	3.82842e-08	9.64008e-07	0.503751	0.135642	0.253463	0.118028
TNFRSF10C_P612_R	N	TNFRSF10C	NM_003841.2	0.00441973	0.0130301	-0.0991603	0.483554	0.677682	-0.0106825	0.0940839	0.170617	0.0144428	0.727522	0.782402	-0.0112898	0.0771639	0.110357	-0.191697	0.328068	0.505429	-0.0658639
TNFRSF10C_P7_F	Y	TNFRSF10C	NM_003841.2	1.49598e-10	2.18841e-09	0.490789	0.178837	0.408409	0.110661	0.943075	0.956778	-0.00475774	1.95654e-06	7.5131e-05	-0.395319	5.2842e-14	6.76377e-12	0.660172	0.0259192	0.0677072	0.18083
TNFRSF10D_E27_F	Y	TNFRSF10D	NM_003840.3	0.226405	0.3217	0.104108	0.000346568	0.0066541	-0.0600366	0.552131	0.648374	0.0514911	7.79733e-09	2.39534e-06	-0.554716	7.69727e-17	3.82027e-14	0.784406	5.81809e-05	0.000353225	0.452418
TNFRSF10D_P70_F	Y	TNFRSF10D	NM_003840.3	0.916033	0.938018	-0.00996247	3.18924e-08	2.72149e-06	-0.211467	0.435899	0.549254	-0.0486318	2.9624e-05	0.000344716	-0.402325	2.37912e-08	6.52559e-07	0.458039	0.00158366	0.0062532	0.235444
TNFRSF1A_P678_F	N	TNFRSF1A	NM_001065.2	0.000226925	0.000974417	0.067014	0.147768	0.38549	-0.0836186	0.100157	0.178884	-0.0212782	0.846067	0.885258	0.00249312	0.107169	0.147767	0.0569915	0.172121	0.307059	-0.0959415
TNFRSF1B_E5_F	Y	TNFRSF1B	NM_001066.2	0.0254118	0.0566509	0.132544	0.52471	0.710703	-0.00715022	0.516823	0.617294	0.0283192	0.352332	0.437737	-0.0193199	0.432446	0.496069	0.0730822	0.703923	0.828526	-0.0173714
TNFRSF1B_P167_F	Y	TNFRSF1B	NM_001066.2	0.0178219	0.0423753	0.172671	0.400053	0.615096	-0.0121163	0.185439	0.292138	0.0598428	0.0275631	0.0489445	-0.0167765	0.000522365	0.00152829	0.398989	0.880022	0.929054	0.00868294
TNFSF10_E53_F	N	TNFSF10	NM_003810.2	1.70057e-11	2.96826e-10	-0.290227	9.44713e-21	1.45108e-17	-0.319479	0.308398	0.428053	0.0397162	0.922099	0.94549	-0.00626033	0.0669529	0.0974783	0.170482	0.698544	0.825356	-0.0286587
TNFSF10_P2_R	N	TNFSF10	NM_003810.2	2.71144e-11	4.47826e-10	-0.512097	8.61197e-18	6.614e-15	-0.563926	3.4837e-05	0.000274409	0.266874	0.896802	0.926977	0.0113667	0.000319435	0.00105744	0.287768	0.0885594	0.180169	-0.14614
TNFSF8_E258_R	N	TNFSF8	NM_001244.2	0.14945	0.236167	-0.0402197	0.251461	0.482805	-0.0357264	0.571089	0.663034	0.0094745	0.0571236	0.0914931	0.0312587	0.0472318	0.0714055	0.0580592	0.0564558	0.125858	-0.0886687
TNFSF8_P184_F	Y	TNFSF8	NM_001244.2	0.00204188	0.00674478	-0.211655	0.732652	0.862339	-0.0197293	0.305827	0.426657	0.054921	0.000344298	0.00155958	-0.24355	0.228364	0.287751	0.0854271	0.831802	0.906858	0.013375
TNF_P1084_F	N	TNF	NM_000594.2	0.0591816	0.111128	-0.0531715	0.153981	0.38887	-0.0325081	0.623233	0.708052	-0.0021635	0.533015	0.608255	-0.00768334	0.463101	0.524574	0.026451	0.199525	0.347079	0.0343988
TNF_P158_F	N	TNF	NM_000594.2	0.119591	0.199449	0.102653	0.834749	0.919186	0.0162021	0.00496941	0.0147355	0.140308	0.000219157	0.00113342	0.244775	0.276437	0.342425	0.122127	0.0427483	0.100862	-0.186755
TNK1_P221_F	Y	TNK1	NM_003985.1	1.59634e-13	3.77228e-12	0.440963	0.00186829	0.0243194	-0.146358	0.00695485	0.0192828	0.174039	0.16648	0.228724	-0.0933868	0.00365562	0.00732236	-0.212295	0.0151677	0.0430639	-0.209681
TNK1_P41_R	Y	TNK1	NM_003985.1	1.6325e-12	3.38855e-11	0.498439	9.04922e-05	0.00227862	-0.101319	0.023369	0.0543038	0.176604	0.0029618	0.0076203	-0.0976893	0.0855622	0.120351	-0.0660306	0.00018249	0.000946976	-0.0866062
TP73_E155_F	Y	TP73	NM_005427.1	0.08494	0.148091	0.135419	0.606596	0.768756	0.0141117	0.770521	0.828766	-0.00190167	0.00126983	0.0040466	-0.0147415	0.0631368	0.0927133	0.123187	0.00107487	0.00442678	-0.0339076
TP73_P496_F	Y	TP73	NM_005427.1	0.207672	0.301497	0.00693041	0.765432	0.879849	0.00116783	0.528953	0.627877	-0.00567333	0.00184306	0.00531168	-0.0166741	5.75816e-05	0.000299815	-0.0319903	1.33173e-07	3.35334e-06	-0.0321328
TP73_P945_F	Y	TP73	NM_005427.1	0.00144852	0.00507973	0.308587	0.247345	0.477889	-0.0172751	0.123923	0.21244	0.0995245	0.00535303	0.0126302	-0.0298234	0.0112156	0.0197777	0.308604	0.22067	0.373292	0.0880727
TPEF_seq_44_S36_F	Y	TMEFF2	NM_016192.2	0.0018005	0.006105	0.184016	0.478385	0.674058	0.0066555	1.84524e-05	0.000171091	-0.0205338	0.458216	0.540568	-0.0103307	0.000536757	0.00154886	-0.023474	0.46871	0.640157	-0.00895871
TPEF_seq_44_S88_R	Y	TMEFF2	NM_016192.2	1.41771e-06	9.97305e-06	0.558603	0.0178745	0.116336	-0.0341801	0.998723	0.999374	-5.89501e-05	0.00138739	0.00425355	-0.0449768	0.000168718	0.000663626	-0.0574405	0.848961	0.914449	-0.00602401
TRAF4_P372_F	Y	TRAF4	NM_145751.1	0.00365896	0.0112013	-0.0283533	0.0046205	0.0463862	-0.0276779	2.59217e-06	3.65281e-05	-0.0661539	0.000845249	0.00294399	-0.0661837	0.00156539	0.00359945	-0.0829177	1.26993e-05	0.000102126	-0.0842165
TRIM29_E189_F	Y	TRIM29	NM_012101.2	0.00174762	0.00593881	-0.184995	0.0379857	0.195137	-0.120205	0.140149	0.235782	-0.044087	0.00453669	0.0110259	-0.137143	0.00979262	0.0175308	0.117015	0.992439	0.993733	-0.000731189
TRIM29_P135_F	N	TRIM29	NM_012101.2	0.00269336	0.00865481	-0.199893	0.35769	0.5753	-0.0304886	0.0562614	0.11267	-0.0836315	1.05642e-05	0.000174479	-0.335432	0.897307	0.91155	-0.00327119	0.411847	0.591213	0.012051
TRIM29_P261_F	N	TRIM29	NM_012101.2	0.0568218	0.107884	-0.0536403	0.142907	0.382999	-0.0781033	0.0736575	0.139401	-0.107267	3.28167e-07	2.65297e-05	-0.493767	5.17545e-06	4.84725e-05	0.079498	0.0499614	0.113354	0.0485158
TRIP6_E33_F	Y	TRIP6	NM_003302.1	0.361511	0.459669	-0.005495	0.618401	0.777302	-0.00403183	0.00335023	0.0106682	0.208796	0.981665	0.986159	-0.000645001	3.36066e-07	5.73552e-06	0.558587	0.51362	0.676025	0.0471063
TRIP6_P1090_F	Y	TRIP6	NM_003302.1	5.62963e-09	6.45307e-08	0.216319	2.785e-09	3.88887e-07	0.212899	1.3993e-05	0.000136899	0.169459	5.98304e-05	0.000509608	0.2241	6.66573e-05	0.000329214	-0.264597	0.0150104	0.0427755	-0.148161
TRIP6_P1274_R	Y	TRIP6	NM_003302.1	0.0222923	0.0508213	0.0904825	0.629881	0.785306	-0.0467779	3.13247e-08	1.33652e-06	0.295427	7.72906e-06	0.000138045	0.356195	3.49854e-07	5.90522e-06	-0.33509	0.119636	0.228843	-0.117405
TRPM5_E87_F	N	TRPM5	NM_014555.2	5.80041e-05	0.000284062	-0.289374	0.0480194	0.218295	-0.118333	0.305355	0.426504	-0.022834	0.141718	0.200625	-0.0702002	0.656203	0.706326	-0.0131181	0.768844	0.868774	0.00802475
TRPM5_P721_F	N	TRPM5	NM_014555.2	0.00394772	0.0118663	-0.171659	0.254728	0.486645	-0.0932431	0.838299	0.879811	-0.006313	0.192645	0.259792	-0.0709462	0.485491	0.547113	0.0721972	0.629389	0.770312	0.0449985
TRPM5_P979_F	N	TRPM5	NM_014555.2	0.000474883	0.00190628	-0.107274	0.277928	0.499296	-0.0265725	0.427396	0.540872	-0.00864666	0.0274126	0.0487336	0.0204416	9.61479e-07	1.33048e-05	0.121068	0.0381023	0.0920936	0.100325
TSC2_E140_F	N	TSC2	NM_000548.2	7.74379e-07	5.71849e-06	-0.218721	0.000150866	0.00331043	-0.222263	0.354988	0.469245	0.0494654	0.0472231	0.0779105	0.135857	0.7313	0.775744	0.0311483	0.430917	0.606324	-0.0666713
TSG101_P139_R	Y	TSG101	NM_006292.2	0.0296908	0.0644139	-0.0300197	0.788493	0.896403	-0.00619999	0.000114453	0.000700397	-0.045519	8.41022e-05	0.000625396	-0.0651688	0.000527335	0.00153117	-0.110461	0.00155235	0.0061454	-0.0941617
TSG101_P257_R	Y	TSG101	NM_006292.2	0.135796	0.220024	-0.0351839	0.878923	0.940317	-0.00571389	3.7259e-07	8.41615e-06	-0.128947	0.00235505	0.00637983	-0.0996162	0.0340368	0.0530228	-0.104996	0.0286758	0.0734101	-0.10658
TSP50_E21_R	Y	TSP50	NM_013270.2	0.0633865	0.117729	0.068548	0.737364	0.865234	-0.0262695	0.124205	0.212685	0.0798033	0.0906866	0.135501	0.0995113	2.54864e-06	2.7227e-05	0.234443	6.25513e-05	0.000373847	0.174407
TSP50_P137_F	Y	TSP50	NM_013270.2	0.362075	0.460006	0.0733533	0.494408	0.686008	0.0640292	0.933754	0.950461	-0.00612922	0.854327	0.891472	-0.0158152	0.125205	0.16959	0.158649	0.256359	0.419795	0.0888258
TUBB3_E91_F	Y	TUBB3	NM_006086.2	0.510217	0.595965	-0.0401725	0.650557	0.800686	-0.027385	0.936925	0.952428	0.00420244	0.887094	0.920038	-0.00943007	0.0389384	0.0598094	0.0777947	0.721621	0.839069	0.016911
TUBB3_P364_F	Y	TUBB3	NM_006086.2	0.314078	0.414454	0.0721127	0.125546	0.361804	0.00435493	6.13562e-06	7.30974e-05	-0.0181733	3.06843e-05	0.000354369	-0.0248597	0.000241602	0.000847263	-0.030229	0.59136	0.736461	-0.0112119
TUBB3_P721_R	Y	TUBB3	NM_006086.2	0.000556745	0.00215406	0.35803	0.00893557	0.0754123	-0.0167723	0.000429516	0.00198119	-0.027375	9.88036e-05	0.000691143	-0.0419503	0.00189076	0.00422122	-0.0392279	0.00011296	0.000621886	-0.0381526
TUSC3_E29_R	Y	TUSC3	NM_178234.1	0.0334934	0.0709349	-0.0212155	0.37927	0.596884	-0.0109169	0.000963078	0.0038126	-0.0494826	0.0074805	0.0163676	-0.0596074	0.000402418	0.00127446	-0.0439974	0.420675	0.59774	0.051598
TUSC3_P85_R	Y	TUSC3	NM_178234.1	0.572746	0.652141	-0.00537872	0.225124	0.451424	-0.0104704	7.59792e-05	0.000509625	-0.0340802	0.000645259	0.00244514	-0.042926	0.00138328	0.00325377	-0.0562642	0.336491	0.513716	0.0614175
TWIST1_E117_R	Y	TWIST1	NM_000474.3	0.606137	0.685083	-0.00296755	0.48776	0.680472	0.00664691	0.000132249	0.000772376	-0.0248066	0.00626967	0.0141621	-0.0268456	0.343174	0.41213	0.0454312	0.66862	0.80137	0.0141117
TWIST1_P355_R	Y	TWIST1	NM_000474.3	0.0180656	0.0428885	0.19743	0.530729	0.712587	-0.0149178	0.292809	0.413917	-0.0266019	2.72779e-05	0.000324797	-0.0746071	0.316981	0.384584	-0.0241445	0.935747	0.959484	0.00299893
TWIST1_P44_R	Y	TWIST1	NM_000474.3	0.228606	0.323928	0.112861	0.157394	0.389546	-0.0277734	0.531296	0.63017	-0.027107	0.000566195	0.0022403	-0.0786903	0.122502	0.166517	-0.0409172	0.880666	0.929054	-0.00756039
TYK2_P494_F	Y	TYK2	NM_003331.3	0.00379776	0.011483	-0.0563516	0.00334724	0.0375282	-0.0649894	1.0145e-08	7.79133e-07	-0.0993855	1.7521e-05	0.000251325	-0.107614	0.0125008	0.0217701	-0.0816106	0.00149524	0.0059346	-0.0754017
TYRO3_P366_F	Y	TYRO3	NM_006293.2	0.0784188	0.139411	0.0890622	0.277725	0.499296	-0.0237487	0.416422	0.531691	0.0308889	0.11201	0.163233	-0.0401104	0.000354938	0.00114294	-0.0684081	0.821205	0.902895	-0.00727122
TYRO3_P501_F	N	TYRO3	NM_006293.2	4.24725e-08	4.12807e-07	0.520451	0.199235	0.431628	-0.00862828	0.109313	0.191892	0.064094	0.738011	0.791057	-0.00208382	0.000839315	0.00218877	-0.0419719	0.980619	0.985753	-0.000919712
UBA52_P293_R	Y	UBA52	NM_003333.2	0.467686	0.559039	-0.0114772	0.296745	0.515028	0.0352853	2.96572e-05	0.000242305	-0.119474	5.56185e-05	0.000485398	-0.150141	0.284629	0.351157	-0.0480733	0.0380708	0.0920936	-0.0559192
UGT1A1_E11_F	N	UGT1A1	NM_000463.2	0.00583478	0.016505	-0.0922585	0.244582	0.474342	-0.0617905	0.0312003	0.0686586	-0.0241862	0.058153	0.0926587	-0.0632167	0.691681	0.738819	-0.00862679	0.000887471	0.00378654	0.0268654
UGT1A1_P315_R	N	UGT1A1	NM_000463.2	2.54002e-05	0.000134999	-0.313386	0.000357218	0.0067739	-0.310077	0.00177706	0.00631845	-0.175997	0.000915305	0.0031312	-0.275949	0.0179322	0.0299715	-0.191716	0.784646	0.87972	-0.0272044
UGT1A1_P564_R	N	UGT1A1	NM_000463.2	0.0547261	0.105074	-0.0374655	0.312239	0.534861	-0.0293013	0.198358	0.307755	0.0087345	0.159039	0.220274	0.0134604	2.08385e-05	0.000138562	0.221912	0.0693183	0.147265	0.152985
UGT1A7_P751_R	N	UGT1A7	NM_019077.2	0.0332641	0.0706676	-0.096752	0.133463	0.370034	-0.0392881	0.024935	0.0570793	-0.016406	0.468197	0.547769	-0.00772511	0.00304326	0.00628286	0.0393842	0.908778	0.948698	-0.00481583
UNG_P170_F	Y	UNG	NM_003362.2	0.00465047	0.0136842	0.0427653	0.433541	0.635947	-0.00381573	2.78271e-05	0.000232295	-0.0309249	0.000129314	0.000817394	-0.0384845	0.0762759	0.109291	-0.0239666	0.243576	0.403596	-0.0178989
USP29_E274_F	N	USP29	NM_020903.2	0.00148198	0.00517346	-0.0589564	0.210614	0.442548	-0.0480695	0.0289292	0.0641202	-0.0216305	0.0865604	0.130734	-0.0141587	0.158471	0.209476	0.0185943	0.00148984	0.00592848	0.0330864
USP29_P205_R	Y	USP29	NM_020903.2	0.00200078	0.00665194	-0.10744	0.41977	0.629721	-0.015918	0.00121933	0.00457773	0.0508837	0.00508832	0.012155	0.0626722	0.000204076	0.000768286	0.130761	2.62779e-06	3.20341e-05	0.130874
USP29_P282_R	Y	USP29	NM_020903.2	0.00187744	0.00631016	-0.0342813	0.216372	0.443721	-0.0459449	0.89176	0.919909	-0.000930508	0.261999	0.339032	-0.0168289	0.000229255	0.000821263	0.088603	1.66831e-06	2.35095e-05	0.0890273
VAMP8_E7_F	N	VAMP8	NM_003761.2	0.617371	0.696242	0.0176929	0.212575	0.443033	-0.107965	0.61025	0.69691	0.0140572	0.146472	0.205462	-0.096262	2.08769e-06	2.35787e-05	0.212864	0.48474	0.654272	-0.057823
VAMP8_P114_F	N	VAMP8	NM_003761.2	0.00872411	0.0230245	-0.168395	0.3438	0.565392	-0.0709829	0.0382608	0.0820791	-0.0872885	0.0308776	0.0540182	-0.111889	0.795806	0.830407	-0.0198321	0.276616	0.446305	-0.0668529
VAMP8_P241_F	N	VAMP8	NM_003761.2	0.16416	0.254696	-0.0603454	0.217118	0.444657	-0.0721483	0.673563	0.749162	-0.0072645	0.0172765	0.0328011	-0.137685	0.137999	0.185772	0.0668693	0.538022	0.695624	-0.0377036
VAV1_E9_F	Y	VAV1	NM_005428.2	0.759612	0.818781	0.0228066	0.233082	0.460764	-0.115576	0.0239625	0.0554314	-0.152921	0.0722093	0.111695	-0.154224	0.00077339	0.00204815	0.219175	0.922055	0.955008	-0.00768601
VAV1_P317_F	N	VAV1	NM_005428.2	0.166053	0.256855	-0.0840895	0.0767045	0.279946	-0.157247	0.0054359	0.0157739	-0.204579	0.574582	0.64609	-0.0304656	0.000296266	0.000991426	0.266096	0.925341	0.957765	0.00908341
VAV2_E58_F	Y	VAV2	NM_003371.2	0.907942	0.932921	0.000272317	0.215652	0.443615	0.00407326	0.027878	0.0622392	-0.00987525	0.0032448	0.00826537	-0.0181416	0.000170233	0.000667036	-0.0851286	8.88567e-07	1.5506e-05	-0.0828154
VAV2_P1182_F	Y	VAV2	NM_003371.2	1.74591e-05	9.64648e-05	0.342373	0.136203	0.374255	-0.0132184	3.10694e-05	0.000248556	-0.0254056	6.09417e-06	0.000115564	-0.0336546	0.679335	0.727656	0.0381363	0.23756	0.396622	-0.0825901
VBP1_E127_F	Y	VBP1	NM_003372.4	0.0327257	0.069718	-0.245188	0.125482	0.361804	-0.165773	0.174481	0.280631	-0.125234	0.932363	0.951749	0.0104676	0.113563	0.155328	-0.0743744	0.0172694	0.0482288	0.270163
VBP1_P12_R	Y	VBP1	NM_003372.4	0.0420801	0.0848742	-0.134611	0.350363	0.568456	-0.0752359	0.429136	0.542512	-0.0498462	0.1968	0.264004	-0.0883642	0.0368478	0.0568256	-0.0566419	0.052234	0.117456	0.148752
VBP1_P194_F	Y	VBP1	NM_003372.4	0.00534778	0.015325	-0.181713	0.0635683	0.250361	-0.141202	0.0756996	0.142145	-0.0906613	0.36759	0.454604	-0.065001	0.101379	0.140794	-0.0455688	0.0235506	0.0624761	0.11563
VEGFB_P658_F	Y	VEGFB	XM_938483.1	1.42685e-07	1.23822e-06	0.121641	0.624233	0.780806	-0.00718909	0.0652916	0.127593	-0.0339967	0.00164226	0.004851	-0.0730905	0.000273636	0.00093818	-0.0887421	9.58624e-05	0.000537389	-0.0728363
VIM_P343_R	Y	VIM	NM_003380.2	0.866091	0.908686	-0.0006659	0.391044	0.60719	-0.00269123	0.63931	0.722801	-0.00321128	4.8246e-05	0.000444874	-0.0177765	1.71312e-05	0.00012296	-0.0733938	1.83779e-06	2.47618e-05	-0.0656456
VIM_P811_R	Y	VIM	NM_003380.2	0.326698	0.426708	0.00378006	0.826297	0.914133	-0.000593721	0.000438559	0.00201083	0.260421	0.000195837	0.00105229	-0.0260296	0.0249311	0.0400986	0.155804	0.800426	0.888976	0.0134568
WEE1_P924_R	N	WEE1	NM_003390.2	0.000881553	0.00325497	0.054253	0.424059	0.631769	-0.0488424	0.0411474	0.0866973	0.0182352	0.0913349	0.136072	-0.0673967	0.00154716	0.00356287	0.177578	2.23643e-05	0.000162036	0.181882
WNT10B_P823_R	Y	WNT10B	NM_003394.2	1.67421e-12	3.42878e-11	0.431551	0.651471	0.801168	0.0451394	0.0219743	0.0513738	0.108419	0.803532	0.850603	-0.0178195	1.09605e-07	2.15838e-06	0.5665	0.0835524	0.171802	0.188264
WNT10B_P993_F	Y	WNT10B	NM_003394.2	5.09096e-07	3.89041e-06	0.444476	0.264733	0.494049	0.0745734	0.167782	0.272136	0.0607149	0.139104	0.197289	-0.0581522	3.70189e-05	0.000214463	0.459928	0.37253	0.552856	0.0658664
WNT1_E157_F	Y	WNT1	NM_005430.2	0.00598866	0.0169091	0.191998	0.870708	0.938386	-0.00296249	0.725235	0.792291	0.0153456	6.64828e-06	0.000123033	-0.0545229	1.15936e-06	1.50913e-05	-0.151092	1.28782e-08	6.59361e-07	-0.1438
WNT1_P79_R	Y	WNT1	NM_005430.2	8.49814e-05	0.000402875	0.2821	0.0925335	0.311117	-0.0340813	9.40829e-07	1.71872e-05	-0.0709025	0.282177	0.361187	-0.0390753	0.0049309	0.00956646	-0.109259	0.00048324	0.002229	-0.112777
WNT2B_P1185_R	Y	WNT2B	NM_024494.1	0.0739226	0.132957	0.0794028	0.20027	0.433259	0.00679155	1.91957e-05	0.000176555	-0.0384123	0.0134277	0.0264422	-0.0377845	0.000322301	0.00106463	-0.0586422	7.49978e-06	6.98161e-05	-0.0550813
WNT2B_P1195_F	Y	WNT2B	NM_024494.1	0.202542	0.295727	0.0117072	0.585965	0.751915	0.0014951	0.000479225	0.00215862	-0.0137559	0.00122143	0.00392552	-0.016714	8.85209e-05	0.00040709	-0.0675398	0.0285157	0.0732443	-0.0505775
WNT2_E109_R	Y	WNT2	NM_003391.1	0.00441534	0.0130301	0.160398	0.438072	0.639684	-0.00542967	0.000547907	0.00241142	-0.0458311	3.74168e-08	6.48675e-06	-0.0841321	0.763643	0.802295	0.00346127	0.423247	0.600233	0.0232562
WNT2_P217_F	Y	WNT2	NM_003391.1	0.000494803	0.00195827	0.442743	0.0290506	0.16405	-0.045932	0.000172091	0.000947428	-0.039488	0.00219864	0.00605217	-0.045426	7.91815e-06	6.94987e-05	-0.109879	2.7737e-05	0.00019191	-0.0910447
WNT5A_E43_F	Y	WNT5A	NM_003392.3	0.917784	0.939185	-0.000757334	0.499372	0.68978	-0.00418644	1.13123e-05	0.000116421	-0.0257506	0.000101039	0.000702242	-0.0315052	1.78299e-06	2.12301e-05	-0.080387	1.75504e-09	1.41881e-07	-0.078074
WNT5A_P655_F	Y	WNT5A	NM_003392.3	0.395886	0.491932	0.00472546	0.675115	0.820512	-0.00167115	4.50032e-06	5.54204e-05	-0.0315841	0.000665504	0.00246912	-0.0334254	0.0182232	0.0303918	-0.0155667	0.763941	0.866201	0.00539242
WNT8B_E487_F	N	WNT8B	NM_003393.2	5.02309e-08	4.82216e-07	-0.329623	0.00633038	0.058575	-0.197525	0.243459	0.35957	0.0173337	0.214092	0.283487	-0.0301658	0.0164629	0.0276967	-0.21611	0.310277	0.486809	-0.0740357
WNT8B_P216_R	N	WNT8B	NM_003393.2	0.00270121	0.00866191	-0.103785	0.103134	0.325613	-0.0899932	0.110888	0.194211	0.012698	0.607421	0.676576	0.00730956	0.000194826	0.000740723	0.0989623	0.496238	0.660503	-0.0520203
WRN_E57_F	Y	PURG	NM_001015508.1	0.559229	0.640549	-0.0106492	0.248135	0.478813	-0.020854	0.0246339	0.0566745	-0.0284629	0.00292876	0.00756064	-0.050495	0.0237304	0.0384358	-0.0612227	0.0010924	0.00446256	-0.073653
WRN_P969_F	Y	WRN	NM_000553.2	0.947943	0.962711	-0.000966677	0.0561751	0.23447	-0.143326	0.0284886	0.0632348	-0.100794	0.00127756	0.0040544	-0.258863	0.165043	0.217229	0.0885739	2.3452e-06	3.02708e-05	0.380453
WT1_E32_F	Y	WT1	NM_024424.2	0.0808149	0.14219	-0.0132984	0.722963	0.854665	0.0129601	0.000551391	0.00241982	-0.0201422	0.0163659	0.0313833	-0.0207228	0.120753	0.164429	-0.0203153	0.0061269	0.0202385	-0.0267693
WT1_P1131_F	Y	WT1	NM_024424.2	0.963068	0.971288	0.00136719	0.281375	0.502548	0.0292511	4.80319e-05	0.000354697	-0.0881613	0.000732064	0.00262624	-0.103262	0.0178891	0.0299321	0.302088	0.152561	0.278386	0.084907
WT1_P853_F	Y	WT1	NM_024424.2	0.339268	0.436811	0.0220102	0.542103	0.718438	0.0201496	0.537577	0.634193	-0.0185015	0.112402	0.163649	-0.050675	0.103897	0.143771	0.114089	0.841603	0.912281	0.00778745
XPC_P226_R	Y	XPC	NM_004628.3	0.00628165	0.0175429	-0.0741351	0.260081	0.49228	-0.054278	0.0293121	0.0647818	-0.0671308	0.0392877	0.0666943	-0.0765809	0.338625	0.407647	-0.0619443	0.593404	0.736461	-0.0285879
XRCC1_P681_R	Y	XRCC1	NM_006297.1	0.0166379	0.0404365	0.0323643	0.16204	0.39122	-0.100321	0.724296	0.791828	-0.00892183	0.249659	0.32443	-0.0654238	0.2328	0.292859	0.0492977	0.00100346	0.00417184	0.0710249
XRCC2_P1077_F	N	XRCC2	NM_005431.1	0.739449	0.802682	-0.00143874	0.204182	0.438634	-0.0222381	0.313937	0.432085	-0.00440983	0.184518	0.249929	0.00516778	0.0012277	0.00297436	0.0424298	0.000103865	0.000575946	0.0369576
Xist_seq_80_S47_R	N	XIST	NR_001564.1	0.0502575	0.0977158	-0.124911	0.434041	0.635947	-0.0452753	0.420007	0.535317	-0.0365328	0.272418	0.349569	-0.0548187	0.0515546	0.0773319	0.141776	0.39676	0.576654	0.0440531
Xist_seq_80_S95_R	N	XIST	NR_001564.1	0.591094	0.670052	-0.0264503	0.549457	0.723937	-0.0345333	0.893821	0.921415	-0.00610366	0.906516	0.933876	-0.00617755	0.644929	0.696142	0.0317305	0.144696	0.267775	-0.0910138
YES1_P216_F	Y	YES1	NM_005433.3	0.20662	0.300254	0.00256965	0.146646	0.383729	0.00358621	0.00075474	0.00309968	-0.00855935	1.45938e-05	0.000224089	-0.0140084	0.00173271	0.0039139	-0.0291151	1.61979e-05	0.000123168	-0.0305563
YES1_P600_F	Y	YES1	NM_005433.3	0.0198181	0.0461538	0.139826	0.557425	0.728922	0.00391673	0.446954	0.559714	0.0198926	0.495553	0.572308	-0.00858007	0.113348	0.155171	0.148536	0.0177905	0.0492365	-0.0342259
ZAP70_P220_R	N	ZAP70	NM_001079.3	0.0242912	0.054593	-0.108749	8.24899e-06	0.000281566	-0.385403	0.0655441	0.127761	-0.0713605	0.0103547	0.0211783	-0.151036	0.0596101	0.0879549	0.0552879	0.612494	0.754443	-0.0164543
ZIM2_E110_F	Y	ZIM2	NM_015363.3	0.217184	0.312355	-0.0628542	0.265646	0.494049	-0.0628138	0.0391776	0.0838117	-0.0714452	0.173744	0.237641	-0.0657767	0.189778	0.24537	-0.133921	0.816745	0.902895	-0.0157579
ZIM2_P22_F	Y	ZIM2	NM_015363.3	0.161049	0.251115	-0.0778406	0.0798295	0.287836	-0.0980748	0.0134796	0.0339979	-0.0946637	0.0158855	0.0306919	-0.116881	0.194281	0.250348	-0.146892	0.428047	0.604302	-0.0582693
ZIM3_E203_F	N	ZIM3	NM_052882.1	0.00417741	0.0124592	-0.110257	0.166328	0.395064	-0.0580192	0.0301214	0.0664749	-0.0236745	0.0912574	0.136072	-0.0407524	0.268754	0.333446	0.0611613	0.544399	0.700111	0.0393463
ZIM3_P451_R	Y	ZIM3	NM_052882.1	0.023634	0.0532284	-0.0175647	0.405349	0.617675	-0.00966622	0.249497	0.367076	-0.00349834	0.343425	0.428166	-0.00330755	1.88955e-05	0.000130653	0.0608598	0.836311	0.910399	0.0100383
ZIM3_P718_R	N	ZIM3	NM_052882.1	0.00022711	0.000974417	-0.224312	0.086338	0.300034	-0.122503	0.03595	0.0776641	-0.053355	0.0281258	0.049771	-0.146	0.343135	0.41213	0.0325045	0.365941	0.547694	-0.0749367
ZMYND10_E77_R	Y	ZMYND10	NM_015896.2	0.0482141	0.09434	0.16779	0.633536	0.787945	0.00371108	0.342231	0.459098	0.0628495	0.0455722	0.0759208	-0.0401093	4.25888e-06	4.14028e-05	0.592745	0.812603	0.89925	-0.00739403
ZMYND10_P329_F	Y	ZMYND10	NM_015896.2	1.69858e-07	1.40517e-06	0.538898	0.0176167	0.115146	-0.0436199	0.0105536	0.0277574	0.194443	0.30237	0.383518	0.0900687	3.74875e-10	2.13262e-08	0.481457	0.393396	0.574661	-0.0873511
ZNF215_P129_R	Y	ZNF215	NM_013250.1	3.69237e-11	5.84689e-10	0.57996	0.334464	0.555274	-0.0387124	0.53345	0.631297	0.0406288	0.0146956	0.0286452	-0.0853829	0.00172019	0.00390281	0.383608	0.0314043	0.0789845	0.148952
ZNF215_P71_R	Y	ZNF215	NM_013250.1	3.70696e-05	0.000187299	0.367876	0.208796	0.439666	-0.0545837	0.144529	0.24209	-0.0906225	0.00785887	0.0170639	-0.16451	0.000238148	0.000842287	0.375591	0.219332	0.371437	0.101284
ZNF264_E48_R	Y	ZNF264	NM_003417.2	0.269048	0.368248	-0.0181993	0.840403	0.922443	0.00475018	7.49167e-07	1.45661e-05	-0.0719254	0.00033222	0.00151422	-0.0722634	0.00446418	0.00875732	-0.062261	0.00223322	0.00853289	-0.0527975
ZNF264_P397_F	Y	ZNF264	NM_003417.2	0.182501	0.275365	0.100604	0.0489423	0.21932	-0.160318	0.456042	0.566274	0.0469532	0.243552	0.317839	-0.121889	0.00151294	0.0035051	0.326906	0.0905647	0.183036	0.192204
ZNFN1A1_E102_F	Y	ZNFN1A1	NM_006060.2	1.46748e-07	1.26632e-06	-0.362885	0.0956291	0.314329	-0.110826	0.0681197	0.13079	0.0591395	0.700682	0.759525	-0.0187151	0.887815	0.9037	-0.0136339	0.0196548	0.0537184	0.191171
ZNFN1A1_P179_F	N	ZNFN1A1	NM_006060.2	0.0331809	0.0705897	-0.0780531	0.17344	0.403274	-0.0163883	0.153542	0.252863	0.00528683	0.526444	0.602547	-0.0125087	0.00105657	0.00263884	0.03599	9.53199e-05	0.000536305	0.0327479
ZP3_E90_F	Y	ZP3	XM_939654.1	2.362e-05	0.000125973	0.399529	0.946318	0.969676	0.00224952	0.0117714	0.030539	0.130909	0.341105	0.425965	0.0141542	0.00230917	0.00501682	0.296678	0.115632	0.223266	0.129604
ZP3_P220_F	N	ZP3	XM_939654.1	3.51308e-06	2.20807e-05	0.199215	0.0113219	0.0848651	-0.202934	0.0199258	0.0472314	0.0792537	0.534049	0.608531	0.0430369	0.00349407	0.007071	0.139572	0.273106	0.441438	0.0632467
p16_seq_47_S188_R	Y	.	.	9.75534e-22	9.36513e-20	0.755485	0.0436274	0.206952	-0.0444303	0.00292892	0.00951125	0.286932	8.84409e-05	0.000637771	-0.0218973	0.000556124	0.00157644	-0.0346164	0.000149699	0.000795634	-0.0308225
p16_seq_47_S85_F	Y	.	.	9.17677e-16	2.61028e-14	0.432709	0.804309	0.905733	-0.0144812	0.559592	0.653637	0.0477012	0.00100417	0.00336769	-0.210704	0.000798476	0.0021037	-0.225637	0.0241983	0.0640838	-0.148726
Table Note: Significance measures are based on reference tissues as described in manuscript.
